# Supplementary material
Source: Research Square preprint supplement (doi:10.21203/rs.3.rs-9401592/v1)
Supplement: Supplementary file 1 [file 8c87bbe66075551bb125e290.xlsx]

## Sheet: Table S1
Table S1 SHRIMP U-Pb data for zircon from the the 3.95 Ga trondhjemitic gneiss in the Labashan area, eastern Hebei, North China Craton
Spot a	206Pbc (%) b	U (ppm)	Th (ppm)	Th/U	206Pb* (ppm)c	207Pb*	%	207Pb*	%	206Pb*	%	err	206Pb/238U	1σ	207Pb/206Pb	1σ	Discordance
						/206Pb* d		/235U		/238U		corr	age (Ma)		age (Ma)		(%) e
Trondhjemitic gneiss (J2302)
J2302-1.1MA	0.07	74	57	0.8	51.3	0.4089	0.95	45.53	2.1	0.808	1.9	0.891	3816	54	3942	14	3
J2302-1.2R	0.33	151	9	0.06	71.5	0.2505	0.64	18.94	1.8	0.5486	1.7	0.937	2819	40	3188	10	12
J2302-2.1MA	0.04	307	158	0.53	215	0.4093	0.35	45.95	1.7	0.814	1.7	0.978	3840	48	3943.5	5.3	3
J2302-3.1RC	0.17	30	13	0.46	22.5	0.4102	0.86	48.7	2.4	0.861	2.2	0.931	4005	66	3947	13	-1
J2302-4.1RC	--	61	48	0.81	37.9	0.3003	0.72	30.06	2.1	0.726	1.9	0.937	3519	52	3472	11	-1
J2302-5.1MA	0.18	168	156	0.96	120	0.412	0.43	47.14	1.8	0.83	1.7	0.97	3895	50	3953.5	6.4	1
J2302-6.1R	1	600	68	0.12	113	0.2037	0.7	6.09	1.8	0.2167	1.7	0.922	1265	19	2856	11	56
J2302-7.1MA	0.61	66	53	0.84	48.7	0.4136	0.75	48.64	2	0.853	1.9	0.93	3976	56	3959	11	0
J2302-8.1RC	0.89	449	40	0.09	97.8	0.3422	0.97	11.87	2	0.2515	1.7	0.872	1446	22	3673	15	61
J2302-8.2R	0.87	915	70	0.08	144	0.1913	0.73	4.799	1.8	0.182	1.6	0.912	1078	16	2753	12	61
J2302-9.1R	0.09	88	109	1.28	41.1	0.2859	0.74	21.31	2	0.5406	1.8	0.929	2786	42	3395	11	18
J2302-10.1R	0.11	64	98	1.58	38.8	0.2969	0.71	28.71	2	0.701	1.9	0.936	3426	51	3454	11	1
J2302-11.1MA	0.02	107	85	0.82	75.8	0.4079	0.49	46.39	1.8	0.825	1.8	0.964	3878	52	3938.3	7.3	2
J2302-12.1R	0.1	60	75	1.29	35.8	0.2931	0.75	28.06	2.1	0.694	1.9	0.932	3399	51	3434	12	1
J2302-13.1MA	0.1	121	123	1.05	87	0.4136	0.47	47.68	1.8	0.836	1.8	0.966	3917	51	3959.4	7	1
J2302-14.1RC	0.32	384	67	0.18	161	0.3578	0.39	23.95	1.7	0.4856	1.7	0.974	2552	35	3740.4	5.9	32
J2302-15.1R	0.04	207	122	0.61	120	0.2776	0.45	25.79	1.7	0.674	1.7	0.966	3320	44	3349.6	7.1	1
J2302-16.1R	0.57	891	45	0.05	148	0.2227	1.1	5.9	1.9	0.1921	1.6	0.831	1133	17	3000	17	62
J2302-17.1MA	0.17	574	355	0.64	245	0.3532	0.32	24.16	1.7	0.496	1.7	0.982	2597	36	3721	4.9	30
J2302-18.1RC	0.16	632	84	0.14	153	0.22045	0.43	8.57	1.7	0.2818	1.7	0.969	1600	24	2984	6.9	46
J2302-19.1R	0.16	102	66	0.66	49.3	0.278	1.3	21.48	2.3	0.56	1.9	0.828	2868	44	3352	20	14
J2302-20.1R	0.06	111	91	0.84	65.9	0.2926	0.57	27.89	1.9	0.691	1.8	0.952	3388	47	3431.4	8.8	1
J2302-21.1MA	0.25	419	537	1.33	175	0.3539	0.36	23.65	1.7	0.4848	1.7	0.978	2548	36	3723.8	5.5	32
J2302-21.2MA	0.57	522	592	1.17	156	0.3231	0.42	15.4	1.7	0.3457	1.7	0.971	1914	28	3584.4	6.4	47
J2302-22.1MA	0.45	386	184	0.49	217	0.358	0.35	32.2	1.7	0.652	1.7	0.979	3237	43	3741.5	5.4	13
J2302-22.2MA	0.45	427	175	0.42	215	0.3405	0.36	27.41	1.7	0.5838	1.7	0.978	2964	40	3665.1	5.6	19
J2302-23.1MA	0.02	97	74	0.79	70.3	0.4116	0.51	47.85	1.9	0.843	1.8	0.962	3942	53	3952	7.6	0
J2302-24.1R	0.09	57	76	1.38	35.5	0.2992	0.74	30.02	2.1	0.728	1.9	0.934	3525	53	3466	11	-2
J2302-25.1MA	0.05	108	47	0.45	74.4	0.407	0.51	45.15	1.9	0.805	1.8	0.962	3805	51	3935.1	7.6	3
J2302-26.1MA	0.31	653	715	1.13	160	0.2895	0.46	11.38	1.7	0.285	1.7	0.965	1617	24	3414.9	7.1	53
J2302-27.1RC	0.27	1234	86	0.07	533	0.27896	0.34	19.29	1.7	0.5016	1.7	0.979	2621	36	3357.2	5.4	22
J2302-28.1RC	0.21	712	91	0.13	244	0.2917	0.35	16.04	1.7	0.3989	1.7	0.979	2164	31	3426.6	5.4	37
J2302-29.1MA	0.02	82	55	0.69	60.2	0.4091	0.55	47.9	2.6	0.85	2.6	0.978	3964	76	3942.9	8.3	-1
J2302-30.1MA	0.02	123	94	0.79	87.4	0.4137	0.48	47.21	1.8	0.828	1.8	0.965	3888	52	3959.7	7.1	2
J2302-31.1MA	0.19	759	219	0.3	292	0.3229	0.33	19.89	1.7	0.4468	1.7	0.981	2381	33	3583.8	5	34
J2302-32.1RC	0.51	729	123	0.17	234	0.2568	0.59	13.18	1.8	0.3723	1.7	0.944	2040	29	3227	9.2	37
J2302-32.2R	0.22	473	10	0.02	261	0.27425	0.36	24.24	1.7	0.641	1.7	0.978	3193	43	3330.5	5.6	4
J2302-33.1RC	0.04	872	165	0.2	523	0.33226	0.28	31.94	1.7	0.697	1.7	0.986	3410	44	3627.6	4.3	6
J2302-34.1MA	0.28	211	58	0.28	119	0.3754	0.42	33.94	1.8	0.656	1.7	0.971	3250	44	3813.3	6.4	15
J2302-35.1MA	1.54	1220	217	0.18	299	0.2636	0.53	10.22	1.8	0.2812	1.7	0.953	1597	24	3268.3	8.3	51
J2302-36.1RC	0.44	891	111	0.13	278	0.26283	0.38	13.11	1.7	0.3618	1.7	0.975	1991	29	3263.8	6	39
J2302-37.1MA	0.03	91	52	0.59	63	0.4051	0.51	44.98	1.9	0.805	1.8	0.964	3808	53	3928.1	7.6	3
J2302-38.1MA	0.19	701	62	0.09	227	0.27466	0.36	14.27	1.7	0.3768	1.7	0.978	2062	30	3332.8	5.6	38
J2302-39.1RC	2.3	190	55	0.3	52.3	0.2579	2.3	11.12	2.9	0.3128	1.8	0.616	1754	28	3234	37	46
J2302-39.2RC	0.33	933	118	0.13	282	0.2916	0.39	14.09	1.7	0.3505	1.7	0.974	1937	28	3426	6.1	43
J2302-40.1R	0.46	1133	91	0.08	338	0.25007	0.35	11.91	1.7	0.3456	1.7	0.979	1913	28	3185.2	5.5	40
J2302-41.1RC	0.44	747	83	0.11	255	0.272	0.39	14.82	1.7	0.3951	1.6	0.972	2146	29	3317.6	6.1	35
J2302-42.1RC	0.28	909	536	0.61	443	0.32397	0.29	25.25	1.7	0.5652	1.7	0.985	2888	39	3588.8	4.5	20
J2302-43.1RC	0.11	59	28	0.48	40.3	0.3996	0.63	43.56	2	0.791	1.9	0.95	3755	55	3907.7	9.5	4
J2302-44.1MA	0.82	1047	79	0.08	188	0.1703	1.8	4.86	2.5	0.207	1.7	0.67	1213	18	2560	31	53
J2302-45.1MA	0.26	2662	103	0.04	434	0.212	0.34	5.534	1.6	0.1893	1.6	0.978	1118	16	2920.9	5.5	62
J2302-46.1MA	0.33	1017	486	0.49	271	0.28343	0.34	12.1	1.7	0.3097	1.7	0.98	1739	25	3381.9	5.2	49
J2302-47.1RC	1.07	1222	76	0.06	293	0.2337	0.51	8.89	1.7	0.276	1.6	0.954	1571	22	3077.6	8.1	49
J2302-48.1R	6.32	437	1849	4.37	135	0.2077	2.6	9.63	3.2	0.3364	1.7	0.552	1869	28	2888	43	35
J2302-49.1R	0.09	50	72	1.48	30.7	0.2998	0.8	29.52	2.2	0.714	2	0.929	3474	54	3469	12	0
J2302-50.1RC	0.11	57	88	1.61	34.6	0.293	0.77	28.71	2.2	0.711	2.1	0.938	3461	56	3434	12	-1
J2302-51.1R	0.04	65	88	1.4	40	0.2951	0.83	29.08	2.1	0.715	1.9	0.916	3476	51	3445	13	-1
J2302-52.1RC	0.02	365	349	0.99	234	0.3296	0.35	33.88	1.7	0.745	1.6	0.978	3591	45	3615.4	5.4	1
J2302-53.1R	--	72	103	1.47	43.4	0.2967	0.71	28.59	2	0.699	1.9	0.935	3417	50	3453	11	1
J2302-54.1R	0.1	71	100	1.46	43.6	0.2968	0.68	29.22	2	0.714	1.9	0.94	3474	51	3453	11	-1
J2302-55.1R	0.19	77	104	1.4	39	0.2914	0.76	23.78	2	0.592	1.9	0.926	2997	45	3425	12	12
J2302-56.1MA	0.23	277	111	0.41	126	0.3414	0.44	24.88	1.7	0.5285	1.7	0.967	2735	37	3668.9	6.7	25
J2302-57.1RC	0.52	41	21	0.53	27.7	0.3734	1.3	39.88	2.4	0.775	2.1	0.841	3697	58	3805	20	3
J2302-57.2RC	0.15	417	106	0.26	158	0.3374	0.61	20.43	1.8	0.439	1.7	0.939	2346	33	3651.2	9.3	36
J2302-58.1R	0.09	182	130	0.74	106	0.2821	0.44	26.27	2.1	0.675	2	0.977	3327	53	3374.8	6.9	1
J2302-59.1RC	0.19	770	380	0.51	484	0.35084	0.27	35.31	1.7	0.73	1.6	0.987	3533	45	3710.7	4.1	5
J2302-60.1RC	0.09	77	49	0.66	50.6	0.3531	0.59	37.21	1.9	0.764	1.9	0.953	3660	52	3720.2	9	2
J2302-61.1R	0.67	88	54	0.63	47.7	0.2722	0.94	23.56	2.1	0.628	1.8	0.89	3140	46	3319	15	5
J2302-61.2RC	1.05	1205	1036	0.89	396	0.298	0.4	15.54	1.7	0.3782	1.7	0.972	2068	29	3460.1	6.2	40
J2302-62.1R	0.05	50	66	1.36	30.4	0.2961	0.75	28.72	2.1	0.703	2	0.935	3433	52	3450	12	0
J2302-63.1R	0.04	67	102	1.56	37.6	0.2889	0.69	25.88	2	0.65	1.9	0.94	3227	48	3412	11	5
J2302-64.1R	0.03	76	91	1.24	42.3	0.2752	0.66	24.62	2	0.649	1.9	0.944	3224	47	3336	10	3
J2302-65.1R	0.11	133	192	1.5	72.1	0.2887	0.53	25.14	1.9	0.631	1.9	0.961	3155	46	3410.7	8.3	7
J2302-66.1RC	--	163	85	0.54	89.4	0.2731	0.48	24.11	1.8	0.64	1.8	0.964	3190	44	3324.2	7.6	4
J2302-67.1MA	0.22	247	378	1.58	99.5	0.3433	0.43	22.18	1.8	0.4685	1.7	0.969	2477	35	3677.5	6.6	33
Trondhjemitic gneiss (J2303)
J2303-1.1RC	0.33	41	26	0.65	27.1	0.3861	0.79	40.37	2.2	0.758	2	0.932	3638	57	3856	12	6
J2303-2.1MA	1.66	55	22	0.41	37.4	0.4093	0.83	43.64	2.1	0.773	1.9	0.92	3693	55	3944	12	6
J2303-3.1MA	0.03	58	43	0.76	42.6	0.413	0.63	49.11	2	0.862	1.9	0.95	4009	57	3957.2	9.4	-1
J2303-4.1MA	0.02	85	67	0.81	62.5	0.4111	0.57	48.27	1.9	0.852	1.8	0.955	3971	54	3950.3	8.5	-1
J2303-5.1MA	0.07	70	44	0.65	52.1	0.4125	0.58	49.1	2.6	0.862	2.6	0.975	4009	76	3955.4	8.6	-1
J2303-6.1MA	0	100	88	0.91	75	0.4147	0.5	50.05	1.9	0.875	1.8	0.963	4053	54	3963.1	7.5	-2
J2303-7.1MA	0.05	85	35	0.43	61.3	0.401	0.64	46.54	1.9	0.842	1.8	0.944	3937	54	3912.9	9.6	-1
J2303-8.1MA	--	50	31	0.64	36.7	0.408	0.72	48.1	2.1	0.855	2	0.939	3983	58	3939	11	-1
J2303-9.1MA	0.17	491	226	0.48	315	0.3765	0.33	38.74	1.7	0.746	1.6	0.98	3594	45	3817.6	5	6
J2303-10.1MA	3.37	70	53	0.78	52.7	0.4122	1.1	48.3	2.2	0.851	1.9	0.869	3968	57	3954	16	0
J2303-11.1MA	0.32	431	343	0.82	221	0.3535	0.35	29.03	1.7	0.596	1.7	0.979	3012	41	3722.1	5.4	19
J2303-12.1R	0.4	1417	288	0.21	343	0.2666	0.37	10.31	1.6	0.2805	1.6	0.975	1594	23	3286.1	5.7	51
J2303-13.1MA	0.17	36	19	0.54	26.2	0.403	0.78	46.8	2.2	0.843	2.1	0.936	3940	62	3920	12	0
J2303-14.1MA	0.31	207	119	0.6	125	0.382	0.45	36.87	1.8	0.7	1.7	0.968	3421	46	3839.6	6.7	11
J2303-15.1MA	0.33	95	72	0.78	68.4	0.4016	0.54	46.17	1.9	0.834	1.8	0.958	3909	53	3915.1	8.1	0
J2303-16.1MA	0.1	69	49	0.74	50.7	0.4142	0.59	48.7	2.1	0.852	2	0.959	3972	59	3961.5	8.8	0
J2303-17.1MA	0.01	66	45	0.71	48	0.4067	0.59	47.3	2	0.844	1.9	0.954	3944	56	3933.9	8.9	0
J2303-18.1R	1.58	409	889	2.25	164	0.2632	0.6	16.66	1.8	0.459	1.7	0.943	2435	35	3265.9	9.5	25
J2303-19.1MA	0.05	383	186	0.5	202	0.3586	0.36	30.39	1.7	0.614	1.6	0.976	3088	40	3744.1	5.5	18
J2303-20.1MA	1.53	640	256	0.41	221	0.3362	0.47	18.33	1.8	0.3956	1.7	0.963	2149	31	3645.4	7.2	41
J2303-21.1MA	0	54	36	0.69	37.4	0.4002	0.72	44.56	2.1	0.807	1.9	0.938	3816	56	3910	11	2
J2303-22.1RC	0.64	1232	232	0.19	193	0.2232	0.74	5.57	1.8	0.1809	1.7	0.915	1072	16	3004	12	64
J2303-23.1MA	0.5	672	323	0.5	310	0.3245	0.4	23.86	1.7	0.5334	1.7	0.973	2756	38	3591.1	6.1	23
J2303-24.1RC	0.06	585	269	0.47	272	0.3638	0.34	27.1	1.7	0.5402	1.6	0.979	2784	37	3765.9	5.1	26
J2303-25.1MA	0.94	1167	609	0.54	197	0.241	0.5	6.47	1.7	0.1947	1.7	0.959	1147	18	3126.4	7.9	63
J2303-25.2RC	0.86	419	121	0.3	115	0.2472	0.56	10.83	1.8	0.3178	1.7	0.95	1779	27	3166.8	8.9	44
J2303-26.1R	0.14	610	409	0.69	276	0.25937	0.38	18.81	1.7	0.5259	1.6	0.973	2724	36	3242.9	6	16
J2303-27.1RC	0.4	276	76	0.28	104	0.2547	0.57	15.31	1.8	0.4361	1.7	0.95	2333	34	3214	9	27
J2303-28.1MA	0.23	724	257	0.37	256	0.3101	0.34	17.52	1.7	0.4097	1.7	0.98	2214	32	3521.2	5.3	37
J2303-29.1RC	2.49	1656	1288	0.8	520	0.3168	0.58	15.57	1.8	0.3564	1.7	0.944	1965	28	3554.2	9	45
J2303-30.1MA	0.12	631	307	0.5	170	0.2963	0.4	12.84	1.8	0.3144	1.7	0.974	1762	26	3450.8	6.1	49
J2303-31.1MA	0.08	97	33	0.35	67.6	0.4044	0.54	45.15	1.9	0.81	1.8	0.959	3824	52	3925.6	8.1	3
J2303-32.1RC	0.76	277	110	0.41	120	0.3172	0.49	21.89	1.8	0.5005	1.8	0.963	2616	38	3556.5	7.6	26
J2303-33.1MA	4.2	843	516	0.63	192	0.2651	1.3	9.28	2.1	0.254	1.7	0.811	1459	23	3277	20	55
J2303-34.1MA	3.77	625	388	0.64	182	0.2996	0.95	13.45	2	0.3256	1.7	0.877	1817	27	3468	15	48
J2303-35.1MA	6.72	1965	1974	1.04	175	0.1883	3.5	2.511	3.9	0.0968	1.8	0.469	595	10	2727	57	78
J2303-36.1MA	0.04	184	178	1	130	0.4062	0.55	45.96	1.8	0.821	1.7	0.952	3863	49	3932.1	8.2	2
J2303-37.1RC	0.01	120	96	0.83	84.5	0.399	0.5	45.26	1.8	0.823	1.8	0.962	3870	52	3905.2	7.5	1
J2303-38.1MA	0.3	465	166	0.37	274	0.3737	0.35	35.3	1.7	0.685	1.6	0.977	3364	43	3806.6	5.4	12
J2303-39.1MA	0.22	585	268	0.47	197	0.3153	0.37	17.02	1.7	0.3916	1.7	0.977	2130	31	3547.1	5.7	40
J2303-40.1MA	0.81	974	354	0.38	173	0.235	0.6	6.66	1.8	0.2055	1.7	0.941	1205	19	3086.7	9.6	61
J2303-41.1MA	0.13	331	154	0.48	176	0.3883	0.55	33.19	1.9	0.62	1.8	0.959	3110	46	3864.2	8.3	20
J2303-42.1RC	0.1	320	88	0.28	221	0.385	0.39	42.74	1.7	0.805	1.7	0.974	3808	48	3851.5	5.8	1
J2303-43.1MA	0.6	545	379	0.72	197	0.316	0.38	18.26	1.7	0.4191	1.7	0.975	2256	32	3550.3	5.9	36
J2303-44.1MA	0.22	734	458	0.64	200	0.2816	0.39	12.28	1.7	0.3162	1.7	0.974	1771	26	3372	6.1	47
J2303-45.1MA	0.52	623	151	0.25	203	0.2689	0.4	13.97	1.7	0.3767	1.7	0.973	2061	30	3299.5	6.3	38
J2303-46.1MA	0.25	214	197	0.95	145	0.4039	0.41	43.88	1.7	0.788	1.7	0.972	3746	48	3923.6	6.1	5
J2303-47.1MA	0.03	71	44	0.64	51.7	0.4069	0.59	47.43	2	0.845	1.9	0.954	3950	56	3934.6	8.9	0
J2303-48.1MA	0.16	433	120	0.29	194	0.3556	0.35	25.51	1.7	0.5203	1.7	0.979	2700	37	3731.4	5.4	28
J2303-49.1MA	0.11	1008	164	0.17	318	0.3008	0.36	15.22	1.7	0.367	1.7	0.978	2015	29	3474.6	5.5	42
J2303-50.1MA	0.37	331	134	0.42	183	0.3513	0.44	31.05	1.8	0.641	1.7	0.969	3193	43	3712.6	6.7	14
J2303-51.1MA	0.46	865	107	0.13	218	0.2357	0.42	9.49	1.7	0.2919	1.7	0.97	1651	25	3091	6.8	47
J2303-52.1MA	0.36	883	86	0.1	204	0.20881	0.43	7.7	1.7	0.2676	1.7	0.969	1528	23	2896.3	6.9	47
J2303-53.1R	1.01	1073	86	0.08	240	0.2072	0.54	7.36	1.8	0.2578	1.7	0.953	1479	22	2883.7	8.7	49
J2303-54.1RC	0.2	1082	57	0.05	290	0.27466	0.36	11.78	1.7	0.3111	1.7	0.978	1746	26	3332.9	5.6	48
J2303-55.1MA	1.62	2135	1862	0.9	348	0.2624	2	6.75	2.7	0.1867	1.8	0.665	1103	18	3261	31	66
J2303-56.1MA	0.1	661	514	0.8	220	0.3122	0.37	16.62	1.7	0.3862	1.7	0.977	2105	31	3531.7	5.7	40
J2303-57.1MA	0.1	515	297	0.6	212	0.3288	0.37	21.69	1.7	0.4785	1.7	0.978	2521	36	3611.7	5.7	30
J2303-58.1MA	0.12	850	147	0.18	212	0.2719	0.54	10.89	1.8	0.2904	1.7	0.952	1644	25	3316.9	8.5	50
J2303-59.1R	0.3	701	27	0.04	105	0.1887	1.6	4.53	2.4	0.174	1.8	0.745	1034	17	2731	26	62
J2303-59.2RC	0.2	460	41	0.09	191	0.2591	0.42	17.24	1.8	0.4826	1.7	0.972	2538	36	3241.4	6.6	22
J2303-60.1MA	2.36	526	695	1.36	168	0.2883	0.74	14.44	1.9	0.3631	1.7	0.921	1997	30	3409	11	41
J2303-61.1R	0.01	564	135	0.25	288	0.27992	0.34	22.92	1.7	0.594	1.7	0.981	3005	41	3362.5	5.3	11
J2303-62.1RC	0.55	905	79	0.09	235	0.2425	0.43	10.03	1.8	0.3	1.7	0.969	1691	25	3136.5	6.9	46
J2303-63.1RC	0.68	1103	654	0.61	246	0.2644	0.43	9.38	1.8	0.2574	1.7	0.969	1476	22	3273.1	6.8	55
J2303-64.1MA	0.65	667	118	0.18	116	0.1928	0.62	5.356	1.8	0.2015	1.7	0.941	1184	19	2766	10	57
J2303-65.1MA	0.1	1248	828	0.69	499	0.3383	0.36	21.68	1.7	0.4648	1.7	0.978	2461	35	3655	5.5	33
J2303-66.1MA	0.39	742	525	0.73	293	0.3262	0.36	20.57	1.7	0.4574	1.7	0.978	2428	35	3599.6	5.5	33
J2303-67.1MA	0.03	131	80	0.63	93.7	0.4109	0.8	47.19	1.9	0.833	1.7	0.908	3906	51	3950	12	1
J2303-68.1R	0.33	893	83	0.1	182	0.2169	1.1	7.09	2	0.2371	1.7	0.836	1372	21	2958	18	54
J2303-69.1R	0.5	949	102	0.11	157	0.2394	0.62	6.33	1.8	0.1919	1.7	0.939	1132	18	3115.7	9.9	64
J2303-70.1MA	0.53	845	714	0.87	176	0.3063	0.42	10.2	1.7	0.2416	1.7	0.971	1395	21	3502.3	6.4	60
Banded trondhjemitic gneiss (J2212)
J2212A-1.1RC	0.48	1284	642	0.52	518	0.3142	0.42	20.25	1.7	0.4674	1.6	0.969	2472	34	3541.9	6	30
J2212A-2.1MA f	0.08	114	113	1.03	81.5	0.4143	0.58	47.38	1.9	0.829	1.8	0.952	3894	53	3961.8	8.7	2
J2212A-2.2RC	0.72	538	173	0.33	213	0.3272	0.7	20.64	1.9	0.4575	1.8	0.934	2429	37	3604	11	33
J2212A-2.3MA	0.11	109	101	0.95	76.8	0.4119	0.65	46.51	2	0.819	1.9	0.946	3856	54	3953.2	9.7	2
J2212A-3.1RC	0.21	185	128	0.71	120	0.3956	0.52	41.1	1.8	0.754	1.7	0.957	3620	48	3892.4	7.8	7
J2212A-4.1MA	0.13	524	212	0.42	317	0.3916	0.38	37.95	1.7	0.703	1.6	0.974	3432	43	3877.1	5.7	11
J2212A-4.2MA	0.1	319	106	0.34	189	0.3827	0.44	36.35	1.7	0.689	1.7	0.967	3378	43	3842.6	6.6	12
J2212A-5.1MA	0.08	344	186	0.56	223	0.4029	0.42	41.86	1.7	0.754	1.7	0.97	3620	46	3920	6.3	8
J2212A-5.2MA	0.9	978	396	0.42	214	0.2739	0.75	9.54	2	0.2525	1.8	0.926	1451	24	3329	12	56
J2212A-6.1MA	0.23	605	199	0.34	416	0.3518	0.36	38.71	1.7	0.798	1.6	0.975	3782	46	3714.8	5.6	-2
J2212A-6.2MA	0.28	611	210	0.36	407	0.3512	0.4	37.44	1.7	0.773	1.7	0.973	3692	47	3712.2	6	1
J2212A-7.1MA	0.77	3037	1525	0.52	834	0.3158	0.36	13.81	1.6	0.3171	1.6	0.974	1775	24	3549.7	5.6	50
J2212A-8.1RC	4.03	2421	1016	0.43	198	0.1054	3	1.328	3.5	0.0913	1.8	0.507	563.5	9.5	1722	55	67
J2212A-9.1RC	0.17	202	125	0.64	133	0.3841	0.5	40.51	1.8	0.765	1.7	0.958	3662	47	3847.9	7.6	5
J2212A-10.1MA	0.68	1018	123	0.13	264	0.2248	0.52	9.3	1.7	0.3001	1.6	0.951	1692	24	3015.3	8.3	44
J2212A-11.1RC	0.53	952	313	0.34	502	0.3143	0.84	26.46	2.2	0.611	2	0.921	3072	48	3542	13	13
J2212A-12.1MA	0.03	90	79	0.9	66.5	0.4126	0.89	49	2.4	0.862	2.2	0.926	4006	66	3955	13	-1
J2212A-12.2MA	0.14	82	69	0.87	58.4	0.4077	0.68	46.25	2	0.823	1.9	0.942	3870	55	3938	10	2
J2212A-12.3MA	0.03	86	71	0.85	62.4	0.413	0.69	48.01	2.1	0.843	1.9	0.943	3941	57	3957	10	0
J2212A-12.4RC	0.11	87	49	0.58	64.8	0.4153	0.85	49.6	2.1	0.865	1.9	0.915	4020	57	3965	13	-1
J2212A-13.1MA	0.06	336	306	0.94	232	0.375	0.4	41.45	1.7	0.802	1.6	0.971	3795	47	3811.8	6.1	0
J2212A-13.2RC	0.4	776	322	0.43	314	0.3171	0.44	20.5	1.7	0.4689	1.6	0.965	2479	34	3556	6.8	30
J2212A-14.1RC	0.39	1444	2318	1.66	711	0.3578	0.51	28.17	1.8	0.5711	1.7	0.96	2912	41	3740.4	7.7	22
J2212A-15.1MA	0.1	440	483	1.14	280	0.3779	0.39	38.66	1.7	0.742	1.6	0.973	3577	44	3823.5	5.9	6
J2212A-16.1RC	0.2	1205	595	0.51	637	0.3206	0.34	27.16	1.6	0.6143	1.6	0.978	3087	39	3572.9	5.2	14
J2212A-17.1RC	0.56	737	254	0.36	407	0.3403	0.4	30.03	1.7	0.64	1.6	0.97	3189	41	3664.1	6.1	13
J2212A-18.1RC	0.83	473	119	0.26	157	0.2574	0.64	13.6	1.7	0.3832	1.6	0.929	2091	29	3231	10	35
J2212A-19.1RC	0.59	912	645	0.73	352	0.3296	0.44	20.27	1.7	0.4459	1.6	0.966	2377	32	3615.4	6.7	34
J2212A-20.1RC	0.35	1151	729	0.66	498	0.3241	0.39	22.43	1.7	0.502	1.6	0.972	2622	35	3589.4	6	27
J2212A-21.1RC	0.67	859	561	0.68	259	0.2489	0.66	11.98	1.9	0.3493	1.7	0.935	1931	29	3178	10	39
J2212A-22.1RC	1.46	1337	159	0.12	291	0.2456	0.87	8.46	1.8	0.2499	1.6	0.882	1438	21	3157	14	54
J2212A-23.1RC	0.19	1107	567	0.53	611	0.3307	0.32	29.26	1.6	0.6417	1.5	0.979	3196	39	3620.5	4.9	12
J2212A-24.1MA	1.19	2130	821	0.4	465	0.2633	0.47	9.12	1.6	0.2513	1.5	0.956	1445	20	3266.5	7.4	56
J2212A-25.1RC	0.94	1156	151	0.13	419	0.2759	0.45	15.91	1.6	0.4181	1.6	0.961	2252	30	3340	7	33
J2212A-26.1RC	0.85	1866	472	0.26	486	0.2644	0.57	10.95	1.8	0.3004	1.7	0.95	1694	26	3273.4	8.9	48
J2212A-27.1MA	0.14	237	89	0.39	152	0.3761	0.47	38.7	1.7	0.746	1.7	0.962	3594	46	3816.4	7.1	6
J2212A-28.1RC	1.27	742	1111	1.55	183	0.2972	0.78	11.65	1.9	0.2842	1.8	0.915	1613	25	3456	12	53
J2212A-29.1MA	0.09	254	193	0.78	168	0.4088	0.43	43.22	1.7	0.767	1.7	0.967	3669	46	3941.8	6.5	7
J2212A-30.1RC	0.71	984	345	0.36	337	0.3009	0.54	16.41	1.7	0.3956	1.6	0.95	2149	30	3475.1	8.4	38
J2212A-31.1RC	1.96	681	1008	1.53	188	0.3009	0.68	13.04	1.7	0.3144	1.6	0.92	1763	25	3475	11	49
J2212A-32.1RC	0.69	1020	409	0.41	338	0.3067	0.41	16.22	1.6	0.3836	1.6	0.967	2093	28	3504.2	6.4	40
J2212A-33.1RC	0.37	700	222	0.33	288	0.3028	0.41	19.93	1.6	0.4773	1.6	0.968	2515	33	3484.6	6.3	28
J2212A-34.1MA	0.06	151	129	0.88	101	0.3728	0.53	40.1	1.8	0.78	1.7	0.956	3718	49	3802.8	8.1	2
J2212A-34.2MA	0.17	383	475	1.28	227	0.3598	0.42	34.23	1.7	0.69	1.6	0.968	3383	42	3749	6.3	10
J2212A-35.1MA	0.37	1376	919	0.69	598	0.3205	0.35	22.29	1.6	0.5044	1.6	0.977	2633	34	3572	5.3	26
J2212A-36.1RC	0.21	1103	517	0.48	470	0.3066	0.36	20.9	1.6	0.4944	1.6	0.975	2590	34	3503.8	5.6	26
J2212A-37.1RC	0.44	966	342	0.37	298	0.2987	0.47	14.74	1.7	0.358	1.6	0.959	1972	27	3463.4	7.3	43
J2212A-38.1MA	0.14	770	344	0.46	388	0.3277	0.35	26.42	1.6	0.5848	1.6	0.976	2968	37	3606.5	5.4	18
J2212A-39.1RC	0.19	1371	961	0.72	774	0.3258	0.42	29.47	1.6	0.656	1.6	0.965	3252	40	3597.5	6.5	10
J2212A-40.1RC	1.16	846	185	0.23	430	0.3035	0.46	24.46	1.6	0.5846	1.6	0.961	2967	38	3488.1	7.1	15
J2212A-41.1RC	2.88	1125	117	0.11	470	0.2731	0.83	17.79	1.8	0.4724	1.6	0.889	2494	33	3324	13	25
J2212A-42.1RC	0.37	1318	549	0.43	531	0.3095	0.35	19.94	1.6	0.4672	1.6	0.975	2471	32	3518.5	5.5	30
J2212A-43.1RC	0.58	1255	331	0.27	418	0.2807	0.41	14.9	1.6	0.3851	1.6	0.968	2100	28	3366.7	6.3	38
J2212A-44.1RC	0.12	1062	1145	1.11	710	0.3484	0.32	37.31	1.6	0.777	1.6	0.98	3705	44	3700	4.9	0
J2212B-1.1RC g	0.09	78	60	0.79	56.6	0.4099	0.5	47.96	1.4	0.849	1.3	0.93	3961	38	3945.8	7.5	0
J2212B-1.2RC	0.07	93	67	0.75	67.2	0.412	0.61	47.65	1.7	0.839	1.5	0.931	3927	46	3953.4	9.1	1
J2212B-2.1RC	0.18	437	379	0.9	256	0.32404	0.3	30.47	0.9	0.6819	0.85	0.943	3352	22	3589.1	4.6	7
J2212B-2.2R	0.55	2080	143	0.07	706	0.2934	0.26	15.9	0.83	0.393	0.79	0.95	2137	14	3435.7	4.1	38
J2212B-3.1RC	0.68	608	229	0.39	241	0.3154	0.43	19.91	1.1	0.4578	1	0.923	2430	21	3547.6	6.6	32
J2212B-4.1RC	0.46	524	204	0.4	211	0.3304	0.33	21.28	0.91	0.4671	0.85	0.93	2471	17	3618.9	5.1	32
J2212B-5.1MA	0.01	132	103	0.81	96.3	0.4144	0.4	48.39	1.7	0.847	1.7	0.972	3955	49	3962	6	0
J2212B-5.2RC	0.37	446	197	0.46	225	0.3496	0.29	28.24	0.72	0.586	0.66	0.917	2973	16	3705.1	4.4	20
J2212B-6.1RC	0.19	62	26	0.44	45.1	0.4124	0.69	48.03	1.5	0.845	1.3	0.881	3948	38	3955	10	0
J2212B-6.2MA	0.16	174	83	0.49	111	0.4021	0.96	41.17	1.3	0.7426	0.82	0.647	3580	22	3917	14	9
J2212B-7.1MA	1.14	536	157	0.3	222	0.3319	0.41	21.83	0.94	0.4769	0.84	0.898	2514	18	3626.1	6.3	31
J2212B-7.2R	2.04	701	28	0.04	176	0.2294	0.74	9.054	0.99	0.2863	0.66	0.668	1622.9	9.5	3048	12	47
J2212B-8.1RC	0.36	183	110	0.62	98.8	0.3611	0.42	31.24	1.1	0.6276	0.97	0.917	3140	24	3754.3	6.4	16
J2212B-9.1RC	0.94	720	409	0.59	210	0.3214	0.58	14.93	1	0.3368	0.83	0.818	1871	13	3576.6	8.9	48
J2212B-10.1MA	0.3	144	92	0.66	79.3	0.3659	0.46	32.27	1.1	0.6397	1	0.911	3188	25	3774.4	7	16
J2212B-11.1MA	0.32	273	108	0.41	155	0.3741	0.63	34.06	1.1	0.6603	0.91	0.819	3268	23	3808.2	9.6	14
J2212B-11.2MA	0.07	143	111	0.81	80.1	0.3785	0.47	34.11	1.1	0.6535	0.97	0.9	3242	25	3825.9	7.1	15
J2212B-11.3RC	0.96	536	183	0.35	193	0.3151	0.6	18.03	0.93	0.415	0.71	0.765	2238	13	3546	9.3	37
J2212B-12.1MA	0.12	149	61	0.42	102	0.3859	0.78	42.27	1.3	0.7945	1	0.788	3769	28	3855	12	2
J2212B-12.2MA	0.21	112	36	0.34	69.6	0.4044	0.81	40.18	1.3	0.7206	0.98	0.77	3498	27	3925	12	11
J2212B-13.1RC	0.4	762	237	0.32	229	0.291	0.34	13.99	0.9	0.3486	0.83	0.927	1928	14	3423	5.3	44
J2212B-13.2MA	0.07	87	53	0.63	56.7	0.4045	0.47	42.06	1.6	0.754	1.6	0.957	3623	43	3925.9	7.1	8
J2212B-14.1MA	1.2	551	411	0.77	164	0.3017	0.47	14.19	0.98	0.3412	0.86	0.876	1892	14	3478.8	7.3	46
J2212B-14.2RC	0.52	516	138	0.28	194	0.2638	0.39	15.85	0.94	0.4358	0.85	0.908	2332	17	3269.8	6.2	29
J2212B-15.1RC	1.28	1753	1052	0.62	342	0.2772	0.45	8.58	0.92	0.2245	0.8	0.872	1305.4	9.5	3347.4	7	61
J2212B-16.1RC	0.69	383	287	0.77	163	0.3467	0.37	23.48	0.94	0.4912	0.87	0.918	2576	18	3692.4	5.7	30
J2212B-17.1RC	0.73	432	97	0.23	228	0.3158	0.35	26.53	0.92	0.6092	0.85	0.923	3067	21	3549.6	5.4	14
J2212B-18.1RC	1.63	1211	115	0.1	311	0.2631	0.52	10.67	0.96	0.294	0.81	0.843	1661	12	3265.6	8.1	49
J2212B-19.1RC	0.18	68	33	0.51	38.8	0.2879	0.7	26.54	1.4	0.6684	1.2	0.867	3300	31	3407	11	3
J2212B-19.2R	0.07	221	12	0.06	131	0.2895	0.38	27.53	0.88	0.6897	0.79	0.902	3381	21	3414.7	5.9	1
J2212B-20.1R	1.25	997	32	0.03	237	0.2242	1.4	8.45	1.6	0.2733	0.87	0.528	1558	12	3011	22	48
J2212B-21.1MA	0.77	919	359	0.4	281	0.3216	0.33	15.64	0.87	0.3527	0.81	0.927	1948	14	3577.5	5	46
J2212B-22.1RC	0.12	403	171	0.44	208	0.3535	0.54	29.28	1	0.6007	0.86	0.846	3033	21	3722.4	8.3	19
J2212B-23.1RC	0.77	392	141	0.37	204	0.3516	0.35	29.13	0.93	0.6009	0.87	0.927	3033	21	3714	5.4	18
J2212B-24.1MA	0.71	448	175	0.4	167	0.3016	1.1	17.9	1.4	0.4303	0.86	0.614	2307	17	3479	17	34
J2212B-25.1MA	0.19	264	96	0.38	152	0.3777	0.34	34.87	0.96	0.6697	0.9	0.935	3305	23	3822.6	5.2	14
J2212B-26.1RC	0.18	639	396	0.64	260	0.3335	0.29	21.71	0.88	0.4721	0.83	0.944	2493	17	3633.2	4.4	31
J2212B-27.1RC	0.28	62	82	1.37	33.8	0.2929	0.77	25.36	1.5	0.628	1.3	0.859	3142	32	3433	12	8
J2212B-28.1R	2.22	572	46	0.08	191	0.2556	0.73	13.38	1.1	0.3796	0.86	0.763	2075	15	3220	11	36
J2212B-29.1RC	0.27	783	114	0.15	359	0.32645	0.26	23.96	0.85	0.5324	0.81	0.951	2751	18	3600.5	4.1	24
J2212B-30.1MA	0.62	545	381	0.72	237	0.3099	0.34	21.53	0.9	0.5038	0.84	0.927	2630	18	3520.4	5.2	25
J2212B-30.2RC	0.32	220	109	0.51	119	0.2751	0.43	23.78	0.89	0.627	0.78	0.878	3138	19	3335.1	6.7	6
J2212B-31.1RC	1.36	420	415	1.02	202	0.3473	0.42	26.52	0.96	0.554	0.86	0.898	2842	20	3695	6.5	23
J2212B-32.1MA	0.01	267	225	0.87	188	0.3835	1.5	43.25	1.9	0.818	1.1	0.572	3853	31	3845	23	0
J2212B-32.2MA	0.12	225	84	0.38	131	0.32	0.71	30.03	1	0.6806	0.77	0.736	3347	20	3570	11	6
J2212B-33.1R	0.3	992	53	0.06	222	0.2375	0.57	8.495	0.99	0.2595	0.81	0.819	1487	11	3103.1	9.1	52
J2212B-34.1MA	0.01	239	231	1	166	0.377	1.2	42.07	1.6	0.8093	0.99	0.629	3822	29	3820	18	0
J2212B-34.2MA	0.09	261	255	1.01	177	0.3642	0.63	39.64	1	0.7893	0.78	0.777	3751	22	3767.6	9.6	0
J2212B-35.1MA	0.26	276	97	0.36	133	0.2783	0.5	21.44	1	0.5588	0.9	0.874	2862	21	3353.3	7.8	15
J2212B-36.1RC	0.03	219	113	0.54	122	0.2851	0.39	25.45	1	0.6473	0.92	0.922	3218	23	3391.2	6.1	5
J2212B-37.1R	1.19	1052	66	0.07	300	0.2464	0.45	11.12	0.93	0.3274	0.81	0.873	1826	13	3161.7	7.2	42
J2212B-38.1RC	0.21	204	53	0.27	130	0.3899	0.84	39.68	1.3	0.7381	0.95	0.75	3563	26	3871	13	8
J2212B-39.1RC	0.3	470	173	0.38	234	0.3452	0.31	27.5	0.91	0.5777	0.85	0.941	2940	20	3685.8	4.7	20
J2212B-40.1RC	0.39	571	265	0.48	193	0.3158	0.58	17.08	1	0.3923	0.84	0.825	2134	15	3549.7	8.9	40
J2212B-41.1RC	0.23	298	93	0.32	158	0.2843	0.39	24.22	0.98	0.6178	0.9	0.916	3101	22	3387	6.1	8
J2212B-42.1RC	1.33	807	72	0.09	213	0.2505	0.51	10.48	0.97	0.3034	0.83	0.85	1708	12	3187.7	8.1	46
J2212B-43.1MA	4.04	1013	68	0.07	199	0.1885	1.5	5.692	1.7	0.2191	0.86	0.497	1277	10	2729	25	53
J2212B-44.1R	0.94	978	70	0.07	209	0.2229	0.48	7.571	0.95	0.2463	0.82	0.861	1420	10	3001.9	7.8	53
J2212B-45.1RC	0.51	429	203	0.49	225	0.2843	0.37	23.83	0.94	0.6079	0.86	0.919	3062	21	3386.8	5.8	10
J2212B-46.1RC	1.26	808	546	0.7	267	0.3067	0.41	16.08	0.92	0.3803	0.83	0.896	2078	15	3504.5	6.3	41
J2212B-47.1RC	0.99	718	238	0.34	237	0.3082	0.39	16.19	1.2	0.381	1.1	0.944	2081	20	3511.9	6	41
J2212B-48.1RC	0.93	634	505	0.82	211	0.3197	0.39	16.92	0.93	0.3839	0.84	0.909	2094	15	3568.3	6	41
J2212B-49.1RC	0.94	398	115	0.3	143	0.3318	0.45	18.95	0.99	0.4142	0.88	0.892	2234	17	3625.5	6.9	38
J2212B-50.1MA	0.47	521	287	0.57	186	0.3156	0.35	17.99	0.91	0.4134	0.84	0.924	2230	16	3548.4	5.4	37
J2212B-51.1RC	0.1	66	75	1.18	37.2	0.2833	1	25.73	1.9	0.659	1.6	0.843	3262	40	3381	16	4
J2212B-52.1MA	0.45	489	115	0.24	185	0.3284	0.7	19.92	1.1	0.4398	0.85	0.77	2350	17	3610	11	35
J2212B-53.1R	0.21	451	15	0.04	232	0.27981	0.32	23.08	0.91	0.5981	0.85	0.936	3022	21	3361.9	5	10
J2212B-54.1RC	0.41	221	78	0.37	109	0.2778	0.48	21.9	1.1	0.5718	0.96	0.895	2915	22	3350.4	7.5	13
J2212B-55.1RC	1.11	645	124	0.2	232	0.2933	0.72	16.72	1.1	0.4135	0.85	0.76	2231	16	3435	11	35
J2212B-56.1RC	0.25	937	586	0.65	319	0.31658	0.28	17.26	0.87	0.3954	0.83	0.946	2148	15	3553.3	4.4	40
J2212B-57.1RC	0.7	491	70	0.15	154	0.2501	0.48	12.48	0.99	0.3619	0.87	0.873	1991	15	3185.1	7.7	37
J2212B-58.1MA	0.5	1287	1195	0.96	256	0.27857	0.35	8.85	0.89	0.2304	0.82	0.919	1336.6	9.9	3355	5.5	60
J2212B-59.1RC	1.39	727	191	0.27	267	0.3133	0.47	18.2	0.96	0.4212	0.84	0.873	2266	16	3537.2	7.3	36
J2212B-60.1RC	1.04	966	110	0.12	247	0.2135	0.5	8.675	0.96	0.2947	0.82	0.856	1665	12	2932.3	8.1	43
J2212B-60.2R	1.2	1370	40	0.03	268	0.1948	0.56	6.053	0.99	0.2254	0.81	0.823	1310.5	9.6	2782.8	9.2	53
J2212B-61.1RC	0.96	820	426	0.54	193	0.2688	0.75	10.08	1.1	0.2719	0.84	0.746	1551	12	3299	12	53
J2212B-62.1R	0.31	491	23	0.05	173	0.23894	0.41	13.48	0.96	0.4091	0.87	0.904	2211	16	3112.9	6.5	29
J2212B-63.1MA	0.01	47	19	0.43	34.6	0.4218	0.64	50.33	1.5	0.865	1.4	0.907	4019	42	3988.5	9.6	-1
J2212B-63.2MA	1.5	683	249	0.38	198	0.2742	0.52	12.55	0.83	0.3319	0.65	0.78	1848	10	3330.2	8.2	45
J2212B-64.1RC	0.26	730	376	0.53	296	0.3153	0.34	20.46	0.9	0.4706	0.84	0.927	2486	17	3546.9	5.2	30
J2212B-65.1RC	0.92	589	329	0.58	158	0.2487	0.5	10.61	0.99	0.3094	0.86	0.865	1738	13	3176.4	7.9	45
J2212B-66.1RC	0.19	908	762	0.87	356	0.3353	0.27	21.04	0.87	0.455	0.83	0.951	2418	17	3641.5	4.1	34
J2212B-67.1RC	0.12	804	634	0.81	284	0.3422	0.37	19.39	0.92	0.4109	0.84	0.915	2219	16	3672.7	5.6	40
J2212B-68.1RC	0.2	95	97	1.05	46.2	0.2904	0.99	22.54	1.9	0.5629	1.7	0.86	2879	39	3420	15	16
J2212B-69.1RC	0.12	294	108	0.38	158	0.2733	0.81	23.55	1.2	0.6249	0.92	0.753	3129	23	3325	13	6
J2212B-70.1RC	1.15	499	243	0.5	179	0.2627	0.52	14.91	1	0.4117	0.88	0.86	2223	16	3262.8	8.2	32
J2212B-71.1RC	0.27	790	228	0.3	297	0.2884	0.38	17.37	0.92	0.4369	0.83	0.908	2337	16	3409	6	31
J2212B-72.1MA	0.18	144	123	0.88	82.8	0.3775	0.49	34.69	1.2	0.6664	1.1	0.908	3292	27	3822	7.3	14
J2212B-73.1RC	0.65	1003	663	0.68	443	0.33026	0.29	23.24	0.87	0.5105	0.82	0.943	2659	18	3618.3	4.4	27
J2212B-74.1RC	1.06	1172	454	0.4	409	0.317	0.35	17.55	0.89	0.4014	0.82	0.92	2175	15	3555.4	5.4	39
J2212B-75.1R	3.94	576	26	0.05	154	0.2187	1.3	9	1.6	0.2984	0.89	0.571	1683	13	2971	21	43
J2212B-76.1MA	0.74	804	410	0.53	219	0.23644	0.42	10.267	0.93	0.3149	0.83	0.893	1765	13	3096.2	6.7	43
J2212B-77.1R	1.16	1207	80	0.07	241	0.2044	0.6	6.457	1	0.2292	0.81	0.804	1330.2	9.7	2861.3	9.7	54
J2212B-78.1MA	0.43	330	150	0.47	149	0.2699	0.45	19.44	1	0.5224	0.89	0.892	2709	20	3305.5	7.1	18
J2212B-79.1RC	0.39	370	124	0.35	151	0.2525	0.42	16.46	1.2	0.4729	1.1	0.933	2496	22	3200.2	6.6	22
J2212B-80.1RC	0.27	1233	970	0.81	480	0.31494	0.24	19.62	0.83	0.4518	0.8	0.957	2403	16	3545.3	3.7	32
J2212B-81.1RC	0.28	313	109	0.36	142	0.3507	0.37	25.47	0.96	0.5268	0.89	0.924	2728	20	3710.1	5.6	26
J2212B-82.1R	2.15	900	78	0.09	209	0.2309	0.99	8.41	1.3	0.264	0.83	0.642	1510	11	3058	16	51
J2212B-83.1RC	1.01	840	133	0.16	249	0.2823	1.2	13.28	1.4	0.3413	0.82	0.566	1893	13	3375	19	44
J2212B-84.1RC	0.19	181	99	0.57	99.2	0.3639	0.63	32.03	1.2	0.6384	0.99	0.843	3183	25	3766.3	9.6	15
J2212B-84.2MA	0.01	85	50	0.61	62.4	0.4105	0.66	48.21	1.2	0.8517	1	0.841	3972	31	3948	9.9	-1
J2212B-85.1RC	1.19	842	160	0.2	230	0.27	0.46	11.69	0.94	0.3139	0.82	0.874	1760	13	3305.8	7.2	47
J2212B-86.1RC	0.48	475	70	0.15	184	0.3413	0.35	21.05	0.93	0.4473	0.86	0.928	2383	17	3668.7	5.3	35
J2212B-87.1MA	0.13	600	487	0.84	329	0.33642	0.26	29.61	0.87	0.6383	0.83	0.953	3182	21	3646.6	4	13
J2212B-87.2MA	0.08	100	75	0.78	71.1	0.4119	0.44	46.91	1.1	0.8259	0.98	0.913	3881	29	3953.2	6.6	2
J2212B-88.1RC	1.65	621	138	0.23	244	0.3093	0.48	19.18	0.97	0.4498	0.84	0.868	2394	17	3517.4	7.4	32
J2212B-89.1RC	0.23	679	217	0.33	290	0.28547	0.3	19.49	0.88	0.4952	0.83	0.941	2593	18	3393.1	4.6	24
J2212B-90.1RC	0.77	884	279	0.33	247	0.2646	0.39	11.77	0.9	0.3226	0.81	0.904	1803	13	3274.4	6.1	45
J2212B-91.1RC	0.19	396	225	0.59	210	0.3537	0.39	30.03	0.95	0.6157	0.87	0.911	3093	21	3722.9	6	17
J2212B-92.1R	1.7	827	64	0.08	197	0.2357	0.7	8.841	1.1	0.2721	0.83	0.766	1551	11	3091	11	50
J2212B-93.1RC	1.07	982	317	0.33	273	0.2884	0.39	12.76	0.91	0.3208	0.82	0.9	1794	13	3408.9	6.1	47
J2212B-94.1R	0.99	655	33	0.05	201	0.2436	0.47	11.88	0.96	0.3536	0.84	0.871	1952	14	3143.6	7.5	38
J2212B-95.1R	6.48	668	40	0.06	285	0.2498	1.7	15.99	2	0.4645	0.97	0.493	2459	20	3183	27	23
J2212B-96.1MA	1.44	844	649	0.79	279	0.3058	0.46	16.01	0.96	0.3797	0.84	0.879	2075	15	3499.8	7.1	41
J2212B-97.1RC	0.46	452	195	0.45	228	0.3414	0.33	27.57	0.94	0.5856	0.88	0.937	2972	21	3669.1	5	19
J2212B-98.1RC	0.33	848	283	0.34	217	0.263	0.39	10.77	0.94	0.2969	0.85	0.907	1676	13	3264.7	6.2	49
J2212B-99.1R	0.54	490	24	0.05	208	0.247	0.52	16.72	1	0.4909	0.89	0.863	2575	19	3165.5	8.3	19
J2212B-100.1RC	0.27	226	87	0.4	136	0.3726	0.35	35.84	0.83	0.6975	0.75	0.909	3411	20	3802.1	5.2	10
J2212B-101.1RC	0.1	202	131	0.67	132	0.3811	0.33	40.11	0.84	0.7634	0.78	0.922	3657	22	3836.1	4.9	5
J2212B-102.1RC	0.11	79	31	0.4	51.7	0.4087	0.5	43.04	1.2	0.7638	1.1	0.903	3658	29	3941.6	7.5	7
J2212B-103.1R	0.32	737	37	0.05	238	0.2644	0.32	13.676	0.71	0.3751	0.64	0.895	2054	11	3273.1	5	37
J2212B-104.1RC	0.16	51	32	0.65	27.3	0.3981	1.2	34.34	2.1	0.626	1.6	0.796	3133	41	3902	19	20
J2212B-105.1R	1.59	489	18	0.04	184	0.2519	0.6	14.96	0.91	0.4309	0.68	0.751	2310	13	3196.7	9.5	28
J2212B-106.1MA	0.43	838	423	0.52	235	0.2579	0.34	11.571	0.72	0.3254	0.64	0.885	1816	10	3233.9	5.3	44
J2212B-107.1MA	0.34	1081	657	0.63	450	0.32469	0.24	21.64	0.66	0.4834	0.61	0.933	2542	13	3592.2	3.6	29
J2212B-108.1RC	0.13	387	362	0.97	240	0.3671	0.35	36.47	0.79	0.7204	0.71	0.898	3498	19	3779.7	5.2	7
J2212B-109.1RC	0.08	71	53	0.77	49.6	0.3889	0.51	43.47	1.2	0.8108	1.1	0.908	3828	32	3866.6	7.7	1
Notes:
a: MA and RC represent magmatic and recrystallized zircons, respectively, while R represents overgrowth rims or newly-formed grains in metamorphism.
b: 206Pbc represents the percentage of common 206Pb in entire 206Pb.
c: The asterisk (*) represents radiogenic lead.
d: Common lead corrected using measured 204Pb.
e: Discordance (%) is defined as [1- (206Pb/238U age) / (207Pb/206Pb age)] ×100.
f: The analyses highlighted in yellow were used to calculate the weighted mean 207Pb/206Pb age of magmatic crystallization, and the analyses highlighted in gray were used to calculate the weighted mean 207Pb/206Pb age of metamorphic event.
g: Zircons of J2212A and J2212B are separated from the same sample (J2212), with the zircons of J2212B being picked from the remaining heavy mineral concentrate after picking the zircons of J2212A.

## Sheet: Table S2
Table S2 Zircon O isotopic composition of the 3.95 Ga trondhjemitic gneiss in the Labashan area, eastern Hebei, North China Craton
Title	Reject a	δ18O (VSMOW)	Error (1σ)	207Pb/206Pb age (Ma)	Discordance (%)
Mount 1
91500-1	No	9.77366	0.429506
91500-2	No	9.73688	0.179517
91500-3	No	10.1856	0.286823
91500-4	No	10.1241	0.210686
91500-5	No	10.117	0.274546
Trondhjemitic gneiss (J2302)
J2302-1.1MA b	No	6.93475	0.248642	3942	3
J2302-1.2R	No	5.67832	0.281026	3188	12
J2302-2.1MA	No	6.72328	0.255283	3943.5	3
J2302-3.1RC	No	6.2123	0.327039	3947	-1
J2302-4.1RC	No	7.30729	0.285205	3472	-1
J2302-5.1MA	No	6.39094	0.193867	3953.5	1
J2302-7.1MA	No	7.04004	0.267323	3959	0
J2302-9.1R	No	6.90012	0.286841	3395	18
J2302-10.1R	No	6.36642	0.191669	3454	1
J2302-11.1MA	No	6.77795	0.232473	3938.3	2
J2302-12.1R	No	6.73283	0.193854	3434	1
J2302-13.1MA	No	6.66543	0.323898	3959.4	1
J2302-15.1R	No	7.64286	0.214951	3349.6	1
J2302-16.1R	No	6.91202	0.355837	3000	62
J2302-19.1R	No	7.37526	0.280563	3352	14
J2302-20.1R	No	6.78763	0.1705	3431.4	1
J2302-21.1MA	No	6.28009	0.278318	3723.8	32
J2302-21.2MA	No	6.07	0.280711	3584.4	47
J2302-22.1MA	No	5.38098	0.286236	3741.5	13
J2302-23.1MA	No	6.70233	0.238732	3952	0
J2302-24.1R	No	7.21749	0.281023	3466	-2
J2302-25.1MA	No	6.28818	0.237756	3935.1	3
J2302-29.1MA	No	6.40158	0.24416	3942.9	-1
J2302-30.1MA	No	5.9846	0.221183	3959.7	2
J2302-33.1RC	No	4.78503	0.216682	3627.6	6
J2302-39.1RC	No	7.52668	0.251544	3234	46
J2302-41.1RC	No	6.66656	0.208411	3317.6	35
J2302-43.1RC	No	6.44542	0.218841	3907.7	4
J2302-45.1MA	No	5.6835	0.249663	2920.9	62
J2302-48.1R	No	6.85496	0.200615	2888	35
J2302-49.1R	No	6.57639	0.278246	3469	0
J2302-50.1RC	No	6.52154	0.294562	3434	-1
J2302-51.1R	No	7.11009	0.360174	3445	-1
J2302-52.1RC	No	7.35091	0.303306	3615.4	1
J2302-53.1R	No	6.55187	0.166101	3453	1
J2302-54.1R	No	6.88524	0.211199	3453	-1
J2302-55.1R	No	6.9917	0.201026	3425	12
J2302-56.1MA	No	7.20328	0.198379	3668.9	25
J2302-57.1RC	No	6.89141	0.271927	3805	3
J2302-58.1R	No	6.65133	0.336	3374.8	1
J2302-59.1RC	No	5.19876	0.258452	3710.7	5
J2302-60.1RC	No	7.15895	0.275424	3720.2	2
J2302-61.1R	No	7.51175	0.238484	3319	5
J2302-62.1R	No	7.03751	0.147318	3450	0
J2302-65.1R	No	7.07688	0.213741	3410.7	7
J2302-66.1RC	No	5.48512	0.389537	3324.2	4
J2302-67.1MA	No	5.86341	0.228263	3677.5	33
Trondhjemitic gneiss (J2303)
J2303-1.1RC	No	7.07669	0.259533	3856	6
J2303-2.1MA	No	6.72125	0.175278	3944	6
J2303-3.1MA	No	7.32079	0.263543	3957.2	-1
J2303-4.1MA	No	7.21398	0.204904	3950.3	-1
J2303-5.1MA	No	7.97341	0.305825	3955.4	-1
J2303-6.1MA	No	7.22625	0.22083	3963.1	-2
J2303-7.1MA	No	7.02838	0.195233	3912.9	-1
J2303-8.1MA	No	7.0844	0.2521	3939	-1
J2303-9.1MA	No	4.28	0.212159	3817.6	6
J2303-10.1MA	No	7.32317	0.202918	3954	0
J2303-13.1MA	No	7.40539	0.20834	3920	0
J2303-15.1MA	No	6.70899	0.108015	3915.1	0
J2303-16.1MA	No	5.63152	0.281978	3961.5	0
J2303-17.1MA	No	6.61658	0.172541	3933.9	0
J2303-19.1MA	No	6.09944	0.189489	3744.1	18
J2303-21.1MA	No	7.17399	0.117736	3910	2
J2303-24.1RC	No	5.00233	0.222087	3765.9	26
J2303-26.1R	No	4.61755	0.185824	3242.9	16
J2303-31.1MA	No	6.58658	0.243454	3925.6	3
J2303-36.1MA	No	5.74633	0.225758	3932.1	2
J2303-46.1MA	No	7.00709	0.254016	3923.6	5
J2303-67.1MA	No	7.06889	0.262055	3950	1
TEM-1	No	8.05263	0.18223
TEM-2	No	8.03552	0.295252
TEM-3	No	8.17785	0.233837
TEM-4	No	8.27968	0.273368
TEM-5	No	8.33186	0.327958
TEM-6	No	8.61307	0.3066
TEM-7	No	8.12927	0.351939
TEM-8	No	8.56327	0.275588
TEM-9	No	8.09903	0.258762
TEM-10	No	8.02308	0.22314
TEM-11	No	8.43203	0.298643
TEM-12	No	8.03584	0.192729
TEM-13	No	7.5378	0.26497
TEM-14	No	8.97108	0.218343
TEM-15	No	8.26523	0.130429
TEM-16	No	8.39942	0.223875
TEM-17	No	8.30839	0.384927
TEM-18	No	7.77765	0.36721
TEM-19	No	7.70203	0.240967
TEM-20	No	8.22327	0.17227
TEM-21	No	7.66824	0.277265
TEM-22	No	8.59483	0.348097
TEM-23	No	8.40121	0.170818
TEM-24	No	8.2791	0.316241
TEM-25	No	8.05836	0.156281
TEM-26	No	8.17701	0.175264
TEM-27	No	8.27403	0.217687
Mount 2
91500-1	No	10.7809	0.380786
91500-2	Yes	9.19724	0.12894
91500-3	No	9.82288	0.183106
91500-4	No	10.1431	0.184067
Banded trondhjemitic gneiss (J2212A) c
J2212A-2.1MA	No	7.32221	0.371366	3961.8	2
J2212A-3.1MA	No	6.55199	0.281656	3892.4	7
J2212A-4.1MA	No	5.89896	0.201507	3877.1	11
J2212A-5.1MA	No	6.45237	0.356968	3920	8
J2212A-6.1MA	No	5.68052	0.217884	3714.8	-2
J2212A-9.1RC	No	6.76211	0.228727	3847.9	5
J2212A-11.1RC	No	5.40192	0.21125	3542	13
J2212A-12.1MA	No	7.25863	0.218468	3955	-1
J2212A-12.4RC	No	6.97216	0.20024	3965	-1
J2212A-13.1MA	No	7.07233	0.334918	3811.8	0
J2212A-15.1MA	No	5.92429	0.520863	3823.5	6
J2212A-16.1RC	No	5.94515	0.207178	3572.9	14
J2212A-17.1RC	No	5.16122	0.217374	3664.1	13
J2212A-23.1RC	No	4.97338	0.33008	3620.5	12
J2212A-27.1MA	No	6.70799	0.255792	3816.4	6
J2212A-29.1MA	No	7.55577	0.203084	3941.8	7
J2212A-34.2MA	No	6.55716	0.157414	3749	10
J2212A-38.1MA	No	5.81091	0.176811	3606.5	18
J2212A-39.1RC	No	5.70032	0.261962	3597.5	10
J2212A-40.1RC	No	5.26942	0.248199	3488.1	15
J2212A-44.1RC	No	5.47555	0.206556	3700	0
TEM-1	No	8.30163	0.464671
TEM-2	No	8.32581	0.16326
TEM-3	No	8.38578	0.225062
TEM-4	No	8.21036	0.248645
TEM-5	No	8.38949	0.2012
TEM-6	No	8.27952	0.340035
TEM-7	No	8.03793	0.264064
TEM-8	No	7.83617	0.212192
TEM-9	No	8.82908	0.241928
TEM-10	No	8.10407	0.235182
TEM-11	No	8.51176	0.242023
TEM-12	No	8.1666	0.331968
TEM-13	No	8.4286	0.298923
TEM-14	No	8.59265	0.273317
TEM-15	No	8.15062	0.1328
TEM-16	No	7.90777	0.28033
TEM-17	No	7.46769	0.341584
TEM-18	No	8.37136	0.236477
TEM-19	No	8.76666	0.567451
TEM-20	No	7.88752	0.199426
TEM-21	No	8.14756	0.389893
TEM-22	No	7.52639	0.248627
TEM-23	No	8.30841	0.303089
TEM-24	No	8.23156	0.492506
TEM-25	No	8.07486	0.27681
Mount 3
Banded trondhjemitic gneiss (J2212B) c
J2212B-1.1RC	No	6.52564	0.24477	3945.8	0
J2212B-1.2RC	No	6.19899	0.344999	3953.4	1
J2212B-2.1RC	No	5.44057	0.175313	3589.1	7
J2212B-5.1MA	No	6.77638	0.274309	3962	0
J2212B-5.2RC	No	5.74055	0.224447	3705.1	20
J2212B-6.1RC	No	6.21267	0.347933	3955	0
J2212B-11.1MA	No	5.60457	0.279873	3808.2	14
J2212B-11.3RC	No	4.61468	0.258949	3546	37
J2212B-12.1MA	No	6.57565	0.183453	3855	2
J2212B-17.1RC	No	5.75537	0.248682	3549.6	14
J2212B-19.1RC	No	7.04321	0.260704	3407	3
J2212B-25.1MA	No	5.4407	0.238057	3822.6	14
J2212B-27.1RC	No	6.37164	0.296474	3433	8
J2212B-30.2RC	No	6.77701	0.323595	3335.1	6
J2212B-32.2MA	No	6.55762	0.128161	3570	6
J2212B-34.1MA	No	5.43638	0.221869	3820	0
J2212B-35.1MA	No	7.10467	0.241794	3353.3	15
J2212B-36.1RC	No	6.19219	0.35965	3391.2	5
J2212B-38.1RC	No	7.02878	0.282017	3871	8
J2212B-44.1R	No	4.67989	0.235881	3001.9	53
J2212B-45.1RC	No	6.89592	0.192473	3386.8	10
J2212B-51.1RC	No	6.23868	0.233724	3381	4
J2212B-53.1R	No	6.57921	0.194204	3361.9	10
J2212B-54.1RC	No	5.81032	0.227019	3350.4	13
J2212B-63.1MA	No	6.7621	0.366831	3988.5	-1
J2212B-69.1RC	No	4.7221	0.358163	3325	6
J2212B-72.1MA	No	6.91755	0.167828	3822	14
J2212B-84.2MA	No	5.61782	0.136049	3948	-1
J2212B-87.2MA	No	6.19569	0.353106	3953.2	2
J2212B-100.1RC	No	5.65812	0.250111	3802.1	10
J2212B-101.1RC	No	6.79494	0.271977	3836.1	5
J2212B-102.1RC	No	6.95532	0.237836	3941.6	7
J2212B-108.1RC	No	4.08664	0.258273	3779.7	7
J2212B-109.1RC	No	6.58863	0.347548	3866.6	1
LDG-1	No	6.8411	0.307468
LDG-2	No	6.67204	0.21203
LDG-3	No	6.86199	0.143208
LDG-4	No	6.83965	0.302648
LDG-5	No	6.85306	0.232606
LDG-6	No	6.12415	0.22266
LDG-7	No	6.79646	0.295183
TEM-1	No	8.20566	0.313081
TEM-2	No	8.58251	0.201506
TEM-3	No	7.49946	0.253929
TEM-4	No	8.4721	0.147406
TEM-5	No	7.82164	0.426018
TEM-6	No	8.48309	0.402176
TEM-7	No	8.33147	0.309255
TEM-8	No	8.1791	0.247829
TEM-9	No	8.36411	0.255085
TEM-10	No	8.30063	0.299812
TEM-11	No	8.5359	0.295687
TEM-12	No	8.36763	0.293801
TEM-13	Yes	8.8387	0.178017
TEM-14	No	7.65423	0.267338
TEM-15	No	8.24337	0.303566
TEM-16	No	7.43467	0.451357
TEM-17	No	7.92709	0.268599
TEM-18	No	8.04192	0.233274
TEM-19	No	7.84608	0.268222
TEM-20	Yes	7.4239	0.161335
TEM-21	No	8.74125	0.224363
TEM-22	No	8.37211	0.243737
TEM-23	No	8.25281	0.406913
TEM-24	No	8.01266	0.144909
TEM-25	No	7.85342	0.25017
TEM-26	No	8.64239	0.200853
Notes:
a: The analyses marked as 'Yes' are statistical outliers in the standard zircons.
b: The analyses highlighted in yellow are located in the magmatic domains whose 207Pb/206Pb ages were used for calculating the weighted mean age of magmatic crystallization, and only these analyses were used to calculate the average of δ18O (VSMOW).
c: Zircons of J2212A and J2212B are separated from the same sample (J2212), with the zircons of J2212B being picked from the remaining heavy mineral concentrate after picking the zircons of J2212A

## Sheet: Table S3
Table S3 Zircon Hf isotopic composition of the 3.95 Ga trondhjemitic gneiss in the Labashan area, eastern Hebei, North China Craton
Analysis name and number	207Pb/206Pb age of individual analysis (Ma)	Age (Ma) a	176Yb/177Hf	1SE	176Lu/177Hf	1SE	176Hf/177Hf	1SE	εHf (0)	εHf (t) b	2σ c	tDM1 (Ma)	tDM2(Ma)	fLu/Hf
The first analysis (Nu Plasma II MC-ICP-MS, Northwest University)
Trondhjemitic gneiss (J2302)
J2302-2.1MA	3943	3951	0.14117	0.00166	0.00327221	3.46e-05	0.280486	3.02e-05	-81.2844	0.824834	2.20317	4056.31	4108.92	-0.90144
J2302-7.1MA	3959	3951	0.0253587	4.66e-05	0.000578765	8.61e-07	0.280303	1.88e-05	-87.784	1.624	1.41342	4019.41	4061.54	-0.982567
J2302-10.1R	3454	3450	0.0185866	7.56e-05	0.000383479	1.61e-06	0.280317	1.91e-05	-87.2606	-9.18431	1.42069	3980.16	4311.21	-0.988449
J2302-12.1R	3434	3450	0.016998	6.48e-05	0.000361504	9.38e-07	0.280346	2.15e-05	-86.2387	-8.10208	1.58547	3940.15	4246.68	-0.989111
J2302-22.1MA	3741	3951	0.0284847	0.00012	0.000657047	3.26e-06	0.280264	2.49e-05	-89.1596	0.0219045	1.83172	4078.62	4156.8	-0.980209
J2302-23.1MA	3952	3951	0.0465008	0.000132	0.00105609	4.33e-06	0.280326	2.11e-05	-86.953	1.15861	1.56881	4037.63	4089.2	-0.96819
J2302-33.1RC	3628	3951	0.0246875	4.52e-05	0.000584481	2.22e-06	0.280321	2.13e-05	-87.1298	2.2686	1.58384	3995.68	4023.19	-0.982395
J2302-34.1MA	3813	3951	0.0353883	0.000282	0.000867764	6.88e-06	0.280369	3.96e-05	-85.4359	3.20408	2.86086	3961.28	3967.49	-0.973863
J2302-37.1MA	3928	3951	0.0386046	0.000288	0.000813423	7.35e-06	0.280318	2.49e-05	-87.2536	1.51822	1.83168	4023.75	4067.83	-0.975499
J2302-43.1RC	3908	3951	0.0179166	2.27e-05	0.000425793	1.47e-06	0.280251	1.75e-05	-89.6016	0.207601	1.32621	4071.04	4145.78	-0.987175
J2302-45.1MA	2921	3951	0.0225211	9.81e-05	0.000485465	1.82e-06	0.280274	1.72e-05	-88.7883	0.865382	1.30586	4047.09	4106.67	-0.985378
J2302-51.1R	3445	3450	0.0165805	3.55e-05	0.000351622	7.89e-07	0.280319	1.83e-05	-87.197	-9.0446	1.3662	3974.59	4302.89	-0.989409
J2302-52.1RC	3615	3951	0.0191042	7.88e-05	0.000399242	1.95e-06	0.280328	1.75e-05	-86.8717	3.03519	1.32637	3967.35	3977.55	-0.987975
J2302-55.1R	3425	3450	0.0205286	5.77e-05	0.000419931	1.56e-06	0.280332	1.96e-05	-86.7408	-8.74678	1.4548	3964.59	4285.11	-0.987351
J2302-58.1R	3375	3450	0.0355528	8.43e-05	0.000796779	1.07e-06	0.280418	1.99e-05	-83.7032	-6.57862	1.47444	3889.21	4155.62	-0.976001
J2302-59.1RC	3711	3951	0.0231132	8.54e-05	0.000484008	9.39e-07	0.280343	2.4e-05	-86.3695	3.31036	1.7699	3957.27	3961.16	-0.985421
J2302-60.1RC	3720	3951	0.0388006	5.71e-05	0.000877876	1.96e-06	0.280272	1.96e-05	-88.8555	-0.274488	1.46675	4090.35	4174.39	-0.973558
J2302-61.1R	3460	3450	0.0259302	0.000148	0.000528573	2.51e-06	0.280332	2.09e-05	-86.7443	-9.00799	1.5438	3975.68	4300.64	-0.984079
J2302-61.2RC	3319	3951	0.0474945	0.000348	0.000893765	4.28e-06	0.280269	2.21e-05	-88.9651	-0.428528	1.6379	4096.12	4183.54	-0.973079
J2302-62.1R	3450	3450	0.0203834	1.74e-05	0.000411482	2.81e-07	0.280314	1.77e-05	-87.3879	-9.37904	1.32525	3987.7	4322.8	-0.987606
J2302-64.1R	3336	3450	0.016097	1.88e-05	0.000343908	8.35e-07	0.280312	2e-05	-87.4587	-9.29008	1.48238	3983.48	4317.53	-0.989641
J2302-66.1RC	3324	3951	0.0107592	2.39e-05	0.000241263	6.18e-07	0.280317	1.75e-05	-87.2677	3.06709	1.32691	3966.12	3975.65	-0.992733
Trondhjemitic gneiss (J2303)
J2303-1.1RC	3856	3951	0.0291021	0.000156	0.000661972	4.04e-06	0.280254	2.15e-05	-89.5097	-0.344854	1.59738	4092.15	4178.59	-0.980061
J2303-7.1MA	3913	3951	0.0200728	7.92e-05	0.000540488	1.39e-06	0.280304	1.61e-05	-87.7345	1.77854	1.23212	4013.65	4052.35	-0.98372
J2303-9.1MA	3818	3951	0.0188433	7.35e-05	0.000449363	1.46e-06	0.280271	2.17e-05	-88.9156	0.835536	1.61163	4048.09	4108.45	-0.986465
J2303-10.1MA	3954	3951	0.0218975	0.000239	0.000498325	4.78e-06	0.280268	2.27e-05	-89.0146	0.601848	1.68038	4056.8	4122.34	-0.98499
J2303-11.1MA	3722	3951	0.0143238	4.39e-05	0.000399036	8.65e-07	0.280291	1.89e-05	-88.1907	1.70462	1.42081	4016.13	4056.75	-0.987981
J2303-13.1MA	3920	3951	0.028286	6.08e-05	0.00063976	1.86e-06	0.280325	1.97e-05	-86.9919	2.25676	1.47437	3996.18	4023.89	-0.98073
J2303-14.1MA	3840	3951	0.0377135	0.000119	0.000819092	2.99e-06	0.280288	2.56e-05	-88.3109	0.43569	1.87981	4063.85	4132.19	-0.975329
J2303-15.1MA	3915	3951	0.0255546	6.7e-05	0.000588596	1.24e-06	0.280323	2.07e-05	-87.0485	2.33944	1.54274	3993.07	4018.97	-0.982271
J2303-23.1MA	3591	3951	0.0198376	0.000103	0.000437543	1.82e-06	0.280306	2.34e-05	-87.6779	2.11688	1.72862	4001.07	4032.22	-0.986821
J2303-26.1R	3243	3450	0.0298566	0.000165	0.000555072	3.2e-06	0.280473	2.58e-05	-81.7653	-4.05211	1.88316	3793.04	4004.7	-0.983281
J2303-31.1MA	3926	3951	0.0225276	0.00012	0.000540895	3.16e-06	0.280328	1.84e-05	-86.8752	2.64462	1.38659	3981.79	4000.81	-0.983708
J2303-32.1RC	3557	3951	0.0172	0.000134	0.000415725	3.68e-06	0.280324	1.84e-05	-87.0237	2.8367	1.38707	3974.64	3989.37	-0.987478
J2303-36.1MA	3932	3951	0.0200868	0.000101	0.000451544	2.08e-06	0.280309	1.86e-05	-87.5648	2.19283	1.40036	3998.3	4027.7	-0.986399
J2303-37.1RC	3905	3951	0.0316173	0.000566	0.000719077	1.18e-05	0.280276	2.11e-05	-88.7282	0.287823	1.57098	4069.01	4140.99	-0.978341
J2303-38.1MA	3807	3951	0.0263033	6.64e-05	0.000593566	1.6e-06	0.280299	2.1e-05	-87.929	1.43725	1.56324	4026.31	4072.65	-0.982121
J2303-42.1RC	3851	3951	0.0147187	8.77e-05	0.00028852	1.16e-06	0.280313	1.91e-05	-87.3986	2.80594	1.43477	3975.69	3991.2	-0.99131
J2303-46.1MA	3924	3951	0.0442904	0.000277	0.00108003	5.87e-06	0.280332	2.4e-05	-86.7514	1.29661	1.76853	4032.54	4081	-0.967469
J2303-48.1MA	3731	3951	0.0299156	0.000194	0.000688527	3.48e-06	0.280354	2.41e-05	-85.9628	3.16202	1.77634	3962.79	3970	-0.979261
J2303-50.1MA	3713	3951	0.0236411	0.00016	0.00053276	3.64e-06	0.280318	2.24e-05	-87.25	2.28856	1.65957	3994.88	4022	-0.983953
J2303-65.1MA	3655	3951	0.0193264	0.000142	0.00043248	2.16e-06	0.280304	2.18e-05	-87.7274	2.08075	1.61858	4002.39	4034.37	-0.986973
Banded trondhjemitic gneiss (J2212)
J2212B-1.1RC	3946	3951	0.0432886	0.000454	0.000928448	9.42e-06	0.280295	2.28e-05	-88.0492	0.401016	1.6866	4065.47	4134.25	-0.972035
J2212B-2.1RC	3589	3951	0.0443585	0.000131	0.000908933	2.25e-06	0.280407	3.04e-05	-84.1098	4.42988	2.21409	3915.7	3894.46	-0.972622
J2212B-2.2R	3436	3450	0.0269624	0.000126	0.000572358	2.46e-06	0.280566	3.16e-05	-78.4518	-0.753228	2.28869	3670.97	3807.14	-0.98276
J2212B-5.1MA	3962	3951	0.0249448	0.000238	0.000545113	4.64e-06	0.280292	1.89e-05	-88.1553	1.34122	1.42053	4029.75	4078.37	-0.983581
J2212B-5.2RC	3705	3951	0.0286781	0.000121	0.00056631	3.9e-06	0.280408	2.36e-05	-84.0674	5.40875	1.7422	3879.92	3836.09	-0.982942
J2212B-6.1RC	3955	3951	0.029882	0.000351	0.000650837	7.92e-06	0.28027	1.9e-05	-88.9545	0.245857	1.42736	4070.35	4143.49	-0.980396
J2212B-12.1MA	3855	3951	0.0159883	0.00012	0.000332616	1.77e-06	0.280272	1.91e-05	-88.852	1.21873	1.43462	4033.79	4085.66	-0.989981
J2212B-19.1RC	3407	3951	0.0231386	3.71e-05	0.000521087	1.13e-06	0.280275	1.83e-05	-88.76	0.796611	1.37978	4049.71	4110.76	-0.984305
J2212B-27.1RC	3433	3951	0.0243201	5.09e-05	0.000505046	7.88e-07	0.280308	2.2e-05	-87.6001	2.01098	1.63205	4005.05	4038.52	-0.984788
J2212B-30.2RC	3335	3951	0.0181776	0.000137	0.000376577	2.81e-06	0.280302	2.89e-05	-87.8017	2.15853	2.11051	3999.47	4029.74	-0.988657
J2212B-32.1MA	3845	3951	0.0163932	0.000434	0.000374953	9.39e-06	0.280285	2.22e-05	-88.4029	1.55629	1.64697	4021.52	4065.58	-0.988706
J2212B-34.1MA	3820	3951	0.0267337	0.000131	0.000568921	2.96e-06	0.280416	2.62e-05	-83.7633	5.70853	1.92215	3868.85	3818.21	-0.982864
J2212B-51.1RC	3381	3951	0.0383261	0.000157	0.000837223	4.32e-06	0.280384	2.75e-05	-84.9232	3.80499	2.01194	3938.97	3931.7	-0.974782
J2212B-54.1RC	3350	3951	0.0210896	7.18e-05	0.000462107	8.98e-07	0.280357	2.21e-05	-85.8638	3.88052	1.63907	3936.31	3927.19	-0.986081
J2212B-84.1RC	3766	3951	0.0305977	6.25e-05	0.000618343	8.85e-07	0.280377	2.46e-05	-85.1636	4.16029	1.81102	3925.93	3910.52	-0.981375
J2212B-87.2MA	3953	3951	0.0262343	0.000404	0.000672884	1.05e-05	0.280278	5.61e-05	-88.6645	0.478258	4.02894	4061.85	4129.67	-0.979732
J2212B-102.1RC	3942	3951	0.0244408	8.49e-05	0.00055252	1.97e-06	0.280335	2.35e-05	-86.6383	2.85197	1.73521	3974.16	3988.46	-0.983358
J2212B-108.1RC	3780	3951	0.0155819	0.000126	0.000390589	3.71e-06	0.280273	6.93e-05	-88.8201	1.09246	4.96636	4038.54	4093.17	-0.988235
J2212B-109.1RC	3867	3951	0.023988	0.000103	0.000525641	2.14e-06	0.280343	2.25e-05	-86.3589	3.20733	1.66641	3961.07	3967.3	-0.984167
Standard Mudtank			0.00379902	7.32e-06	7.01939e-05	1.37e-07	0.282513	1.87e-05	-9.60801
Standard Mudtank			0.00384893	4.9e-06	7.20064e-05	1.28e-07	0.282507	1.71e-05	-9.83079
Standard Mudtank			0.00378462	5.52e-06	7.11751e-05	1.44e-07	0.282489	2.1e-05	-10.4779
Standard Mudtank			0.00388884	4.85e-06	7.26946e-05	1.42e-07	0.282487	1.76e-05	-10.5522
Standard Mudtank			0.00390664	5.1e-06	7.30917e-05	1.37e-07	0.282512	1.8e-05	-9.6469
Standard Mudtank			0.000971028	3.5e-06	1.89621e-05	1.26e-07	0.282482	1.57e-05	-10.7149
Standard Mudtank			0.00136622	3.69e-06	2.61551e-05	1.41e-07	0.2825	1.59e-05	-10.0854
Standard Mudtank			0.00275649	4.58e-06	5.36807e-05	1.42e-07	0.282489	1.79e-05	-10.4815
Standard Mudtank			0.00277226	9.13e-06	5.21487e-05	1.67e-07	0.282479	1.61e-05	-10.8033
Standard Mudtank			0.00396945	5.26e-06	7.45661e-05	1.21e-07	0.282496	1.58e-05	-10.2127
Standard Mudtank			0.00248955	5.94e-06	4.93568e-05	1.47e-07	0.28252	1.66e-05	-9.364
Standard Mudtank			0.0025478	4.07e-06	5.03868e-05	1.28e-07	0.282517	1.72e-05	-9.4807
Standard Mudtank			0.00259744	4.58e-06	5.17653e-05	1.4e-07	0.282515	1.64e-05	-9.56557
Standard Mudtank			0.00255795	4.14e-06	5.11861e-05	1.32e-07	0.282528	1.81e-05	-9.09525
Standard Mudtank			0.00259396	4.39e-06	5.16502e-05	1.56e-07	0.282504	1.93e-05	-9.92981
Standard Mudtank			0.00029832	2.82e-06	5.94963e-06	1.2e-07	0.282484	1.59e-05	-10.6335
Standard Mudtank			0.000269266	2.95e-06	5.54205e-06	1.22e-07	0.282523	1.63e-05	-9.24731
Standard Mudtank			0.000404357	3.39e-06	8.00431e-06	1.4e-07	0.282516	1.84e-05	-9.50192
Standard Mudtank			0.00141336	3.9e-06	2.76708e-05	1.33e-07	0.282521	1.74e-05	-9.32864
Standard Mudtank			0.00216568	4.36e-06	4.31387e-05	1.44e-07	0.282541	1.69e-05	-8.62139
Standard GJ-1			0.0117835	1.26e-05	0.000272452	2.13e-07	0.281988	2.49e-05	-28.1946
Standard GJ-1			0.0116812	1.22e-05	0.000270774	2.25e-07	0.282002	2.38e-05	-27.6818
Standard GJ-1			0.0118605	1.19e-05	0.000274692	2.06e-07	0.282042	2.32e-05	-26.2602
Standard GJ-1			0.0116153	1.28e-05	0.000269971	2.15e-07	0.28201	2.31e-05	-27.4166
Standard GJ-1			0.0114623	1.14e-05	0.00026749	1.96e-07	0.282032	2.3e-05	-26.6315
Standard GJ-1			0.0116543	1.22e-05	0.000271477	2.07e-07	0.282004	2.21e-05	-27.6111
Standard GJ-1			0.011582	1.15e-05	0.000270338	1.99e-07	0.281981	2.15e-05	-28.4209
Standard GJ-1			0.0115034	1.21e-05	0.0002685	2.13e-07	0.28198	2.19e-05	-28.4669
Standard GJ-1			0.0112205	1.06e-05	0.000274009	2.3e-07	0.282	2.43e-05	-27.7738
Standard GJ-1			0.0112127	1.04e-05	0.000273358	1.98e-07	0.282032	2.41e-05	-26.6315
Standard GJ-1			0.0112121	1.22e-05	0.00027342	2.1e-07	0.282012	2.32e-05	-27.3423
Standard GJ-1			0.0112384	1.19e-05	0.000274719	2.33e-07	0.282006	2.11e-05	-27.5545
Standard GJ-1			0.0112224	1.15e-05	0.000274208	2.12e-07	0.282035	2.1e-05	-26.5148
Standard GJ-1			0.0107009	9.4e-06	0.000263783	2.22e-07	0.282034	2.25e-05	-26.5679
Standard GJ-1			0.010677	1.11e-05	0.000262931	2.46e-07	0.282003	2.33e-05	-27.6606
Standard GJ-1			0.0109502	1.11e-05	0.000270042	2.72e-07	0.282011	2.66e-05	-27.36
Standard GJ-1			0.0109167	1.05e-05	0.00026822	2.13e-07	0.282033	2.36e-05	-26.5962
Standard GJ-1			0.0110525	1.19e-05	0.000271548	2.35e-07	0.282009	2.24e-05	-27.452
Standard GJ-1			0.010723	1.08e-05	0.000264349	2.39e-07	0.282019	2.4e-05	-27.0842
The Second analysis (Neptune Plus MC-ICP-MS, Wuhan Center of China Geological Survey)
Trondhjemitic gneiss (J2302)
J2302-1.1MA	3942	3951	0.0259085	0.000478066	0.000629789	1.06959e-05	0.280313	9.62804e-06	-87.4283	1.84354	0.819979	4011.41	4048.48	-0.98103
J2302-3.1RC	3944	3951	0.014717	0.000259227	0.00041283	8.25908e-06	0.280263	9.00085e-06	-89.191	0.657429	0.783285	4054.52	4119.04	-0.987565
J2302-5.1MA	3954	3951	0.0292922	0.00077499	0.00072222	1.62473e-05	0.280307	6.75472e-06	-87.6224	1.39519	0.660388	4028.12	4075.15	-0.978246
J2302-11.1MA	3938	3951	0.0237833	0.000547157	0.000612085	1.14001e-05	0.280309	7.08643e-06	-87.5433	1.77593	0.675711	4013.87	4052.5	-0.981564
J2302-13.1MA	3959	3951	0.0321026	0.000121978	0.000758479	3.23667e-06	0.280303	8.04962e-06	-87.7637	1.15353	0.725149	4037.13	4089.52	-0.977154
J2302-14.1RC	3740	3951	0.0210622	0.000456349	0.000496168	1.06138e-05	0.280309	1.02109e-05	-87.5679	2.06775	0.855883	4002.95	4035.14	-0.985055
J2302-17.1MA	3721	3951	0.0168798	0.000157319	0.000392188	2.17972e-06	0.280312	7.66999e-06	-87.4456	2.47528	0.706322	3987.88	4010.89	-0.988187
J2302-25.1MA	3935	3951	0.0279026	0.000453401	0.000708895	1.2901e-05	0.280335	8.26765e-06	-86.6445	2.41845	0.741048	3990.29	4014.27	-0.978648
J2302-29.1MA	3943	3951	0.0485448	0.000496483	0.00118662	1.03522e-05	0.280345	9.31918e-06	-86.3018	1.45917	0.798093	4026.69	4071.32	-0.964258
J2302-30.1MA	3960	3951	0.0176292	0.000211143	0.000441819	4.60065e-06	0.280274	8.69575e-06	-88.7972	0.975688	0.764431	4042.94	4100.11	-0.986692
J2302-42.1RC	3589	3951	0.0278728	0.000368486	0.000592411	4.83714e-06	0.280317	1.07029e-05	-87.2663	2.10917	0.883936	4001.56	4032.68	-0.982156
J2302-53.1R	3453	3450	0.019241	8.76143e-05	0.000446622	2.39286e-06	0.280369	8.49386e-06	-85.4363	-7.49517	0.728488	3918.91	4210.44	-0.986548
J2302-54.1R	3453	3450	0.0168028	0.00018921	0.00039588	5.6094e-06	0.280329	9.35629e-06	-86.8495	-8.79928	0.780921	3966.19	4288.25	-0.988076
J2302-56.1MA	3669	3951	0.0177549	0.000118956	0.000450345	2.71869e-06	0.280266	8.44537e-06	-89.0899	0.656975	0.749655	4054.64	4119.06	-0.986435
J2302-57.1RC	3805	3951	0.0104299	0.000302456	0.000315038	7.70248e-06	0.28028	8.46926e-06	-88.5955	1.52557	0.752962	4022.53	4067.41	-0.990511
Plesovice			0.0107195	2.39438e-05	0.000194243	7.25406e-08	0.28249	6.09289e-06	-10.4479
Plesovice			0.0132963	2.34146e-05	0.000241628	5.01023e-07	0.282491	7.27834e-06	-10.386
Plesovice			0.012061	5.719e-05	0.00021465	4.77145e-07	0.282489	5.91108e-06	-10.4802
Plesovice			0.010222	2.02191e-05	0.000185614	1.49554e-07	0.28249	7.44303e-06	-10.4229
Plesovice			0.0104218	2.3914e-05	0.000189796	9.97734e-08	0.282486	6.3489e-06	-10.5617
Plesovice			0.0118581	1.8042e-05	0.000219883	1.93291e-07	0.282487	5.50057e-06	-10.538
FC-1 - 1			0.0416021	0.000212386	0.00103306	2.00786e-06	0.282192	8.87672e-06	-20.979
FC-1 - 2			0.0488483	7.92171e-05	0.0011823	2.91864e-06	0.282188	8.19868e-06	-21.1047
FC-1 - 3			0.0335722	0.000210558	0.000832913	3.77892e-06	0.282185	8.6188e-06	-21.2108
FC-1 - 4			0.0601632	0.000154941	0.00140668	1.50511e-07	0.282213	7.49307e-06	-20.2263
FC-1 - 5			0.0583169	0.00015484	0.00137283	3.90726e-07	0.282208	8.01023e-06	-20.4145
FC-1 - 6			0.0428645	9.86468e-05	0.00106312	4.22452e-06	0.282192	7.8275e-06	-20.9597
FC-1 - 7			0.0263668	0.000423775	0.000664057	1.0989e-05	0.282163	7.84397e-06	-21.9889
FC-1 - 8			0.0447636	7.6012e-05	0.00106187	6.64052e-07	0.282166	7.14032e-06	-21.8834
FC-1 - 9			0.055367	3.85585e-05	0.00130521	2.64829e-06	0.282201	8.19154e-06	-20.647
FC-1 - 10			0.0539893	0.000115717	0.00127341	2.7007e-07	0.282198	7.52481e-06	-20.7498
FC-1 - 11			0.0656477	6.34102e-05	0.00156044	2.12556e-06	0.282205	8.16124e-06	-20.4941
FC-1 - 12			0.0267147	0.000604891	0.000674034	1.51563e-05	0.282166	8.09492e-06	-21.8884
FC-1 - 13			0.0432983	0.000126328	0.00104241	4.4462e-06	0.282181	6.84247e-06	-21.3439
FC-1 - 15			0.0238195	0.000377748	0.000604583	9.45791e-06	0.282174	8.8899e-06	-21.609
Notes:
a: Weighted mean 207Pb/206Pb ages used to calculate εHf (t) values.
b: The analyses highlighted in gray were used to calculate the weighted mean of εHf (t) value.
c: Error calculation following the method proposed by Ickert (2013).

## Sheet: Table S4
Table S4 Trace element composition of zircons from the 3.95 Ga trondhjemitic gneiss in the Labashan area, eastern Hebei, North China Craton
Analysis number	Analytical technique	Instrument	Filter a	Age (Ma)	2σ (Ma)	Discordance (%)	P (ppm)	Ti (ppm)	Fe (ppm)	Y (ppm)	Nb (ppm)	La (ppm)	Ce (ppm)	Pr (ppm)	Nd (ppm)	Sm (ppm)	Eu (ppm)	Gd (ppm)	Tb (ppm)	Dy (ppm)	Ho (ppm)	Er (ppm)	Tm (ppm)	Yb (ppm)	Lu (ppm)	Hf (ppm)	Th (ppm) b	U (ppm) b	Th/U	Yb/Gd	Dy/Yb	T (°C) c	Ce/Ce* d	Eu/Eu* d	Ui e	ΔFMQ e	LREE-I f
Trondhjemitic gneiss (J2302)
J2302-1.1MA	SIMS	SHRIMP II	Y	3942	14	3		4.98697		966.971		0.329341	7.06643	0.187258	2.34565	3.65194	0.710873	17.444	7.06849	75.0131	29.6094	128.865	25.9103	214.829	48.6763		57.2542	73.9114	0.774632	12.3153	0.349177	728.663	6.97656	0.272289	162.062	-0.137026	52.5203
J2302-2.1MA	SIMS	SHRIMP II	N	3943.5	5.3	3		5.53152		2670.76		4.77415	17.682	1.50331	10.3159	12.15	2.95447	44.3743	17.7692	186.436	75.6929	363.221	81.444	725.892	194.534		158.419	307.432	0.5153	16.3584	0.256837	738.163	1.61825	0.389	674.38	0.127708	33.4172
J2302-3.1RC	SIMS	SHRIMP II	Y	3947	13	-1		3.90932		386.473		0.0128833	4.20516	0.0312233	0.433665	0.815715	0.17975	5.49325	2.46981	27.5961	11.5693	54.6217	11.5577	103.261	24.5859		13.4594	30.3484	0.443496	18.7978	0.267246	707.032	51.4062	0.259603	66.6391	-0.055362	97.4652
J2302-4.1RC	SIMS	SHRIMP II	Y	3472	11	-1		2.7427		927.629		0.00939546	13.0725	0.0682757	1.63796	3.17168	0.166122	19.1878	7.52022	73.4515	27.6334	118.224	21.7761	161.269	37.5251		47.7472	60.8202	0.785055	8.40477	0.455459	677.162	126.546	0.0651018	117.6	1.72853	68.0017
J2302-5.1MA	SIMS	SHRIMP II	N	3953.5	6.4	1		14.6217		1531.79		132.017	262.491	32.0484	176.099	37.2874	9.40712	46.4787	15.2696	135.822	45.6658	180.25	33.1219	250.736	54.1951		156.344	167.76	0.931947	5.39465	0.541694	836.894	0.989421	0.690832	369.059	4.49116	4.41387
J2302-7.1MA	SIMS	SHRIMP II	N	3959	11	0		5.01417		864.624		0.662623	6.5268	0.571826	4.8142	4.1561	0.818602	14.7928	5.88536	68.6367	26.1745	112.118	22.3722	184.243	41.0747		53.4598	66.1127	0.808616	12.4549	0.372534	729.157	2.59968	0.319175	145.674	-0.187126	30.7718
J2302-10.1R	SIMS	SHRIMP II	Y	3454	11	1		4.61147		687.467		0.0512585	15.4426	0.130671	2.50281	5.11474	0.259507	18.095	6.18768	66.1039	22.1804	82.3025	13.478	96.5722	19.8407		98.4086	64.3077	1.53028	5.33694	0.684502	721.604	46.263	0.0824673	123.787	1.52224	39.3361
J2302-13.1MA	SIMS	SHRIMP II	Y	3959.4	7	1		13.065		876.409		0.0228106	7.75343	0.246418	4.36835	5.15288	0.533901	18.9686	7.07559	75.3149	27.8861	116.389	22.427	178.259	39.0328		122.936	121.065	1.01545	9.39757	0.422502	824.484	25.3556	0.165098	266.788	-1.24481	31.8571
J2302-20.1R	SIMS	SHRIMP II	Y	3431.4	8.8	1		2.79912		1240.21		0.00457924	11.5428	0.0780519	1.98098	4.52769	0.214291	19.1257	7.82572	97.8998	37.3126	165.212	33.5522	270.593	61.8795		90.5074	110.865	0.816376	14.1481	0.361798	678.829	149.695	0.0704011	212.216	0.982301	71.0422
J2302-24.1R	SIMS	SHRIMP II	Y	3466	11	-2		4.40904		775.926		0.00398838	18.6961	0.086878	2.14909	4.67694	0.209245	16.7684	5.9367	70.7721	24.1287	93.4633	16.5194	121.605	25.4127		75.6076	56.7609	1.33204	7.25202	0.581983	717.602	246.253	0.0722356	109.587	1.99894	48.0634
J2302-25.1MA	SIMS	SHRIMP II	N	3935.1	7.6	3		13.8843		1256.07		3.15605	36.7425	5.41015	37.7073	20.8353	8.14578	29.3583	9.14889	117.384	35.9325	130.117	23.651	194.917	46.8378		47.1418	107.647	0.43793	6.63924	0.602225	831.155	2.1801	1.00691	235.565	1.51179	8.74695
J2302-29.1MA	SIMS	SHRIMP II	Y	3942.9	8.3	-1		11.8523		275.88		0.364914	6.39985	0.219949	1.5583	1.10886	0.331827	4.72356	1.82958	20.0884	8.13559	37.1543	8.5558	83.1224	17.4458		55.148	82.4097	0.669193	17.5974	0.241673	813.967	5.53858	0.443264	180.742	-1.15533	31.0075
J2302-30.1MA	SIMS	SHRIMP II	Y	3959.7	7.1	2		4.05037		1148.68		0.0534103	9.62358	0.225121	3.98049	5.97899	0.752488	22.6161	8.78721	93.2054	35.7674	152.2	30.2555	247.823	51.2289		94.1355	122.95	0.765639	10.9578	0.376096	710.123	21.5179	0.197834	270.965	0.133603	39.0044
J2302-49.1R	SIMS	SHRIMP II	Y	3469	12	0		5.6145		540.307		0.0101062	15.1045	0.0890235	2.04182	3.98519	0.216415	17.9444	6.1037	53.9732	17.7164	64.6106	10.7325	76.0466	13.7587		71.6746	50.0174	1.43299	4.2379	0.709738	739.542	123.465	0.0782387	96.6395	1.52786	39.9774
J2302-50.1RC	SIMS	SHRIMP II	Y	3434	12	-1		5.15453		573.368		0.00878041	15.2777	0.074525	1.76277	4.18158	0.194784	16.8626	6.0082	54.6986	18.3693	68.1504	11.5922	85.2509	15.8905		88.2009	56.6709	1.55637	5.05562	0.641618	731.673	146.431	0.0709159	108.548	1.52099	44.1107
J2302-51.1R	SIMS	SHRIMP II	N	3445	13	-1		5.09221		700.314		2.29118	27.1134	0.867641	4.63907	3.74713	2.18006	17.6073	6.55493	62.4761	21.759	86.5232	15.8443	124.349	25.865		88.4701	65.1378	1.3582	7.06238	0.502424	730.563	4.71487	0.820533	125.106	2.40431	30.1404
J2302-52.1RC	SIMS	SHRIMP II	Y	3615.4	5.4	1		5.30451		614.994		0.0109909	19.3373	0.0819449	1.66698	3.60296	0.185586	15.9195	5.73491	57.2309	19.9057	74.9929	13.5696	101.015	19.7727		348.779	364.776	0.956146	6.34534	0.566559	734.3	157.98	0.074916	731.549	0.248822	50.2164
J2302-53.1R	SIMS	SHRIMP II	Y	3453	11	1		4.91879		787.211		0.0131756	21.0791	0.0923553	2.10532	4.5001	0.201589	20.0655	7.50738	69.7672	24.2869	95.1387	17.0969	127.386	26.3637		102.597	72.2488	1.42005	6.34851	0.547683	727.414	148.156	0.0648565	139.039	1.90561	48.642
J2302-54.1R	SIMS	SHRIMP II	Y	3453	11	-1		5.0216		723.887		0.00900175	20.081	0.0689102	1.63226	3.93887	0.193689	18.716	6.96407	65.5653	22.6612	86.908	15.3221	111.552	22.5675		100.24	71.0558	1.41072	5.96026	0.587753	729.292	197.681	0.0689662	136.743	1.81788	56.8142
J2302-55.1R	SIMS	SHRIMP II	N	3425	12	12		8.11219		795.047		1.19165	20.4776	0.540237	4.9112	6.53859	1.70536	26.4341	8.98136	80.0271	25.7523	91.3027	15.1478	108.574	20.9946		104.097	76.6211	1.35859	4.10735	0.737073	774.882	6.25744	0.396567	146.436	1.37599	28.534
J2302-57.1RC	SIMS	SHRIMP II	Y	3805	20	3		4.04525		454.654		0.017363	3.51968	0.0696461	0.874348	1.12979	0.813083	7.98995	3.12007	33.1147	13.6725	63.4345	14.291	136.015	34.8954		21.2115	41.3498	0.512977	17.0232	0.243464	710.012	24.8157	0.827347	87.2391	-0.627843	67.1841
J2302-61.1R	SIMS	SHRIMP II	N	3319	15	5		9.9131		933.43		7.07481	90.988	3.91276	25.3114	14.1121	4.73159	29.8222	11.0376	104.051	31.4187	111.891	19.5479	140.879	26.2393		53.8415	87.8044	0.613198	4.72397	0.738581	795.192	4.24004	0.705123	163.545	3.69554	11.484
J2302-62.1R	SIMS	SHRIMP II	Y	3450	12	0		3.19127		754.112		0.0107645	15.2806	0.124897	2.45999	5.01897	0.279413	24.9966	8.32443	73.3957	23.915	87.3273	14.557	101.028	20.3625		66.2622	50.2865	1.31769	4.04167	0.72649	689.702	102.177	0.0762646	96.7015	2.03789	44.4594
Average g								8.48866		816.985		0.192619	7.71082	0.219687	3.0632	3.97317	0.582272	15.9381	6.19022	65.9055	25.3496	108.652	21.7871	181.008	39.096		82.3683	100.084	0.806228	12.567	0.347362	769.309	14.8472	0.269621	220.139	-0.600891	38.5973
2SE								4.62663		378.084		0.179436	1.38976	0.0244662	1.33222	2.13873	0.191984	7.78488	3.01744	31.7069	11.9643	49.9225	9.38423	71.1741	15.3593		32.4337	25.5634	0.147419	3.55917	0.0766924	58.2916	10.0585	0.124147	56.817	0.701591	9.95069
Trondhjemitic gneiss (J2303)
J2303-1.1RC	SIMS	SHRIMP II	N	3856	12	6		10.4628		895.742		18.6595	79.3128	9.6609	62.0142	28.671	14.1759	48.9871	12.5022	90.7931	28.2439	105.597	20.1546	164.491	37.5361		26.255	41.4361	0.633625	3.35785	0.551963	800.795	1.44833	1.15641	88.6668	3.94173	4.63079
J2303-2.1MA	SIMS	SHRIMP II	N	3944	12	6		6.24568		473.268		0.00521238	4.26099	0.0311017	0.579848	1.22914	0.188141	4.09048	2.50022	34.9296	14.7222	68.1994	14.995	134.445	30.4088		21.9346	55.4278	0.395733	32.8678	0.259805	749.525	82.0511	0.256518	121.604	-0.961391	88.657
J2303-3.1MA	SIMS	SHRIMP II	Y	3957.2	9.4	-1		3.56224		1098.88		0.127436	6.67254	0.132802	2.16865	4.01558	0.968099	11.6999	5.81036	95.8997	36.1432	154.501	31.4391	265.061	56.9292		42.5414	57.5254	0.739525	22.6549	0.361802	699.016	12.5756	0.431794	126.686	0.269263	68.1028
J2303-4.1MA	SIMS	SHRIMP II	N	3950.3	8.5	-1		4.05234		460.986		3.46023	16.1451	1.64171	9.84344	3.111	0.769938	8.94443	3.31046	35.9118	13.9857	63.7225	13.3036	117.621	26.4332		66.611	85.4484	0.779547	13.1501	0.305319	710.165	1.66083	0.446224	187.806	1.3498	15.1918
J2303-5.1MA	SIMS	SHRIMP II	N	3955.4	8.6	-1		8.06499		1079.3		1.76004	23.7768	1.54921	16.2909	11.6678	3.3528	24.9424	8.63273	92.9072	33.9142	143.107	28.8899	246.384	53.7614		44.3486	70.3243	0.630629	9.8781	0.377084	774.302	3.53039	0.600852	154.793	1.59225	13.6657
J2303-6.1MA	SIMS	SHRIMP II	N	3963.1	7.5	-2		10.3424		208.619		12.1952	54.9472	5.34231	32.0785	15.2051	5.88093	24.4248	5.21159	30.6007	7.00686	20.2363	3.34812	30.7089	12.0624		87.7023	99.6882	0.879766	1.25728	0.996479	799.589	1.66906	0.932953	219.915	2.5259	2.96647
J2303-7.1MA	SIMS	SHRIMP II	Y	3912.9	9.6	-1		3.96333		483.002		0.00958146	4.2574	0.0498185	1.01175	1.47763	0.56189	5.78645	2.76123	35.5117	14.5284	68.5517	16.4606	160.677	38.8066		35.4397	84.7219	0.418306	27.7679	0.221013	708.226	47.7769	0.587471	184.226	-0.928635	59.1321
J2303-8.1MA	SIMS	SHRIMP II	Y	3939	11	-1		3.40461		469.285		0.059833	2.96258	0.040319	0.758146	1.34065	0.274386	7.78549	3.23837	36.1746	14.1773	63.7107	13.1805	116.943	25.8089		30.7125	49.9313	0.615095	15.0207	0.309335	695.161	14.7887	0.259648	109.387	-0.973764	74.6974
J2303-10.1MA	SIMS	SHRIMP II	N	3954	16	0		8.23378		945.356		0.84449	4.53017	0.409694	4.81565	4.01692	1.32395	21.315	7.81723	77.9423	28.7528	122.003	24.7937	206.958	43.3248		52.8485	69.715	0.758065	9.7095	0.37661	776.362	1.88831	0.437429	153.39	-1.29654	35.5887
J2303-15.1MA h	SIMS	SHRIMP II	Y	3915.1	8.1	0						0.220859	6.1903	0.0922117	0.917528	1.52409	0.25628	8.28673	3.56209	40.7731	16.1686	72.9627	15.244	133.091	28.594		71.6867	95.0953	0.75384	16.0607	0.306355		10.6352	0.220466	206.912		71.1904
J2303-16.1MA h	SIMS	SHRIMP II	Y	3961.5	8.8	0						0.17413	5.58744	0.0938964	0.849827	1.05519	0.176988	5.47502	2.46857	29.1825	12.2	57.785	12.5968	114.997	25.6973		49.3154	69.2452	0.712186	21.004	0.253767		10.7136	0.225117	152.686		61.9954
J2303-17.1MA h	SIMS	SHRIMP II	Y	3933.9	8.9	0						0.204204	6.15598	0.232544	4.09261	5.83348	0.935213	21.9352	8.41839	90.0602	33.7136	143.09	29.0549	241.261	50.3297		45.3662	66.1876	0.685419	10.9988	0.37329		6.92624	0.252755	144.789		37.4441
J2303-21.1MA h	SIMS	SHRIMP II	Y	3910	11	2						0.268495	8.99115	0.253298	3.00399	4.15945	0.867859	15.0571	5.11009	56.0341	20.9549	87.1696	18.2456	158.15	32.8056		36.1923	53.9473	0.670883	10.5034	0.354309		8.4531	0.335262	117.21		32.1248
J2303-31.1MA h	SIMS	SHRIMP II	N	3925.6	8.1	3						0.607226	9.92911	0.36177	3.2332	3.45567	0.506481	12.0084	4.68143	49.3359	18.8374	82.0904	17.3932	152.812	34.7373		32.8624	97.0649	0.338561	12.7254	0.322855		5.19401	0.240369	211.831		29.536
J2303-34.1MA	SIMS	SHRIMP II	N	3468.2	14.7141	47.6114		33.4769		2067.81		12.0145	73.2403	2.93541	23.5368	28.555	13.9345	82.5009	23.5728	210.711	67.6796	254.178	47.331	368.988	72.4653		387.567	625.033	0.620075	4.47253	0.571052	937.624	3.02376	0.877701	1207.4	0.526689	16.3316
J2303-36.1MA	SIMS	SHRIMP II	Y	3932.1	8.2	2		3.68301		1080.78		0.158852	8.73751	0.240217	3.63654	5.37496	0.631622	22.1458	8.73867	92.1642	34.3873	143.715	28.8024	235.68	47.3597		177.762	183.946	0.966381	10.6422	0.391057	701.876	10.9667	0.176989	402.186	-0.294421	42.4908
J2303-46.1MA h	SIMS	SHRIMP II	N	3923.6	6.1	5						3.40182	16.8668	2.0822	13.1916	7.3107	1.83759	12.1081	4.47755	48.2956	19.6327	93.284	21.7833	206.987	47.2258		197.421	214.002	0.922519	17.0949	0.233326		1.55382	0.59711	466.764		10.2672
J2303-67.1MA	SIMS	SHRIMP II	N	3950	12	1		10.0834		1464.52		6.05363	43.2417	4.18962	34.5791	26.9211	7.56646	50.5793	15.3655	141.505	47.9579	190.923	36.5874	298.228	62.5689		43.7448	71.1384	0.614926	5.89624	0.474485	796.954	2.10519	0.626879	156.341	2.42818	9.34848
Average g								3.6533		782.986		0.152924	6.19436	0.141888	2.05488	3.09763	0.584042	12.2715	5.01347	59.475	22.7842	98.9357	20.628	178.233	38.2914		61.1271	82.575	0.695204	16.8316	0.321366	701.07	15.3545	0.311188	180.51	-0.481889	55.8972
2SE								0.236035		354.433		0.0603258	1.44134	0.0620748	0.966699	1.38873	0.227272	4.80495	1.75095	20.2258	7.24037	28.9244	5.5208	42.5242	8.50773		34.4915	30.9336	0.107904	4.52905	0.0424968	5.50726	9.41497	0.0967974	67.5402	0.589038	11.5553
Banded trondhjemitic gneiss (J2212)
J2212A-2.1MA	SIMS	Cameca 1300	N	3961.82	8.7349	1.71436	451	12.5	77.5	1423	3.27	2.33	14.2	0.875	2.92	9.68	1.43	34.1	12.7	127	45.1	182	34.8	273	57.2	8304	113.424	114.24	0.992859	8.00587	0.465201	819.686	2.43832	0.240627	251.922	-0.106006	56.613
J2212A-3.1MA	SIMS	Cameca 1300	N	3892.43	7.82372	6.9872	530	20.6	2204	1464	3.45	5.75	26.8	1.75	4.7	11	3.26	33.7	12.5	126	45.4	191	38	320	72.9	8263	127.633	184.936	0.690145	9.49555	0.39375	876.472	2.07141	0.517643	399.81	0.162157	38.2631
J2212A-5.1MA	SIMS	Cameca 1300	N	3919.98	6.26829	7.64188	321	15.4	260	983	3.11	3.17	14.7	1.24	2.77	5.62	1.91	16.9	6.53	70.5	28.7	136	30.5	276	66.7	8553	185.692	344.014	0.539781	16.3314	0.255435	842.706	1.81786	0.599164	749.561	-1.17366	37.9957
J2212A-9.1RC	SIMS	Cameca 1300	N	3847.93	7.59794	4.82932	171	13.6	252	1453	14.1	8.67	36.5	0.374	3.2	5.91	3	33.5	14.1	140	46.6	187	33.8	264	46.8	11799	125.249	202.107	0.619718	7.8806	0.530303	828.876	4.96972	0.651822	431.504	0.992768	67.4387
J2212A-12.1MA	SIMS	Cameca 1300	Y	3955.48	13.411	-1.28064	449	13.5	4.74	1756	3	0.166	9.65	0.44	2.01	7.33	1.13	32.5	13.5	148	56.3	240	46.1	366	73.9	8183	78.6286	89.8232	0.875371	11.2615	0.404372	828.066	8.7545	0.223825	197.717	-0.633188	93.8228
J2212A-12.4RC	SIMS	Cameca 1300	Y	3965.42	12.7011	-1.36435	363	14.1	4.18	581	3.54	0.0159	8.21	0.0431	0.766	1.48	0.256	8.2	3.72	45.4	17.9	82.9	17	147	30.6	10219	48.8754	87.0067	0.561743	17.9268	0.308844	832.858	76.8937	0.22466	192.068	-0.926373	89.9446
J2212A-15.1MA	SIMS	Cameca 1300	N	3823.54	5.85862	6.43731	279	20.2	2643	2192	6.8	10.8	106	3.94	15.5	40.8	17	117	34.4	272	74.5	247	39.9	286	51.2	8827	483.328	439.648	1.09935	2.44444	0.951049	874.132	3.9841	0.752228	932.32	1.83161	24.2151
J2212A-27.1MA	SIMS	Cameca 1300	N	3816.36	7.08226	5.83794	176	8.07	18.5	411	2.38	2.59	27.2	0.991	3.64	5.62	2.11	10.7	3.54	32.2	11.9	53.4	11.9	113	27.4	9436	88.7934	236.885	0.374838	10.5607	0.284956	774.364	4.16262	0.831852	501.343	0.804996	14.5757
J2212A-29.1MA	SIMS	Cameca 1300	N	3941.76	6.50982	6.91394	429	11.8	58.5	2307	3.08	2.36	24.6	1.32	4.44	11.9	2.54	49.6	19	201	74.8	306	57.6	453	96.3	7916	192.666	254.067	0.758329	9.13306	0.443709	813.494	3.41725	0.319627	557.04	0.20924	62.161
J2212B-1.1RC	SIMS	Cameca 1300	Y	3945.85	7.54809	-0.374695	275	4.3	3.41	1530	6.93	0.467	7.67	0.576	1.53	7.51	1.21	32	12	131	49.6	233	46.7	365	81.7	8410	59.5965	77.6328	0.767672	11.4062	0.358904	715.382	3.62585	0.238624	170.41	0.0903495	103.064
J2212B-5.1MA	SIMS	Cameca 1300	Y	3962.03	6.01663	0.166507	215	3.8	4.31	1295	4.97	0.124	7.75	0.352	1.21	5.99	0.835	28.2	10.9	114	42.3	183	36.1	294	64	9662	103.474	132.322	0.781988	10.4255	0.387755	704.573	9.09503	0.196414	291.816	-0.251313	113.247
J2212B-6.1RC	SIMS	Cameca 1300	Y	3954.79	10.3563	0.180346	158	9.65	2.75	876	3.78	0.0466	5.73	0.124	0.721	3.1	0.458	17.7	7.1	75.6	28.8	121	24	198	43.7	8651	26.2877	62.043	0.423701	11.1864	0.381818	792.422	18.4814	0.189026	136.54	-0.925355	129.241
J2212B-12.2MA	SIMS	Cameca 1300	N	3925.5	12.239	10.884	127	3.99	19.7	646	6.28	2.8	6.38	0.442	0.932	3.19	1.16	12.9	4.75	51.8	18.3	89.8	20.3	184	43.8	9604	36.4935	112.172	0.325334	14.2636	0.281522	708.811	1.4061	0.55283	244.794	-0.478884	71.8176
J2212B-19.1RC	SIMS	Cameca 1300	N	3406.51	10.888	3.13442	203	29.1	1951	1004	14.5	50.4	104	10.6	14.3	18.6	7.34	35.1	11	89.5	27.3	107	22.2	199	43.7	11600	33.4283	67.5256	0.495045	5.66952	0.449749	919.32	1.10319	0.878233	128.468	3.2023	11.0706
J2212B-34.1MA	SIMS	Cameca 1300	N	3819.87	18.4815	-0.0624206	306	6.73	22.9	1390	7.53	1.29	57.9	0.975	5.78	12.7	6.66	48.8	14.9	128	40.4	157	28.9	235	52.1	6570	231.419	239.177	0.967566	4.81557	0.544681	756.642	12.658	0.817873	506.684	2.26522	32.2241
J2212B-36.1RC	SIMS	Cameca 1300	N	3391.2	6.0542	5.1183	282	12.3	452	780	5.61	7.4	12.9	0.858	1.62	4.9	0.836	17.2	6.92	68.9	23	94	18.5	149	30	10621	113.381	218.6	0.518671	8.66279	0.462416	817.946	1.25521	0.278399	414.332	-0.690663	56.5921
J2212B-38.1RC	SIMS	Cameca 1300	N	3870.54	12.5975	7.93521	90.8	4.93	3.33	350	3.13	0.0521	5.44	0.059	0.476	0.761	0.0949	4.56	2.02	24.7	10.2	46.8	10	91.4	20.8	10851	53.064	203.844	0.260316	20.0439	0.270241	727.621	24.0568	0.155745	437.976	-1.44434	84.348
J2212B-51.1RC	SIMS	Cameca 1300	N	3381.32	15.6427	3.5406	200	26.4	7794	748	24	69.2	48.9	11.4	11.5	28.9	12.7	43.3	11.5	81.7	21.4	88.8	18.6	169	35	13357	75.2625	65.6756	1.14597	3.903	0.483432	906.922	0.426862	1.09758	124.182	2.00605	9.93134
J2212B-53.1R	SIMS	Cameca 1300	N	3361.86	4.98885	10.0999	411	28.7	2582	1490	13.8	61.6	81.4	15.1	17.1	46.4	12.5	76.9	23.1	170	44.5	173	33.6	271	56	12337	15.3776	450.515	0.0341333	3.52406	0.627306	917.542	0.65438	0.639752	847.833	1.15068	13.6053
J2212B-63.1MA	SIMS	Cameca 1300	Y	3988.54	9.63486	-0.769479	165	3.96	2.41	494	3.64	0.078	2.44	0.123	0.363	1.68	0.869	8.41	3.35	36.8	14.6	71.1	16.3	153	39.3	7470	19.1728	46.5906	0.411516	18.1926	0.240523	708.153	6.10766	0.706791	103.543	-1.39423	123.282
J2212B-84.2MA	SIMS	Cameca 1300	Y	3948.02	9.94773	-0.602611	205	5.07	7.19	447	9.34	0.205	4.21	0.103	0.461	1.48	0.615	7.06	2.75	29.5	11.3	65	15.9	140	35.3	7849	50.3245	85.2985	0.589981	19.83	0.210714	730.164	7.10348	0.581655	187.354	-1.17648	83.9238
J2212B-87.2MA	SIMS	Cameca 1300	N	3953.2	6.55857	1.81729	276	8.25	13.1	848	9.42	2.63	11.6	0.663	1.66	4.87	0.782	18.4	7.05	68.2	24.2	108	21.1	171	36.4	10196	75.4281	100.169	0.75301	9.29348	0.39883	776.559	2.15381	0.252556	220.344	0.0198512	55.0884
J2212B-100.1RC	SIMS	Cameca 1300	N	3802.13	5.24595	10.2796	153	5.63	6.57	564	3.93	0.0542	7.32	0.0573	0.65	1.45	0.226	8.63	3.75	42.8	17.6	79.5	16.5	145	32.9	9573	86.5953	226.332	0.382603	16.8019	0.295172	739.798	32.2047	0.195318	477.135	-1.11856	95.3634
J2212B-101.1RC	SIMS	Cameca 1300	N	3836.06	4.92042	4.67705	226	22.1	116	1046	9.23	94.7	68	12.5	13.2	27.3	7.21	45	12.7	104	34.4	148	30.4	261	58.7	10018	131.496	201.574	0.652344	5.8	0.398467	884.939	0.484578	0.628885	428.946	1.65676	11.6883
J2212B-102.1RC	SIMS	Cameca 1300	N	3941.56	7.52096	7.1941	181	4.25	15.6	809	4.61	0.0662	4.71	0.175	0.666	3.52	0.591	16.4	6.16	67.1	23.3	106	21.9	180	39.7	8413	30.7074	78.7216	0.390076	10.9756	0.372778	714.349	10.729	0.237803	172.587	-0.757191	119.813
J2212B-109.1RC	SIMS	Cameca 1300	N	3866.57	7.72673	1.00285	152	6.6	391	853	4.87	5.64	19.6	1.02	2.5	7.05	4.49	24.2	7.94	72.7	23.6	98	19.5	158	33.7	8264	53.1817	71.1091	0.747889	6.52893	0.460127	754.774	2.00355	1.05092	152.614	1.44317	39.3921
Average g							258.5	6.5825	4.6625	998	5.2375	0.14325	6.0125	0.2545	1.011	4.12	0.86225	19.0425	7.625	82.075	31.125	139.775	28.6	238.25	53.125	8291	62.9001	88.5086	0.664714	14.9274	0.310841	742.739	7.76517	0.427171	195.107	-0.863804	103.569
2SE							128.824	4.64612	1.96573	637.806	2.85543	0.0546466	3.27933	0.167492	0.765943	2.98464	0.211038	13.1858	5.3939	58.2502	21.7927	86.0639	15.0009	110.074	18.7859	959.29	36.3496	35.0655	0.206417	4.77503	0.0993877	57.9991	1.40624	0.256028	77.036	0.518797	17.9182
Notes:
a: Pass the filter (Y) if LREE -I ≥30, La ≤0.5 ppm, Fe ≤150 ppm (if available), and discordance <5%.
b: Th and U contents were obtained during SHRIMP U-Pb dating.
c: Ti-in-zircon temperature calculated according to Ferry & Watson (2007), assuming αSiO2 = 1 and αTiO2 = 0.6.
d: Ce/Ce* = CeN/SQRT(LaN * PrN), Eu/Eu* = EuN/SQRT(SmN * GdN), all normalized to chondrite of Sun & McDonough (1989).
e: Initial U (Ui) and ΔFMQ calculated according to Loucks et al. (2020).
f: LREE - I = Dy/Sm + Dy/Nd, according to Bell et al (2016).
g: Only analyses on magmatic zircons and passing the filter (highlighted in grey) were used to caculate average and 2SE.
h: The Ti and Y contents in some analyses are missing because the corresponding peaks for Ti and Y were lost during the analysis process of these spots.
References:
Bell, E.A., Boehnke, P., Harrison, T.M., 2016. Recovering the primary geochemistry of Jack Hills zircons through quantitative estimates of chemical alteration. Geochimica et Cosmochimica Acta 191, 187-202.
Ferry, J.M., Watson, E.B., 2007. New thermodynamic models and revised calibrations for the Ti-in-zircon and Zr-in-rutile thermometers. Contributions to Mineralogy and Petrology 154, 429-437.
Loucks, R.R., Fiorentini, M.L., Henríquez, G.J., 2020. New Magmatic Oxybarometer Using Trace Elements in Zircon. Journal of Petrology 61.
Sun, S.-S., McDonough, W.F., 1989. Chemical and isotopic systematics of oceanic basalts: implications for mantle composition and processes. Geological Society, London, Special Publications 42, 313-345.

## Sheet: Table S5
Table S5 Magmatic water contents in the 3.95 Ga trondhjemitic gneiss and source a
	NBO/T b		Ce4+/Ce3+Melt		T (K)		Δ FMQ		logfO2		H2O (mol.%) c			H2O (wt.%)			Ce (ppm) in rocks	Ce (ppm) in source e	H2O contents in source e
	Value	2SE	Value	2SE	Value	2SE	Value	2SE	Value	2SE	Value	2SE d	2SE (total) d	Value	2SE	2SE (total)	Value	Value	Value
J2302	0.0695861	0.127833	0.000338143	6.40637e-05	1052.56	60.1387	-0.600891	0.701591	-15.801	0.701591	0.251192	0.0454909	0.0995209	9.1201	1.65165	3.61333	69.5235	10.3	1.35116
J2303	0.0366177	0.131648	0.00040673	9.66121e-05	974.329	23.2014	-0.481889	0.589038	-17.5814	0.589038	0.235481	0.038193	0.0670111	8.46995	1.37376	2.41031	47.2084	10.3	1.84799
J2212 f	0.0529518	0.129736	0.000331326	0.000234532	1027.67	71.6854	-0.863804	0.518797	-16.6363	0.518797	0.237233	0.0336386	0.138276	8.50414	1.20585	4.9568	58.3659	10.3	1.50075
Notes:
a: These values were cauculated using the whole-rock element composition (Table S6) and the averages of zircon trace elements (Table S4), based on the supplementary file "Zircon oxybarometer - hygrometer" attached in Ge et al. (2023).
b: NBO/T is the proportion of non-bridging oxygens to tetrahedrally coordinated cations.
c: The preferential U loss was corrected assuming Th/U = 5, according to the composition median of the global TTGs (Ge et al., 2023).
d: 2SE is the error calculated only when considering oxygen fugacity, while 2SE (total) is the error calculated when considering various factors
e: Considering that the H2O/Ce ratio is constant during partial melting process, the H2O contents in source were caculated using the Ce contents of the 3.95 Ga trondhjemitic gneiss and the source (amphibolite group I in Acasta, Table S7), and magmatic H2O contents calculated using hygrometer (Ge et al., 2023).
f: The whole rock geochemistry of sample J2212 may have been affected by intrusive veins, thus, the average value of J2302 and J2303 was used for calculating the H2O content in magma.

## Sheet: Table S6
Table S6 Whole-rock geochemical composition of the 3.95 Ga trondhjemitic gneiss in the Labashan area, eastern Hebei, North China Craton, and literature data for the oldest (>3.7 Ga) granotoids around the world (Major elements in wt.% oxides and trace elements in ppm)
Area	Eastern Hebei	Eastern Hebei	Eastern Hebei		Eastern Hebei	Eastern Hebei	Eastern Hebei	Eastern Hebei	Eastern Hebei	Eastern Hebei	Eastern Hebei	Eastern Hebei	Eastern Hebei	Eastern Hebei	Eastern Hebei		Anshan	Anshan	Anshan	Anshan	Anshan	Anshan	Anshan	Anshan	Anshan	Anshan	Anshan	Anshan	Anshan	Anshan	Anshan	Anshan	Anshan	Anshan	Anshan	Anshan	Anshan	Anshan	Anshan	Anshan	Anshan	Anshan	Anshan		Tarim	Tarim	Tarim	Tarim	Tarim
Sample No. a	J2302	J2303	J2212		J2117	J2006	J2120	J2206	J2115	J2215	J2012	J2013	J2111	J2231	J2216		A9011	A0518	Ch28	A0507	A9303	A9505-3	A9604	A9915	A9917	A9158	A9160	A9505-2	A9208-2	A9606	A9921	A0008	A9616c	A9616f	A9616	A0022	A0512	A0514(1)	A1613	A1710	C209-8(1)-A	C209-8(2)-A	C209-8(3)-A		15ALT10-A	16ALT01-1-A	16ALT01-2-A	16ALT01-3-A	16ALT04-1-A
Lithology	Trondhjemitic gneiss	Trondhjemitic gneiss	Banded trondhjemitic gneiss		Banded trondhjemitic gneiss	Banded trondhjemitic gneiss	Banded trondhjemitic gneiss	Banded trondhjemitic gneiss	Banded granodioritic gneiss	Granodioritic gneiss	Granodioritic gneiss	Granodioritic gneiss	Quartz monzonite gneiss	Banded monzogranitic gneiss	Syenogranitic gneiss		Trondhjemitic gneiss	Trondhjemitic gneiss	banded trondhjemite	banded trondhjemite	Trondhjemitic gneiss	Trondhjemitic gneiss	Quartz dioritic gneiss	Quartz dioritic gneiss	Quartz dioritic gneiss	Trondhjemitic gneiss	Trondhjemitic gneiss	Trondhjemitic gneiss	Trondhjemitic gneiss	Trondhjemitic gneiss	Trondhjemitic gneiss	Trondhjemitic gneiss	Trondhjemitic gneiss	Trondhjemitic gneiss	Trondhjemitic gneiss	Trondhjemitic gneiss	Banded trondhjemite	Gray portion of banded trondhjemite	Trondhjemitic gneiss	Trondhjemitic gneiss	Trondhjemitic gneiss	Trondhjemitic gneiss	Trondhjemitic gneiss		Tonalitc gneiss	Tonalitc gneiss	Tonalitc gneiss	Tonalitc gneiss	Tonalitc gneiss
Age (Ma)	3951	3951	3951		3754	3804	3819	3838	3774	3773	3786	3773	3775	3782	3786		3804	3800	3811	3791	~3.8 Ga	~3.8 Ga	3800	3800	3800	3800	3800	3800	3800	3800	3800	3800	3800	3800	3800	3800	3773	3779	3800	3789	3814	3814	3814		3713	3713	3713	3713	3713
Location	Labashan	Labashan	Labashan		Labashan	Labashan	Labashan	Labashan	Labashan	Labashan	Labashan	Labashan	Labashan	Labashan	Labashan		Baijiafeng	Baijiafeng	Dongshan	Dongshan	Baijiafeng	Baijiafeng	Dongshan	Dongshan	Dongshan	Baijiafeng	Baijiafeng	Baijiafeng	Dongshan	Dongshan	Dongshan	Dongshan	Dongshan	Dongshan	Dongshan	Eryijiu Garden	Shengousi	Shengousi	Hujiamiao	Hujiamiao	Guodishan	Guodishan	Guodishan		Aktash Complex	Aktash Complex	Aktash Complex	Aktash Complex	Aktash Complex
Reference	This study	This study	This study		Dong CY et al., 2024	Dong CY et al., 2024	Dong CY et al., 2024	Dong CY et al., 2024	Dong CY et al., 2024	Dong CY et al., 2024	Dong CY et al., 2024	Dong CY et al., 2024	Dong CY et al., 2024	Dong CY et al., 2024	Dong CY et al., 2024		Song et al., 1996	Nutman et al., 2009	Song et al., 1996	unpublished data	Wan et al., 2005	Wan et al., 2005	Wan et al., 2005	Wan et al., 2005	Wan et al., 2005	Wan et al., 2005	Wan et al., 2005	Wan et al., 2005	Wan et al., 2005	Wan et al., 2005	Wan et al., 2005	Wan et al., 2005	Wan et al., 2005	Wan et al., 2005	Wan et al., 2005	Wan et al., 2005	Wan et al., 2012	Wan et al., 2012	Wan YS et al., 2023	Wan YS et al., 2023	Wang et al., 2015	Wang et al., 2015	Wang et al., 2015		Ge RF 2018	Ge RF 2018	Ge RF 2018	Ge RF 2018	Ge RF 2018
SiO2	70.3717	72.6095	70.513		71.84	70.4	68.18	72.5	65.74	63.63	62.46	66.89	66.22	75.81	74.35		74.29	74.39	73.59	61.16	74.4	75.84	57.88	64.68	67.77	76.59	72.14	73.43	67.72	73.94	71.16	70.04	73.61	71.47	72.54	72.38	70.53	70.89	75.4	72.37	71.9567	72.925	70.73		64.7197	66.3988	67.99	66.845	62.9019
TiO2	0.2219	0.1563	0.211		0.16	0.28	0.37	0.25	0.68	0.61	0.91	0.63	0.46	0.07	0.04		0.1	0.08	0.07	0.41	0.05	0.02	0.61	1.57	1.05	0.1	0.12	0.09	0.13	0.1	0.32	0.17	0.1	0.24	0.17	0.15	0.28	0.25	0.1	0.25	0.243333	0.185	0.23		0.4959	0.513696	0.443808	0.464256	0.510144
Al2O3	16.6769	15.522	15.151		15.72	15.15	15.6	13.85	15.42	14.82	15.94	15.1	12.37	13.19	13.67		15.62	14.73	14.59	18.62	14.66	13.77	18.99	14.01	13.49	13.97	16.25	14.05	17.95	14.73	15.61	16.46	14.69	15.08	14.89	15.35	15.61	15.93	14.45	15.26	15.38	15.215	15.685		16.2178	16.0219	16.0513	16.5556	17.8034
Fe2O3 b	1.4635	1.2086	1.767		1.1	2.21	1.64	1.05	5.49	5.58	5.6	2.42	3.55	0.65	0.33		0.21	0.52	0.54	3.14	0.85	0.34	5	7.00746	5.18	1.28788	1.30007	1.0645	1.71252	1.1735	2.54245	1.98247	1.0835	2.64363	1.86356	1.76013	2.93824	2.48586	0.63	0.98	2.50333	2.13	3.315		4.21292	4.4459	3.4791	3.72441	4.14879
FeO					0.18	0.28	1.9	1.3	0.3	0.48	0.35	1	1.4	0.28	0.18		0.92	0.4	0.56	1.8	0.18	0.13																	0.4	0.59
MnO	0.0107	0.0115	0.017		0.02	0.03	0.05	0.03	0.07	0.07	0.06	0.03	0.04	0.01	0.01		0.03	0.01	0.03	0.1	0.03	0.02	0.15	0.1	0.07	0.03	0.04	0.03	0.05	0.05	0.04	0.03	0.06	0.1	0.08	0.03	0.03	0.04	0.03	0.02	0.04	0.03	0.04		0.05975	0.0523	0.0396	0.0435	0.0664
MgO	0.6202	0.4059	1.39		0.35	2.36	1.55	1.19	1.85	3.86	3.3	3.92	6.38	0.36	0.19		0.22	0.16	0.34	2.02	0.14	0.02	2.65	1.33	1.8	0.41	0.42	0.13	0.99	0.51	0.54	0.94	0.25	0.67	0.46	1.13	1.33	0.81	0.53	0.61	0.603333	0.45	0.55		2.0344	1.70485	1.41822	1.47564	2.22314
CaO	1.8308	1.6214	1.132		1.65	2.22	2.5	2.22	2.12	2.81	2.77	2.79	1.49	0.99	0.94		1.48	1.46	1.08	2.72	0.82	0.44	4.52	3.62	3.55	0.33	0.92	1.19	1.98	2	2.1	2.54	1.01	1.23	1.12	0.29	0.49	0.65	0.72	2.01	2.54667	2.57	2.75		4.42935	3.78184	3.76428	3.90435	4.87124
Na2O	5.1519	5.5837	4.198		5.01	4.79	4.09	3.59	3.18	2.57	2.64	1.83	0.91	3.12	2.4		4.72	5.71	4.2	4.38	4.28	3.79	5.56	3.14	3.42	4.25	4.57	5.2	5.55	5.39	4.7	6.26	5.22	4.47	4.84	4.53	5.18	5.6	5.72	5.31	5.17333	4.965	5.09		4.3914	4.3262	4.3064	4.4527	4.4102
K2O	2.0276	1.803	3.356		2.48	1.08	2.02	2.36	2.16	2.5	2.97	1.64	2.33	4.47	6.64		1.88	1.04	3.52	3.09	4.71	5.68	2.53	2.43	1.87	2.22	2.65	1.79	1.97	1.07	1.9	1.45	2.5	2.32	2.41	2.6	2	2.37	1.52	1.39	1.28	1.215	1.345		1.6107	1.4657	1.5234	1.4783	1.2886
P2O5	0.0545	0.034	0.044		0.03	0.12	0.16	0.11	0.14	0.04	0.21	0.03	0.03	0.02	0.02		0.01	0.01	0.02	0.11	0.03	0.01	0.2	0.37	0.3	0.03	0.03	0.03	0.04	0.03	0.08	0.03	0.03	0.06	0.05	0.01	0.08	0.06	0.02	0.07	0.0866667	0.09	0.09		0.231327	0.164025	0.115367	0.147911	0.232022
LOI	1.087	0.652	1.425		0.73	1.36	1.08	0.6	2.4	2.45	2.27	2.84	3.87	0.54	0.47						0.6	0.41	0.9	1.32	1.18	0.9	1.06	2.86	1.18	0.6	0.88	0.92	0.64	1.34	0.99	1.74	1.28	1.18			0.76	0.81	0.83		1.13	0.77	0.72	0.95	1.57
Total	99.5167	99.6079	99.204		99.29	100.3	99.36	99.2	99.58	99.46	99.52	99.22	99.2	99.54	99.23		99.48	98.51	98.54	97.55	100.8	100.5	98.99	99.5775	99.68	100.118	99.5001	99.8645	99.2725	99.5935	99.8724	100.822	99.1935	99.6236	99.4136	99.9701	99.7482	100.266	99.52	98.86	100.573	100.585	100.655		99.5332	99.6453	99.8515	100.042	100.026
Cr	22.4574	38.552	17.3097		5	36	47	42	14	34	52	37	36	32	18		18	4.73	21	29.6	30	30		10	13	18	23	18	41		10	34				35	10	10	21.8	10	4.8	5	2.5		32.5224	19.7	17.4	17.4	34.3578
Ni	7.38555	3.16603	3.81883		3	22	16	11	16	26	68	85	83	11	2																								8.83	7.16					30.4919	19.2	16.7	18.4	52.3373
Sc	1.43383	0.78875	1.62319		1	5	5	4	10	8	12	6	8	1	1			0.77		6.68																	3	3	2.02	2.24	1.6	1	1.5		4.67698	10.5	7.78	9.99	5.60744
Rb	67.5201	40.9063	72.588		59	49	154	160	154	211	333	73	115	175	133		70	48.2	173	239	103	96	216	234	180	107	118	68	139	55	132	72	101	151	126	84	125	116	36.8	38.8	101.8	40.5	90		64.3022	22.3	24.4	22.1	22.2863
Ba	412.858	444.139	565.711		1193	220	565	1379	548	521	421	210	205	757	1360		729	457	888	563	541	377	313	539	435	625	679	521	648	278	512	457	941	695	818	1318	410	693	654	562	225	168.5	225		842.922	952	1029	967	1153.44
Sr	757.477	660.198	392.776		742	178	498	456	193	198	207	157	79	120	179		376	497	213	242	192	73	371	267	317	109	285	272	280	242	284	358	292	280	286	110	95	160	162	211	354.8	300	378		672.82	548	557	528	707.9
Nb	1.70098	1.43345	2.08716		1.42	4.33	12.64	4.1	14.25	12.71	12.82	4.8	8.63	5.38	1.3		2	2.82	2	9.31	6	2	5	26	16	3	3	2	3	2	9	7	2	2		8	12	13	2.16	3.1	3.786	4.83	12.65		4.05052	3.41	2.69	2.84	2.9843
Ta	0.0808026	0.057012	0.0663811		0.25	0.17	0.43	0.28	0.89	0.49	0.97	0.12	0.49	0.61	0.08			0.25		0.86																	2	2	0.14	0.23	0.288	0.375	0.52		0.176457	0.18	0.15	0.12	0.0878456
Hf	3.31208	3.03505	3.73592		3.3	2.67	3.39	2.39	7.94	7.48	7.87	7.39	5.81	1.79	1.23			2.28		3.06																	4	4	1.55	4.53	3.23	3.16	3.105		4.66761	4.51	4.04	4.48	3.45429
Zr	130.175	111.835	158.862		127	102	123	91	337	302	334	299	225	53	32		103	71.7	42	107	35	31	157	72	292	101	88	41	123	27	147	57	25	106	65.5	88	138	127	51.9	180	134.8	134	129.5		202.391	174	155	177	145.418
Y	5.10103	3.63071	6.25638		2.64	9.22	10.57	6.37	27.33	21.32	23.22	5.82	6.76	7.52	4.25		3	4.82	7	2.42		11	39	31	32	5	3	5	6	8	7	4	10	17	14	5	11	7	1.73	3.66	6.56	5.05	6.05		6.47884	5.38	4.37	5.09	4.05736
Th	6.10965	5.4671	9.13129		12.68	6.61	3.64	8.61	7.71	13.46	8.07	18.74	12.55	15.33	6.28		5	1.63	5	0.58	2	7	5	8	5	10	5	5	4	5	5	5	7	10	9	5	4.2	2.5	6.59	8.67	4.802	3.235	7.06		0.769094	3.33	3.19	4.53	0.133755
U	0.903759	0.668964	0.770872		0.81	0.56	1.11	0.73	1.77	1.53	1.31	1.23	1.46	1.07	0.52			2.84		34.6																	1.1	0.5	0.7	1.07	0.524	0.56	1.22		0.589551	0.15	0.12	0.14	0.121071
La	46.5311	33.1106	37.2441		26.71	27.88	26.62	33.55	35.52	35.21	29.86	44.08	19.62	18.35	10.88		6.55	5.99	13.19	25	2.62	5.14	40.43	23.72	23.11	10.44	3.93	3.19	8.81	10.06	12.17	4.27	12.01	28.44	20.23	13.95	16.5	11.5	8.85	19.2	18.08	14.55	11.8		24.4618	45.0735	39.047	52.5152	20.354
Ce	69.5235	47.2084	60.6764		48.32	47	43.72	54.04	60.32	71.51	54.71	75.96	37.39	27.19	19.28		9.59	7.16	22.83	27.8	4.32	7.5	79.09	40.92	42.53	19.46	5.86	3.53	17.2	20.12	16.08	5.56	24.06	56.88	40.47	22.63	27.2	21.4	14.6	26.9	19.72	19	19.2		42.3721	73.906	61.1942	83.5772	35.4797
Pr	7.47805	5.47819	6.37989		4.29	4.94	4.82	5.78	7.31	6.89	6.68	7.63	3.87	3.42	2.1		2.45	1.1	1.75	4.62	0.3	0.87	7.5	4.15	4.28	1.63	0.5	0.5	1.2	1.54	1.41	0.72	1.86	4.58	3.22	2.2	2.81	1.98	1.25	2.81	3.084	2.605	2.2		4.55326	7.43835	6.06645	8.31193	3.64229
Nd	23.7344	17.3042	22.0653		14.19	17.87	16.91	20.05	26.87	24.41	25.4	25.38	13.52	12.04	7.14		5.4	3.88	8.47	17.8	1.9	3.39	28.55	22.03	22.31	5.85	1.91	2.03	5.26	5.8	5.78	2.58	5.85	15.7	10.77	7.7	9.48	7.36	5.01	8.38	10.56	8.8	7.45		17.0958	24.367	19.2458	26.2898	12.7511
Sm	3.45022	2.52353	3.23873		2.11	3.03	2.95	3.42	5.56	4.52	5.36	3.94	2.39	2.11	1.39		1.78	0.79	1.86	4.47	0.51	0.89	8	5.19	5.48	1.09	0.59	0.4	1.04	1.32	1.18	0.65	1.44	3.43	2.44	1.71	1.8	1.5	0.76	1.29	1.916	1.56	1.405		2.77582	2.9806	2.2496	3.07193	1.7476
Eu	0.819264	0.85651	0.868124		0.7	0.84	0.78	1.03	1.22	1.01	1.06	0.87	0.55	0.61	0.78		0.46	0.33	0.59	1.42	0.26	0.27	2.35	1.9	2.02	0.49	0.29	0.23	0.56	0.72	0.67	0.58	0.76	0.97	0.87	0.43	0.33	0.53	0.32	0.57	0.508	0.425	0.445		0.824812	0.966663	0.920329	0.954636	0.781281
Gd	2.20616	1.5653	2.22094		1.18	2.37	2.46	2.43	5.22	3.86	4.91	2.47	1.87	1.85	1.15		1.56	0.68	1.37	5.1	0.7	0.93	7.26	6.06	6.91	1.35	0.68	0.56	0.91	1.2	1	0.71	1.87	3.14	2.5	1.6	1.8	1.37	0.53	0.95	1.566	1.195	1.23		2.18391	2.18132	1.72145	2.26116	1.33355
Tb	0.244028	0.174705	0.259172		0.14	0.33	0.34	0.28	0.83	0.6	0.75	0.29	0.28	0.27	0.16		0.3	0.1	0.3	0.98	0.08	<0.30	1.3	0.97	1.04	0.3	0.3	0.3	0.3	0.3	0.3	0.12	0.32	0.56	0.44	0.3	0.3	0.22	0.07	0.12	0.222	0.165	0.185		0.278378	0.2685	0.2005	0.2715	0.162786
Dy	1.09931	0.785613	1.31816		0.6	1.69	1.91	1.37	4.73	3.53	4.25	1.34	1.51	1.53	0.84		0.76	0.6	1.06	6.08	0.75	1.18	7.44	5.53	5.94	0.93	0.37	0.46	0.88	1.07	1.15	0.72	0.95	2.18	1.57	1.2	1.8	1.27	0.34	0.51	1.166	0.915	1.04		1.39316	1.0335	0.7775	1	0.709885
Ho	0.184481	0.133636	0.212935		0.1	0.3	0.37	0.21	0.96	0.68	0.81	0.21	0.28	0.25	0.16		0.2	0.11	0.26	1.26	0.17	0.25	1.45	1.22	1.24	0.2	0.18	0.1	0.14	0.22	0.24	0.16	0.26	0.46	0.36	0.2	0.37	0.25	0.06	0.09	0.224	0.175	0.21		0.250237	0.1715	0.1305	0.159	0.123144
Er	0.433058	0.297151	0.531462		0.22	0.81	0.96	0.52	2.66	2.25	2.44	0.55	0.78	0.71	0.37		0.49	0.34	0.71	3.76	0.33	0.81	3.93	3.33	3.41	0.37	0.14	0.33	0.58	0.72	0.74	0.44	0.69	1.37	1.03	0.66	1.14	0.77	0.18	0.26	0.534	0.42	0.505		0.692364	0.467	0.371	0.4565	0.357376
Tm	0.0602828	0.0396983	0.0613189		0.02	0.1	0.13	0.07	0.39	0.32	0.34	0.08	0.12	0.1	0.05		0.1	0.05	0.1	0.56	0.09	0.12	0.59	0.45	0.45	0.1	0.1	0.1	0.1	0.1	0.1	0.08	0.12	0.2	0.16	0.1	0.18	0.12	<0.05	<0.05	0.078	0.065	0.08		0.0836406	0.0545	0.047	0.0495	0.0434358
Yb	0.331976	0.222443	0.370194		0.16	0.61	0.82	0.42	2.47	2.24	2.33	0.57	0.85	0.64	0.28		0.41	0.34	0.59	3.68	0.51	0.8	3.81	2.88	2.73	0.47	0.27	0.34	0.59	0.74	0.63	0.53	0.9	1.49	1.2	0.54	1.19	0.92	0.16	0.26	0.454	0.4	0.48		0.518718	0.307	0.269	0.277	0.260842
Lu	0.0507857	0.0349834	0.0563077		0.03	0.09	0.11	0.06	0.38	0.35	0.34	0.1	0.14	0.1	0.04		0.1	0.05	0.3	0.56	0.09	<0.10	0.56	0.41	0.47	0.1	0.11	0.1	0.1	0.1	0.12	0.09	0.15	0.2	0.18	0.1	0.18	0.15	<0.05	<0.05	0.07	0.06	0.075		0.0789676	0.05	0.0445	0.0455	0.0413936
Li	16.6364	12.412																																											4.68315	1.92	3.2	2.57	6.19349
Be	1.62749	1.01547																																											1.03104	0.94	0.89	0.93	0.941059
V	13.6987	9.51336																																							18.6	11.5	15.5		58.0543	56.1	41.5	50.3	58.7257
Co	2.32966	1.71337																																							4.12	3.05	4.1		14.0314	11.7	9.54	10.7	14.4765
Cu	9.43407	2.51216																																											46.1666	27.7	22.8	29.7	30.6195
Zn	16.8471	15.7005																																											61.7104	58.7	47.2	49.4	48.7515
Ga	19.931	17.4196																																							17.24	16.15	20.9		18.9817	18.1	17.1	18.2	18.4331
Mo																																													0.32075	0.1	0.11	0.0934891	0.1
Cd																																													0.0736596	0.060204	0.051615	0.0420291	0.0615978
Cs	1.15053	0.494309																																							5.896	4.17	6.735		0.809103	0.44	0.47	0.42	0.430304
Tl	0.29225	0.153593																																											0.378961	0.23	0.22	0.21	0.196904
Mn																																													427.97	383	270	306	475.389
Sn	0.877121	0.498788																																											0.758722	0.36	0.28	0.28	0.486716
Sb
W																																													0.0990767	0.0240816	0.0289044	0.0221422	0.025043
Ge
Ti																							3656.95	9412.15	6294.75	599.5	719.4	539.55	779.35	599.5	1918.4	1019.15	599.5	1438.8	1019.15	899.25	1678.6	1498.75			1458.78	1109.07	1378.85		2917.76	3096	2612	2680	3044.75
As
Se
Pb	15.3438	15.7438																																							13.54	12.45	16.6		12.0829	11.5	10.7	9.44	9.1437
Bi																																													0.0215	0.04469	0.0422042	0.0424256	0.0385088
S
Totel REE	156.096	109.7	135.447		98.74	107.77	102.79	123.17	154.06	157.03	138.9	163.37	83.03	69.07	44.58		30.05	21.47	53.08	102.53	12.54	22.15	191.7	118.35	121.45	42.68	15.12	12.07	37.57	43.91	41.45	17.12	51.09	119.4	85.26	53.22	64.9	49.19	32.13	61.34	58.112	50.275	46.23		97.4841	159.215	132.24	179.195	77.747
LaN/YbN c	100.539	106.77	72.1653		119.744	32.7841	23.286	57.2986	10.3152	11.2751	9.19252	55.4712	16.557	20.5663	27.8722		11.4593	12.6371	16.0359	4.87296	3.68495	4.60865	7.61166	5.90776	6.07209	15.9332	10.4407	6.72996	10.7109	9.7514	13.8564	5.779	9.57196	13.6913	12.0925	18.5302	9.94575	8.96624	39.6756	52.9698	28.5656	26.0918	17.6336		33.8266	105.313	104.12	135.99	55.9724
Eu/Eu* c	0.907832	1.31751	0.989577		1.35625	0.958313	0.885196	1.09231	0.692326	0.739234	0.631693	0.852602	0.795365	0.943901	1.88609		0.843935	1.37648	1.12995	0.909229	1.33034	0.9073	0.94271	1.03576	1.00357	1.23492	1.39972	1.48569	1.75984	1.74895	1.88563	2.61015	1.41591	0.903615	1.07691	0.794756	0.560486	1.1303	1.54145	1.57413	0.89659	0.951626	1.03489		1.02415	1.15901	1.42977	1.10736	1.56461
GdN/YbN c	5.49753	5.82125	4.963		6.10097	3.21407	2.48175	4.78624	1.74828	1.42553	1.74326	3.58475	1.81995	2.39127	3.39764		3.14759	1.6545	1.9209	1.14646	1.13544	0.961679	1.57634	1.74067	2.09388	2.37615	2.08345	1.36253	1.27593	1.34149	1.3131	1.1082	1.71884	1.74333	1.72344	2.45111	1.2513	1.23188	2.74027	3.02265	2.85347	2.47141	2.11983		3.48289	5.87784	5.29394	6.75287	4.22929
Notes:
a: The sample number with suffix "A" is the average value of multiple analyses of the samples.
b: If the line of FeO is empty, the value in this line refers to the content of Fe2O3T, otherwise it refers to the content of Fe2O3.
c: All values are normalized to chondrite values of Sun and McDonough (1989), Eu/Eu* = EuN/SQRT(SmN*GdN);
[truncated: 89 more columns]

## Sheet: Table S7
Table S7 The geochemical composition of ≥3.7 Ga mafic rocks around the world
Rock type	Sample number	SiO2	TiO2	Al2O3	Fe2O3	MnO	MgO	CaO	Na2O	K2O	P2O5	LOI		Cr	Co	Ni	Rb	Sr	Ba	Ga	Pb	Sc	V	Nb	Zr	Hf	Th	Y	La	Ce	Pr	Nd	Sm	Eu	Gd	Tb	Dy	Ho	Er	Tm	Yb	Lu	Cs	U	Ta	Be	Bi	Cu	Zn
Isua-depleted	462901	49.08	0.23	16.94	10.12	0.17	15.57	6.82	0.95	0.09	0.01	4.38		951	63	376	7.1	54	8	12	3.1	42	192	0.153	16.4	0.583	0.078	9.2	0.459	1.257	0.202	1.1	0.442	0.129	0.692	0.156	1.332	0.369	1.361	0.208	1.49	0.24
Isua-depleted	462904	48.62	0.2	14.09	10.68	0.24	12.46	12.82	0.76	0.11	0.01	1.7		1922	68	560	1.9	40	6	11	2.3	37	161	0.243	16.5	0.538	0.135	9	1.032	2.476	0.349	1.664	0.615	0.196	0.879	0.177	1.358	0.349	1.303	0.206	1.447	0.217
Isua-depleted	462905	49.39	0.24	16.9	10.4	0.16	15.96	5.23	1.62	0.07	0.01	5.7		1114	72	412	2.7	68	8	13	2.8	45	208	0.219	15.9	0.529	0.055	9.2	0.471	1.274	0.197	1.02	0.438	0.189	0.744	0.158	1.363	0.396	1.464	0.221	1.47	0.224
Isua-depleted	462945	50.4	0.33	18.09	11.26	0.2	9.1	8.66	1.84	0.11	0.02	2.62		209	53	102	1.6	74	10	14	2.62	45	220	0.329	21.6	0.795	0.17	9.4	0.672	1.83	0.276	1.38	0.551	0.231	0.856	0.177	1.442	0.36	1.274	0.194	1.337	0.22
Isua-depleted	462945a																								23	0.735	0.166	9.2	0.659	1.776	0.266	1.365	0.538	0.223	0.834	0.169	1.395	0.348	1.246	0.187	1.31	0.214
Isua-depleted	462945b	50.13	0.32	17.96	11.12	0.19	8.97	8.54	2.6	0.14	0.02	2.63		196	44	103	5.1	76	12	15		43	212	0.533	23.6		0.168	10	0.676	1.823	0.273	1.401	0.552	0.229	0.856	0.174	1.431	0.357	1.278	0.192	1.344	0.22
Isua-depleted	462946	51.57	0.36	18.34	10.62	0.17	8.46	7.11	3.24	0.1	0.02	1.72		204	49	96	1.2	118	17	15	4.2	39	189	0.584	23.4	0.919	0.197	10.8	1.039	2.54	0.367	1.857	0.687	0.22	1.057	0.209	1.721	0.462	1.679	0.249	1.653	0.245
Isua-depleted	462946b	51.65	0.35	18.46	10.41	0.13	8.49	6.98	3.4	0.11	0.02	1.72		201	44	98	4.1	118	19	15		39	191	0.651	25.4		0.198	12	1.104	2.633	0.42	1.87	0.682	0.204	1.053	0.216	1.75	0.429	1.44	0.242	1.541	0.222
Isua-depleted	462948	54	0.4	17.74	9.3	0.13	7.05	8.39	2.85	0.12	0.02	1.76		141	35	69	4.3	116	14	15	3.91	45	195	0.552	27.5	1.084	0.229	13	1.262	3.084	0.459	2.278	0.912	0.283	1.318	0.262	2.039	0.537	1.914	0.281	1.832	0.278
Isua-depleted	462948b	54.05	0.4	17.78	9.26	0.13	6.96	8.35	2.91	0.12	0.02	1.76		136	37	70	3.1	110	19	15		43	189	0.783	30.5		0.24	14	1.358	3.312	0.516	2.463	0.812	0.287	1.339	0.268	2.073	0.501	1.658	0.259	1.793	0.269
Isua-depleted	462949	49.46	0.37	18.54	11.49	0.18	9.11	7.66	3.06	0.11	0.02	2.63		183	61	108	0.4	117	12	16	2.9	36	306	0.739	23.6	0.934	0.209	11.2	1.066	2.397	0.367	1.819	0.637	0.227	1.037	0.21	1.75	0.477	1.726	0.26	1.731	0.257
Isua-depleted	462949b	49.57	0.38	18.58	11.35	0.16	9.09	7.62	3.12	0.11	0.02	2.64		199	47	104		115	11.5	15		41	212	1.105	26.7	0.79	0.185	12	1.047	2.361	0.38	1.919	0.626	0.267	1.047	0.205	1.694	0.431	1.427	0.236	1.683	0.257
Isua-depleted	462965	47.92	0.23	16	10.8	0.21	13.56	9.82	1.33	0.13	0.01	3.32		1240	77	455	3.2	52	14	14	1.27	45	229	0.131	14	0.509	0.043	9.3	0.307	0.855	0.138	0.764	0.351	0.191	0.605	0.138	1.249	0.345	1.294	0.199	1.374	0.212
Isua-depleted	462967	50.11	0.27	19.83	10.62	0.12	10.69	6.55	1.51	0.28	0.01	4.18		73	59	128	13.2	65	68	13	2.99	32	200	0.209	17	0.617	0.055	10.3	0.525	1.353	0.205	1.07	0.437	0.172	0.752	0.173	1.461	0.396	1.455	0.221	1.523	0.231
Isua-depleted	462968	49.69	0.27	19.91	8.98	0.18	6.76	10.17	2.8	1.22	0.02	1.55		61	49	133	22.9	69	135	14	7.76	26	220	0.508	18.8	0.62	0.088	11.4	0.739	1.886	0.281	1.414	0.515	0.197	0.879	0.195	1.664	0.441	1.649	0.253	1.773	0.285
Isua-depleted	242670	50.04	0.31	18.72	10.84	0.23	8.9	9.42	0.08	1.24	0.21	1.02		257	63	179	4.9	75	11	15	3.39		211	0.801	26	1.012	0.325	11.3	1.826	4.212	0.571	2.635	0.848	0.279	1.141	0.228	1.773	0.446	1.615	0.243	1.668	0.275
Isua-depleted	242744	51.3	0.4	18.27	11.83	0.17	8.25	7.56	0.15	1.85	0.21	2.48		57	47	61	3.4	86	23	14	1.25		239	0.559	23.3	0.876	0.218	12.9	1.149	2.878	0.427	2.113	0.781	0.264	1.221	0.264	2.12	0.527	1.892	0.279	1.84	0.288
Isua-depleted	242671B	49.71	0.29	18.29	11.18	0.19	9.63	9.06	0.02	1.44	0.18	0.4		3	63	161	1.51	54	3.7	14	2.68		212	0.642	29.5	0.991	0.29	11.9	1.559	3.839	0.532	2.473	0.852	0.288	1.146	0.235	1.857	0.464	1.708	0.254	1.747	0.282
Isua-depleted	242742	48.74	0.22	20.24	9.01	0.13	11.26	8.35	0.1	1.74	0.21	3.4		371	46	154	1.3	75	10	12	1.09		205	0.398	18	0.58	0.221	8.4	1.055	2.39	0.331	1.551	0.519	0.183	0.76	0.158	1.274	0.327	1.185	0.179	1.237	0.193
Isua-depleted	242742a																								18	0.579	0.222	8.4	1.064	2.435	0.329	1.582	0.548	0.179	0.765	0.156	1.267	0.329	1.183	0.176	1.226	0.193
Isua-depleted	242689	49.24	0.3	18.01	11.14	0.22	9.47	9.43	0.1	1.9	0.19	0.96		366	67	176	6.8	53	2	15	3.9		240	0.406	24.4	0.849	0.237	10.9	1.015	2.827	0.416	1.999	0.68	0.253	1.041	0.211	1.7	0.425	1.533	0.23	1.578	0.255
Isua-depleted	242689a																								24.1	0.841	0.235	10.8	1.005	2.8	0.412	1.98	0.674	0.25	1.031	0.209	1.684	0.421	1.519	0.227	1.563	0.253
Isua-depleted	242733	50.02	0.37	17.77	11.23	0.15	9.58	8.85	0.1	1.7	0.23	2.71		109	55	125	1	58	5	14	1.03		236	0.401	19.8	0.555	0.044	13.7	0.581	1.931	0.334	1.962	0.656	0.222	1.077	0.222	1.598	0.421	1.318	0.231	1.395	0.23
Isua-depleted	242719C	47.78	0.24	17.29	9.37	0.21	11.62	12	0.04	1.21	0.24	2.38		930	63	375	1.2	118	10	11	4.01		187	0.255	13.2	0.379	0.054	10.3	0.378	1.055	0.2	1.096	0.423	0.149	0.762	0.14	1.229	0.312	0.99	0.157	1.225	0.219
Isua-depleted	242718	49.56	0.23	16.88	10.46	0.17	13.91	7.48	0.01	1.07	0.22	4.84		921	74	423	2.5	62	16	10.8	2.69		186	0.277	15.1	0.563	0.116	8.9	0.675	1.599	0.228	1.149	0.452	0.126	0.711	0.157	1.309	0.351	1.243	0.182	1.235	0.188
Isua-depleted	242729	48.15	0.2	13.86	11.38	0.24	14.75	10.5	0.07	0.64	0.21	3.21		1760	76	645	1.5	26	7	10	5.11		162	0.285	12.9	0.483	0.101	6	0.37	0.915	0.128	0.606	0.228	0.081	0.345	0.087	0.821	0.234	0.944	0.153	1.094	0.184
Isua-depleted	242717A	48.6	0.17	15.87	10.38	0.2	13.49	10.23	0.05	0.82	0.19	3.9		757	58	343	1.4	62	8	9	2.93		169	0.162	13.7	0.478	0.076	8.8	0.48	1.216	0.19	1.018	0.411	0.126	0.676	0.149	1.277	0.344	1.255	0.182	1.253	0.186
Isua-depleted	462903	51.21	0.33	20.17	10.96	0.14	8.47	5.81	1.93	0.96	0.02	3.34		85	50	101	44.4	89	147	13.4		34	195	0.624	24.8	0.826	0.265	10.7	1.385	3.411	0.479	2.272	0.727	0.215	1.036	0.196	1.619	0.416	1.463	0.214	1.441	0.222
Isua-depleted	462906	52.34	0.22	19.01	8.18	0.13	11.4	7.49	1.18	0.04	0.01	4.69		161	44	158	3.1	51	10	12.6		38	171	0.337	12.1	0.464	0.07	7.3	0.589	1.329	0.2	0.964	0.38	0.157	0.581	0.123	1.043	0.283	1.046	0.161	1.142	0.188
Isua-depleted	462944	50.93	0.3	16.64	11.5	0.18	12.61	5.86	1.91	0.06	0.01	4.14		519	62	214	3.1	58	9	13.5		39	189	0.54	21.4	0.738	0.289	9.6	1.259	2.964	0.396	1.842	0.621	0.18	0.95	0.19	1.507	0.376	1.323	0.196	1.369	0.212
Isua-depleted	462947	50.97	0.36	18.47	10.71	0.15	8.42	7.58	3.18	0.12	0.02	2.48		189	43	96	3.1	118	16	15.4		42	198		22.2	0.759	0.178	11.2	1.027	2.664	0.398	1.988	0.714	0.237	1.131	0.226	1.773	0.44	1.546	0.228	1.6	0.253
Isua-depleted	462966	46.78	0.22	16.58	11.94	0.23	16.06	7.07	0.95	0.16	0.01	5.31		1259	72	517	7.4	33	20	12.6		29	171		12.2	0.499	0.082	8.3	0.674	1.394	0.211	1.017	0.395	0.177	0.659	0.149	1.238	0.328	1.185	0.17	1.189	0.191
Isua-depleted	242790A	50.09	0.32	17.77	11.4	0.17	9.82	8.18	0.02	2.02	0.21	0.92		219	69	113	0.72	67	12.1	15	6.35		219	0.45	20.5	0.515	0.141	12.6	0.969	2.533	0.382	1.746	0.693	0.214	0.985	0.199	1.576	0.399	1.246	0.218	1.327	0.231
Isua-depleted	810381	49.22	0.27	17.95	10.54	0.13	12.92	7.66	0.15	0.97	0.18	1.16		258	69	212	10.13	49	8.5	13	86.6		209	0.439	14.7	0.435	0.142	11.2	0.859	1.841	0.237	1.163	0.552	0.163	0.743	0.158	1.363	0.369	1.2	0.205	1.383	0.229
Isua-depleted	242725	46.73	0.22	15.12	11.85	0.24	15.41	9.07	0.16	0.99	0.23	3.83		1395	81	609	4.53	38	30.1	11	1.8		191	0.15	11.3	0.426	0.046	6.8	0.339	0.957	0.153	0.807	0.356	0.095	0.585	0.127	1.061	0.276	0.955	0.141	0.94	0.138
Isua-depleted	462902	48.23	0.23	17.48	9.14	0.21	10.74	12.6	1.16	0.2	0.01	1.76		963	50	297	9.16	94	12.8	12.2		49	177	0.327	14.4	0.542	0.098	10.4	0.674	1.635	0.231	1.11	0.46	0.185	0.754	0.167	1.45	0.397	1.482	0.224	1.575	0.244
Isua-depleted	810381a	48.61	0.27	17.73	10.41	0.13	12.76	7.57	0.96	0.15	0.18	1.15		255	68	210	10.01	48.4	8.4	12.9	85.6		207	0.43	14.5	0.43	0.14	11.1	0.85	1.82	0.23	1.15	0.55	0.16	0.73	0.16	1.35	0.37	1.19	0.2	1.37	0.23	0.923	0.046	0.0718	0.53	0.05	52.1	64.8
Isua-depleted	242790A	49.6	0.32	17.6	11.29	0.17	9.72	8.1	2	0.02	0.21	0.91		217	67.9	112	0.71	65.9	12	14.6	6.29		217	0.45	20.3	0.51	0.14	12.5	0.96	2.51	0.38	1.73	0.69	0.21	0.98	0.2	1.56	0.4	1.24	0.22	1.32	0.23	0.09	0.03	0.0468			1.1	81.8
Isua-depleted	242670	49.5	0.31	18.52	10.72	0.23	8.8	9.32	1.23	0.08	0.21	1.01		254	62.7	177	4.87	74.3	11	15.1	3.36		209	0.79	25.7	0.67	0.43	13.3	2.08	4.53	0.59	2.62	0.82	0.29	1.07	0.22	1.54	0.43	1.29	0.25	1.65	0.27	0.827	0.11	0.0647		0.07	2.6	77.7
Isua-depleted	242744	50.03	0.39	17.82	11.54	0.17	8.05	7.37	1.8	0.15	0.2	2.42		55.6	45.4	59.1	3.28	84.1	22	14.1	1.22		233	0.55	23.4	0.75	0.18	15.6	1.25	3.21	0.47	2.31	0.86	0.21	1.15	0.22	2.06	0.49	1.53	0.27	1.91	0.27	0.163	0.014	0.048	0.12	0.01	4.3	78
Isua-depleted	242743	46.72	0.21	16.34	9.69	0.14	14.83	6.28	0.66	0.02	0.19	4.85		701	63.4	342	1.08	52.2	5	11	0.53		185	0.23	12.5	0.35	0.022	10.2	0.59	1.22	0.2	0.95	0.37	0.16	0.59	0.15	1.16	0.32	1	0.16	1.29	0.23	0.096		0.0179			2.5	62.2
Isua-depleted	242742	47.1	0.21	19.56	8.71	0.13	10.88	8.07	1.68	0.1	0.2	3.29		359	44.8	149	1.24	72.8	10	12.3	1.05		198	0.39	15.3	0.46	0.17	9.54	1.02	2.47	0.31	1.35	0.54	0.17	0.64	0.17	1.27	0.27	0.99	0.18	1.14	0.19	0.108	0.011	0.0318		0	2.7	52.1
Isua-depleted	242733	48.62	0.36	17.37	10.92	0.15	9.31	8.6	1.65	0.1	0.22	2.64		106	53.7	122	0.97	56.8	4.8	14.4	1		230	0.39	19.3	0.54	0.043	13.3	0.57	1.88	0.33	1.91	0.64	0.22	1.05	0.22	1.56	0.41	1.28	0.23	1.36	0.22	0.094	0.008	0.0315		0	47.2	49.5
Isua-depleted	242737	45.14	0.2	15.99	9.8	0.15	16.37	5.84	1.13	0.04	0.18	5.1		1207	65.8	472	1.51	54.7	3.4	10	0.63		160	0.21	10.4	0.33		7.42	0.13	0.38	0.09	0.45	0.26	0.1	0.48	0.09	0.81	0.23	0.83	0.14	0.92	0.16	0.116	0.003	0.0236		0	11.9	59.3
Isua-depleted	242729	46.62	0.19	13.42	11.02	0.23	14.28	10.17	0.62	0.07	0.2	3.11		1705	73.8	625	1.49	25.3	6.8	9.84	4.95		157	0.28	13.1	0.43	0.067	7.38	0.4	0.89	0.14	0.55	0.19	0.08	0.4	0.08	0.75	0.22	0.78	0.13	1.08	0.18	0.14	0.043	0.0247	0.19	0.02	23.8	101
Isua-depleted	242725	44.88	0.21	14.52	11.38	0.23	14.8	8.71	0.95	0.15	0.22	3.69		1343	77.7	586	4.36	36.5	29	10.9	1.73		184	0.14	9.82	0.3	0.022	7.93	0.32	0.96	0.18	0.83	0.38	0.11	0.59	0.11	0.98	0.28	0.83	0.17	0.98	0.14	0.166	0.002	0.0147	0.13	0.02	0.8	84.1
Isua-depleted	242719c	46.5	0.23	16.83	9.12	0.2	11.31	11.68	1.18	0.04	0.23	2.32		908	61.3	366	1.15	115	9.8	11.1	3.92		183	0.25	12.9	0.37	0.052	10.1	0.37	1.03	0.2	1.07	0.41	0.15	0.74	0.14	1.2	0.31	0.97	0.15	1.2	0.21			0.0241	0.19	0.03	18.5	60.6
Isua-depleted	242718	47.22	0.22	16.08	9.97	0.16	13.25	7.13	1.02	0.06	0.21	4.62		878	70.3	403	2.38	58.8	15	10.8	2.57		177	0.26	12.8	0.4	0.063	10	0.61	1.64	0.23	1.24	0.43	0.15	0.7	0.15	1.25	0.33	1.08	0.16	1.28	0.18	0.108		0.0314	0.1	0.03	18	66.4
Isua-depleted	242717A	46.29	0.16	15.11	9.89	0.19	12.85	9.74	0.78	0.05	0.18	3.75		728	56	330	1.37	60	7.5	9.43	2.82		163	0.16	10.4	0.32	0.053	9.1	0.51	1.09	0.21	0.82	0.36	0.12	0.61	0.14	1.1	0.26	0.83	0.18	1.11	0.18	0.157	0.022	0.0175		0.02	14.9	56.7
Isua-depleted	242689	48.74	0.3	17.83	11.03	0.22	9.37	9.33	1.88	0.1	0.19	0.95		363	65.9	174	6.78	52.5	1.5	14.6	3.86		238	0.4	21.2	0.65	0.23	12.9	1.13	3.32	0.43	1.96	0.69	0.27	1.13	0.21	1.66	0.4	1.21	0.19	1.58	0.26	0.749	0.12	0.0487	0.24	0.52	24.6	84.3
Isua-depleted	242673b	49.31	0.22	16.19	11.08	0.19	17.15	2.78	0.5	0.11	0.15	2.24		1165	73.7	469	16.29	8.45	4.1	12.1	1.79		184	0.22	12.5	0.4	0.016	11	0.33	1.09	0.19	1.17	0.51	0.16	0.83	0.15	1.37	0.32	1.13	0.17	1.33	0.22			0.0208	0.36	0.13	83.9	74.9
Isua-depleted	242671b	49.47	0.29	18.2	11.13	0.19	9.58	9.02	1.43	0.02	0.18	0.4		271	62.3	160	1.5	53.8	3.7	14	2.67		211	0.64	24	0.68	0.26	13.6	1.9	4.24	0.56	2.75	0.86	0.29	1.16	0.23	1.68	0.45	1.36	0.23	1.54	0.26	0.299	0.058	0.0602		0.02	1.8	65.7
Isua-depleted	462904	48.62	0.2	14.09	10.68	0.24	12.46	12.82	0.76	0.11	0.01	1.7		1922	68	560	1.9	40	6	11		37		0.24	16.5	0.54	0.14	9	1.03	2.48	0.35	1.66	0.62	0.2	0.88	0.18	1.36	0.35	1.3		1.45	0.22
Isua-depleted	462945	50.4	0.33	18.09	11.26	0.2	9.1	8.66	1.84	0.11	0.02	2.62		209	53	102	1.6	74	10	14		45		0.33	21.6	0.8	0.17	9.4	0.67	1.83	0.28	1.38	0.55	0.23	0.86	0.18	1.44	0.36	1.27		1.34	0.22
Isua-depleted	462946	51.57	0.36	18.34	10.62	0.17	8.46	7.11	3.24	0.1	0.02	1.72		204	49	96	1.2	118	17	15		39		0.58	23.4	0.92	0.2	10.8	1.04	2.54	0.37	1.86	0.69	0.22	1.06	0.21	1.72	0.46	1.68		1.65	0.25
Isua-depleted	K20																25.74	84.92	21.67		2.89			0.91	3.55	0.19	0.26	10.97	1.41	4.16	0.51	2.51	0.74	0.25	1.08	0.22	1.79	0.44	1.45	0.24	1.65	0.18		0.05	0.27
Isua-depleted	K23																5.71	45.59	12.51		0.84			0.17	1.61	0.11	0.07	8.44	0.47	1.28	0.2	1.09	0.37	0.11	0.63	0.15	1.3	0.34	1.14	0.19	1.35	0.15		0.01	0.05
Isua-depleted	K562																7.69	69.94	19.53		2.54			0.36	1.53	0.1	0.1	11.47	0.79	1.96	0.3	1.55	0.51	0.2	0.87	0.2	1.7	0.44	1.52	0.26	1.84	0.2		0.03	0.14
Isua-depleted	K566																0.51	49.83	7.36		1.61			0.26	1.55	0.09	0.07	7.35	0.48	1.19	0.19	1.04	0.34	0.18	0.59	0.13	1.11	0.29	0.97	0.16	1.16	0.13		0.01	0.07
Isua-depleted	K585																0.45	58.57	8.62		2.15			0.29	1.98	0.1	0.09	11.55	0.77	1.79	0.28	1.47	0.49	0.18	0.88	0.2	1.73	0.44	1.5	0.25	1.83	0.2		0.02	0.12
Isua-depleted	K626																0.75	104.97	19.01		4.56			0.23	1.71	0.11	0.04	14.26	0.51	1.08	0.21	1.18	0.47	0.21	0.95	0.23	2.09	0.55	1.93	0.33	2.45	0.26		0.01	0.07
Isua-depleted	K646																0.41	59.92	10.03		3.22			0.41	4.84	0.2	0.27	8.82	1.15	2.54	0.39	1.86	0.56	0.21	0.88	0.18	1.45	0.36	1.15	0.19	1.29	0.15		0.05	0.07
Isua-depleted	K694																3.19	75.23	14.23		2.19			0.27	1.7	0.12	0.08	11.02	0.7	1.47	0.25	1.32	0.44	0.17	0.79	0.18	1.62	0.43	1.46	0.24	1.74	0.19		0.02	0.11
Isua-depleted	K730																5.01	51.39	31.91		3.92			0.19	1.69	0.12	0.05	10.05	0.58	1.17	0.22	1.27	0.46	0.19	0.79	0.18	1.54	0.4	1.32	0.22	1.52	0.17		0.01	0.11
Isua-depleted	K736																5.91	64.73	37.6		2.7			0.39	3.44	0.16	0.09	11.7	0.76	1.62	0.28	1.54	0.56	0.24	0.96	0.21	1.79	0.46	1.52	0.25	1.74	0.19		0.02	0.11
Median	median	49.425	0.27	17.77	10.715	0.175	10.715	8.35	1.17	0.115	0.18	2.62		264.5	62.15	175	3.1	63.365	11	13.45	2.8	39	198	0.375	16.5	0.5335	0.14	10.4	0.76	1.841	0.28	1.414	0.55	0.197	0.86	0.18	1.45	0.396	1.294	0.211	1.395	0.22	0.1485	0.02	0.04935	0.19	0.02	13.4	66.05
		SiO2	TiO2	Al2O3	Fe2O3	MnO	MgO	CaO	Na2O	K2O	P2O5	LOI		Cr	Co	Ni	Rb	Sr	Ba	Ga	Pb	Sc	V	Nb	Zr	Hf	Th	Y	La	Ce	Pr	Nd	Sm	Eu	Gd	Tb	Dy	Ho	Er	Tm	Yb	Lu	Cs	U	Ta			Cu	Zn
Isua-undifferentiated	36617	51.1	0.6	7.96	13.04	0.2	15.18	10.09	0.01	1.78	0.06	1.09		1587	76	552		113	4.1		1.12		140	1.31	48.3		0.62	10.9	3.14	7.8	1.12	5.7	1.85	0.58	2.21	0.37	2.19	0.47	1.13	0.17	1.16	0.18		0.12	0.11
Isua-undifferentiated	36647	51	0.59	8.09	13	0.19	15.14	10.1	0.01	1.8	0.07	1.1		1560	75	570		129	4.6		1.04		136	1.28	49.9		0.68	10.8	3.07	8.18	1.13	5.6	1.73	0.58	2.12	0.34	2.08	0.46	1.14	0.17	1.13	0.15		0.11	0.11
Isua-undifferentiated	36678	51.7	0.78	10.28	13.63	0.25	9.36	11.4	0.15	2.37	0.07	2.11		594	57	127	0.6	56	9.1		1.26		210	1.54	49		0.4	16.6	2.96	7.73	1.17	5.85	1.84	0.64	2.81	0.46	2.91	0.63	1.58	0.25	1.67	0.24			0.13
Isua-undifferentiated	36708	48.02	0.52	7.85	13.61	0.21	21.04	8.33	0.01	0.34	0.08	4.47		2268	95	826	1	14	5.3		0		139	1.21	45.6		0.61	11.8	2.89	6.71	0.92	4.46	1.56	0.44	2.06	0.31	2.05	0.45	1.13	0.16	1.17	0.17		0.1	0.11
Isua-undifferentiated	36739	51.94	0.58	8.67	12.24	0.19	14.5	9.56	0.01	2.24	0.07	1.08		1581	74	474		133	4.7		1.55		140	1.36	55.8		0.79	11	4.15	9.79	1.34	6.38	1.57	0.58	1.97	0.29	1.88	0.44	1.08	0.18	1.14	0.15		0.14	0.12
Isua-undifferentiated	36770	51.62	0.62	8.31	12.98	0.19	14.78	8.61	0.54	2.26	0.08	1.2		1366	78	456	21.2	102	50.4		1.42		151	1.41	57.5		0.66	12.9	4.51	9.89	1.44	6.42	2.11	0.65	2.41	0.39	2.55	0.48	1.28	0.19	1.23	0.19		0.12	0.12
Isua-undifferentiated	36800	51.2	0.62	8.38	12.84	0.19	14.42	10.03	0.07	2.19	0.06	0.98		1621	80	516	1.9	131	8.2		1.3		149	1.4	55.6		0.63	12.1	3.84	9.24	1.35	6.53	1.79	0.55	2.09	0.31	2.23	0.47	1.2	0.17	1.24	0.15		0.1	0.12
Isua-undifferentiated	36831	51.18	0.63	8	13.43	0.19	14.81	9.45	0.39	1.85	0.07	1.15		1383	81	493	17.9	92	52.7		0.99		150	1.44	51.3		0.6	11.8	2.39	6.3	0.91	5.07	1.56	0.54	2.02	0.33	2.37	0.43	1.2	0.17	1.09	0.17		0.11	0.12
Isua-undifferentiated	36861	51.48	0.6	8.88	12.44	0.19	14.62	9.49	0.01	2.22	0.08	1.14		1634	77	483	0.6	126	5.2		1.69		147	1.35	57.4		0.82	11.8	4.36	10.4	1.46	6.35	1.81	0.6	2.2	0.31	2.06	0.43	1.1	0.17	1.21	0.16		0.81	0.12
Isua-undifferentiated	2000-13	50.72	0.64	8.3	13.41	0.22	13.98	11.01	0.07	1.57	0.08	1.19		1414	73	465	2	91	10.5		1.62		170	1.21	46.6		0.63	14	3.38	8.82	1.34	6.31	2.04	0.65	2.79	0.4	2.48	0.53	1.3	0.21	1.23	0.2		0.14	0.1
Isua-undifferentiated	2000-14	48.76	0.67	8.89	14.61	0.23	13.98	11.39	0.12	1.27	0.07	1.36		1559	82	554	3.5	38	10.5		1.02		174	1.33	50.9		0.63	15.9	4.18	10.49	1.48	7.45	2.51	0.76	3.12	0.44	3	0.59	1.54	0.22	1.48	0.24		0.11	0.12
Isua-undifferentiated	2000-19	50.95	0.59	7.99	13.11	0.17	15.28	10.05	0.05	1.72	0.07	1.03		1648	81	597	0.8	102	3.5		0		147	1.37	53.7		0.69	12.3	4.7	10.69	1.38	7.29	2.1	0.64	2.4	0.37	2.33	0.48	1.22	0.18	1.12	0.18		0.11	0.12
Isua-undifferentiated	2000-27	53.35	1.14	14.14	14.96	0.22	4.45	7.93	0.21	3.49	0.12	0.29		33	41	31	1.9	98	15.8		5.08		275	2.75	77.1		0.63	27.6	6.26	15.37	2.32	12.41	3.65	1.16	4.28	0.71	4.36	1.01	2.65	0.41	2.74	0.46		0.1	0.22
Isua-undifferentiated	465401	53.11	0.87	10.74	14	0.42	8.86	8.92	2.87	0.13	0.06	1.29		565	61	121	0.6	44	10.1		6.92		256	2.04	65.3		0.78	20	3.58	10.02	1.45	7.13	2.45	0.9	3.24	0.51	3.34	0.72	2.02	0.3	1.96	0.3		0.12	0.19
Isua-undifferentiated	465415	44.82	0.87	11.72	17.67	0.22	11.36	11.23	0.97	1.09	0.05	2.16		715	65	222	40.6	12	61.5		1.88		251	2.16	57		0.61	18.8	3.56	9.89	1.51	7.73	2.14	0.62	3.32	0.47	2.89	0.65	1.85	0.27	1.92	0.26		0.09	0.18
Isua-undifferentiated	465417	49.61	1.05	11.9	14.94	0.19	9.99	9.34	1.43	1.51	0.05	1.24		194	59	88	62.8	78	75.1		1.44		248	2.26	70.6		0.45	21.7	3.52	10.53	1.66	9.01	3.26	1.11	4.12	0.62	3.96	0.81	2.08	0.32	1.97	0.3		0.11	0.18
Isua-undifferentiated	465418	49.28	0.88	10.06	15.33	0.22	10.91	11.39	0.77	1.13	0.04	1.54		864	63	189	40.5	32	45.4		0.93		252	1.83	55.6		0.35	17.7	2.67	8.56	1.45	7.43	2.61	0.85	3.18	0.52	3.08	0.66	1.87	0.27	1.64	0.25		0.09	0.15
Isua-undifferentiated	465424	52.17	0.9	10.93	11.98	0.16	11.7	9.52	1.95	0.63	0.04	1.38		893	51	140	21	92	52.8		2.21		291	1.88	56.2		0.4	17.3	3.04	8.67	1.38	7.15	2.55	0.88	2.95	0.49	3.22	0.65	1.83	0.24	1.73	0.22		0.1	0.16
Isua-undifferentiated	465426	48.27	0.8	9.86	14.77	0.25	13.49	11.1	1.25	0.17	0.04	2.48		1030	61	254	3.1	46	8		1.74		305	2.46	55.3		1.48	21.5	3.3	8.92	1.42	7.89	2.78	0.94	3.59	0.63	4.09	0.79	2.19	0.31	2.01	0.14		0.1	0.17
Isua-undifferentiated	465427	49.38	0.71	8.24	13.65	0.2	18.09	8.98	0.66	0.06	0.03	2.82		2200	84	632	0.5	7	2.1		0.55		204	1.6	43.8		0.36	13.2	3.03	8.62	1.32	6.47	2.28	0.74	2.54	0.4	2.37	0.53	1.44	0.18	1.31	0.2		0.08	0.13
Isua-undifferentiated	465428	48.24	0.68	7.93	14.05	0.19	19.52	8.93	0.39	0.04	0.03	4.56		2916	91	896	0.3	11	1.2		0.77		190	1.46	41.9		0.41	13.1	3.95	9.82	1.41	7.42	2.38	0.63	2.41	0.38	2.33	0.48	1.31	0.18	1.36	0.18		0.07	0.12
Isua-undifferentiated	465429	47.93	0.72	8.24	13.77	0.19	19.25	9.38	0.43	0.04	0.03	4.61		2468	85	746	0.4	18	5		0.95		234	2.25	49.2		2.12	16.7	2.76	7.54	1.19	6.33	2.22	0.64	2.91	0.47	3.14	0.62	1.65	0.23	1.56	0.1		0.07	0.16
Isua-undifferentiated	465431	50.18	0.5	6.46	12.87	0.19	19.57	9.76	0.39	0.04	0.03	2.42		2051	100	952	0.7	12	1.2		1.38		148	1.49	33.8		0.25	12.3	1.8	5.33	0.84	4.64	1.61	0.44	1.97	0.32	2.08	0.4	1.1	0.15	1.04	0.07		0.06	0.1
Isua-undifferentiated	JG03/41	54.1	0.99	14.6	11.4	0.19	5	7	5.18	0.25	0.1			80		69.8	3.79	229	52.9			28		3.73	90.4	2.39	1.28	21.7	7.79	19.7	2.82	13	3.53	1.13	4.11	0.7	4.19	0.85	2.45		2.29	0.34		0.3	0.25
Isua-undifferentiated	JG03/43	53.1	1.01	14.5	12.3	0.17	5.2	6.5	4.27	1.15	0.1			63		60	40.05	178	219			28		3.83	94.5	2.48	1.33	23.7	8.72	21.3	3.01	13.8	3.69	1.13	4.3	0.75	4.43	0.92	2.65		2.46	0.36		0.32	0.26
Isua-undifferentiated	JG03/45	52.7	0.97	14.5	11.5	0.21	5.3	8	4.67	0.13	0.1			83		70.7	0.53	265	11.5			27.7		3.54	87.3	2.33	1.22	21.2	8.29	19.9	2.79	12.9	3.39	1.09	3.97	0.68	3.96	0.81	2.36		2.26	0.32		0.26	0.24
Isua-undifferentiated	JG03/46	50.8	0.78	9.2	13.6	0.22	12	10.6	1.61	0.16	0.05			974		257	1.43	101	41			33.8		2.35	65.2	1.76	0.95	16.3	4.74	12.5	1.85	9.03	2.7	0.89	3.25	0.57	3.23	0.64	1.83		1.58	0.23		0.19	0.17
Isua-undifferentiated	JG03/48	51.7	0.76	9.3	13	0.22	11.4	10.6	1.77	0.16	0.05			960		250	1.52	122	45.3			33.1		2.33	63.7	1.72	0.92	15.9	4.29	11.6	1.75	8.52	2.6	0.88	3.2	0.55	3.19	0.64	1.77		1.55	0.23		0.19	0.16
Isua-undifferentiated	JG03/49	51.2	0.75	9.3	12.9	0.22	11.4	10.7	1.81	0.16	0.05			987		258	1.49	127	41.8			32.8		2.27	62.4	1.69	0.89	15.8	4.64	12.1	1.8	8.82	2.6	0.88	3.17	0.55	3.14	0.63	1.7		1.58	0.22		0.19	0.17
Isua-undifferentiated	JG03/50	52.6	0.77	9.5	12.2	0.21	10.9	10.8	2.14	0.16	0.05			975		244	1.13	173	49.5			33.3		2.42	64.5	1.78	0.94	15.8	4.64	12.2	1.81	8.76	2.63	0.83	3.15	0.56	3.23	0.63	1.77		1.57	0.22		0.2	0.17
Isua-undifferentiated	JG03/52	51.1	0.78	9.4	13.3	0.22	11.5	10.4	1.84	0.21	0.05			994		256	2.77	138	66.2			34.1		2.31	65.3	1.79	0.94	16.9	5.04	13	1.93	9.46	2.84	0.95	3.41	0.59	3.37	0.68	1.86		1.66	0.24		0.22	0.17
Isua-undifferentiated	JG03/53	51.3	0.74	9.5	13.2	0.22	11.4	10.6	1.9	0.22	0.05			921		244	2.83	161	76.1			33.3		2.22	62.5	1.63	0.87	16.4	5.74	14.2	2.03	9.73	2.77	0.96	3.26	0.56	3.21	0.62	1.73		1.55	0.22		0.21	0.16
Isua-undifferentiated	JG03/54	51.3	0.76	9	12.3	0.22	10.8	11.2	1.71	0.16	0.05			915		228	1.32	140	43.5			33		2.42	63.8	1.69	0.9	15.9	4.7	12	1.77	8.61	2.56	1.02	3.07	0.54	3.1	0.61	1.72		1.54	0.22		0.19	0.16
Isua-undifferentiated	JG03/55	52.8	0.77	9.3	12.6	0.21	11.2	10.5	1.68	0.16	0.05			929		240	1.05	135	41.3			33.6		2.28	64.9	1.72	0.9	15.7	4.65	11.5	1.73	8.37	2.54	0.8	3.09	0.54	3.07	0.61	1.7		1.5	0.21		0.19	0.17
Isua-undifferentiated	JG03/57	53.1	0.89	11.1	12.4	0.25	8.3	8.9	3.43	0.16	0.06			276		99.2	1.18	193	37			36.4		2.46	69.4	1.88	0.83	18.6	4.71	12.2	1.85	9.31	2.9	0.88	3.58	0.63	3.63	0.73	2.04		1.83	0.27		0.18	0.17
Isua-undifferentiated	JG03/60	59	0.8	11.3	9	0.15	4.9	9.1	3.5	0.15	0.05			231		73.7	0.96	222	34.8			32.4		2.27	62.5	1.68	0.74	18.5	6.39	15.2	2.18	10.6	2.94	1.2	3.66	0.61	3.57	0.7	1.98		1.72	0.25		0.18	0.16
Isua-undifferentiated	JG03/62	47.7	0.97	9.7	16.3	0.29	10.5	9.8	2.07	0.18	0.06			316		273	0.76	70.1	10.4			39.2		2.49	75.2	2.01	0.87	19.3	4.02	11.1	1.73	8.84	2.8	1.03	3.58	0.63	3.72	0.75	2.13		1.91	0.27		0.18	0.18
Isua-undifferentiated	JG03/64	52.5	0.74	9.3	12	0.21	12.1	9.9	1.59	0.21	0.05			1094		326	2.58	154	53.3			29.8		2.39	64.8	1.73	0.97	15.6	6.13	15	2.14	10.1	2.73	0.87	3.18	0.53	3.06	0.61	1.7		1.52	0.22		0.21	0.17
Isua-undifferentiated	2000-14	48.76	0.67	8.89	14.61	0.23	13.9g	11.39	1.27	0.12	0.07	1.36		1559	82	554	35	38	10.5					1.33	50.9		0.63	15.9	4.18	10.5	1.48	7.45	2.51	0.76	3.12	0.44	3	0.59		1.54	1.48	0.24		0.11	0.12
Isua-undifferentiated	2000-10	51.2	0.62	8.38	12.84	0.19	14.42	10.03	2.19	0.07	0.06	0.98		1621	80	516	1.9	131	8.2					1.4	55.6		0.63	12.1	3.84	9.24	1.35	6.53	1.79	0.55	2.09	0.31	2.23	0.47		1.2	1.24	0.15		0.1	0.12
Isua-undifferentiated	G05/32	55.53	0.81	14.26	11.77	0.22	5.18	7.4	4.07	0.25	0.02	0.29		73.2	44.6	72.5	3.16	106	24.7			28		2.73	69.2	1.98	0.85	18.6	6.01	14.1	1.95	9.26	2.62	0.81	3.13	0.57	3.4	0.69		2.03	1.81	0.27		0.17	0.18
Isua-undifferentiated	JEH-2007–23	52	0.74	13.6	10.7	0.16	10.2	8.9	1.7	0.14	0.047	1.59		527	40	82		75	5.1	15.1	4.09	36.5	188	2.09	54.6	1.65	0.63	17	3.78	9.7	1.46	2.26	7.17	0.76	2.87	0.505	3.34	0.697	1.95	0.295	1.94	0.289	0.424	0.156	0.151			101	83
Isua-undifferentiated	JEH-2007–12	48.4	0.87	14.6	13.2	0.21	7.25	10.8	1.94	0.12	0.05	1.1		210	45.9	108		75.4	21.3	15.3	4.28	40.5	248	1.95	49.1	1.43	0.245	18.2	2.77	7.55	1.21	6.3	2.13	0.781	2.84	0.513	3.46	0.735	2.07	0.314	2.1	0.316	0.0409	0.0646	0.133			103	82.5
Isua-undifferentiated	JEH-2007–08	45.9	1.04	12.8	17.5	0.27	9.36	9.83	1.42	0.24	0.058	1.62		323	48.4	87		35.5	17.2	17.3	3.57	35.1	237	3.31	77	2.23	1.12	21.1	5	13.9	2.19	10.7	3.31	1.04	3.99	0.69	4.49	0.91	2.4	0.35	2.22	0.327	0.815	0.249	0.254			38.1	131
Isua-undifferentiated	JEH-2007–19	53.9	0.7	8.58	11.9	0.19	12.6	9.44	1.51	0.12	0.042	1.07		1036	52.3	273		162	44.8	11	5.55	27.5	151	2.01	58.6	1.68	0.849	14	4.93	13	1.89	8.93	2.52	0.821	2.86	0.465	2.88	0.572	1.52	0.219	1.4	0.205	0.0953	0.188	0.155			96.1	71.9
Isua-undifferentiated	JEH-2007–20	51.4	0.77	9.32	12.4	0.21	12.6	10.5	1.45	0.13	0.038	0.97		1141	55.6	319		131	21.9	12	5.53	30.4	154	2.13	62.9	1.86	0.96	15.3	6.55	16	2.28	10.6	2.93	0.967	3.29	0.528	3.24	0.645	1.71	0.247	1.59	0.233	0.045	0.226	0.16			135	82
Isua-undifferentiated	JEH-2007–21	53.4	0.68	8.2	12.2	0.2	12.6	10.2	1.22	0.14	0.043	0.96		986	53	283		90	35.2	11	4	27.2	156	1.84	55.6	1.65	0.828	14	5.67	13.5	2.03	9.48	2.62	0.887	2.96	0.479	2.93	0.583	1.55	0.228	1.45	0.209	0.129	0.189	0.14			92	77
Isua-undifferentiated	G04/86	46.4	1.03	13.4	19.45	0.3	7.08	10.29	2.46	0.26	0.09			162		100	1.71	113	6.8					2.79	76.5	2.26	0.66	21	5.52	14.3	2.17	11	3.46	1.19	4.08	0.71	4.09	0.82	2.3		2.06	0.3		0.15	0.18
Isua-undifferentiated	G04/87	50.45	0.84	11.01	17.17	0.25	7.56	11.11	2.1	0.25	0.05			358		132	2.62	97.1	6.3					2.23	59	1.75	0.5	18.1	4.55	11.6	1.77	8.99	2.79	0.96	3.39	0.62	3.59	0.73	2.04		1.76	0.25		0.12	0.13
Isua-undifferentiated	G17/13	52.16	0.76	8.51	12.1	0.21	12.05	10.31	1.86	0.46	0.08			1266		452	11.9	181	110				137	3.6	78.7	2.3	1.43	13.8	11.8	26.9	3.61	15.9	3.36	0.86	3.08	0.45	2.73	0.52	1.42	0.2	1.15	0.18		0.3	0.23
Isua-undifferentiated	K1																2.78	93.36	30.82		3.72			2.64	6.19	0.32	0.35	17.24	2.92	9.5	1.22	6.47	2.05	0.67	2.79	0.5	3.4	0.72	2.08	0.3	1.98	0.22		0.07	0.36
Isua-undifferentiated	K48																1.48	131.16	55.92		6.26			1.93	4.34	0.29	0.22	19.48	2.61	7.94	1.17	6.42	2.14	0.8	2.98	0.54	3.79	0.81	2.35	0.35	2.25	0.26		0.05	0.29
Isua-undifferentiated	K70																0.84	82.5	20.77		2.25			2.34	21.34	0.77	0.27	19.87	2.84	8.29	1.23	6.71	2.23	0.76	3.07	0.56	3.9	0.84	2.43	0.36	2.35	0.28		0.05	0.3
Isua-undifferentiated	K155																3.76	58.6	16.13		12.94			1.33	9.16	0.41	0.49	14.7	2.54	6.71	0.92	4.47	1.3	0.47	1.95	0.37	2.75	0.62	1.84	0.27	1.76	0.21		0.08	0.24
Isua-undifferentiated	K179																11.9	56.31	98.45		4.06			7.43	14.94	0.7	1.55	38.2	9.91	23.98	3.49	17.57	5.1	1.63	6.63	1.12	7.45	1.56	4.5	0.65	4.24	0.48		0.3	0.6
Isua-undifferentiated	K409																20.42	151.52	73.39		17.31			7.01	10.78	0.51	1.35	36.9	9.32	21.9	3.28	16.42	4.75	1.9	6.12	1.03	6.85	1.43	4.09	0.58	3.69	0.41		0.28	0.49
Isua-undifferentiated	K428																3.27	76.98	62.73		7.88			1.44	4.78	0.27	0.4	19.49	3.41	8.57	1.32	7.01	2.25	0.77	3.08	0.56	3.81	0.81	2.33	0.34	2.19	0.24		0.06	0.15
Isua-undifferentiated	K457																3.25	68.75	48.2		2.78	0.24		2.14	4.5	0.24	0.03	2.69	7.31	1.2	6.56	2.19	0.76	3.07	0.56	3.92	0.83	2.39	0.35	2.25	0.25			19.72	0.28
Isua-undifferentiated	K464																0.6	163.67	75.58		9.36	0.17		1.7	3.89	0.21	0.04	2.54	6.98	1.17	6.58	2.24	0.81	3.15	0.58	4	0.85	2.47	0.36	2.34	0.26			19.04	0.27
Isua-undifferentiated	K508																0.95	52.02	24.59		3.95	0.44		2.87	3.59	0.31	0.06	3.8	10.31	1.66	8.96	2.83	1.21	3.81	0.68	4.61	0.97	2.79	0.41	2.64	0.29			23.47	0.25
Isua-undifferentiated	K672																1.6	112.65	43.22		14.97	0.35		3.46	7.72	0.28	0.05	3.38	8.95	1.46	7.92	2.6	0.9	3.55	0.64	4.38	0.93	2.67	0.39	2.55	0.29			22.05	0.45
Isua-undifferentiated	K695																3.84	85.75	29.09		2.9	0.24		2.29	10.57	0.24	0.08	2.83	7.84	1.27	6.9	2.3	0.8	3.15	0.57	3.93	0.84	2.43	0.36	2.37	0.28			20.32	0.61
Median	median	51.2	0.76	9.3	13.02	0.21	11.5	10.03	1.48	0.215	0.05	1.22		980.5	73.5	256.5	1.9	99.5	26.895	13.55	2.21	32.4	172	2.19	55.6	0.24	0.66	15.9	4.435	10.21	1.695	7.44	2.515	0.855	3.075	0.535	3.12	0.6475	1.73	0.27	1.575	0.23	0.11215	0.15	0.165			98.55	82.25
Nulliak-enriched	SG-002	50.25	1.01	14.48	11.88	0.22	7.79	11.56	2.3	0.42	0.07	1.04		137	51	93	3	176	67	18	3	39.6	289	3.7	23	0.8	0.77	16.2	4.7	11.52	1.66	7.62	2.18	0.809	2.55	0.46	2.95	0.63	1.72	0.244	1.56	0.229		0.18	0.29			22	91
Nulliak-enriched	SG-011	47.14	0.98	14.31	11.55	0.16	9.35	13.69	2.04	0.68	0.05	0.52		351	53	155	5	278	27	16	4	45.4	270	1.5	37	1.3	0.3	19.5	2.71	7.08	1.09	5.77	1.99	0.715	2.64	0.49	3.26	0.71	2.02	0.311	2.06	0.302		0.2	0.17			3	64
Nulliak-enriched	SG-028A	47.47	0.76	15.76	11.36	0.18	9.98	12.49	1.48	0.44	0.03	0.3		347
Nulliak-enriched	SG-029A	50.66	0.79	14.23	11.45	0.18	8.37	11.71	2.47	0.08	0.05	0		240	52	100	0	211	15	17		52	319	1.8	27	1.1		18.9	2.05	6.88	1.18	6.35	2.1	0.806	2.82	0.49	3.51	0.74	2.23	0.312	2.14	0.338		0	0.05			130	60
Nulliak-enriched	SG-029B	50.77	0.95	14.19	11.48	0.21	9.13	11.01	2.08	0.1	0.06	0
Nulliak-enriched	SG-029D	50.93	0.96	14.99	11.41	0.17	8.35	10.54	2.5	0.08	0.05	0
Nulliak-enriched	SG-035	50.02	0.95	16.2	10.03	0.2	6.74	12.65	2.92	0.22	0.07	0.25		150	39	70	0	209	37	18		47	288	2	44	1.3		20.7	2.97	9.31	1.48	7.44	2.59	0.829	3.17	0.57	3.76	0.81	2.36	0.339	2.17	0.357		0.02	0.09			20	70
Nulliak-enriched	SG-038A	49.38	1.32	14.81	12.72	0.21	7.91	10.43	2.72	0.4	0.08	0		210	51	110	2	227	79	18			318	2.1	56	1.6	0.1	24.1	3.49	9.81	1.57	7.66	2.56	0.941	3.32	0.62	4.02	0.82	2.44	0.362	2.39	0.392		0.05	0.14			20	120
Nulliak-enriched	SG-038B	49.05	1.06	16.12	11.91	0.18	7.24	11.19	2.89	0.24	0.07	0.11		208
Nulliak-enriched	SG-039	48.23	1.05	15.94	11.72	0.19	8.13	12.38	2.1	0.12	0.06	0.11		536	47	92	1	176	25	18	1	50.3	320	2.1	42	1.4	0.03	21.9	2.07	7.11	1.27	6.79	2.36	0.809	3.1	0.56	3.9	0.84	2.33	0.356	2.25	0.338		0.01	0.12			49	90
Nulliak-enriched	SG-041	50.38	0.82	15.87	10.38	0.17	7.6	11.83	2.82	0.07	0.05	0.23		110	48	73	0	248	22	16	1	50.6	297	1.8	32	1.1	0.05	17.7	2.07	6.8	1.12	5.73	1.91	0.648	2.34	0.45	3.03	0.65	1.9	0.285	1.89	0.29		0	0.11			17	68
Nulliak-enriched	SG-043	49.57	0.75	15.68	10.44	0.17	8.88	11.83	2.38	0.23	0.05	0.78		310	50	180	0	107	28	17		34	235	1.8	41	1.2		17.3	3.28	9.51	1.51	6.85	2.22	0.709	2.73	0.48	3.16	0.67	1.96	0.278	1.87	0.296		0.03	0.08			60	70
Nulliak-enriched	SG-044	47.78	1.1	16.06	13.12	0.23	8.34	11.23	1.67	0.37	0.09	0		200	53	110	3	220	70	19		47	339	2.4	52	1.6	0.28	25.7	4.5	12.9	2.04	9.76	3.07	0.986	3.84	0.73	5.06	1.07	3.11	0.453	3.01	0.471		0.03	0.1			0	100
Nulliak-enriched	SG-051	47.26	0.92	15.58	12.38	0.24	8.7	12.55	2.13	0.17	0.01			362	51	113	2	105	22	17	1	47.2	326	2.3	40	1.3	0.03	24.7	1.96	6.26	1.1	5.87	2.24	0.809	3.19	0.63	4.27	0.93	2.6	0.386	2.51	0.369		0.01	0.15			18	69
Nulliak-enriched	SG-053	48.07	1.18	15.05	13.17	0.25	8.35	11.94	1.65	0.24	0.08	0.57		290	54	140		114	43	18			340	1.6	38	1.3	0.06	24.5	3.22	9.35	1.49	7.95	2.6	0.983	3.42	0.67	4.27	0.9	2.51	0.387	2.53	0.392		0.03	0.09			130	90
Nulliak-enriched	SG-081	51.18	0.8	14.68	10.72	0.18	8.2	11.18	2.47	0.48	0.06	1.08		288	47	96	6	116	172	16	12	41.1	251	2.4	52	1.5	0.37	18	5.94	12.14	1.6	7.26	2.12	0.76	2.6	0.47	3.1	0.67	1.89	0.292	1.84	0.271		0.16	0.19			15	91
Nulliak-enriched	SG-082	50.01	1.09	15.19	11.37	0.2	7	11.54	2.74	0.75	0.08	1.41		234	47	114	11	112	146	17	12	45.6	300	3.1	45	1.5	0.19	24	4.64	11.88	1.8	8.71	2.65	0.881	3.42	0.62	4.03	0.88	2.52	0.381	2.49	0.36		0.08	0.21			69	104
Nulliak-enriched	SG-083	50.79	0.8	15.06	10.37	0.21	7.76	11.91	2.55	0.43	0.06	1.06		311	49	107	5	142	79	16	9	41.4	253	2.4	49	1.5	0.52	18.5	4.94	11.34	1.55	7.21	2	0.741	2.68	0.47	3.13	0.69	1.95	0.294	1.82	0.272		0.2	0.19			77	93
Nulliak-enriched	SG-088A	47.49	0.97	14.83	13.97	0.24	8.4	11.94	1.4	0.66	0.06	0.61		0
Nulliak-enriched	SG-090	49.73	0.62	16.19	9.29	0.19	8.51	13.43	1.58	0.38	0.07	1.61		550	41	130	5	75	66	16	12	45	248	1.5	27	0.8	0.07	13.8	2.96	7.45	1.11	5.14	1.58	0.575	2.08	0.38	2.57	0.54	1.62	0.236	1.48	0.231		0.08	0.07			10	140
Nulliak-enriched	SG-091	51.38	0.77	15.76	10.37	0.17	8.31	10.52	2.37	0.25	0.06	1.39		306	47	119	8	83	31	16	7	38.5	237	2.3	55	1.6	1.04	17.3	4.8	10.88	1.51	6.85	1.91	0.713	2.54	0.44	2.95	0.64	1.8	0.262	1.77	0.263		0.29	0.19			98	84
Nulliak-enriched	SG-092	52.3	0.8	14.47	10.5	0.18	7.89	11.06	2.24	0.5	0.05	1.44		310	44	90	6	123	82	16	9	43	280	2.4	51	1.3	0.97	17.3	5.57	12	1.59	7.31	2.03	0.691	2.63	0.47	3.03	0.64	1.85	0.278	1.84	0.284		0.31	0.18			50	90
Nulliak-enriched	SG-093	49.2	0.72	14.53	9.91	0.27	6.81	16.4	1.67	0.38	0.07	0.51		269	44	72	7	131	393	16	30	36.2	219	2	41	1.3	0.34	17.4	4.51	10.06	1.4	6.42	1.96	0.676	2.43	0.44	2.95	0.64	1.74	0.276	1.77	0.266		0.1	0.17			6	126
Nulliak-enriched	SG-095	53.42	0.77	14.01	10.42	0.17	8.52	9.62	2.16	0.83	0.07	2.4		260	43	80	26	103	215	16	5	41	264	2.3	56	1.5	0.49	15.6	5.24	11.4	1.6	7.34	1.99	0.737	2.6	0.45	2.99	0.63	1.81	0.27	1.71	0.279		0.2	0.16			20	90
Nulliak-enriched	SG-096	51.26	0.77	14.45	10.35	0.21	6.38	13.59	2.54	0.4	0.05	0.46		290	44	100	5	121	159	17	11	40	266	2.3	43	1.4	0.84	16.5	5.33	11.7	1.6	7.3	2.11	0.8	2.68	0.47	3.06	0.65	1.9	0.271	1.79	0.294		0.3	0.13			40	100
Nulliak-enriched	SG-097	51.4	0.78	14.22	10.9	0.19	7.85	11.42	2.52	0.65	0.06	0.97		290	45	90	12	120	124	16		43	277	2.1	45	1.3	0.12	17.2	4.79	11.3	1.63	7.38	2.02	0.729	2.75	0.48	3.15	0.68	2.01	0.298	1.87	0.298		0.09	0.11			20	90
Nulliak-enriched	SG-102	50.58	1	15.22	11.51	0.22	6.89	11.48	2.28	0.73	0.07	0.76		225	44	67	12	91	76	17	9	49.2	300	2.4	39	1.2	0.36	20.6	3.61	9.08	1.38	6.59	2.11	0.758	2.71	0.52	3.51	0.76	2.21	0.327	2.13	0.319		0.28	0.17			44	113
Nulliak-enriched	SG-104	48.27	0.55	15.18	10.65	0.19	11.42	11.6	1.63	0.41	0.03	1.43		430	61	210	5	85	49	13			214	1.2	22	0.7	0.23	12.1	2.24	5.51	0.81	4.14	1.29	0.546	1.89	0.36	2.39	0.49	1.36	0.205	1.4	0.227		0.1	0.12			140	80
Nulliak-enriched	SG-105	49.01	0.62	17.38	8.99	0.16	8.96	12.46	1.94	0.41	0.03	1.21		348
Nulliak-enriched	SG-106	47.98	0.62	14.4	11.3	0.21	11.68	11.77	1.44	0.48	0.03	1.35		693	65	227	9	94	41	14	9	42.2	212	1.2	30	0.9	0.21	14.4	2.21	5.61	0.86	4.33	1.45	0.553	1.91	0.36	2.42	0.52	1.51	0.221	1.45	0.211		0.11	0.09			40	98
Nulliak-enriched	SG-108	48.71	0.77	14.29	12.08	0.21	10.43	11.09	1.89	0.44	0.06	1.16		210
Nulliak-enriched	SG-109B	49.14	0.7	15.89	9.26	0.21	10.14	12.75	1.57	0.26	0.05	1.09		170	44	90	7	96	22	16	5		260	1.7	32	1.1		18.2	1.8	5.75	0.9	4.89	1.85	0.564	2.46	0.44	2.94	0.6	1.72	0.259	1.8	0.28		0.02	0.24			80	80
Nulliak-enriched	SG-111	48.11	0.56	14.77	11.62	0.21	10.73	11.66	1.84	0.38	0.03	0.76		533	65	368	4	136	48	14	3	30.9	166	1.3	28	0.9	0.27	10.9	2.19	5.69	0.89	4.58	1.45	0.571	1.8	0.31	1.99	0.41	1.16	0.167	1.09	0.158		0.07	0.11			1	97
Nulliak-enriched	SG-112	49.7	0.74	15.36	11.2	0.2	8.37	11.3	2.64	0.43	0.04	0.73		240	52	180	6	130	130	13	17		216	1.4	21	0.7	0.15	12.6	2.99	7.58	1.11	5.37	1.81	0.752	2.11	0.4	2.5	0.48	1.31	0.183	1.2	0.199		0.05	0.11			110	90
Nulliak-enriched	SG-113	49.39	0.54	16.15	8.94	0.21	8.12	14.64	1.69	0.3	0.03	0.53		46	44	159	2	167	80	14	4	40.2	200	1.1	22	0.7	0.02	11.1	1.81	5.01	0.82	4.32	1.45	0.54	1.78	0.31	2.02	0.43	1.19	0.178	1.09	0.16		0.01	0.11			6	71
Nulliak-enriched	SG-117	49.19	0.76	12.43	11.77	0.22	11.12	12.2	1.65	0.5	0.05	1.32		700	68	360	7	113	81	13			226	1.8	34	1	0.22	14.4	3.32	8.5	1.17	6	1.89	0.694	2.38	0.4	2.45	0.48	1.4	0.217	1.38	0.203		0.11	0.29			90	110
Nulliak-enriched	SG-139	49.98	0.89	14.67	11.82	0.24	6.94	11.86	2.62	0.92	0.06	0.92		200	53	50	19	142	192	15		48	308	2.5	61	1.3	0.35	19.8	5.69	13.2	1.85	8.27	2.3	0.904	2.95	0.54	3.57	0.73	2.17	0.311	2.05	0.337		0.08	0.16			40	140
Nulliak-enriched	SG-141	51.28	0.89	14.91	11.57	0.19	5.97	11.54	3.06	0.53	0.06	1.19		190	56	60	11	146	85	15	10	47	296	2.3	62	1.4	0.57	19.6	5.9	13.6	1.97	8.34	2.68	0.923	3.32	0.58	3.72	0.74	2.14	0.327	2.19	0.328		0.14	0.18			120	90
Nulliak-enriched	SG-230	50.08	1.22	14.87	12.65	0.23	6.33	10.88	2.77	0.88	0.09	0.45		110	44	70	14	88	77	18	6		319	3.1	85	2.2	1.08	27.7	7.22	17.1	2.38	11	3.16	1.01	3.76	0.75	4.74	0.93	2.83	0.417	2.72	0.422		0.33	0.19			60	120
Nulliak-enriched	SG-234	51.47	0.82	16.73	9.12	0.18	6.72	11.03	3.21	0.62	0.1	0.62		265	47	117	13	195	95	17	5	28.4	204	3.3	66	1.9	1.84	18.7	10.16	21.27	2.69	11.19	2.6	0.871	3.1	0.51	3.27	0.7	1.96	0.284	1.87	0.274		0.3	0.23			21	80
Nulliak-enriched	SG-281	49.69	0.98	13.71	13.02	0.19	8.88	11.13	2.24	0.11	0.06	0		167	55	75	0	169	17	17	1	60	360	2.2	25	1	0.04	22	2.39	9.33	1.76	9.48	3	0.763	3.34	0.6	3.9	0.84	2.35	0.34	2.22	0.323		0.01	0.11			71	82
Nulliak-enriched	SG-282	50.97	0.87	15.09	10.72	0.18	7.94	11.68	2.42	0.1	0.05	0		121	49	65	1	241	17	16	2	53.6	322	1.8	32	1.1	0.09	19.6	1.82	6.5	1.18	6.37	2.12	0.759	2.65	0.49	3.3	0.72	2.08	0.313	2.01	0.307		0.01	0.09			22	67
Nulliak-enriched	SG-283	50.47	0.89	14.31	10.77	0.15	7.99	12.44	2.79	0.08	0.11	0.1
Nulliak-enriched	SG-284	50.24	0.87	15.47	10.78	0.15	7.71	11.56	3.07	0.09	0.06	0.29
Median	median	49.855	0.82	15.02	11.33	0.195	8.255	11.67	2.29	0.4	0.06	0.62		262.5	49	100	5	130	70	16	6	44	277	2.1	41	1.3	0.27	18.2	3.32	9.35	1.49	6.85	2.11	0.758	2.68	0.48	3.15	0.68	1.96	0.292	1.87	0.294		0.08	0.14			40	90
Nulliak-Depleted	SG-031	48.22	0.4	20.88	6.86	0.11	9.17	12.82	1.17	0.23	0.04	0.34		553	47	223	2	136	43	15	4	21.5	133	0.9	19	0.6	0.19	7.4	2.8	6.44	0.86	3.7	0.99	0.444	1.13	0.2	1.32	0.28	0.79	0.117	0.76	0.114		0.05	0.11			25	138
Nulliak-Depleted	SG-033A	47.96	0.38	16.15	7.61	0.13	12.06	13.93	1.59	0.16	0.02	0.75		1090	47	220	1	91	11	13		41	193	0.8	17	0.6		7.2	1.85	5.52	0.78	3.65	1.09	0.429	1.18	0.21	1.35	0.29	0.82	0.124	0.79	0.118		0.01	0.02			20	70
Nulliak-Depleted	SG-033B	48.54	0.33	16.91	8.86	0.17	12.5	11.06	1.27	0.25	0.02	0.45		623					1300
Nulliak-Depleted	SG-034	47.51	0.39	14.9	8.89	0.19	13.04	13.76	0.99	0.33	0	1.13		1120	53	250	4	70	32	12		48	196	0.5	12	0.5		10.8	1.22	4.27	0.63	3.31	0.98	0.387	1.37	0.26	1.74	0.38	1.16	0.171	1.1	0.17						20	80
Nulliak-Depleted	SG-042	48.82	0.36	15.9	7.56	0.14	11.08	14.82	1.1	0.2	0.02	0.84		890	44	200	3	88	16	12		40	184	0.6	11	0.5		7.7	0.97	3.17	0.51	2.59	0.83	0.354	1.12	0.21	1.41	0.31	0.89	0.133	0.82	0.132						50	50
Nulliak-Depleted	SG-046	48.68	0.37	17.75	7.3	0.14	9.58	14.51	1.47	0.19	0.01	0.57		840	41	170	1	90	17	18		39	189	3.9	11	0.5		10.6	1.66	4.35	0.65	3.03	1.09	0.366	1.53	0.29	1.91	0.41	1.21	0.183	1.17	0.182		0.02	0.68			50	50
Nulliak-Depleted	SG-047	48.64	0.38	16.63	8.19	0.18	10.02	14.28	1.34	0.33	0.02	0.45		740	44	170	8	150	91	13		41	191	0.8	15	0.5		9.1	2.66	5.94	0.79	3.25	0.97	0.416	1.33	0.24	1.64	0.36	1.07	0.163	1.03	0.161		0.01	0.01			30	90
Nulliak-Depleted	SG-055	47.06	0.33	16.26	9.16	0.19	14.71	10.61	1.07	0.48	0.02	1.82		820	69	440	7	82	43	11			143	1.1	13	0.4	0.06	7.2	1.65	4.04	0.55	2.69	0.84	0.381	0.99	0.18	1.22	0.26	0.81	0.121	0.78	0.116		0.04	0.13			100	90
Nulliak-Depleted	SG-056	48	0.42	16.97	8.97	0.16	13.96	10.2	0.83	0.36	0.02	0.36		759	65	371	10	89	78	13	2	24.2	149	1.2	20	0.7	0.12	10.1	2.48	6.99	1.03	4.66	1.28	0.411	1.51	0.27	1.8	0.37	1.12	0.162	1.09	0.159		0.05	0.16			35	137
Nulliak-Depleted	SG-057	46.84	0.34	17.11	9.22	0.17	13.97	10.86	1.06	0.4	0.02	0.51		810	67	410	4	84	42	12		26	136	1	18	0.5	0.21	7.1	3.37	9.64	1.28	5.17	1.16	0.406	1.21	0.21	1.33	0.27	0.73	0.112	0.7	0.105		0.05	0.07			30	100
Nulliak-Depleted	SG-060	48.17	0.39	15.17	9.43	0.19	14.89	9.92	1.27	0.4	0.02	2.15		890	66	440	7	91	48	11			143	1.2	16	0.6	0.09	8	2.99	7.13	0.92	3.83	1.17	0.393	1.18	0.22	1.47	0.3	0.83	0.125	0.83	0.128		0.02	0.12			120	90
Nulliak-Depleted	SG-109A	49.11	0.34	16.69	8.08	0.15	10.43	13.65	1.26	0.2	0.02	1.1		460	53	270	5	86	11	12	33		119	0.9	14	0.4		8.4	1.08	3.05	0.49	2.62	0.84	0.381	1.2	0.23	1.51	0.31	0.91	0.135	0.91	0.142			0.09			270	80
Nulliak-Depleted	SG-110	47.88	0.39	17.16	8.83	0.15	10.99	12.64	1.53	0.34	0.02	1.16		550	56	280	4	96	37	13			136	1	15	0.5		8.8	1.53	4.08	0.61	2.78	0.98	0.459	1.37	0.25	1.6	0.32	0.93	0.14	0.95	0.153			0.09			0	70
Median	median	48.17	0.38	16.69	8.83	0.16	12.06	12.82	1.26	0.33	0.02	0.75		810	53	260	4	89.5	42	12.5	4	39.5	146	0.95	15	0.5	0.12	8.2	1.755	4.935	0.715	3.28	0.985	0.3995	1.205	0.225	1.49	0.31	0.9	0.134	0.87	0.137		0.03	0.1			32.5	85
Nuvvuagittuq High-Ti unit	PC-5	49.55	1.125	15.21	12.0575	0.236	8.08	8.65	0.32	0.89	0.081	2.62		238.446		103.216	38.56	97.25				39	290.13	2.81	55.42			21.48
Nuvvuagittuq High-Ti unit	PC-129	52.38	0.761	14.16	10.5818	0.093	10.68	3.9	1.92	0.88	0.076	3.91		177.943	42	88.0464	28.34	48.71	221	20		35	259.558	2.53	54.3	1.6	0.73	16.4	4.77	11.3	1.48	6.86	1.86	0.505	2.12	0.46	3.15	0.66	2.07	0.33	2.14	0.325	3.1		0.19				150
Nuvvuagittuq High-Ti unit	PC-132	51.45	0.896	14.42	10.5818	0.215	8.69	8.28	1.9	1.09	0.079	1.83		142.656	37	45.1548	30.81	75.09	79	15		39	280.183	3.16	55.5	1.5	0.81	17.44	4.04	9.8	1.45	6.98	2.1	0.704	2.68	0.49	3.2	0.68	2.04	0.304	1.96	0.309	2.3		0.19				110
Nuvvuagittuq High-Ti unit	PC-171	48.98	1.093	14.71	14.5139	0.239	8.29	4.57	1.09	3.07	0.164	1.46		276.312	48	106.08	64.58	51.61	1730	24		37	277.542	3.12	88.73	2.6	1.13	40.5	3.56	14.8	2.85	15.8	5.28	2.19	6.35	1.25	7.99	1.58	4.69	0.7	4.48	0.67	2.9		0.23				120
Nuvvuagittuq High-Ti unit	PC-327	46.21	0.878	16.23	11.5896	0.219	14.04	3.78375	1.02	2.86	0.068	2.43		384.695		128.345	103.58	49.97				37	236.711	2.03	44.08			18.6
Nuvvuagittuq High-Ti unit	PC-328	53.14	0.814	15.75	10.2938	0.255	10.28	5.54	3.02	0.1	0.074	0.39		375.505		132.973	4.02	83.82				36	174.997	1.94	43.96			15.02
Nuvvuagittuq High-Ti unit	PC-407	49.36	1.041	15.27	14.424	0.176	7.39	8.36	0.17	0.58	0.079	2.32		252.733		127.967	22.41	75.15				34	269.67	2.44	50.08			17.28
Nuvvuagittuq High-Ti unit	PC-418	51.76	0.949	15.05	10.9687	0.244	10.84	3.83	2.34	1.58	0.08	1.65		275.43		115.836	62.48	104.45				33	183.67	2.52	54.92			19.41
Nuvvuagittuq High-Ti unit	PC-419	51.88	0.936	15.88	10.1589	0.226	8.73	4.68	2.82	1.75	0.097	1.55		343.059		127.861	62.92	125.95				29	199.528	2.38	49.79			18.71
Nuvvuagittuq High-Ti unit	PC-420	46.94	0.872	15.24	12.1384	0.223	13.86	3.24	1.88	1.57	0.066	2.84		391.216		179.995	46.48	58.51				32	256.375	2.23	44.56			16.33
Nuvvuagittuq High-Ti unit	PC-421	52.14	0.909	16.76	9.493	0.248	8.61	4.96	3.02	1.28	0.073	1.55		402.011	35	109.429	40.32	119.69	208	14		30	150.414	2.04	48.8	1.3	0.18	14.88	3.31	6.59	0.89	4.75	1.54	1	2.22	0.41	2.68	0.58	1.82	0.281	1.8	0.257	1.1		0.18				90
Nuvvuagittuq High-Ti unit	PC-422	54.24	0.625	14.46	10.3568	0.165	9.45	4.38	2.57	0.97	0.065	1.84		268.304		103.631	25.56	64.39				25	178.261	1.76	38.16			16.05
Nuvvuagittuq High-Ti unit	PC-423	48.42	1.263	14.65	12.5164	0.251	10.98	6.18	0.45	2.19	0.089	1.89		271.981	22	135.876	56.91	96.45	248	11		38	233.119	2.82	66.89	1.6	0.36	22.01	4.4	8.72	1.19	6.16	1.92	1.01	2.99	0.55	3.72	0.82	2.56	0.387	2.47	0.368	0.8		0.21				b.d.
Nuvvuagittuq High-Ti unit	PC-425	52.84	0.614	12.23	10.1049	0.115	9.41	4.67	0.85	3.16	0.044	5.03		279.927		112.537	43.52	23.12				24	278.397	1.48	32.47			16.66
Nuvvuagittuq High-Ti unit	PC-429	52.93	0.804	14.06	10.8697	0.298	6.62	8.82	0.55	2.11	0.079	2.26		423.156		165.236	53.59	84.23				29	214.221	3.57	61.29			18.28
Nuvvuagittuq High-Ti unit	PC-175	50.27	1.032	18.07	12.9483	0.138	6.88	1.06	0.6	3.6	0.042	4.02		464.666		154.225	122.41	10.83				38	292.63	2.48	48.55			13.86
Nuvvuagittuq High-Ti unit	PC-408A	47.56	1.016	15.34	15.4137	0.229	8.7	7.07	0.6	0.62	0.085	2.05		217.925		104.136	23.81	69.87				33	257.606	2.29	59.84			17.46
Nuvvuagittuq High-Ti unit	PC-408B	47.51	0.921	14.7	15.9176	0.231	9.12	7.29	0.55	0.45	0.106	1.77		197.089		71.5264	17.85	74.9				32	234.696	1.9	50.51			17.12
Nuvvuagittuq High-Ti unit	PC-424	53.82	1.208	14.73	12.5793	0.125	6.81	4.49	0.6	1.43	0.115	2.98		143.918		72.0154	45.35	73.03				37	238.915	3.29	73.26			15.81
Nuvvuagittuq High-Ti unit	PC-173A	45.82	0.733	15.26	12.1114	0.184	15.62	1.03	1.05	2.79	0.076	4.47		322.932		166.943	80.04	62.56				27	223.712	2.1	38.48			18.96
Nuvvuagittuq High-Ti unit	PC-173B	47.44	0.667	14.22	12.3634	0.196	15.46	2.05	1.23	1.56	0.069	3.81		330.661		168.892	46.22	42.82				34	241.872	1.67	35.21			22.84
Nuvvuagittuq High-Ti unit	PC-427	50.54	0.558	11.19	12.4984	0.28	15.41	4.62	0.17	0.57	0.019	3.34		1533.31		311.089	14.85	40.46				36	189.81	1.41	27.82			10.41
Nuvvuagittuq High-Ti unit	PC-453	45.36	0.96	14.02	13.4702	0.176	15.64	1.55	0.48	3.15	0.068	3.98		300.05		148.751	91.71	43.67				35	275.955	2.67	53.18			20.9
Nuvvuagittuq High-Ti unit	PC-514	50.97	1.46	18.74	10.33	0.1	5.34	2.89	0.94	5.21	0.08	3.12		289	54	145	125	108	745		5.3	34.4	361	4	81.1	2.5	0.656	20.1	5.7	14	2.1	10.3	3	1.5	3.1	0.6	4.1	1	2.7	0.4	2.4	0.4	6.3	0.19	0.25
Nuvvuagittuq High-Ti unit	PC-533	53.74	0.71	14.83	12.12	0.13	12.48	0.82	0.29	0.87	0.05	3.45		160	42	89	29.2	18	78.9		1.4	61.1	309	1.9	41.7	1.3	0.788	13.6	4.1	9	1.3	5.7	1.7	0.2	2.1	0.4	2.8	0.6	1.9	0.3	1.9	0.3	5.1	0.168	0.12
Nuvvuagittuq High-Ti unit	PC-534	44.06	1.45	15.73	21.63	0.18	10.79	1.54	0.23	0.34	0.12	2.37		209	85	160	10.5	18	161		2.6	43.5	357	4.3	95	2.8	0.734	28.5	4.6	12.2	1.9	9.6	3.1	1	4.6	0.9	6.2	1.3	3.8	0.6	3.6	0.6	1.6	0.134	0.27
Nuvvuagittuq High-Ti unit	PC-540	52.09	0.76	14.64	11.38	0.23	12	4.7	2.44	0.23	0.08	0.83		256	45	126	6.5	61	47.1		1.9	33.1	174	2.4	45.4	1.4	1.23	12.4	4	8.6	1.3	6.1	2	1	2.4	0.4	2.6	0.6	1.6	0.2	1.6	0.3	1.2	0.141	0.19
Nuvvuagittuq High-Ti unit	PC-541	47.41	1.35	17.17	12.08	0.2	8.02	8.21	0.98	1.56	0.14	2.11		273	48	155	60.1	77	218		1.81	55.2	312	3.4	74	2.3	0.509	24.8	4.5	11	1.7	8.8	3.1	1	4.3	0.8	5.2	1.1	3	0.4	2.8	0.4	0.7	0.201	0.22
Nuvvuagittuq High-Ti unit	PC-542	46.16	1.56	16.34	16.34	0.2	8.1	5.37	0.39	1.59	0.14	2.49		84	50	106	68.1	57	115		1.4	47.3	365	4.2	89.6	2.8	0.822	27.5	6.2	15.7	2.4	12.2	3.9	1.6	5	0.9	6	1.3	3.5	0.5	3.2	0.5	5.8	0.372	0.27
Median	median	50.27	0.921	15.05	12.1114	0.215	9.41	4.62	0.94	1.56	0.079	2.37		275.43	45	127.861	45.35	64.39	208	15	1.855	35	256.375	2.44	50.51	1.6	0.734	17.46	4.4	11	1.48	6.98	2.1	1	2.99	0.55	3.72	0.82	2.56	0.387	2.4	0.368	2.3	0.179	0.21				115
Nuvvuagittuq Depleted Low-Ti unit	PC-54	53.96	0.419	18.48	7.27046	0.157	6.9	7.24	1.35	1.85	0.063	1.54		136.741		97.632	55.7	63.2				44	152.347	2.23	37.5			13.86
Nuvvuagittuq Depleted Low-Ti unit	PC-65	49.88	0.377	16.68	9.91591	0.25	9.25	8.69	1.02	0.72	0.035	2.35		267.119		138.132	18.37	81.01				44	223.695	0.87	22.72			13.86
Nuvvuagittuq Depleted Low-Ti unit	PC-66	49.86	0.371	16.7	9.53799	0.189	10.3	8.23	1.25	0.81	0.024	1.65		286.348		132.458	26.97	53.32				47	223.909	1.38	23.22			13.56
Nuvvuagittuq Depleted Low-Ti unit	PC-68	49.6	0.396	16.99	9.80793	0.171	9.48	8.09	2.07	0.68	0.041	1.8		163.35		125.454	20.17	64.19				44	210.004	1.71	30.08			12.78
Nuvvuagittuq Depleted Low-Ti unit	PC-123	50.09	0.369	17.41	8.9801	0.198	10.03	4.1	2.08	3.15	0.037	3.06		170.579		134.034	111.54	225.57				40	208.23	2.21	29.52			10.32
Nuvvuagittuq Depleted Low-Ti unit	PC-131	50.29	0.34	16.39	8.87213	0.18	11.43	5.17	2.06	1.93	0.033	2.91		407.995	45	184.016	63.77	125.93	153	13		45	205.422	1.2	21.79	0.8	0.46	11.79	2.8	5.7	0.7	2.94	0.78	0.4	1.2	0.24	1.77	0.43	1.43	0.226	1.54	0.259	3.2		0.05				80
Nuvvuagittuq Depleted Low-Ti unit	PC-151	50.37	0.378	17.39	9.29504	0.206	9.35	7.49	1.15	1.76	0.033	2.02		193.353	45	125.86	43.53	53.44	174	15		47	222.387	1.14	23.84	0.9	0.36	12.63	2.29	4.85	0.62	3.06	0.94	0.357	1.24	0.3	2.2	0.5	1.62	0.259	1.8	0.287	1.5		0.07				80
Nuvvuagittuq Depleted Low-Ti unit	PC-164	55.39	0.381	18.64	7.48642	0.156	4.92	4.94	1.86	1.72	0.044	3.63		202.267		97.5024	53.01	54.02				37	193.107	1.08	29.48			12.93
Nuvvuagittuq Depleted Low-Ti unit	PC-222	49.95	0.367	16.84	9.9249	0.217	9.82	8.93	1.32	0.51	0.025	1.75		195.509	49	142.966	13.75	59.41	86	14		46	231.109	1.07	24.63	0.8	0.28	11.66	2.2	4.78	0.59	2.84	0.81	0.361	1.18	0.28	2	0.45	1.49	0.248	1.68	0.272	0.5		0.06				80
Nuvvuagittuq Depleted Low-Ti unit	PC-227	53.95	0.294	14.56	9.75394	0.218	11.35	6.58	0.83	0.6	0.062	1.82		157.912	45	125.519	13.94	29.51	52	12		48	191.791	0.68	18.88	0.5	0.33	14.59	1.89	4.02	0.56	2.84	0.87	0.324	1.42	0.31	2.2	0.5	1.63	0.255	1.7	0.286	1.2		0.05				100
Nuvvuagittuq Depleted Low-Ti unit	PC-304	49.51	0.348	16.34	9.64596	0.195	9.79	8.19	1.76	0.4	0.029	3.52		254.05		147.656	11	47.38				47	200.497	0.76	21.56			11
Nuvvuagittuq Depleted Low-Ti unit	PC-312	50.08	0.367	17.07	9.466	0.194	11.07	8.22	1.19	0.64	0.029	1.3		353.713		156.672	16.65	46.69				43	229.296	0.95	21.39			10.66
Nuvvuagittuq Depleted Low-Ti unit	PC-410	49.84	0.38	17.7	9.30404	0.198	10.48	8.84	0.8	0.26	0.028	1.95		275.936	47	147.03	6.51	63.56	36	14		43	231.496	0.95	23.35	0.7	0.52	11.2	3.33	5	0.59	2.65	0.72	0.304	1.16	0.24	1.79	0.43	1.46	0.236	1.58	0.236	0.7		0.06				80
Nuvvuagittuq Depleted Low-Ti unit	PC-428	49.85	0.355	15.93	8.14328	0.172	11.11	4.9	2.25	2.91	0.034	3.87		362.041		166.893	72.08	92.33				43	200.49	0.94	22.26			12.06
Nuvvuagittuq Depleted Low-Ti unit	PC-431	49.74	0.382	17.48	9.30404	0.176	10.69	7.29	1.65	0.49	0.035	2.1		191.742	46	136.215	21.01	61.55	68	14		46	224.462	1.11	24.43	0.7	0.51	11.86	3.16	4.52	0.53	2.47	0.69	0.268	1.21	0.26	1.89	0.46	1.56	0.258	1.74	0.262	1.6		0.08				80
Nuvvuagittuq Depleted Low-Ti unit	PC-432	50.23	0.364	16.6	9.91591	0.225	9.75	8.63	1.67	0.59	0.036	1.24		196.452	46	130.075	18.61	50.57	79	13		44	229.725	1.01	21.33	0.6	0.34	12.67	2.97	5.14	0.65	3.03	0.85	0.336	1.31	0.28	1.96	0.47	1.6	0.259	1.74	0.268	1.2		0.05				70
Nuvvuagittuq Depleted Low-Ti unit	PC-433	50.75	0.366	16.71	9.34003	0.187	11.03	6.84	1.99	0.27	0.036	2.1		197.767	35	125.488	6.7	40.28	51	11		44	231.849	1.16	24.26	0.7	1.36	10.98	3	4.6	0.51	2.23	0.59	0.199	1.01	0.23	1.69	0.4	1.35	0.22	1.47	0.221	0.9		0.09				40
Nuvvuagittuq Depleted Low-Ti unit	PC-434	51.02	0.372	16.94	9.31303	0.205	9.37	9.94	1.39	0.31	0.04	0.79		189.621		122.094	7.86	41.66				44	236.39	0.97	22.3			12.35
Nuvvuagittuq Depleted Low-Ti unit	PC-437	55.31	0.462	18.64	6.52362	0.155	6.04	5.18	2.14	1.19	0.053	3.69		119.962		87.958	33.43	85.18				45	231.636	2.44	42.23			13.21
Nuvvuagittuq Depleted Low-Ti unit	PC-163	52.82	0.421	19.19	9.41201	0.287	6.97	2.3	2.31	1.74	0.034	4		249.953		99.897	51.54	52.41				48	254.663	1.44	27.18			15.13
Nuvvuagittuq Depleted Low-Ti unit	PC-165	65.66	0.405	15.99	9.15107	0.162	2.18	0.2	0.31	2.86	0.048	2.29		112.802		111.219	97.42	17.28				50	211.002	2.07	34.91			12.69	3.77	7.8	0.93	4.11	1.06	0.33	1.48	0.34	2.59	0.64	2.08	0.32	2.09	0.33
Nuvvuagittuq Depleted Low-Ti unit	PC-230	56.54	0.407	18.76	9.25005	0.387	4.39	5.08	1.76	1.23	0.043	2.18		284.956	42	85.7844	39.73	55.72	112	16		59	237.377	1.26	26.24	0.8	0.16	12.64	2.4	4.8	0.59	2.63	0.71	0.392	1.25	0.34	2.5	0.55	1.73	0.275	1.8	0.274	2		0.06				50
Nuvvuagittuq Depleted Low-Ti unit	PC-313	60.7	0.43	18.87	8.97111	0.171	3.01	0.43	0.5	3.37	0.024	3		364.701		189.467	85.88	11.63				50	265.093	1.09	24.43			11
Nuvvuagittuq Depleted Low-Ti unit	PC-401	60.05	0.332	16.06	11.8415	0.415	4.96	2.38	0.6	1.36	0.023	1.76		245.266	49	81.28	48.52	29.24	130	13		55	225.755	1.08	22.55	0.7	0.2	11.93	2.1	2.74	0.32	1.91	0.67	0.194	1.41	0.31	2.33	0.59	2.16	0.379	2.66	0.406	4.4		0.05				50
Nuvvuagittuq Depleted Low-Ti unit	PC-402	66.62	0.321	15.3	5.06593	0.119	3.01	4.72	1.56	1.1	0.032	2		235.347	23	68.0394	39.78	57.17	80	12		31	191.342	0.98	20.58	0.7	0.19	6.75	3.79	5.99	0.71	2.89	0.7	0.42	0.98	0.19	1.27	0.28	0.9	0.148	0.98	0.14	1.7		0.05
Nuvvuagittuq Depleted Low-Ti unit	PC-405	55.59	0.44	20.12	9.51099	0.284	4.85	2.73	1.34	3	0.038	1.92		228.964		90.0432	129.73	46.04				49	262.829	1.38	27.01			7.96
Nuvvuagittuq Depleted Low-Ti unit	PC-412	55.18	0.384	18.51	10.6987	0.269	6.28	2.525	0.56	2.49	0.038	2.29		263.306	50	142.612	72.56	30.23	149	14		55	232.098	1.06	24.31	0.7	0.19	13.86	2.49	3.36	0.4	2.03	0.62	0.209	1.44	0.33	2.47	0.58	1.85	0.299	1.97	0.29	3.5		0.07				40
Nuvvuagittuq Depleted Low-Ti unit	PC-135	48.5	0.356	16.41	11.5716	0.125	13.61	0.46	0.05	1.8	0.028	6.37		413.897	43	176.249	57.16	8.26	226	14		43	214.758	0.89	22.48	0.7	0.43	8.01	1.36	2.85	0.33	1.45	0.4	0.142	0.62	0.16	1.27	0.3	1.01	0.167	1.15	0.179	3.7		0.07				100
Nuvvuagittuq Depleted Low-Ti unit	PC-143	47.25	0.33	14.72	13.4612	0.147	14.24	0.12	0.03	2.26	0.024	6.24		333.078		187.693	106.72	4.33				42	205.481	1.07	21.51			7.79
Nuvvuagittuq Depleted Low-Ti unit	PC-223	46.3612	0.453	19.3538	9.466	0.151	13.7963	0.37	0.48	3.33	0.059	5.96		126.49		127.823	83.67	25.76				42	230.685	1.62	42.25			13.2
Nuvvuagittuq Depleted Low-Ti unit	PC-256	42.84	0.471	19.78	9.74494	0.185	16.57	0.25	0.52	3.64	0.05	5.7		136.042	51	135.119	177.19	10.72	190	17		43	220.607	2.44	40.7	1.2	1.53	13.77	3.92	8.16	1.04	4.46	1.19	0.131	1.69	0.36	2.45	0.53	1.66	0.258	1.76	0.29	33.9		0.17				110
Nuvvuagittuq Depleted Low-Ti unit	PC-404	47.78	0.403	17.3	13.2002	0.164	10.45	2.72	0.66	1.16	0.016	5.07		275.816		147.248	38.5	45.15				51	246.133	1.05	18.51			15.69
Nuvvuagittuq Depleted Low-Ti unit	PC-411	48.39	0.384	18.3	11.0227	0.255	11.05	2.81	0.47	0.89	0.032	5.76		262.585		143.081	26.51	34.67				43	248.954	0.95	24.03			9.87
Nuvvuagittuq Depleted Low-Ti unit	PC-426	50.78	0.29	14.79	11.0227	0.111	13.59	0.25	0.03	1.34	0.028	6.62		357.169	37	174.543	41.98	4.19	72	11		44	189.145	0.77	19.61	0.6	0.45	10.14	2.47	3.11	0.37	1.77	0.51	0.226	0.98	0.2	1.52	0.37	1.27	0.202	1.34	0.205	3		0.04				60
Nuvvuagittuq Depleted Low-Ti unit	PC-430	45.45	0.445	18.57	9.39402	0.205	14.38	0.78	0.39	2.45	0.028	7.37		173.005	34	138.574	124.74	20.39	278	13		41	231.594	1.19	33.05	0.9	1.37	10.95	8.07	13.4	1.42	5.55	1.25	0.25	1.51	0.27	1.87	0.44	1.5	0.241	1.61	0.248	9		0.17				40
Nuvvuagittuq Depleted Low-Ti unit	PC-444	49.49	0.363	16.1525	9.03409	0.18	13.83	3.25	1.44	1.41	0.036	3.92		192.277		154.766	33.39	20.65				43	242.735	0.85	21.42			11.49
Nuvvuagittuq Depleted Low-Ti unit	PC-445	49.38	0.327	15.15	10.2128	0.21	15.06	2.61	0.63	0.96	0.04	4.93		219.744		148.138	25.91	20.79				44	202.596	1.78	20.43			13.21
Nuvvuagittuq Depleted Low-Ti unit	PC-520	49.66	0.36	16.93	10.03	0.25	10.22	7.95	1.03	0.27	0.04	2.86		224	49	149	7.7	51	48		3	57.7	194	0.7	22.6	0.8	0.51	13.9	2.3	4.7	0.6	2.7	0.8	0.3	1.4	0.3	2.4	0.6	1.7	0.3	1.8	0.3	1.6	0.112	0.06
Nuvvuagittuq Depleted Low-Ti unit	PC-521	48.97	0.37	17.42	9.01	0.23	10.07	8.61	1.32	0.83	0.03	2.74		395	48	181	21.5	59	59.7		3.5	55	222	1.1	24	0.8	0.612	11.3	2.2	4.1	0.5	2.4	0.8	0.3	1.2	0.3	2	0.5	1.5	0.2	1.6	0.3	1.4	0.127	0.07
Nuvvuagittuq Depleted Low-Ti unit	PC-543	49.8	0.41	15.75	9.98	0.13	13.03	1.94	1.38	0.79	0.03	6.28		189	47	102	35.2	27	72.7		10	48.1	220	0.6	20.1	0.7	0.251	11.4	1.4	3	0.5	2.3	0.9	0.4	1.4	0.3	2.2	0.5	1.6	0.2	1.6	0.3	3.6	0.064	0.05
Nuvvuagittuq Depleted Low-Ti unit	PC-544	49.27	0.35	16.9	13.97	0.12	14.56	0.12	0.15	0.46	0.03	3.19		410	56	206	12.9	3	36.5		1.2	46.6	217	0.8	22.1	0.7	0.508	5.6	1.6	3.1	0.4	1.7	0.5	0.2	0.7	0.1	1.1	0.3	0.9	0.1	1	0.2	2.2	0.086	0.06
Nuvvuagittuq Depleted Low-Ti unit	PC-546	51.41	0.43	17.55	8.89	0.2	10.46	8.46	1.53	0.04	0.04	0.48		270	44	114	1.1	54	13.9		8.7	63.6	248	0.7	21.5	0.7	0.215	13.2	1.2	2.7	0.4	2.1	0.9	0.4	1.5	0.3	2.4	0.6	1.7	0.3	1.7	0.3	0.5	0.071	0.05
Median	median	50.015	0.3745	16.965	9.466	0.1915	10.26	4.92	1.285	1.175	0.0345	2.8		232.155	46	135.667	36.85	47.035	79	13.5	3.5	44.5	223.802	1.075	23.285	0.7	0.43	11.995	2.435	4.65	0.575	2.64	0.79	0.302	1.245	0.29	2	0.485	1.58	0.2515	1.69	0.273	1.7	0.086	0.06				80
Nuvvuagittuq Enriched Low-Ti unit	PC-59	52.04	0.496	16.58	9.70895	0.234	8.26	8.26	1	0.4	0.047	2.1		177.164		98.3703	13.38	94.27				40	185.215	3.19	56.13			13.59
Nuvvuagittuq Enriched Low-Ti unit	PC-149	53.06	0.514	16.15	8.44922	0.176	9.58	6.82	1.22	1.48	0.04	2.18		239.024	41	82.5396	33.71	44.61	188	16		42	226.629	2.01	38.6	1.2	1.27	12.02	4.82	9.69	1.15	4.71	1.22	0.602	1.49	0.33	2.24	0.49	1.58	0.257	1.7	0.254	1.4		0.16				90
Nuvvuagittuq Enriched Low-Ti unit	PC-150	54.92	0.518	16.18	8.31424	0.184	10.27	5.01	1.79	0.1	0.054	2.57		240.293		81.002	2.36	24.66				47	205.636	2	39.63			12.57
Nuvvuagittuq Enriched Low-Ti unit	PC-159	54.9	0.473	16.17	10.2308	0.267	6.79	5.15	2.02	1.37	0.04	2.22		136.55		85.5985	36.97	59.02				37	204.525	3.37	60.77			19.94
Nuvvuagittuq Enriched Low-Ti unit	PC-162	52.42	0.458	15.46	9.15107	0.219	9.42	7.6	1.2	1.01	0.047	2.46		351.213	43	136.148	29.14	56.27	175	14		38	180.588	2.75	49.09	1.4	1.79	13.97	5.48	11.2	1.38	5.93	1.55	0.527	1.99	0.35	2.3	0.5	1.56	0.245	1.66	0.27	0.9		0.23				90
Nuvvuagittuq Enriched Low-Ti unit	PC-250	57.92	0.563	16.06	7.81935	0.206	6.12	6.92	1.53	0.94	0.064	1.91		139.037	32	63.3591	26.06	99.34	106	15		38	188.857	3.46	62.33	1.7	3.82	13.74	12.7	24.7	3.03	11.2	2.4	0.885	2.55	0.41	2.49	0.52	1.54	0.231	1.51	0.239	1.2		0.29				90
Nuvvuagittuq Enriched Low-Ti unit	PC-157	53.08	0.6	17.4825	10.3748	0.374	6.31	2.87	1.95	2.73	0.062	3.5		160.296		87.0129	82.54	38.04				44	223.276	4.2	67.7			17
Nuvvuagittuq Enriched Low-Ti unit	PC-160	55.41	0.618	17.53	12.2644	0.1	6.77	0.14	0.16	1.81	0.062	4.2		180.011	50	132.928	59.64	16.43	124	19		36	228.358	4.28	67.21	2	2.91	14.67	11.9	23.8	2.67	10.4	2.5	0.707	2.41	0.48	3.16	0.66	2.07	0.319	2.06	0.313	2.2		0.34				90
Nuvvuagittuq Enriched Low-Ti unit	PC-161A	66.65	0.446	13.91	6.06472	0.134	2.49	4.88	0.88	2.04	0.052	2.34		123.275		65.9172	71.08	45.95				26	158.929	2.83	50.31			7.1
Nuvvuagittuq Enriched Low-Ti unit	PC-161B	54.17	0.624	17.51	9.484	0.244	3.99	7.36	1.09	2.57	0.078	2.68		165.051		65.1168	82.99	53.43				44	234.763	4.01	65.06			18.68
Nuvvuagittuq Enriched Low-Ti unit	PC-225	52.76	0.58	16.88	14.6399	0.15	7.11	0.13	0.07	2.7	0.068	3.94		161.833	52	162.285	85.83	7.5	178	18		44	212.93	3.84	66.76	1.9	2.59	16.47	7.01	14.1	1.59	6.61	1.67	0.51	2.13	0.47	3.23	0.7	2.3	0.372	2.49	0.389	3.3		0.32				80
Nuvvuagittuq Enriched Low-Ti unit	PC-247	56.24	0.668	18.37	12.8943	0.136	4.63	0.36	0.12	3.16	0.063	2.69		194.074		133.894	125.46	6.52				59	262.744	4.03	72.03			20.9
Nuvvuagittuq Enriched Low-Ti unit	PC-267	52.37	0.587	15.96	12.4624	0.311	8.11	3.09	1.79	1.64	0.097	3.41		146.028	55	88.3883	41.29	66.93	284	20		51	217.918	4.06	61.91	2.2	3.98	19.15	16.3	31.3	3.75	14.8	3.38	0.697	3.73	0.72	4.85	1.07	3.33	0.519	3.47	0.551	2.2		0.4				100
Nuvvuagittuq Enriched Low-Ti unit	PC-275	55.73	0.648	18.09	12.5523	0.221	5.36	0.87	0.29	3.25	0.065	2.57		167.313	42	87.668	107.41	11.62	261	17		55	246.339	4.01	71.72	2.1	3.56	19.32	16.4	31.3	3.35	13.5	2.86	0.634	3.2	0.69	4.59	0.97	3.1	0.479	3.12	0.488	3.8		0.27				70
Nuvvuagittuq Enriched Low-Ti unit	PC-276	56.42	0.576	17.11	9.15107	0.204	4.62	2.3	0.1	4.07	0.108	4.52		264.324	40	105.039	113.68	18.64	850	16		43	210.87	3.78	61.43	1.7	2.83	18.69	11.5	22.5	2.67	10.8	2.71	0.848	3.19	0.6	3.84	0.81	2.43	0.366	2.34	0.361	5.6		0.24				80
Nuvvuagittuq Enriched Low-Ti unit	PC-277	63.11	0.53	15.62	7.43243	0.132	3.91	0.72	0.12	4.42	0.055	3.48		238.357		93.093	130.81	10.39				39	199.499	3.12	55.73			5.55
Nuvvuagittuq Enriched Low-Ti unit	PC-278	57.69	0.589	17.56	9.61897	0.312	3.56	1.69	0.21	4.41	0.066	3.78		155.169	40	74.0259	143.7	13.96	505	17		40	214.385	4.03	67.47	2	3.48	15.06	13	25.6	2.81	11.2	2.59	0.702	2.78	0.55	3.51	0.75	2.37	0.373	2.45	0.384	3.1		0.34				60
Nuvvuagittuq Enriched Low-Ti unit	PC-279	41.22	0.828	26.29	13.3982	0.215	4.9	0.13	0.11	7.04	0.033	4.76		223.542		103.931	189.35	20.41				36	285.835	5.56	97.92			8.66
Nuvvuagittuq Enriched Low-Ti unit	PC-280	53.17	0.592	17.94	9.42101	0.292	5.41	3.15	0.48	4.42	0.059	4.84		161.853		81.838	136.4	26.68				41	226.583	3.86	67.16			12.48
Nuvvuagittuq Enriched Low-Ti unit	PC-281	54.17	0.586	17.59	13.3622	0.367	4.31	1.42	0.13	4.05	0.072	3.22		309.797		101.704	136.83	15.52				45	219.557	3.71	61.14			14.75
Nuvvuagittuq Enriched Low-Ti unit	PC-282	57.8	0.567	16.96	11.3376	0.367	4.27	1.65	0.54	3.25	0.073	2.92		318.984	32	81.5866	104.9	16.22	238	15		50	211.26	3.45	58.79	1.5	2.56	19.75	9.77	19.6	2.39	9.56	2.33	0.492	3.3	0.64	4.25	0.92	2.79	0.418	2.72	0.428	3.3		0.27				60
Nuvvuagittuq Enriched Low-Ti unit	PC-438	57.8	0.667	18.08	9.24105	0.062	5.39	0.19	0.16	3.75	0.069	3.71		188.984	65	171.91	101.01	5.22	291	18		20	244.916	4	71.02	1.9	2.79	8.57	9.76	17.4	1.86	7.13	1.63	0.369	1.81	0.28	1.68	0.35	1.07	0.16	1.02	0.154	3.8		0.31				90
Nuvvuagittuq Enriched Low-Ti unit	PC-447	52.62	0.574	16.17	11.5356	0.258	7.6	3.1	2	1.39	0.072	3.55		138.554		82.2525	31.21	72.94				46	210.666	3.68	62.48			12.58
Nuvvuagittuq Enriched Low-Ti unit	PC-452	55.09	0.573	16.13	12.1834	0.147	6.36	0.66	0.03	3.63	0.067	3.78		263.352	45	147.907	108.29	8.06	739	17		39	215.897	3.82	60.06	1.6	2.46	10.44	10.2	18.6	2.02	8.14	1.96	0.457	2.57	0.46	2.99	0.65	2.09	0.32	2.04	0.295	7		0.44				60
Nuvvuagittuq Enriched Low-Ti unit	PC-152	48.7	0.619	16.18	9.96989	0.195	15.85	0.28	0.35	0.43	0.042	6.79		145.662	49	88.201	10.26	4.22	11	18		38	219.151	3.5	64.9	1.9	2.88	15.14	12.6	24.3	2.7	10.6	2.33	0.385	2.27	0.46	2.88	0.59	1.85	0.304	2.03	0.317	4.3		0.36				130
Nuvvuagittuq Enriched Low-Ti unit	PC-251	50.14	0.516	15.68	10.7077	0.212	13.72	0.33	0.12	2.66	0.06	5.5		122.378	45	72.128	70.38	7.85	124	16		37	195.216	3.58	60.12	1.7	2.62	15.75	9.1	18.1	2	8.08	1.88	0.363	2.22	0.48	3.22	0.69	2.15	0.332	2.16	0.337	4.6		0.34				100
Nuvvuagittuq Enriched Low-Ti unit	PC-274	50.35	0.562	16.18	10.0419	0.172	13.67	0.14	0.05	1.74	0.064	6.61		139.414	47	86.1597	52.79	3.23	199	17		42	208.775	4.23	63.32	1.8	2.8	14.92	12.2	23.2	2.49	10.1	2.24	0.615	2.49	0.51	3.38	0.72	2.23	0.346	2.27	0.352	2.3		0.31				100
Nuvvuagittuq Enriched Low-Ti unit	PC-409	47.48	0.406	13.01	13.7041	0.192	16.64	3.2	0.41	0.73	0.037	3.08		1213.16		320.32	34.08	69.25				36	197.297	1.07	26.45			10.1
Nuvvuagittuq Enriched Low-Ti unit	PC-439	50.47	0.612	16.43	12.0305	0.178	10.1	0.92	0.24	2.7	0.07	5.09		202.382		117.131	86.49	16.39				40	205.716	3.96	66.34			16.37
Nuvvuagittuq Enriched Low-Ti unit	PC-440	53.03	0.543	15.37	9.85292	0.199	11	1.33	0.3	2.71	0.056	4.76		236.8		95.7432	81.61	20.19				39	197.784	3.16	55.77			13.3
Nuvvuagittuq Enriched Low-Ti unit	PC-441	49.11	0.554	15.86	11.1756	0.266	13.25	0.64	0.07	2.56	0.066	5.64		132.561		78.195	75.09	4.99				34	188.857	3.58	61.52			14.85
Nuvvuagittuq Enriched Low-Ti unit	PC-442	46.82	0.539	16.02	11.2206	0.279	15.31	0.36	0.04	1.71	0.049	7.08		237.118	49	101.193	42.55	4.02	82	16		40	204.981	2.93	54.56	1.6	1.51	11.3	5.39	9.26	1.06	4.63	1.2	0.225	1.65	0.32	2.15	0.48	1.56	0.243	1.62	0.249	3.3		0.27				100
Nuvvuagittuq Enriched Low-Ti unit	PC-443	46.01	0.526	16.85	10.5818	0.184	15.07	2.61	0.77	1.56	0.057	4.89		204.207	42	67.1389	36.22	48.45	70	14		38	206.725	1.41	38.22	1	0.69	11.62	2.52	4.09	0.51	2.48	0.72	0.121	1.32	0.27	1.94	0.44	1.41	0.214	1.38	0.214	3.2		0.13				80
Nuvvuagittuq Enriched Low-Ti unit	PC-515	52.87	0.49	16.41	8.48	0.17	9.11	3.99	1.37	2.76	0.06	4.1		145	41	96	61.7	63	425		3.5	41.8	196	3	53.8	1.6	2.54	13.8	8.6	16.2	1.9	7.7	1.9	0.6	2.2	0.4	2.7	0.6	1.7	0.3	1.7	0.3	1.8	0.694	0.24
Nuvvuagittuq Enriched Low-Ti unit	PC-516	59.3	0.63	18.14	9.68	0.14	3.56	0.88	0.94	3.48	0.08	2.77		273	62	160	100	30	400		2.3	37.9	247	3.7	65.2	1.9	2.92	16.4	10.2	20.1	2.4	9.8	2.4	0.6	2.8	0.5	3.5	0.8	2.3	0.3	2.2	0.4	4	0.666	0.26
Nuvvuagittuq Enriched Low-Ti unit	PC-517	54.46	0.49	16.24	8.17	0.21	8.49	6.17	1.17	1.9	0.05	2.32		175	38	101	58.3	85	241		3.8	45.4	152	2.7	48.5	1.4	2.01	12.4	7.6	14	1.7	6.7	1.6	0.6	1.9	0.3	2.4	0.5	1.6	0.2	1.5	0.3	1.5	0.441	0.21
Nuvvuagittuq Enriched Low-Ti unit	PC-532	44.47	0.39	10.84	9.38	0.2	21.75	6.51	0.28	0.07	0.03	5.44		1451	87	786	b.d.l.	3	16		1.3	25.9	168	2	38.6	1.3	0.9	15.2	4.2	11	1.7	8.3	2.4	0.5	2.6	0.5	3.1	0.7	1.9	0.3	1.8	0.3	0.2	0.248	0.14
Nuvvuagittuq Enriched Low-Ti unit	PC-545	49.58	0.42	12.12	10.67	0.22	14.65	8.44	0.76	0.67	0.05	1.36		1341	66	478	24.1	28	95.1		2.7	41.6	199	1.2	28.6	0.9	0.635	11.2	3.7	8.6	1.1	4.3	1.2	0.9	1.6	0.3	2.2	0.5	1.4	0.2	1.4	0.2	0.7	0.212	0.08
Median	median	53.07	0.565	16.21	10.1364	0.205	7.355	1.995	0.38	2.565	0.061	3.525		184.497	45	94.4181	71.08	20.3	193.5	17	2.7	40	209.721	3.58	61.285	1.7	2.605	14.32	9.765	18.35	2.01	8.22	2.1	0.6	2.34	0.465	3.045	0.655	1.985	0.302	2.035	0.3065	3.15	0.441	0.27				90
Ukaliq	IN14006	49.92	0.525	14.278	12.853	0.2637	12.71	5.196	1.272	1.293	0.04	1.66		804.3	57.12	154.1	71.61	112.8	47.47	14.1	3.444	47.37	236.3	1.253	36.51	1.132	0.467	15.55	3.131	6.852	0.923	4.183	1.289	0.46	1.781	0.331	2.427	0.578	1.592	0.248	1.737	0.274	0.695	0.118	0.112		0.179	11.94	125.9
Ukaliq	IN12031	52.38	0.556	16.488	11.597	0.2913	6.569	3.914	2.241	3.472		2.07		454.6	41.62	114.5	223.2	32.06	67.99	16.04	9.0634	55.48	257.3	1.444	33.74	0.919	0.505	15.38	3.577	8.302	1.088	4.965	1.455	0.493	1.774	0.345	2.366	0.514	1.506	0.241	1.683	0.275	5.245	0.816	0.118	0.755		27.25	85.44
Ukaliq	IN14029	52.85	0.525	15.11	10.903	0.2195	10.747	4.693	2.523	1.267		1.38		454.8	47.13	98.86	71.43	145	132.2	12.4	6.2813	48.15	215.3	1.186	32.23	0.998	0.503	13.13	3.02	6.005	0.756	3.261	1.011	0.443	1.453	0.273	2.047	0.498	1.429	0.222	1.554	0.242	1.754	0.118	0.114		0.422	55.76	85.71
Ukaliq	IN14032	50	0.492	14.373	11.61	0.2311	12.483	5.005	1.434	1.982	0.04	2.36		649.6	54.23	134.4	110.9	176	187.3	12.34	4.4394	46.2	215.4	1.146	30.78	0.993	0.616	12.93	3.338	6.863	0.958	4.266	1.169	0.423	1.472	0.271	1.983	0.476	1.373	0.212	1.457	0.231	2.681	0.126	0.098			38.96	101.2
Ukaliq	IN12034	50.35	0.494	14.608	11.49	0.2077	12.39	5.641	1.489	1.204		2.11		807.4	56.55	161.8	76.77	138.8	104	13.28	4.9878	48.77	224.5	1.191	34.43	0.999	0.59	12.37	3.085	6.653	0.841	3.715	1.065	0.445	1.338	0.258	1.867	0.419	1.248	0.206	1.435	0.225	1.029	0.139	0.095			13.62	88.07
Ukaliq	IN14015	50.32	0.534	11.94	14.34	0.323	8.057	9.316	1.198	2.011		1.61		1807	61.16	277.3	105.9	40.56	218.2	11.97	2.4748	42.12	214.6	1.122	28.2	0.847	0.28	13.3	2.285	5.652	0.81	3.872	1.215	0.425	1.582	0.291	2.047	0.488	1.349	0.201	1.396	0.222	0.674	0.074	0.091	1.239	0.949		117.5
Ukaliq	IN14003	48.75	0.96	15.293	12.82	0.271	7.935	7.871	2.431	1.277	0.06	2.06		269.4	45.35	263.6	52.79	101.9	84.16	17	5.5858	40.2	255	2.09	47.58	1.46	0.653	19.33	5.909	12.62	1.613	7.128	2.112	0.876	2.551	0.451	3.174	0.713	2.037	0.3	2.116	0.328	0.58	0.397	0.202	0.776	0.128	80.12	126.1
Ukaliq	IN14007	48.48	0.663	15.575	11.233	0.2515	8.428	9.052	1.879	2.253	0.05	1.89		411.1	45.41	217	113.4	86.74	133.7	15.26	6.5973	40.74	229.4	1.487	36.07	1.113	0.528	15.35	2.987	7.232	1.046	5.049	1.638	0.61	1.997	0.362	2.522	0.587	1.615	0.244	1.68	0.266	0.637	0.187	0.124		0.248	11.87	117.8
Ukaliq	IN14017	49.55	0.753	15.743	10.797	0.222	9.713	8.547	2.315	0.628	0.05	1.74		216.4	42.17	211.4	29.89	218.6	95.82	13.47	3.9336	37.3	214.7	1.702	41.75	1.252	0.757	14.37	2.776	6.289	0.898	4.508	1.502	0.533	1.905	0.34	2.405	0.556	1.526	0.233	1.555	0.242	0.605	0.151	0.165		0.223	20.81	115.9
Ukaliq	IN12013	49.93	0.638	14.82	10.573	0.2172	8.048	10.024	2.11	1.637		1.73		438.4	42.29	127.1	94.6	141.8	114.3	14.77	17.2544	42.1	222.9	1.632	39.66	1.114	0.678	14.85	4.073	8.413	1.117	5.212	1.661	0.59	1.842	0.353	2.409	0.524	1.476	0.241	1.639	0.256	0.446	0.198	0.151	0.468	0.141	50.68	107.3
Ukaliq	IN14004	53.29	1.172	12.724	12.46	0.2085	4.533	11.99	1.183	1.618	0.09	0.74		110.9	27.2	67.32	95.27	156.8	102.7	20.26	4.7152	42.7	322	2.806	69.21	2.158	0.447	26.55	3.234	9.368	1.5	7.851	2.689	1.058	3.354	0.618	4.376	1.013	2.771	0.411	2.883	0.452	0.352	0.104	0.231		0.302	75.41	71.34
Ukaliq	IN14012	47.66	1.176	15.103	14.96	0.2142	7.262	9.861	2.013	1.116	0.09	0.6		203.9	48.66	201.9	57.19	104.8	138	17.52	2.4834	43.52	299.2	2.771	65.03	1.97	0.429	25.32	4.209	10.54	1.631	8.376	2.729	1.002	3.346	0.605	4.24	0.964	2.665	0.395	2.72	0.424	4.854	0.111	0.221	1.196	0.439	8.758	112.2
Ukaliq	IN14016	48.37	1.014	14.578	13.76	0.2358	7.685	9.983	2.445	0.787	0.07	0.83		268.3	47.03	202.7	26.66	118.1	70.31	16.9	4.8435	42.83	275.4	2.13	52.04	1.594	0.321	21.68	3.293	8.493	1.332	6.75	2.285	0.821	2.847	0.515	3.586	0.823	2.284	0.337	2.343	0.358	0.376	0.084	0.161	0.673	0.542	80.85	92.44
Ukaliq	IN14022	48	1.009	14.643	13.893	0.2243	7.382	10.548	2.62	0.809	0.07	0.48		276.1	48	144.6	32.26	107.5	88.89	16.83	4.2208	42.51	272.1	2.082	50.53	1.539	0.299	20.97	2.999	8.053	1.275	6.523	2.205	0.832	2.774	0.497	3.498	0.802	2.195	0.325	2.267	0.361	2.528	0.085	0.164	0.509	0.428	39.12	107.4
Ukaliq	IN14019	49.18	0.772	14.975	13.557	0.2129	7.666	10.478	1.892	0.686	0.05	0.63		279.1	47.42	144.1	33.32	128.3	32.31	16.34	3.6779	47.32	244.5	1.414	35.08	1.094	0.181	16.59	1.907	5.423	0.879	4.627	1.608	0.638	2.136	0.379	2.719	0.626	1.757	0.264	1.828	0.288	0.514	0.045	0.114		0.321	25.81	89.31
Ukaliq	IN14009	46.51	1.047	15.2	14.18	0.282	9.361	6.804	1.05	3.037	0.07	2.26		356	56.96	393.8	145	120.3	1098	17.41	8.0518	47.77	296.6	2.165	44.59	1.39	0.214	21.95	2.938	8.284	1.326	6.861	2.274	0.875	2.802	0.512	3.587	0.831	2.294	0.347	2.391	0.374	1.563	0.073	0.143		0.174	44.31	86.22
Ukaliq	IN12018	47.84	0.854	15.138	11.903	0.1827	7.698	10.54	3.026	0.983	0.04	1.42		292.6	46.84	153	32.34	135.2	59.92	16.73	2.6818	40.75	246.7	1.784	43.64	1.211	0.301	17.37	3.438	7.747	1.144	5.65	1.808	0.714	2.226	0.415	2.827	0.601	1.734	0.277	1.905	0.295	0.213	0.15	0.152			65.03	54.8
Ukaliq	IN12015	47.8	0.871	14.893	12.153	0.2279	7.8	9.215	2.584	1.344	0.04	1.99		293.1	49.56	153.7	55.67	148.2	121.7	16.85	14.4641	40.54	249.5	1.813	48.34	1.387	0.267	18.41	3.725	8.677	1.27	6.36	1.984	0.736	2.396	0.446	2.953	0.644	1.833	0.296	2.027	0.314	0.328	0.108	0.153		0.138	97.91	140.3
Ukaliq	IN14002	47.88	1.294	16.318	11.73	0.2129	7.496	9.466	2.681	1.23	0.12	1.46		182.2	60.41	174.3	42.44	343.7	154.1	19.42	10.3358	40.44	297.4	3.075	77.06	2.187	0.522	27.94	7.952	17.46	2.345	10.8	3.074	1.52	3.663	0.643	4.452	1.023	2.836	0.422	2.943	0.457	0.389	0.249	0.253	0.599	0.189	123.3	74.05
Ukaliq	IN12032	52.24	0.613	16.583	10.42	0.2038	5.821	8.401	2.966	1.136		1.44		219	40.27	88.15	45.79	96.37	104.4	15.56	7.9956	49.02	220.6	2.925	62.66	1.708	2.121	18.4	8.826	18.41	2.245	9.216	2.206	0.733	2.422	0.44	2.871	0.614	1.797	0.288	1.998	0.319	1.167	0.511	0.256	0.74		39.83	90.62
Ukaliq	IN12036	48.88	1.168	13.202	17.975	0.2797	5.639	9.75	1.157	1.01	0.07	0.8		35.71	52.36	48.77	44.61	92.07	42.42	18.52	4.6687	50.51	303.7	2.297	69.39	1.932	0.712	26.95	4.467	10.51	1.561	7.884	2.717	0.958	3.353	0.631	4.237	0.918	2.621	0.428	2.834	0.447	0.368	0.231	0.19	0.969	0.356	6.912	102.6
Ukaliq	IN14020	49.39	1.49	12.834	18.155	0.2816	5.66	8.844	1.497	0.647	0.12	0.54		212	48.73	114.4	21.7	74.59	43	19.38	9.564	42.68	318.5	4.734	95.69	2.801	0.711	32.88	7.463	19.52	2.851	13.4	4.045	1.421	4.63	0.814	5.467	1.252	3.366	0.508	3.472	0.536	0.554	0.348	0.488	1.779	0.53	50.19	111.8
Ukaliq	IN14024	46.38	0.111	7.396	8.34	0.1028	29.57	1.175	0.209	0.66		5.56		3252	78.51	858	43.36	7.131	13.99	7.871	1.6012	27.59	99.21	0.184	5.014	0.185	0.086	3.559	0.221	0.429	0.054	0.236	0.101	0.036	0.222	0.049	0.468	0.129	0.401	0.067	0.493	0.084	4.624	0.063	0.013		0.125		111.6
Median	median	49.18	0.772	14.893	12.153	0.2243	7.8	9.052	2.013	1.23	0.065	1.61		292.6	48	153.7	55.67	118.1	102.7	16.34	4.8435	42.7	246.7	1.784	43.64	1.252	0.503	17.37	3.293	8.284	1.144	5.65	1.808	0.714	2.226	0.415	2.827	0.614	1.757	0.277	1.905	0.295	0.637	0.126	0.152	0.755	0.275	39.83	102.6
Acasta-Amphibolite group I	AC177	50.32	1.16	13.82	13.33	0.23	6.29	10.07	1.93	0.63	0.09			152	50.6	84.4	12.9	113	43.5		1.94		338	3.35	66.8	1.97	0.622	23.8	4.69	12.4	1.81	9.29	2.79	0.973	3.87	0.677	4.61	0.99	2.93	0.426	2.86	0.447	0.146	0.153	0.179			127	105
Acasta-Amphibolite group I	AC179	50.24	1.05	14.59	12.3	0.21	6.43	10.34	2.14	0.69	0.09			208	47.1	84.3	14	136	56		1.76		328	3.26	66.9	1.97	0.608	23.4	3.67	10.1	1.56	8.21	2.63	0.984	3.75	0.657	4.52	0.981	2.91	0.422	2.81	0.44	0.12	0.154	0.176			68	104
Acasta-Amphibolite group I	AC181	50.34	0.87	14.05	13.33	0.22	6.64	10.51	1.96	0.47	0.08			180	50.8	87.5	6.98	155	56.2		2.45		269	2.82	56.2	1.7	0.592	21.1	3.77	10.3	1.4	7.25	2.3	1.18	3.3	0.595	4.06	0.897	2.6	0.379	2.51	0.391	0.041	0.193	0.154			38.6	114
Acasta-Amphibolite group I	AC234	50.14	1.03	13.89	14.33	0.23	6.42	9.95	1.66	0.84	0.08			158	50.7	77.1	22.9	128	108		2.5		341	2.75	54.7	1.63	0.527	21.1	3.88	9.91	1.48	7.59	2.34	0.866	3.39	0.589	3.96	0.865	2.54	0.378	2.53	0.391	0.202	0.131	0.147			128	107
Acasta-Amphibolite group I	AC489	49.97	1.17	14.3	13.65	0.2	6.37	10.47	2.04	0.54	0.1			160	45.5	97.1	13	119	57.4		3.08		345	4.26	70.3	2.02	0.724	23.4	4.38	12	1.73	8.89	2.71	1.01	3.82	0.674	4.47	0.959	2.82	0.414	2.74	0.419	0.186	0.238	0.249			49.9	109
Acasta-Amphibolite group I	AC384	50.13	0.76	14.66	10.86	0.21	7.82	10.3	2.45	1.02	0.06			261	47.5	149	18.9	132	49.9		9.34		274	2.13	42.8	1.28	0.428	16.9	3.09	7.68	1.13	5.83	1.84	0.721	2.64	0.472	3.25	0.697	2.08	0.303	2.04	0.318	0.128	0.429	0.132			31.9	105
Acasta-Amphibolite group I	AY9	49.57	1.12	13.68	14.64	0.23	6.37	9.86	2.2	0.52	0.09			133	48.7	76.6	5.32	297	157		4.27		368	3.53	62	1.84	0.597	22.5	4.42	11	1.65	8.45	2.55	0.941	3.64	0.634	4.3	0.935	2.74	0.412	2.75	0.426	0.095	0.168	0.163			17.2	113
Median	median	50.14	1.05	14.05	13.33	0.22	6.42	10.3	2.04	0.63	0.09			160	48.7	84.4	13	132	56.2		2.5		338	3.26	62	1.84	0.597	22.5	3.88	10.3	1.56	8.21	2.55	0.973	3.64	0.634	4.3	0.935	2.74	0.412	2.74	0.419	0.128	0.168	0.163			49.9	107
References:
Caro, G., Morino, P., Mojzsis, S.J., Cates, N.L., Bleeker, W., 2017. Sluggish Hadean geodynamics: Evidence from coupled 146,147Sm–142,143Nd systematics in Eoarchean supracrustal rocks of the Inukjuak domain (Québec). Earth and Planetary Science Letters 457, 23-37.
Furnes, H., Rosing, M., Dilek, Y., de Wit, M., 2009. Isua supracrustal belt (Greenland)—A vestige of a 3.8 Ga suprasubduction zone ophiolite, and the implications for Archean geology. Lithos 113, 115-132.
Friend, C.R.L., Nutman, A.P., 2010. Eoarchean ophiolites? New evidence for the debate on the Isua supracrustal belt, southern West Greenland. American Journal of Science 310, 826-861.
Hoffmann, J.E., Münker, C., Polat, A., Rosing, M.T., Schulz, T., 2011. The origin of decoupled Hf–Nd isotope compositions in Eoarchean rocks from southern West Greenland. Geochimica et Cosmochimica Acta 75, 6610-6628.
Jenner, F.E., Bennett, V.C., Nutman, A.P., Friend, C.R.L., Norman, M.D., Yaxley, G., 2009. Evidence for subduction at 3.8 Ga: Geochemistry of arc-like metabasalts from the southern edge of the Isua Supracrustal Belt. Chemical geology 261, 83-98.
Koshida, K., Ishikawa, A., Iwamori, H., Komiya, T., 2016. Petrology and geochemistry of mafic rocks in the Acasta Gneiss Complex: Implications for the oldest mafic rocks and their origin. Precambrian Research 283, 190-207.
Nakamura, H., Sano, A., Kagami, S., Yokoyama, T., Ishikawa, A., Komiya, T., Iwamori, H., 2020. Compositional heterogeneity of Archean mantle estimated from Sr and Nd isotopic systematics of basaltic rocks from North Pole, Australia, and the Isua supracrustal belt, Greenland. Precambrian Research 347, 105803.
Nutman, A.P., Friend, C.R.L., Bennett, V.C., Van Kranendonk, M., Chivas, A.R., 2019. Reconstruction of a 3700 Ma transgressive marine environment from Isua (Greenland): Sedimentology, stratigraphy and geochemical signatures. Lithos 346-347, 105164.
O’Neil, J., Francis, D., Carlson, R.W., 2011. Implications of the Nuvvuagittuq Greenstone Belt for the Formation of Earth’s Early Crust. Journal of Petrology 52, 985-1009.
O'Neil, J., Carlson, R.W., Papineau, D., Levine, E.Y., Francis, D., 2019. Chapter 16 - The Nuvvuagittuq Greenstone Belt: A Glimpse of Earth's Earliest Crust, in: Van Kranendonk, M.J., Bennett, V.C., Hoffmann, J.E. (Eds.), Earth's Oldest Rocks (Second Edition). Elsevier, pp. 349-374.
Polat, A., Hofmann, A.W., Rosing, M.T., 2002. Boninite-like volcanic rocks in the 3.7–3.8 Ga Isua greenstone belt, West Greenland: geochemical evidence for intra-oceanic subduction zone processes in the early Earth. Chemical Geology 184, 231-254.
Polat, A., Hofmann, A.W., 2003. Alteration and geochemical patterns in the 3.7–3.8 Ga Isua greenstone belt, West Greenland. Precambrian Research 126, 197-218.
Wasilewski, B., O'Neil, J., Rizo, H., 2019. Geochemistry and petrogenesis of the early Archean mafic crust from the Saglek-Hebron Complex (Northern Labrador). Precambrian Research 328, 321-343.
[truncated: 9 more columns]

## Sheet: Table S8
Table S8 Lu-Hf isotopic composition of magmatic/recrystallized zircons from >3.5 Ga granitoids around the world
Area	Unit	Rock type a	Analysis number	Age used for εHf(t) calculation in original article (Ma)	Age used for εHf(t) calculation in this article (Ma) b	176Lu/177Hf	176Hf/177Hf	error	εHf(t) value in original article	εHf(t) value after recalculating c	error	Average of εHf(t) value	2SE d	Range of εHf(t) variation	Reference
zircons from >3.5 Ga granitoids around the world
Bundelkhand Craton, India		trondhjemite gneiss	271-a372	3550	3550	0.00205	0.280638	2.8e-05	0.5	0.532667	0.998279	-0.746139	0.321411	2.9129	Kaur et al., 2014
Bundelkhand Craton, India		trondhjemite gneiss	272-a373	3550	3550	0.00361	0.280681	2.8e-05	-1.8	-1.74547	0.998279				Kaur et al., 2014
Bundelkhand Craton, India		trondhjemite gneiss	273-a374	3550	3550	0.00141	0.280554	2.8e-05	-0.9	-0.898597	0.998279				Kaur et al., 2014
Bundelkhand Craton, India		trondhjemite gneiss	273-a375	3550	3550	0.00078	0.280534	2.5e-05	-0.1	-0.0725106	0.891321				Kaur et al., 2014
Bundelkhand Craton, India		trondhjemite gneiss	274-a376	3550	3550	0.00196	0.28058	2.2e-05	-1.3	-1.31532	0.784362				Kaur et al., 2014
Bundelkhand Craton, India		trondhjemite gneiss	275-a377	3550	3550	0.00109	0.280527	2.7e-05	-1.1	-1.07944	0.962627				Kaur et al., 2014
Bundelkhand Craton, India		trondhjemite gneiss	277-a379	3550	3550	0.00106	0.280539	2.7e-05	-0.6	-0.57831	0.962627				Kaur et al., 2014
Bundelkhand Craton, India		trondhjemite gneiss	278-a380	3550	3550	0.00186	0.280574	3.5e-05	-1.3	-1.28493	1.24785				Kaur et al., 2014
Bundelkhand Craton, India		trondhjemite gneiss	279-a381	3550	3550	0.00162	0.280559	2.8e-05	-1.2	-1.23338	0.998279				Kaur et al., 2014
Bundelkhand Craton, India		trondhjemite gneiss	280-a382	3550	3550	0.00127	0.280569	2.8e-05	0	-0.0217726	0.998279				Kaur et al., 2014
Bundelkhand Craton, India		trondhjemite gneiss	281-a388	3550	3550	0.0019	0.280583	2.5e-05	-1.1	-1.06178	0.891321				Kaur et al., 2014
Bundelkhand Craton, India		trondhjemite gneiss	281-a389	3550	3550	0.00165	0.280597	2.8e-05	0	0.0481348	0.998279				Kaur et al., 2014
Bundelkhand Craton, India		trondhjemite gneiss	282-a390	3550	3550	0.00171	0.280533	2.9e-05	-2.4	-2.38023	1.03393				Kaur et al., 2014
Bundelkhand Craton, India		trondhjemite gneiss	283-a391	3550	3550	0.00188	0.280603	2.4e-05	-0.3	-0.299858	0.855668				Kaur et al., 2014
Bundelkhand Craton, India		trondhjemite gneiss	284-a392	3550	3550	0.00226	0.280613	3e-05	-0.9	-0.871701	1.06959				Kaur et al., 2014
Bundelkhand Craton, India		trondhjemite gneiss	285-a393	3550	3550	0.00139	0.280563	2.5e-05	-0.5	-0.52886	0.891321				Kaur et al., 2014
Bundelkhand Craton, India		trondhjemite gneiss	286-a394	3550	3550	0.00212	0.280608	2.9e-05	-0.7	-0.707934	1.03393				Kaur et al., 2014
Bundelkhand Craton, India		trondhjemite gneiss	287-a395	3550	3550	0.00197	0.280599	2.5e-05	-0.7	-0.662346	0.891321				Kaur et al., 2014
Bundelkhand Craton, India		trondhjemite gneiss	288-a396	3550	3550	0.00045	0.280513	2.1e-05	0	-0.0150023	0.74871				Kaur et al., 2014
Nuvvuagittuq		Trond. Band	PC-287-2	3769.9	3757	0.000512519	0.280345	4.8e-05	-1.06955	-1.279	1.71218	-0.915428	0.381092	5.85591	OʼNeil et al., 2013
Nuvvuagittuq		Trond. Band	PC-287-3	3724.6	3757	0.000562263	0.280352	4.2e-05	-2.0166	-1.15823	1.49816				OʼNeil et al., 2013
Nuvvuagittuq		Trond. Band	PC-287-4	3763.7	3757	0.000582657	0.280397	2.2e-05	0.457065	0.394128	0.784751				OʼNeil et al., 2013
Nuvvuagittuq		Trond. Band	PC-287-6	3751.8	3757	0.000569674	0.280363	5.8e-05	-1.00254	-0.785052	2.06889				OʼNeil et al., 2013
Nuvvuagittuq		Trond. Band	PC-287-7	3755.2	3757	0.000422557	0.280354	5e-05	-0.86277	-0.724788	1.78353				OʼNeil et al., 2013
Nuvvuagittuq		Trond. Band	PC-287-8	3760.4	3757	0.000613848	0.280309	4.6e-05	-2.84061	-2.82581	1.64084				OʼNeil et al., 2013
Nuvvuagittuq		Trond. Band	PC-287-10	3754.7	3757	0.000801115	0.28037	3.8e-05	-1.28332	-1.13522	1.35548				OʼNeil et al., 2013
Nuvvuagittuq		Trond. Band	PC-287-11	3761.2	3757	0.000591632	0.280405	6.2e-05	0.660268	0.656239	2.21157				OʼNeil et al., 2013
Nuvvuagittuq		Trond. Band	PC-287-13	3756.8	3757	0.000566543	0.280358	4e-05	-1.05497	-0.955295	1.42682				OʼNeil et al., 2013
Nuvvuagittuq		Trond. Band	PC-287-14	3734	3757	0.000636132	0.280405	4.4e-05	-0.0947315	0.540899	1.5695				OʼNeil et al., 2013
Nuvvuagittuq		Trond. Band	PC-287-17	3745	3757	0.00127771	0.280378	6e-05	-2.45469	-2.08513	2.14023				OʼNeil et al., 2013
Nuvvuagittuq		Trond. Band	PC-287-18	3735.9	3757	0.000735052	0.280306	3.8e-05	-3.83593	-3.24697	1.35548				OʼNeil et al., 2013
Nuvvuagittuq		Trond. Band	PC-287-20	3746.7	3757	0.00060151	0.280409	5.4e-05	0.435941	0.773322	1.92621				OʼNeil et al., 2013
Nuvvuagittuq		Trond. Band	PC-287-21	3769.2	3757	0.000655128	0.280371	3.6e-05	-0.52907	-0.721169	1.28414				OʼNeil et al., 2013
Nuvvuagittuq		Trond. Band	PC-287-22	3768.7	3757	0.000410464	0.280388	4.6e-05	0.701094	0.519388	1.64084				OʼNeil et al., 2013
Nuvvuagittuq		Trond. Band	PC-287-36	3762.9	3757	0.000793289	0.280389	6.6e-05	-0.393377	-0.437178	2.35425				OʼNeil et al., 2013
Nuvvuagittuq		Trond. Band	PC-287-37	3752.1	3757	0.000348522	0.280359	5e-05	-0.566376	-0.354539	1.78353				OʼNeil et al., 2013
Nuvvuagittuq		Trond. Band	PC-287-38	3772.8	3757	0.00123094	0.280408	6.6e-05	-0.621845	-0.893749	2.35425				OʼNeil et al., 2013
Nuvvuagittuq		Trond. Band	PC-287-39	3771	3757	0.000478413	0.28042	5.6e-05	1.72049	1.48476	1.99755				OʼNeil et al., 2013
Nuvvuagittuq		Trond. Band	PC-287-42	3758.4	3757	0.000987967	0.280322	6.2e-05	-3.39291	-3.33175	2.21157				OʼNeil et al., 2013
Nuvvuagittuq		Trond. Band	PC-287-45	3751.2	3757	0.000415957	0.280263	3.4e-05	-4.18642	-3.95379	1.2128				OʼNeil et al., 2013
Nuvvuagittuq		Trond. Band	PC-287-47	3669.5	3757	0.000740791	0.280325	7e-05	-4.7274	-2.58409	2.49694				OʼNeil et al., 2013
Nuvvuagittuq		Trond. Band	PC-287-49	3774.6	3757	0.000810039	0.280401	4.8e-05	0.265061	-0.0525326	1.71218				OʼNeil et al., 2013
Nuvvuagittuq		Trond. Band	PC-287-50	3767.2	3757	0.000575722	0.280366	4.2e-05	-0.548287	-0.693714	1.49816				OʼNeil et al., 2013
Nuvvuagittuq		Trond. Band	PC-287-53	3736.6	3757	0.000659408	0.280351	6.2e-05	-2.01968	-1.44569	2.21157				OʼNeil et al., 2013
Nuvvuagittuq		Trond. Band	PC-287-54	3767.1	3757	0.000363519	0.280387	3.4e-05	0.749401	0.605392	1.2128				OʼNeil et al., 2013
Nuvvuagittuq		Trond. Band	PC-287-59	3755.8	3757	0.000261747	0.280331	5.6e-05	-1.25281	-1.12843	1.99755				OʼNeil et al., 2013
Nuvvuagittuq		Trond. Band	PC-287-69	3778.7	3757	0.000683534	0.280419	7e-05	1.33264	0.917441	2.49694				OʼNeil et al., 2013
Nuvvuagittuq		Trond. Band	PC-287-70	3760.5	3757	0.000948464	0.280407	6.2e-05	-0.209611	-0.197287	2.21157				OʼNeil et al., 2013
Nuvvuagittuq		Trond. Band	PC-287-71	3767.6	3757	0.00061808	0.280346	4e-05	-1.36229	-1.51693	1.42682				OʼNeil et al., 2013
Nuvvuagittuq		Trond. Band	PC-287-78	3776.3	3757	0.000854137	0.280459	5.4e-05	2.25909	1.90212	1.92621				OʼNeil et al., 2013
Nuvvuagittuq		Trond. Band	PC-287-79	3744.3	3757	0.000478301	0.280346	4.8e-05	-1.54992	-1.15464	1.71218				OʼNeil et al., 2013
Nuvvuagittuq		Trond. Band	PC-287-84	3748.7	3757	0.000720543	0.280382	4e-05	-0.787543	-0.49833	1.42682				OʼNeil et al., 2013
Nuvvuagittuq		Trond. Band	PC-287-85	3743	3757	0.000642448	0.280348	5.4e-05	-1.9326	-1.50875	1.92621				OʼNeil et al., 2013
Nuvvuagittuq		Trond. Band	PC-287-86	3751.4	3757	0.00070696	0.280374	3e-05	-0.974466	-0.748496	1.07012				OʼNeil et al., 2013
Nuvvuagittuq		Trond. Band	PC-287-87	3760.1	3757	0.000837729	0.280334	6.8e-05	-2.53601	-2.51429	2.4256				OʼNeil et al., 2013
Nuvvuagittuq		Trond. Band	PC-287-88	3747.3	3757	0.000529175	0.280349	5.6e-05	-1.50339	-1.17949	1.99755				OʼNeil et al., 2013
Nuvvuagittuq		Trond. Band	PC-287-93	3748.9	3757	0.00028352	0.280338	4.6e-05	-1.22345	-0.935163	1.64084				OʼNeil et al., 2013
Nuvvuagittuq		Trond. Band	PC-287-97	3736.8	3757	0.00059122	0.280367	6.4e-05	-1.26872	-0.698212	2.28291				OʼNeil et al., 2013
Nuvvuagittuq		Trond. Band	PC-287-18D	3735.9	3757	0.000539695	0.280332	4.4e-05	-2.40572	-1.81317	1.5695				OʼNeil et al., 2013
Nuvvuagittuq		Trond. Band	PC-287-2D	3769.9	3757	0.000471082	0.280359	5.6e-05	-0.462477	-0.672201	1.99755				OʼNeil et al., 2013
Nuvvuagittuq		Trond. Band	PC-287-39D	3771	3757	0.000792475	0.280372	5.4e-05	-0.808048	-1.04148	1.92621				OʼNeil et al., 2013
Nuvvuagittuq		Trond. Band	PC-287-47D	3669.5	3757	0.000847447	0.280334	3.8e-05	-4.67585	-2.53948	1.35548				OʼNeil et al., 2013
Nuvvuagittuq		Trond. Band	PC-287-50D	3767.2	3757	0.000506129	0.280345	3.4e-05	-1.11672	-1.26244	1.2128				OʼNeil et al., 2013
Nuvvuagittuq		TTG	PC-286-1	3762.5	3756	0.000692518	0.280346	5.2e-05	-1.67533	-1.73337	1.85486	-1.47365	0.302962	4.57306	OʼNeil et al., 2013
Nuvvuagittuq		TTG	PC-286-2	3755.1	3756	0.000430645	0.280333	3.2e-05	-1.63516	-1.51854	1.14145				OʼNeil et al., 2013
Nuvvuagittuq		TTG	PC-286-4	3770.1	3756	0.000775238	0.280431	5.2e-05	1.32034	1.08436	1.85486				OʼNeil et al., 2013
Nuvvuagittuq		TTG	PC-286-7	3747.9	3756	0.000557105	0.280353	4.8e-05	-1.41868	-1.13279	1.71218				OʼNeil et al., 2013
Nuvvuagittuq		TTG	PC-286-10	3749.9	3756	0.000633531	0.280322	4.2e-05	-2.6748	-2.43664	1.49816				OʼNeil et al., 2013
Nuvvuagittuq		TTG	PC-286-18	3759.2	3756	0.000518701	0.280338	4.4e-05	-1.58789	-1.56835	1.5695				OʼNeil et al., 2013
Nuvvuagittuq		TTG	PC-286-20	3756.2	3756	0.000560661	0.28038	3.2e-05	-0.269118	-0.178877	1.14145				OʼNeil et al., 2013
Nuvvuagittuq		TTG	PC-286-23	3749.5	3756	0.000313342	0.280332	3.8e-05	-1.50027	-1.25026	1.35548				OʼNeil et al., 2013
Nuvvuagittuq		TTG	PC-286-37	3743.2	3756	0.00066484	0.280312	3.8e-05	-3.26977	-2.87448	1.35548				OʼNeil et al., 2013
Nuvvuagittuq		TTG	PC-286-39	3760.5	3756	0.000597523	0.280355	4.2e-05	-1.15506	-1.16618	1.49816				OʼNeil et al., 2013
Nuvvuagittuq		TTG	PC-286-40	3745.4	3756	0.000890272	0.280323	4.2e-05	-3.40749	-3.06623	1.49816				OʼNeil et al., 2013
Nuvvuagittuq		TTG	PC-286-41	3765.4	3756	0.000529134	0.280365	6e-05	-0.505484	-0.632258	2.14023				OʼNeil et al., 2013
Nuvvuagittuq		TTG	PC-286-45	3745.8	3756	0.00083899	0.280392	5.4e-05	-0.804557	-0.472016	1.9262				OʼNeil et al., 2013
Nuvvuagittuq		TTG	PC-286-46	3697.1	3756	0.00056622	0.280355	5.4e-05	-2.56716	-1.08507	1.9262				OʼNeil et al., 2013
Nuvvuagittuq		TTG	PC-286-58	3620.9	3756	0.000614343	0.280362	4.2e-05	-4.22918	-0.960063	1.49816				OʼNeil et al., 2013
Nuvvuagittuq		TTG	PC-286-56	3735.7	3756	0.000825821	0.280327	3.6e-05	-3.32517	-2.75654	1.28414				OʼNeil et al., 2013
Nuvvuagittuq		TTG	PC-286-59	3705.8	3756	0.000834304	0.280335	4.6e-05	-3.75991	-2.49315	1.64084				OʼNeil et al., 2013
Nuvvuagittuq		TTG	PC-286-60	3739.7	3756	0.000367375	0.280336	5.2e-05	-1.72947	-1.24759	1.85486				OʼNeil et al., 2013
Nuvvuagittuq		TTG	PC-286-62	3758.8	3756	0.000395732	0.280356	4.6e-05	-0.636726	-0.607635	1.64084				OʼNeil et al., 2013
Nuvvuagittuq		TTG	PC-286-66	3734.5	3756	0.000325763	0.280345	3.8e-05	-1.42462	-0.818719	1.35548				OʼNeil et al., 2013
Nuvvuagittuq		TTG	PC-286-69	3760.2	3756	0.000404761	0.28033	3.4e-05	-1.55441	-1.55849	1.21279				OʼNeil et al., 2013
Nuvvuagittuq		TTG	PC-286-70	3776.6	3756	0.000521931	0.280336	3.8e-05	-1.25689	-1.64806	1.35548				OʼNeil et al., 2013
Nuvvuagittuq		TTG	PC-286-76	3729.1	3756	0.000727092	0.280408	6.8e-05	-0.336582	0.388672	2.42559				OʼNeil et al., 2013
Nuvvuagittuq		TTG	PC-286-78	3743.3	3756	0.000311328	0.280336	4.8e-05	-1.49959	-1.10236	1.71218				OʼNeil et al., 2013
Nuvvuagittuq		TTG	PC-286-81	3747.3	3756	0.000547865	0.280372	3.8e-05	-0.731227	-0.431094	1.35548				OʼNeil et al., 2013
Nuvvuagittuq		TTG	PC-286-71	3768.5	3756	0.000528607	0.280344	3.4e-05	-1.18007	-1.37999	1.21279				OʼNeil et al., 2013
Nuvvuagittuq		TTG	PC-286-82	3754.2	3756	0.000716771	0.280332	4.8e-05	-2.43232	-2.29561	1.71218				OʼNeil et al., 2013
Nuvvuagittuq		TTG	PC-286-90	3762.4	3756	0.000474861	0.280357	6e-05	-0.720932	-0.777	2.14023				OʼNeil et al., 2013
Nuvvuagittuq		TTG	PC-286-92	3749.5	3756	0.000323133	0.280314	5.6e-05	-2.16763	-1.91772	1.99754				OʼNeil et al., 2013
Nuvvuagittuq		TTG	PC-286-96	3770.2	3756	0.000766742	0.280366	3.2e-05	-0.973944	-1.21227	1.14145				OʼNeil et al., 2013
Nuvvuagittuq		TTG	PC-286-98	3752.1	3756	0.000565678	0.280338	3.6e-05	-1.87691	-1.69008	1.28414				OʼNeil et al., 2013
Nuvvuagittuq		TTG	PC-286-101	3760.8	3756	0.000546078	0.280339	5.2e-05	-1.58541	-1.60362	1.85486				OʼNeil et al., 2013
Nuvvuagittuq		TTG	PC-286-103	3763.7	3756	0.000689518	0.280419	6.8e-05	0.964667	0.878419	2.42559				OʼNeil et al., 2013
Nuvvuagittuq		TTG	PC-286-106	3757	3756	0.000423221	0.280307	3.6e-05	-2.49843	-2.42676	1.28414				OʼNeil et al., 2013
Nuvvuagittuq		TTG	PC-286-108	3760.5	3756	0.000541201	0.280306	2.6e-05	-2.75701	-2.76814	0.927431				OʼNeil et al., 2013
Nuvvuagittuq		TTG	PC-286-111	3762.4	3756	0.000452963	0.280307	3.4e-05	-2.44774	-2.50383	1.21279				OʼNeil et al., 2013
Nuvvuagittuq		TTG	PC-286-113	3764.6	3756	0.000742297	0.280389	4.6e-05	-0.221281	-0.328484	1.64084				OʼNeil et al., 2013
Nuvvuagittuq		TTG	PC-286-116	3738.7	3756	0.000862327	0.280342	4.4e-05	-2.81405	-2.31606	1.5695				OʼNeil et al., 2013
Nuvvuagittuq		TTG	PC-286-118	3760.5	3756	0.000432256	0.28034	3.6e-05	-1.26185	-1.27302	1.28414				OʼNeil et al., 2013
Nuvvuagittuq		TTG	PC-286-119	3760.5	3756	0.000860584	0.280309	3.8e-05	-3.47767	-3.4887	1.35548				OʼNeil et al., 2013
Nuvvuagittuq		TTG	PC-286-113D	3764.6	3756	0.000653906	0.280342	5.2e-05	-1.66853	-1.77601	1.85486				OʼNeil et al., 2013
Nuvvuagittuq		TTG	PC-286-4D	3770.1	3756	0.000462056	0.280296	6e-05	-2.68165	-2.91978	2.14023				OʼNeil et al., 2013
Nuvvuagittuq		TTG	PC-286-58D	3620.9	3756	0.00067108	0.280347	3.8e-05	-4.90542	-1.64215	1.35548				OʼNeil et al., 2013
Nuvvuagittuq		TTG	PC-286-59D	3705.8	3756	0.00072152	0.28037	5e-05	-2.22373	-0.952404	1.78352				OʼNeil et al., 2013
Nuvvuagittuq		TTG	PC-286-60D	3739.7	3756	0.000483884	0.280305	3.4e-05	-3.13542	-2.65529	1.21279				OʼNeil et al., 2013
Nuvvuagittuq		TTG	PC-284-17D	3651.3	3657	0.00107022	0.280408	3.8e-05	-3.02094	-2.79815	1.35515	-4.49819	0.347142	4.58079	OʼNeil et al., 2013
Nuvvuagittuq		TTG	PC-284-83	3670.7	3657	0.00140668	0.280416	5.6e-05	-3.13659	-3.3607	1.99707				OʼNeil et al., 2013
Nuvvuagittuq		TTG	PC-284-84	3665.3	3657	0.000802318	0.280304	4.4e-05	-5.72981	-5.83201	1.56913				OʼNeil et al., 2013
Nuvvuagittuq		TTG	PC-284-87	3673.2	3657	0.00108723	0.28034	5.6e-05	-4.98193	-5.26609	1.99707				OʼNeil et al., 2013
Nuvvuagittuq		TTG	PC-284-89	3671	3657	0.000789804	0.280313	7e-05	-5.24414	-5.47951	2.49634				OʼNeil et al., 2013
Nuvvuagittuq		TTG	PC-284-90	3668.4	3657	0.00122839	0.280372	4.2e-05	-4.30827	-4.48059	1.4978				OʼNeil et al., 2013
Nuvvuagittuq		TTG	PC-284-71	3665.4	3657	0.00104722	0.280377	5.6e-05	-3.74197	-3.84575	1.99707				OʼNeil et al., 2013
Nuvvuagittuq		TTG	PC-284-80	3672.7	3657	0.000794314	0.280333	5e-05	-4.50256	-4.77761	1.7831				OʼNeil et al., 2013
Nuvvuagittuq		TTG	PC-284-81	3667.3	3657	0.00119936	0.28037	4.6e-05	-4.33166	-4.47877	1.64045				OʼNeil et al., 2013
Nuvvuagittuq		TTG	PC-284-63	3521.7	3657	0.00101677	0.280373	4.6e-05	-7.13536	-3.91166	1.64045				OʼNeil et al., 2013
Nuvvuagittuq		TTG	PC-284-64	3661.5	3657	0.000827956	0.280369	3.6e-05	-3.56503	-3.57852	1.28383				OʼNeil et al., 2013
Nuvvuagittuq		TTG	PC-284-60	3671.9	3657	0.000961323	0.280357	6.2e-05	-4.08748	-4.34255	2.21104				OʼNeil et al., 2013
Nuvvuagittuq		TTG	PC-284-61	3659.3	3657	0.0017984	0.280367	6e-05	-6.13198	-6.09528	2.13972				OʼNeil et al., 2013
Nuvvuagittuq		TTG	PC-284-47	3659.3	3657	0.00118367	0.280357	4.8e-05	-4.94026	-4.90285	1.71177				OʼNeil et al., 2013
Nuvvuagittuq		TTG	PC-284-41	3651.8	3657	0.000967541	0.280395	4.8e-05	-3.2149	-3.00302	1.71177				OʼNeil et al., 2013
Nuvvuagittuq		TTG	PC-284-3	3648	3657	0.00105618	0.280342	6.8e-05	-5.41576	-5.11652	2.42501				OʼNeil et al., 2013
Nuvvuagittuq		TTG	PC-284-4	3655.2	3657	0.00134593	0.280412	4e-05	-3.48162	-3.35026	1.42648				OʼNeil et al., 2013
Nuvvuagittuq		TTG	PC-284-5	3645.4	3657	0.00156595	0.280356	6.4e-05	-6.2556	-5.90181	2.28237				OʼNeil et al., 2013
Nuvvuagittuq		TTG	PC-284-7	3651.8	3657	0.00101616	0.280359	4.6e-05	-4.62094	-4.40941	1.64045				OʼNeil et al., 2013
Nuvvuagittuq		TTG	PC-284-8	3653.9	3657	0.00209506	0.280386	6e-05	-6.32265	-6.16523	2.13972				OʼNeil et al., 2013
Nuvvuagittuq		TTG	PC-284-9	3521.5	3657	0.000675966	0.280357	6e-05	-6.88567	-3.62347	2.13972				OʼNeil et al., 2013
Nuvvuagittuq		TTG	PC-284-12	3669.8	3657	0.00120187	0.2803	5.2e-05	-6.77679	-6.98149	1.85442				OʼNeil et al., 2013
Nuvvuagittuq		TTG	PC-284-16	3643.6	3657	0.00128717	0.280361	6.4e-05	-5.41928	-5.021	2.28237				OʼNeil et al., 2013
Nuvvuagittuq		TTG	PC-284-17	3651.3	3657	0.00102497	0.280328	4.6e-05	-5.7602	-5.53716	1.64045				OʼNeil et al., 2013
Nuvvuagittuq		TTG	PC-284-19	3631.3	3657	0.00085834	0.280367	5.2e-05	-4.41654	-3.72641	1.85442				OʼNeil et al., 2013
Nuvvuagittuq		TTG	PC-284-20	3621.1	3657	0.000975213	0.280347	4e-05	-5.65843	-4.73418	1.42648				OʼNeil et al., 2013
Nuvvuagittuq		TTG	PC-284-23	3480	3657	0.00106817	0.280419	4.4e-05	-6.58196	-2.4007	1.56913				OʼNeil et al., 2013
Nuvvuagittuq		TTG	PC-284-24	3646.7	3657	0.000760563	0.280373	3.8e-05	-3.59845	-3.26604	1.35515				OʼNeil et al., 2013
Nuvvuagittuq		TTG	PC-284-26	3649.9	3657	0.00100468	0.280391	3.8e-05	-3.49498	-3.23927	1.35515				OʼNeil et al., 2013
Nuvvuagittuq		TTG	PC-284-27	3655.9	3657	0.00119204	0.280363	3.6e-05	-4.82578	-4.70996	1.28383				OʼNeil et al., 2013
Nuvvuagittuq		TTG	PC-284-29	3643.9	3657	0.0010133	0.280361	4.8e-05	-4.72561	-4.33089	1.71177				OʼNeil et al., 2013
Nuvvuagittuq		TTG	PC-284-31	3636.2	3657	0.00123418	0.280364	3.6e-05	-5.34981	-4.78049	1.28383				OʼNeil et al., 2013
Nuvvuagittuq		TTG	PC-284-32	3657.2	3657	0.000980731	0.280334	3.6e-05	-5.2981	-5.2117	1.28383				OʼNeil et al., 2013
Nuvvuagittuq		TTG	PC-284-56	3672.4	3657	0.000996434	0.280354	3.4e-05	-4.27161	-4.53801	1.21251				OʼNeil et al., 2013
Nuvvuagittuq		TTG	PC-284-57	3557	3657	0.00100338	0.280349	4.2e-05	-7.14193	-4.73383	1.4978				OʼNeil et al., 2013
Nuvvuagittuq		TTG	PC-284-58	3664.9	3657	0.00106827	0.280361	3.6e-05	-4.37728	-4.4694	1.28383				OʼNeil et al., 2013
Nuvvuagittuq		TTG	PC-284-100	3660.6	3657	0.00183411	0.280379	5e-05	-5.76458	-5.7573	1.7831				OʼNeil et al., 2013
Nuvvuagittuq		TTG	PC-284-24D	3646.7	3657	0.0007775	0.280388	5.2e-05	-3.10603	-2.77378	1.85442				OʼNeil et al., 2013
Nuvvuagittuq		TTG	PC-285-4	3413.2	3508	0.00134865	0.28039	6.2e-05	-9.81192	-7.55983	2.21025	-6.24852	0.43721	6.74056	OʼNeil et al., 2013
Nuvvuagittuq		TTG	PC-285-10	3442.9	3508	0.00114573	0.280508	6.4e-05	-4.44815	-2.86346	2.28155				OʼNeil et al., 2013
Nuvvuagittuq		TTG	PC-285-11	3398.6	3508	0.000978274	0.280403	3.8e-05	-8.81801	-6.20267	1.35467				OʼNeil et al., 2013
Nuvvuagittuq		TTG	PC-285-17	3476.9	3508	0.001856	0.280367	4e-05	-10.3885	-9.60402	1.42597				OʼNeil et al., 2013
Nuvvuagittuq		TTG	PC-285-18	3360.2	3508	0.00152785	0.280414	3.2e-05	-10.5785	-7.13663	1.14078				OʼNeil et al., 2013
Nuvvuagittuq		TTG	PC-285-20	3528.2	3508	0.000679752	0.280455	2.2e-05	-3.24446	-3.62853	0.784284				OʼNeil et al., 2013
Nuvvuagittuq		TTG	PC-285-21	3444	3508	0.000857431	0.280367	4.2e-05	-8.76705	-7.19449	1.49727				OʼNeil et al., 2013
Nuvvuagittuq		TTG	PC-285-22	3485.1	3508	0.000874279	0.280375	4.8e-05	-7.56868	-6.94994	1.71116				OʼNeil et al., 2013
Nuvvuagittuq		TTG	PC-285-30	3481.4	3508	0.000830018	0.280401	4.2e-05	-6.62184	-5.91623	1.49727				OʼNeil et al., 2013
Nuvvuagittuq		TTG	PC-285-31	3509.3	3508	0.00110461	0.280368	6.6e-05	-7.81201	-7.75527	2.35285				OʼNeil et al., 2013
Nuvvuagittuq		TTG	PC-285-37	3341	3508	0.00119219	0.280379	3.8e-05	-11.4919	-7.57446	1.35467				OʼNeil et al., 2013
Nuvvuagittuq		TTG	PC-285-39	3467.3	3508	0.000615412	0.280419	4.2e-05	-5.7967	-4.75669	1.49727				OʼNeil et al., 2013
Nuvvuagittuq		TTG	PC-285-42	3483.5	3508	0.00119178	0.280455	3.4e-05	-5.51367	-4.86404	1.21207				OʼNeil et al., 2013
Nuvvuagittuq		TTG	PC-285-45	3446.1	3508	0.000919201	0.280403	3.2e-05	-7.58129	-6.06013	1.14078				OʼNeil et al., 2013
Nuvvuagittuq		TTG	PC-285-47	3434.9	3508	0.00147339	0.280402	6.2e-05	-9.18296	-7.43303	2.21025				OʼNeil et al., 2013
Nuvvuagittuq		TTG	PC-285-48	3470	3508	0.00114479	0.280394	4.8e-05	-7.88629	-6.92531	1.71116				OʼNeil et al., 2013
Nuvvuagittuq		TTG	PC-285-52	3398.1	3508	0.00143129	0.280446	7e-05	-8.35333	-5.76283	2.49545				OʼNeil et al., 2013
Nuvvuagittuq		TTG	PC-285-54	3525.2	3508	0.000964895	0.280385	6.6e-05	-6.50095	-6.81209	2.35285				OʼNeil et al., 2013
Nuvvuagittuq		TTG	PC-285-55	3511	3508	0.000946741	0.28043	4.8e-05	-5.18168	-5.16403	1.71116				OʼNeil et al., 2013
Nuvvuagittuq		TTG	PC-285-56	3481.8	3508	0.000567554	0.280385	3.2e-05	-6.55521	-5.85332	1.14078				OʼNeil et al., 2013
Nuvvuagittuq		TTG	PC-285-58	3424.7	3508	0.00111686	0.280407	7e-05	-8.39863	-6.39448	2.49545				OʼNeil et al., 2013
Nuvvuagittuq		TTG	PC-285-61	3507.9	3508	0.000887326	0.280391	4e-05	-6.50064	-6.41102	1.42597				OʼNeil et al., 2013
Nuvvuagittuq		TTG	PC-285-65	3405.7	3508	0.0014433	0.280428	6.6e-05	-8.84994	-6.43352	2.35285				OʼNeil et al., 2013
Nuvvuagittuq		TTG	PC-285-68	3458.9	3508	0.000964939	0.280414	5.2e-05	-7.00148	-5.77834	1.85376				OʼNeil et al., 2013
Nuvvuagittuq		TTG	PC-285-70	3441.7	3508	0.00147016	0.280418	3.6e-05	-8.45033	-6.85483	1.28337				OʼNeil et al., 2013
Nuvvuagittuq		TTG	PC-285-74	3502.9	3508	0.00120907	0.280422	4.8e-05	-6.28584	-6.08223	1.71116				OʼNeil et al., 2013
Nuvvuagittuq		TTG	PC-285-81	3535.3	3508	0.00120773	0.280434	3.8e-05	-5.11012	-5.65119	1.35467				OʼNeil et al., 2013
Nuvvuagittuq		TTG	PC-285-82	3442.7	3508	0.000645254	0.280416	3.4e-05	-6.54911	-4.93565	1.21207				OʼNeil et al., 2013
Nuvvuagittuq		TTG	PC-285-96	3453.9	3508	0.00124119	0.280387	5.6e-05	-8.73468	-7.4075	1.99636				OʼNeil et al., 2013
Nuvvuagittuq		TTG	PC-285-99	3423.3	3508	0.00116076	0.280401	6e-05	-8.74783	-6.71432	2.13896				OʼNeil et al., 2013
Nuvvuagittuq		TTG	PC-285-102	3476.1	3508	0.00102087	0.280434	4.4e-05	-6.02426	-5.2003	1.56857				OʼNeil et al., 2013
Nuvvuagittuq		TTG	PC-285-104	3453	3508	0.000977671	0.280404	4.8e-05	-7.52454	-6.16557	1.71116				OʼNeil et al., 2013
Nuvvuagittuq		TTG	PC-285-10D	3442.9	3508	0.00124702	0.280413	3.2e-05	-8.0738	-6.49465	1.14078				OʼNeil et al., 2013
Nuvvuagittuq		TTG	PC-285-18D	3360.2	3508	0.00138678	0.280424	3.8e-05	-9.89701	-6.43972	1.35467				OʼNeil et al., 2013
Nuvvuagittuq		TTG	PC-285-37D	3341	3508	0.00172154	0.2804	5.2e-05	-11.9563	-8.10311	1.85376				OʼNeil et al., 2013
Nuvvuagittuq		TTG	PC-285-39D	3467.3	3508	6.7919e-05	0.280407	5e-05	-4.92077	-3.8634	1.78246				OʼNeil et al., 2013
Nuvvuagittuq		Mylonitic tonalite	POR23-1	3667	3667	0.000409	0.280406	5.8e-05	-0.97	-0.964907	2.06844	-2.00727	0.633709	3.2669	Augland and David, 2015
Nuvvuagittuq		Mylonitic tonalite	POR23-2	3667	3667	0.000769	0.28041	7.9e-05	-1.75	-1.73201	2.81736				Augland and David, 2015
Nuvvuagittuq		Mylonitic tonalite	POR23-3	3667	3667	0.000505	0.280439	2.6e-05	-0.02	-0.0306353	0.927233				Augland and David, 2015
Nuvvuagittuq		Mylonitic tonalite	POR23-4	3667	3667	0.000529	0.280404	4.9e-05	-1.35	-1.33948	1.74748				Augland and David, 2015
Nuvvuagittuq		Mylonitic tonalite	POR23-5	3667	3667	0.00067	0.280388	0.00012	-2.29	-2.26641	4.27954				Augland and David, 2015
Nuvvuagittuq		Mylonitic tonalite	POR23-6	3667	3667	0.000649	0.280366	3.9e-05	-3.01	-2.99792	1.39085				Augland and David, 2015
Nuvvuagittuq		Mylonitic tonalite	POR23-7	3667	3667	0.000553	0.280374	1.9e-05	-2.45	-2.47002	0.677594				Augland and David, 2015
Nuvvuagittuq		Mylonitic tonalite	POR23-8	3667	3667	0.0005	0.280377	0.0001	-2.25	-2.22909	3.56628				Augland and David, 2015
Nuvvuagittuq		Mylonitic tonalite	POR23-9	3667	3667	0.000577	0.280368	2.3e-05	-2.75	-2.74465	0.820245				Augland and David, 2015
Nuvvuagittuq		Mylonitic tonalite	POR23-10	3667	3667	0.000697	0.280361	8.5e-05	-3.28	-3.29754	3.03134				Augland and David, 2015
Acasta		dark foliated gneiss	AG09017_1	3801	3974	0.0015	0.280266	4.2e-05	-5.7	-1.66936	1.49894	-0.991005	0.779983	7.14789	Guitreau et al., 2012
Acasta		dark foliated gneiss	AG09017_1	3729	3974	0.0026	0.280444	9.7e-05	-3.8	1.65979	3.46185				Guitreau et al., 2012
Acasta		dark foliated gneiss	AG09017_1	3493	3974	0.0034	0.280406	5e-05	-12.3	-1.89531	1.78446				Guitreau et al., 2012
Acasta		dark foliated gneiss	AG09017_10	3842	3974	0.0022	0.280283	4.9e-05	-5.9	-2.9867	1.74877				Guitreau et al., 2012
Acasta		dark foliated gneiss	AG09017_10	3888	3974	0.0014	0.280224	8e-05	-4.9	-2.89344	2.85513				Guitreau et al., 2012
Acasta		dark foliated gneiss	AG09017_11	3687	3974	0.003	0.280461	9.7e-05	-5.1	1.16705	3.46185				Guitreau et al., 2012
Acasta		dark foliated gneiss	AG09017_11	3850	3974	0.0029	0.280367	4.3e-05	-4.6	-1.91287	1.53463				Guitreau et al., 2012
Acasta		dark foliated gneiss	AG09017_14	3535	3974	0.0022	0.280307	6.5e-05	-11.9	-2.13016	2.31979				Guitreau et al., 2012
Acasta		dark foliated gneiss	AG09017_14	3655	3974	0.00083	0.280279	7.5e-05	-6.9	0.636188	2.67669				Guitreau et al., 2012
Acasta		dark foliated gneiss	AG09017_15	3408	3974	0.0019	0.280363	7.4e-05	-12.1	0.693023	2.641				Guitreau et al., 2012
Acasta		dark foliated gneiss	AG09017_16	3963	3974	0.0021	0.280324	7.3e-05	-1.6	-1.24858	2.60531				Guitreau et al., 2012
Acasta		dark foliated gneiss	AG09017_2	3919	3974	0.0025	0.280381	8.8e-05	-1.5	-0.313761	3.14064				Guitreau et al., 2012
Acasta		dark foliated gneiss	AG09017_2	3887	3974	0.0016	0.280312	6.4e-05	-2.3	-0.302529	2.28411				Guitreau et al., 2012
Acasta		dark foliated gneiss	AG09017_3	3900	3974	0.00067	0.280193	6.7e-05	-3.8	-1.99329	2.39117				Guitreau et al., 2012
Acasta		dark foliated gneiss	AG09017_3	3264	3974	0.0014	0.280232	4.5e-05	-18.8	-2.60793	1.60601				Guitreau et al., 2012
Acasta		dark foliated gneiss	AG09017_3	3763	3974	0.0015	0.280159	8.1e-05	-10.4	-5.4881	2.89082				Guitreau et al., 2012
Acasta		dark foliated gneiss	AG09017_4	3885	3974	0.00075	0.28022	4.8e-05	-3.3	-1.24958	1.71308				Guitreau et al., 2012
Acasta		dark foliated gneiss	AG09017_4	3766	3974	0.0007	0.28027	0.0001	-4.4	0.67231	3.56891				Guitreau et al., 2012
Acasta		dark foliated gneiss	AG09017_5	3974	3974	0.0015	0.280358	4.7e-05	1.6	1.61404	1.67739				Guitreau et al., 2012
Acasta		dark foliated gneiss	AG09017_8	3253	3974	0.00054	0.28022	0.00011	-17.7	-0.672363	3.92581				Guitreau et al., 2012
Acasta		dark foliated gneiss	AG09017_8a	3910	3974	0.0023	0.28031	9.2e-05	-3.8	-2.29796	3.2834				Guitreau et al., 2012
Acasta		dark foliated gneiss	AG09017_8b	3504	3974	0.002	0.280391	7e-05	-9.1	1.41745	2.49824				Guitreau et al., 2012
Acasta		finely foliated melanocratic garnet-bearing tonalitic gneiss	AG09008gt_1	3430	3982	0.00099	0.280223	6e-05	-14.4	-1.61499	2.14139	-2.03291	0.382138	3.74936	Guitreau et al., 2012
Acasta		finely foliated melanocratic garnet-bearing tonalitic gneiss	AG09008gt_1	3757	3982	0.0011	0.280201	4.4e-05	-7.9	-2.70315	1.57035				Guitreau et al., 2012
Acasta		finely foliated melanocratic garnet-bearing tonalitic gneiss	AG09008gt_1	3690	3982	0.00088	0.280238	4e-05	-7.6	-0.776652	1.42759				Guitreau et al., 2012
Acasta		finely foliated melanocratic garnet-bearing tonalitic gneiss	AG09008gt_11	3906	3982	0.0013	0.280262	8.1e-05	-2.8	-1.07696	2.89088				Guitreau et al., 2012
Acasta		finely foliated melanocratic garnet-bearing tonalitic gneiss	AG09008gt_12	3812	3982	0.00092	0.2802	4.1e-05	-6.2	-2.24304	1.46328				Guitreau et al., 2012
Acasta		finely foliated melanocratic garnet-bearing tonalitic gneiss	AG09008gt_13	3551	3982	0.0012	0.280226	6.6e-05	-12.1	-2.08635	2.35553				Guitreau et al., 2012
Acasta		finely foliated melanocratic garnet-bearing tonalitic gneiss	AG09008gt_13	3757	3982	0.0012	0.280226	6.6e-05	-7.4	-2.08635	2.35553				Guitreau et al., 2012
Acasta		finely foliated melanocratic garnet-bearing tonalitic gneiss	AG09008gt_15	3899	3982	0.0016	0.280238	4.3e-05	-4.6	-2.75985	1.53466				Guitreau et al., 2012
Acasta		finely foliated melanocratic garnet-bearing tonalitic gneiss	AG09008gt_2	3906	3982	0.0004	0.28015	4.1e-05	-4.4	-2.59523	1.46328				Guitreau et al., 2012
Acasta		finely foliated melanocratic garnet-bearing tonalitic gneiss	AG09008gt_2	3668	3982	0.0013	0.28022	3.9e-05	-9.8	-2.57593	1.3919				Guitreau et al., 2012
Acasta		finely foliated melanocratic garnet-bearing tonalitic gneiss	AG09008gt_2	3257	3982	0.0013	0.280249	4.3e-05	-18.3	-1.54093	1.53466				Guitreau et al., 2012
Acasta		finely foliated melanocratic garnet-bearing tonalitic gneiss	AG09008gt_3	3374	3982	0.0018	0.280312	5e-05	-14.5	-0.669691	1.78449				Guitreau et al., 2012
Acasta		finely foliated melanocratic garnet-bearing tonalitic gneiss	AG09008gt_4	3776	3982	0.0014	0.28026	0.00012	-6.3	-1.42379	4.28278				Guitreau et al., 2012
Acasta		finely foliated melanocratic garnet-bearing tonalitic gneiss	AG09008gt_4	3107	3982	0.00094	0.280204	5e-05	-22.5	-2.15537	1.78449				Guitreau et al., 2012
Acasta		finely foliated melanocratic garnet-bearing tonalitic gneiss	AG09008gt_5	3712	3982	0.0011	0.280176	6.5e-05	-9.8	-3.5954	2.31984				Guitreau et al., 2012
Acasta		finely foliated melanocratic garnet-bearing tonalitic gneiss	AG09008gt_5	3330	3982	0.001	0.280221	7e-05	-16.9	-1.71391	2.49829				Guitreau et al., 2012
Acasta		finely foliated melanocratic garnet-bearing tonalitic gneiss	AG09008gt_6	3896	3982	0.001	0.280204	3.4e-05	-4.4	-2.32064	1.21345				Guitreau et al., 2012
Acasta		finely foliated melanocratic garnet-bearing tonalitic gneiss	AG09008gt_6	2795	3982	0.0013	0.280229	6.3e-05	-29.3	-2.25473	2.24846				Guitreau et al., 2012
Acasta		finely foliated melanocratic garnet-bearing tonalitic gneiss	AG09008gt_7	3982	3982	0.00078	0.28014	0.00011	-4.2	-3.99881	3.92588				Guitreau et al., 2012
Acasta		finely foliated melanocratic garnet-bearing tonalitic gneiss	AG09008gt_7	3677	3982	0.00087	0.280252	5.1e-05	-7.4	-0.24945	1.82018				Guitreau et al., 2012
Acasta		finely foliated melanocratic garnet-bearing tonalitic gneiss	AG09008gt_8	3920	3982	0.0015	0.280259	6.1e-05	-3	-1.73492	2.17708				Guitreau et al., 2012
Acasta		finely foliated melanocratic garnet-bearing tonalitic gneiss	AG09008gt_8	3739	3982	0.00094	0.280193	4.2e-05	-8.3	-2.54796	1.49897				Guitreau et al., 2012
Acasta		finely foliated melanocratic gneiss	AG09014_1	3840	3600	0.0011	0.280281	3.9e-05	-3.1	-8.71919	1.39063	-4.6011	2.34713	6.63904	Guitreau et al., 2012
Acasta		finely foliated melanocratic gneiss	AG09014_2	3513	3600	0.0015	0.280495	5.3e-05	-4	-2.08015	1.88983				Guitreau et al., 2012
Acasta		finely foliated melanocratic gneiss	AG09014_3	4205	3600	0.0014	0.280427	7.8e-05	9.8	-4.25694	2.78125				Guitreau et al., 2012
Acasta		finely foliated melanocratic gneiss	AG09014_4	3545	3600	0.00055	0.280412	7.4e-05	-4	-2.68468	2.63863				Guitreau et al., 2012
Acasta		finely foliated melanocratic gneiss	AG09014_8	3814	3600	0.00044	0.280332	7.6e-05	-0.2	-5.26456	2.70994				Guitreau et al., 2012
Acasta		finely foliated tonalitic gneiss	AG09001_1	3763	3763	0.0014	0.280332	4.8e-05	-4	-3.90319	1.71221	-4.71267	2.63198	8.64103	Guitreau et al., 2012
Acasta		finely foliated tonalitic gneiss	AG09001_2	3592	3763	0.001	0.280407	6.4e-05	-4.2	-0.189379	2.28295				Guitreau et al., 2012
Acasta		finely foliated tonalitic gneiss	AG09001_2	3414	3763	0.0014	0.280263	4.9e-05	-14.3	-6.36449	1.74788				Guitreau et al., 2012
Acasta		finely foliated tonalitic gneiss	AG09001_5	3642	3763	0.00094	0.280167	3.7e-05	-11.4	-8.59465	1.31983				Guitreau et al., 2012
Acasta		finely foliated tonalitic gneiss	AG09001_6	3444	3763	0.0011	0.280206	9e-05	-15	-7.61888	3.21039				Guitreau et al., 2012
Acasta		finely foliated tonalitic gneiss	AG09001_8	3439	3763	0.0015	0.28045	0.00011	-7.2	0.0463718	3.92381				Guitreau et al., 2012
Acasta		finely foliated tonalitic gneiss	AG09001_9	3499	3763	0.0014	0.280263	4.9e-05	-12.3	-6.36449	1.74788				Guitreau et al., 2012
Acasta		finely foliated tonalitic gneiss	AG09009_1	3604	3600	0.0008	0.280394	8.2e-05	-3.8	-3.94625	2.92388	-4.55929	1.72195	3.73348	Guitreau et al., 2012
Acasta		finely foliated tonalitic gneiss	AG09009_3	3512	3600	0.00089	0.28035	0.0001	-7.7	-5.73826	3.56571				Guitreau et al., 2012
Acasta		finely foliated tonalitic gneiss	AG09009_4	3602	3600	0.00078	0.280331	7.1e-05	-6.1	-6.14306	2.53165				Guitreau et al., 2012
Acasta		finely foliated tonalitic gneiss	AG09009_5	3583	3600	0.001	0.280451	7.6e-05	-2.9	-2.40958	2.70994				Guitreau et al., 2012
Acasta		finely foliated tonalitic gneiss	AG09032_1	3596	3618	0.0011	0.280436	4e-05	-3.2	-2.77586	1.42635	-2.97657	0.755561	2.3621	Guitreau et al., 2012
Acasta		finely foliated tonalitic gneiss	AG09032_2	3618	3618	0.00078	0.280431	3.9e-05	-2.1	-2.15675	1.39069				Guitreau et al., 2012
Acasta		finely foliated tonalitic gneiss	AG09032_2	3961	3618	0.0023	0.280508	9.2e-05	4.4	-3.1987	3.28059				Guitreau et al., 2012
Acasta		finely foliated tonalitic gneiss	AG09032_3	3593	3618	0.00055	0.280368	4.9e-05	-4.4	-3.83011	1.74727				Guitreau et al., 2012
Acasta		finely foliated tonalitic gneiss	AG09032_4	3594	3618	0.00081	0.280444	3e-05	-2.3	-1.76795	1.06976				Guitreau et al., 2012
Acasta		finely foliated tonalitic gneiss	AG09032_5	3594	3618	0.0013	0.280412	5.1e-05	-4.6	-4.13005	1.81859				Guitreau et al., 2012
Acasta		foliated leucocratic tonalitic gneiss	AG09016_1	3688	3975	0.0016	0.280299	3.7e-05	-7.2	-0.743525	1.3205	-2.31115	0.531083	5.55509	Guitreau et al., 2012
Acasta		foliated leucocratic tonalitic gneiss	AG09016_1	3847	3975	0.00057	0.280177	3.4e-05	-5.3	-2.26576	1.21343				Guitreau et al., 2012
Acasta		foliated leucocratic tonalitic gneiss	AG09016_1	3890	3975	0.001	0.28025	3.6e-05	-2.9	-0.842674	1.28481				Guitreau et al., 2012
Acasta		foliated leucocratic tonalitic gneiss	AG09016_12	3939	3975	0.00045	0.28013	4.5e-05	-4.4	-3.61323	1.60602				Guitreau et al., 2012
Acasta		foliated leucocratic tonalitic gneiss	AG09016_13	3358	3975	0.0007	0.280165	3.7e-05	-17.5	-3.05145	1.3205				Guitreau et al., 2012
Acasta		foliated leucocratic tonalitic gneiss	AG09016_13	3871	3975	0.0006	0.280218	8.3e-05	-3.3	-0.884981	2.96221				Guitreau et al., 2012
Acasta		foliated leucocratic tonalitic gneiss	AG09016_14	3677	3975	0.0006	0.280187	2.7e-05	-9	-1.99135	0.963609				Guitreau et al., 2012
Acasta		foliated leucocratic tonalitic gneiss	AG09016_14	3914	3975	0.00063	0.280103	3.8e-05	-6.5	-5.07172	1.35619				Guitreau et al., 2012
Acasta		foliated leucocratic tonalitic gneiss	AG09016_15	3943	3975	0.00051	0.280205	4.9e-05	-1.9	-1.1015	1.74877				Guitreau et al., 2012
Acasta		foliated leucocratic tonalitic gneiss	AG09016_15	3975	3975	0.00036	0.280164	3.2e-05	-2.1	-2.15235	1.14206				Guitreau et al., 2012
Acasta		foliated leucocratic tonalitic gneiss	AG09016_16	3799	3975	0.00029	0.280165	3.7e-05	-6.1	-1.9242	1.3205				Guitreau et al., 2012
Acasta		foliated leucocratic tonalitic gneiss	AG09016_18	3940	3975	0.00063	0.280233	4.5e-05	-1.2	-0.432123	1.60602				Guitreau et al., 2012
Acasta		foliated leucocratic tonalitic gneiss	AG09016_2	3934	3975	0.00041	0.28014	3.6e-05	-4.1	-3.14636	1.28481				Guitreau et al., 2012
Acasta		foliated leucocratic tonalitic gneiss	AG09016_2	3962	3975	0.00031	0.280234	9.1e-05	0.2	0.483365	3.24772				Guitreau et al., 2012
Acasta		foliated leucocratic tonalitic gneiss	AG09016_2	3728	3975	0.00077	0.280183	3.4e-05	-8.4	-2.6015	1.21343				Guitreau et al., 2012
Acasta		foliated leucocratic tonalitic gneiss	AG09016_21	3929	3975	0.00084	0.280192	3.9e-05	-3.5	-2.47275	1.39188				Guitreau et al., 2012
Acasta		foliated leucocratic tonalitic gneiss	AG09016_3	3959	3975	0.00047	0.280129	4.3e-05	-4.1	-3.7039	1.53464				Guitreau et al., 2012
Acasta		foliated leucocratic tonalitic gneiss	AG09016_3	3143	3975	0.00077	0.280182	3.9e-05	-22	-2.63719	1.39188				Guitreau et al., 2012
Acasta		foliated leucocratic tonalitic gneiss	AG09016_4	3964	3975	0.00038	0.280158	3.4e-05	-2.7	-2.42147	1.21343				Guitreau et al., 2012
Acasta		foliated leucocratic tonalitic gneiss	AG09016_4	3497	3975	0.00064	0.280115	3.8e-05	-15.9	-4.67095	1.35619				Guitreau et al., 2012
Acasta		foliated leucocratic tonalitic gneiss	AG09016_5	3476	3975	0.00076	0.280207	2.6e-05	-13.4	-1.71746	0.92792				Guitreau et al., 2012
Acasta		foliated leucocratic tonalitic gneiss	AG09016_5	3065	3975	0.00082	0.280126	4.3e-05	-25.9	-4.77325	1.53464				Guitreau et al., 2012
Acasta		foliated leucocratic tonalitic gneiss	AG09016_6	3948	3975	0.00025	0.280142	4.8e-05	-3.3	-2.63508	1.71308				Guitreau et al., 2012
Acasta		foliated leucocratic tonalitic gneiss	AG09016_7	3610	3975	0.0007	0.28021	2.9e-05	-10	-1.44543	1.03499				Guitreau et al., 2012
Acasta		foliated leucocratic tonalitic gneiss	AG09016_8	3952	3975	0.0007	0.280177	3.3e-05	-3.2	-2.62318	1.17774				Guitreau et al., 2012
Acasta		foliated leucocratic tonalitic gneiss	AG09016_9	3867	3975	0.00032	0.280175	5e-05	-4.2	-1.64979	1.78446				Guitreau et al., 2012
Acasta		melanocratic tonalitic gneiss	AG09008_1	3736	3770	0.0045	0.280654	7.6e-05	-1	-0.31982	2.71104	-3.5256	1.47813	6.80841	Guitreau et al., 2012
Acasta		melanocratic tonalitic gneiss	AG09008_1	3555	3770	0.0014	0.28033	3.7e-05	-8.7	-3.81355	1.31985				Guitreau et al., 2012
Acasta		melanocratic tonalitic gneiss	AG09008_2	3526	3770	0.0032	0.28043	6.6e-05	-10.1	-4.92864	2.35433				Guitreau et al., 2012
Acasta		melanocratic tonalitic gneiss	AG09008_3	3517	3770	0.0026	0.280428	6.4e-05	-9	-3.43923	2.28298				Guitreau et al., 2012
Acasta		melanocratic tonalitic gneiss	AG09008_3	3458	3770	0.0013	0.280394	6.2e-05	-8.5	-1.27044	2.21164				Guitreau et al., 2012
Acasta		melanocratic tonalitic gneiss	AG09008_4	3659	3770	0.003	0.280459	7.4e-05	-5.8	-3.37391	2.6397				Guitreau et al., 2012
Acasta		melanocratic tonalitic gneiss	AG09008_5	3635	3770	0.0024	0.28031	0.0001	-10.2	-7.12823	3.56716				Guitreau et al., 2012
Acasta		melanocratic tonalitic gneiss	AG09008_6	3683	3770	0.0015	0.280334	7e-05	-5.8	-3.93099	2.49701				Guitreau et al., 2012
Acasta		TTG	Acasta Big	3997	3997	0.0018	0.28025	5e-05	-2.7	-2.54014	1.78456	-2.08948	0.726455	0	Guitreau et al., 2012
Acasta		leucocratic gneiss	AGOL2	3601	3601	0.000742	0.280415	1.8e-05	-0.71	-3.03028	0.641829	-2.01437	0.840975	2.79253	Amelin et al., 2000
Acasta		leucocratic gneiss	AGOL3	3601	3601	0.000652	0.280436	2.4e-05	0.27	-2.05831	0.855772				Amelin et al., 2000
Acasta		leucocratic gneiss	AGOL4	3601	3601	0.000632	0.280443	3.1e-05	0.57	-1.75911	1.10537				Amelin et al., 2000
Acasta		leucocratic gneiss	AGOL5	3601	3601	0.000372	0.280461	4.5e-05	1.88	-0.472567	1.60457				Amelin et al., 2000
Acasta		leucocratic gneiss	AGOL6	3601	3601	0.000571	0.280446	2.2e-05	0.83	-1.50088	0.784458				Amelin et al., 2000
Acasta		leucocratic gneiss	AGOL7	3601	3601	0.000621	0.2804	4.5e-05	-0.94	-3.2651	1.60457				Amelin et al., 2000
Acasta		banded gneiss-tonalitic portion	SAB95-88-22	3571	3571	0.000581	0.280436	1.6e-05	-0.27	-2.58717	0.570474	-3.42895	0.594473	1.38417	Amelin et al., 2000
Acasta		banded gneiss-tonalitic portion	SAB95-88-23	3571	3571	0.000854	0.280416	2e-05	-1.68	-3.97133	0.713093				Amelin et al., 2000
Acasta		banded gneiss-tonalitic portion	SAB95-88-24	3571	3571	0.000596	0.280407	2e-05	-1.34	-3.65802	0.713093				Amelin et al., 2000
Acasta		banded gneiss-tonalitic portion	SAB95-88-26	3571	3571	0.000807	0.280426	2.4e-05	-1.2	-3.49925	0.855711				Amelin et al., 2000
Acasta		tonalitic gneiss	AT10	3597	3597	0.000477	0.280324	3.7e-05	-3.37	-5.71225	1.3193	-4.28483	1.37386	2.81148	Amelin et al., 2000
Acasta		tonalitic gneiss	AT11	3597	3597	0.001199	0.280453	6.6e-05	-0.62	-2.90077	2.35335				Amelin et al., 2000
Acasta		tonalitic gneiss	AT12	3597	3597	0.001016	0.280428	2.2e-05	-1.05	-3.33893	0.784451				Amelin et al., 2000
Acasta		tonalitic gneiss	AT9	3597	3597	0.000625	0.280349	5.6e-05	-2.86	-5.18739	1.99678				Amelin et al., 2000
Australia	Meeberrie Gneiss	biotite tonalitic gneiss	88-28-2.1	3731	3731	0.000309	0.280536	3.9e-05	5.4	5.44486	1.39106	0.488894	1.02005	9.17422	Hiess and Bennett, 2016
Australia	Meeberrie Gneiss	biotite tonalitic gneiss	88-28-2.2	3731	3731	0.000422	0.280517	4.9e-05	4.5	4.4764	1.74775				Hiess and Bennett, 2016
Australia	Meeberrie Gneiss	biotite tonalitic gneiss	88-28-3.1	3731	3731	0.00096	0.28042	5.6e-05	-0.4	-0.367785	1.99742				Hiess and Bennett, 2016
Australia	Meeberrie Gneiss	biotite tonalitic gneiss	88-28-3.2	3731	3731	0.001461	0.28045	4.4e-05	-0.6	-0.586886	1.5694				Hiess and Bennett, 2016
Australia	Meeberrie Gneiss	biotite tonalitic gneiss	88-28-6.1	3731	3731	0.000738	0.280573	3.9e-05	5.7	5.6607	1.39106				Hiess and Bennett, 2016
Australia	Meeberrie Gneiss	biotite tonalitic gneiss	88-28-7.1	3731	3731	0.001166	0.280393	4.5e-05	-1.9	-1.8609	1.60507				Hiess and Bennett, 2016
Australia	Meeberrie Gneiss	biotite tonalitic gneiss	88-28-8.1	3731	3731	0.000346	0.280392	4.2e-05	0.2	0.213419	1.49807				Hiess and Bennett, 2016
Australia	Meeberrie Gneiss	biotite tonalitic gneiss	88-28-9.1	3731	3731	0.00067	0.280395	4.4e-05	-0.5	-0.513277	1.5694				Hiess and Bennett, 2016
Australia	Meeberrie Gneiss	biotite tonalitic gneiss	88-28-10.1	3731	3731	0.001085	0.280417	3.3e-05	-0.8	-0.796434	1.17705				Hiess and Bennett, 2016
Australia	Meeberrie Gneiss	biotite tonalitic gneiss	88-28-10.2	3731	3731	0.00104	0.280423	3.7e-05	-0.5	-0.466632	1.31973				Hiess and Bennett, 2016
Australia	Meeberrie Gneiss	biotite tonalitic gneiss	88-28-11.1	3731	3731	0.001271	0.280396	4e-05	-2	-2.02407	1.42673				Hiess and Bennett, 2016
Australia	Meeberrie Gneiss	biotite tonalitic gneiss	88-28-14.1	3731	3731	0.000593	0.280351	3.7e-05	-1.9	-1.88455	1.31973				Hiess and Bennett, 2016
Australia	Meeberrie Gneiss	biotite tonalitic gneiss	88-28-17.2	3731	3731	0.000315	0.28044	4.4e-05	2	2.00527	1.5694				Hiess and Bennett, 2016
Australia	Meeberrie Gneiss	biotite tonalitic gneiss	88-28-19.1	3731	3731	0.001163	0.28051	3.2e-05	2.3	2.32001	1.14139				Hiess and Bennett, 2016
Australia	Meeberrie Gneiss	biotite tonalitic gneiss	88-28-23.1	3731	3731	0.000897	0.280385	4.4e-05	-1.4	-1.45407	1.5694				Hiess and Bennett, 2016
Australia	Meeberrie Gneiss	biotite tonalitic gneiss	88-28-23.2	3731	3731	0.000965	0.280479	4.1e-05	1.7	1.72378	1.4624				Hiess and Bennett, 2016
Australia	Meeberrie Gneiss	biotite tonalitic gneiss	88-28-30.1	3731	3731	0.000681	0.28048	5.9e-05	2.5	2.49022	2.10443				Hiess and Bennett, 2016
Australia	Meeberrie Gneiss	biotite tonalitic gneiss	88-28-31.1	3731	3731	0.000702	0.280455	2.9e-05	1.5	1.54448	1.03438				Hiess and Bennett, 2016
Australia	Meeberrie Gneiss	biotite tonalitic gneiss	88-28-31.2	3731	3731	0.000963	0.280422	4.1e-05	-0.3	-0.304167	1.4624				Hiess and Bennett, 2016
Australia	Meeberrie Gneiss	biotite tonalitic gneiss	88-28-B-10.1	3731	3731	0.000537	0.280501	4e-05	3.6	3.60979	1.42673				Hiess and Bennett, 2016
Australia	Meeberrie Gneiss	biotite tonalitic gneiss	88-28-B-18.1	3731	3731	0.000645	0.280392	2.8e-05	-0.6	-0.555953	0.998712				Hiess and Bennett, 2016
Australia	Meeberrie Gneiss	biotite tonalitic gneiss	88-28-B-18.2	3731	3731	0.001249	0.28041	3.3e-05	-1.5	-1.46811	1.17705				Hiess and Bennett, 2016
Australia	Meeberrie Gneiss	biotite tonalitic gneiss	88-28-B-8.1	3731	3731	0.001032	0.280337	3.2e-05	-3.5	-3.51352	1.14139				Hiess and Bennett, 2016
Australia	Meeberrie Gneiss	biotite tonalitic gneiss	88-28-B-8.2	3731	3731	0.001121	0.280387	2.7e-05	-2	-1.95912	0.963044				Hiess and Bennett, 2016
Australia		Tonalite	W29-1.1	3500	3608	0.00077558	0.280419	5.39182e-05	-5.3203	-2.79973	1.9226	-2.06241	0.38087	1.52984	Kemp et al., 2010
Australia		Tonalite	W29-2.1	3500	3608	0.000685447	0.280434	6.03336e-05	-4.58486	-2.05717	2.15136				Kemp et al., 2010
Australia		Tonalite	W29-2.3	3523	3608	0.00084325	0.280465	4.76582e-05	-3.30426	-1.32373	1.69939				Kemp et al., 2010
Australia		Tonalite	W29-3.1	3621	3608	0.000862783	0.280424	2.26887e-05	-2.55054	-2.85357	0.809029				Kemp et al., 2010
Australia		Tonalite	W29-6.1	3608	3608	0.000821809	0.280443	1.50412e-05	-2.07335	-2.07335	0.536335				Kemp et al., 2010
Australia		Tonalite	W29-7.2	3586	3608	0.000584763	0.280427	1.12267e-05	-2.5675	-2.0505	0.400321				Kemp et al., 2010
Australia		Tonalite	W29-9.1	3617	3608	0.000204066	0.280413	1.43582e-05	-1.39195	-1.60598	0.511981				Kemp et al., 2010
Australia		Tonalite	W29-9.1b	3617	3608	0.000588229	0.280436	1.83537e-05	-1.5237	-1.73526	0.654452				Kemp et al., 2010
Australia		Granodiorite	W35-1.1	3516	3516	2.13486e-05	0.280433	1.83134e-05	-4.33816	-2.63993	0.652873	-0.850871	0.916735	2.49203	Kemp et al., 2010
Australia		Granodiorite	W35-3.1	3516	3516	7.01621e-05	0.280506	2.31509e-05	-1.67164	-0.147893	0.825328				Kemp et al., 2010
Australia		Granodiorite	W35-6.1	3516	3516	1.49009e-05	0.280485	2.01916e-05	-2.05841	-0.756017	0.719829				Kemp et al., 2010
Australia		Granodiorite	W35-7.1	3516	3516	4.41232e-05	0.2805	1.57193e-05	-2.508	-0.296726	0.560392				Kemp et al., 2010
Australia		Granodiorite	W35-8.1	3516	3516	4.9248e-05	0.280497	2.46147e-05	-1.67794	-0.413793	0.877514				Kemp et al., 2010
Australia		Trondjemite	W63-1.1	3282	3756	0.000930039	0.280533	1.42424e-05	-6.68564	4.32	0.508031	1.74083	1.59665	8.963	Kemp et al., 2010
Australia		Trondjemite	W63-2.1	3269	3756	0.000769172	0.28054	1.36811e-05	-6.36915	4.99304	0.48801				Kemp et al., 2010
Australia		Trondjemite	W63-3.1	3500	3756	0.00128403	0.280506	1.66318e-05	-3.44697	2.44651	0.593262				Kemp et al., 2010
Australia		Trondjemite	W63-4.1	3645	3756	0.00104758	0.28033	2.09342e-05	-5.79127	-3.21433	0.746733				Kemp et al., 2010
Australia		Trondjemite	W63-5.1	3652	3756	0.000567298	0.280284	1.38743e-05	-6.06834	-3.61818	0.494904				Kemp et al., 2010
Australia		Trondjemite	W63-5.5	3309	3756	0.000740133	0.280452	2.19867e-05	-8.52007	1.91971	0.784276				Kemp et al., 2010
Australia		Trondjemite	W63-6.2	3027	3756	0.000621905	0.280523	1.48487e-05	-12.2654	4.77053	0.52966				Kemp et al., 2010
Australia		Trondjemite	W63-7.1	3756	3756	0.000926816	0.280345	2.20372e-05	-2.37501	-2.37501	0.786078				Kemp et al., 2010
Australia		Trondjemite	W63-7.2	3756	3756	0.000462124	0.280326	3.0682e-05	-1.8522	-1.8522	1.09444				Kemp et al., 2010
Australia		Trondjemite	W63-9.1	3278	3756	0.000881795	0.280543	1.3439e-05	-6.29327	4.82168	0.479375				Kemp et al., 2010
Australia		Trondjemite	W63-10.1	3602	3756	0.00179951	0.280504	1.64515e-05	-2.4704	1.022	0.586832				Kemp et al., 2010
Australia		Trondjemite	W63-12.1	3433	3756	0.000834807	0.280307	1.09433e-05	-11.0174	-3.48862	0.390353				Kemp et al., 2010
Australia		Trondjemite	W63-14.1	3266	3756	0.000661548	0.280541	1.22121e-05	-6.15651	5.3131	0.43561				Kemp et al., 2010
Australia		Trondjemite	W63-15.1	3504	3756	0.00116598	0.280553	1.71161e-05	-1.38267	4.44139	0.61054				Kemp et al., 2010
Australia		Trondjemite	W63-15.4	3474	3756	0.000753585	0.280518	1.74976e-05	-2.36026	4.23751	0.624147				Kemp et al., 2010
Australia		Trondjemite	W63-16.1	3355	3756	0.00110076	0.28056	2.14393e-05	-4.41022	4.86026	0.764748				Kemp et al., 2010
Australia		Trondjemite	W63-16.3	3244	3756	0.00101857	0.280568	2.05154e-05	-6.50691	5.34482	0.731794				Kemp et al., 2010
Australia		Trondjemite	W63-3.1r	3500	3756	0.00109874	0.280481	1.30809e-05	-3.90173	2.02527	0.466602				Kemp et al., 2010
Australia		Trondjemite	W63-5.1b	3652	3756	0.0006644	0.280311	1.35937e-05	-5.33483	-2.89169	0.484893				Kemp et al., 2010
Australia		Porphyritic granodiorite	W65-3.1	3408	3600	5.9309e-05	0.280485	2.39019e-05	-5.32819	1.15075	0.852273	0.336353	1.0881	1.84653	Kemp et al., 2010
Australia		Porphyritic granodiorite	W65-4.1	3454	3600	6.75747e-05	0.280469	1.37032e-05	-4.85407	0.55409	0.488615				Kemp et al., 2010
Australia		Porphyritic granodiorite	W65-11.1	3574	3600	7.23298e-05	0.280435	1.55814e-05	-3.32877	-0.695783	0.555589				Kemp et al., 2010
South Africa	Steynsdorp	tonalitic gneiss	Stey1408_1	3519	3523	0.001	0.280578	5.6e-05	0.2	0.332829	1.99643	1.14574	1.1267	2.46553	Guitreau et al., 2012
South Africa	Steynsdorp	tonalitic gneiss	Stey1408_2	3515	3523	0.00072	0.280575	5.9e-05	0.7	0.904522	2.10338				Guitreau et al., 2012
South Africa	Steynsdorp	tonalitic gneiss	Stey1408_3	3280	3523	0.002	0.280652	6.6e-05	-4.8	0.54724	2.35294				Guitreau et al., 2012
South Africa	Steynsdorp	tonalitic gneiss	Stey1408_4	3521	3523	0.00088	0.280639	8.1e-05	2.8	2.79836	2.88769				Guitreau et al., 2012
South Africa	Steynsdorp	tonalitic gneiss	Stp_1	3443	3518	0.0011	0.280548	4.2e-05	-2.8	-1.09455	1.4973	-0.410266	1.93573	7.35971	Guitreau et al., 2012
South Africa	Steynsdorp	tonalitic gneiss	Stp_1	3466	3518	0.0011	0.280633	5e-05	0.7	1.93571	1.78251				Guitreau et al., 2012
South Africa	Steynsdorp	tonalitic gneiss	Stp_3	3510	3518	0.0025	0.280571	7.3e-05	-3.9	-3.66281	2.60246				Guitreau et al., 2012
South Africa	Steynsdorp	tonalitic gneiss	Stp_4	3505	3518	0.0011	0.28051	6.5e-05	-2.7	-2.44926	2.31726				Guitreau et al., 2012
South Africa	Steynsdorp	tonalitic gneiss	Stp_5	3503	3518	0.0011	0.280586	5.6e-05	0	0.26015	1.99641				Guitreau et al., 2012
South Africa	Steynsdorp	tonalitic gneiss	Stp_8	3508	3518	0.0011	0.280535	8.3e-05	-1.8	-1.55801	2.95896				Guitreau et al., 2012
South Africa	Steynsdorp	tonalitic gneiss	Stp_9	3520	3518	0.00077	0.28066	6.3e-05	3.7	3.69691	2.24596				Guitreau et al., 2012
South Africa		Heterogeneous layered grey gneiss	AGC150 01	3644	3644	0.00229	0.280561	2e-05	-1.2	-0.703951	0.713217	0.859506	2.66723	11.4952	Kröner et al., 2014
South Africa		Heterogeneous layered grey gneiss	AGC150 02	3644	3644	0.001397	0.280487	2.6e-05	-1.7	-1.10092	0.927182				Kröner et al., 2014
South Africa		Heterogeneous layered grey gneiss	AGC150 03	3644	3644	0.001554	0.280705	2.4e-05	5.8	6.27899	0.855861				Kröner et al., 2014
South Africa		Heterogeneous layered grey gneiss	AGC150 04	3644	3644	0.002087	0.280799	2.9e-05	7.8	8.29298	1.03416				Kröner et al., 2014
South Africa		Heterogeneous layered grey gneiss	AGC150 05	3644	3644	0.003858	0.280608	4.3e-05	-3.5	-2.96446	1.53342				Kröner et al., 2014
South Africa		Heterogeneous layered grey gneiss	AGC150 06	3644	3644	0.001267	0.280445	3.5e-05	-2.8	-2.2723	1.24813				Kröner et al., 2014
South Africa		Heterogeneous layered grey gneiss	AGC150 07	3644	3644	0.001609	0.280443	2.2e-05	-3.8	-3.20224	0.784539				Kröner et al., 2014
South Africa		Heterogeneous layered grey gneiss	AGC150 08	3644	3644	0.002233	0.280733	2.1e-05	5	5.57282	0.748878				Kröner et al., 2014
South Africa		Heterogeneous layered grey gneiss	AGC150 09	3644	3644	0.001833	0.280554	2.5e-05	-0.4	0.193752	0.891521				Kröner et al., 2014
South Africa		Heterogeneous layered grey gneiss	AGC150 10	3644	3644	0.002195	0.280532	2.3e-05	-2	-1.49961	0.8202				Kröner et al., 2014
South Africa		Homogeneous part of layered grey gneiss	AGC150b 01	3661	3661	0.001345	0.280456	4.4e-05	-2.3	-1.68509	1.56914	-1.08895	0.903419	6.312	Kröner et al., 2014
South Africa		Homogeneous part of layered grey gneiss	AGC150b 02	3661	3661	0.002545	0.280614	4.5e-05	0.4	0.922216	1.6048				Kröner et al., 2014
South Africa		Homogeneous part of layered grey gneiss	AGC150b 04	3661	3661	0.001364	0.280553	3e-05	1.2	1.72622	1.06987				Kröner et al., 2014
South Africa		Homogeneous part of layered grey gneiss	AGC150b 05	3661	3661	0.002092	0.280508	2.7e-05	-2.3	-1.71517	0.962882				Kröner et al., 2014
South Africa		Homogeneous part of layered grey gneiss	AGC150b 06	3661	3661	0.002413	0.2806	2.9e-05	0.2	0.755951	1.03421				Kröner et al., 2014
South Africa		Homogeneous part of layered grey gneiss	AGC150b 07	3661	3661	0.001761	0.28047	3.3e-05	-2.8	-2.23529	1.17686				Kröner et al., 2014
South Africa		Homogeneous part of layered grey gneiss	AGC150b 08	3661	3661	0.001516	0.280474	3.4e-05	-2	-1.47456	1.21252				Kröner et al., 2014
South Africa		Homogeneous part of layered grey gneiss	AGC150b 09	3661	3661	0.001477	0.280384	3.5e-05	-5.1	-4.58578	1.24818				Kröner et al., 2014
South Africa		Homogeneous part of layered grey gneiss	AGC150b 10	3661	3661	0.002164	0.280568	3.6e-05	-0.3	0.242931	1.28384				Kröner et al., 2014
South Africa		Homogeneous part of layered grey gneiss	AGC150b 11	3661	3661	0.001485	0.280443	3e-05	-3.1	-2.50189	1.06987				Kröner et al., 2014
South Africa		Homogeneous part of layered grey gneiss	AGC150b 12	3661	3661	0.001011	0.280454	3.4e-05	-1.4	-0.913801	1.21252				Kröner et al., 2014
South Africa		Homogeneous part of layered grey gneiss	AGC150b 13	3661	3661	0.001585	0.280473	3.4e-05	-2.2	-1.6843	1.21252				Kröner et al., 2014
South Africa		Homogeneous part of layered grey gneiss	AGC150b 14	3661	3661	0.003195	0.28064	3.1e-05	-0.3	0.209626	1.10553				Kröner et al., 2014
South Africa		Homogeneous part of layered grey gneiss	AGC15bb 03	3661	3661	0.000941	0.28041	3.1e-05	-2.9	-2.30635	1.10553				Kröner et al., 2014
South Africa		homogeneous tonalitic gneiss	AGC216 01	3553	3553	0.001726	0.280628	1.9e-05	0.5	1.03572	0.677409	1.57653	0.613175	3.52208	Kröner et al., 2014
South Africa		homogeneous tonalitic gneiss	AGC216 02	3553	3553	0.000744	0.280598	1e-05	1.9	2.36735	0.356531				Kröner et al., 2014
South Africa		homogeneous tonalitic gneiss	AGC216 03	3553	3553	0.000997	0.280579	1.7e-05	0.5	1.07129	0.606103				Kröner et al., 2014
South Africa		homogeneous tonalitic gneiss	AGC216 04	3553	3553	0.001264	0.280559	1.2e-05	-0.8	-0.294646	0.427837				Kröner et al., 2014
South Africa		homogeneous tonalitic gneiss	AGC216 05	3553	3553	0.000703	0.280563	1.3e-05	0.7	1.21974	0.46349				Kröner et al., 2014
South Africa		homogeneous tonalitic gneiss	AGC216 06	3553	3553	0.000958	0.280607	9e-06	1.7	2.16494	0.320878				Kröner et al., 2014
South Africa		homogeneous tonalitic gneiss	AGC216 07	3553	3553	0.000662	0.280603	1.3e-05	2.2	2.74612	0.46349				Kröner et al., 2014
South Africa		homogeneous tonalitic gneiss	AGC216 08	3553	3553	0.00085	0.280599	1e-05	1.6	2.14381	0.356531				Kröner et al., 2014
South Africa		homogeneous tonalitic gneiss	AGC216 09	3553	3553	0.001064	0.280617	9e-06	1.8	2.26228	0.320878				Kröner et al., 2014
South Africa		homogeneous tonalitic gneiss	AGC216 10	3553	3553	0.000923	0.280558	1.3e-05	0	0.503527	0.46349				Kröner et al., 2014
South Africa		homogeneous tonalitic gneiss	AGC216 11	3553	3553	0.000776	0.280547	1.2e-05	0	0.470792	0.427837				Kröner et al., 2014
South Africa		homogeneous tonalitic gneiss	AGC216 12	3553	3553	0.000888	0.280632	1.2e-05	2.7	3.22744	0.427837				Kröner et al., 2014
South Africa		Homogneous tonalitic gneiss	AGC370 01	3553	3553	0.001163	0.280578	1.1e-05	0.1	0.629732	0.392184	-1.1237	0.578471	2.82401	Kröner et al., 2014
South Africa		Homogneous tonalitic gneiss	AGC370 02	3553	3553	0.002263	0.28059	1.2e-05	-2.1	-1.63219	0.427837				Kröner et al., 2014
South Africa		Homogneous tonalitic gneiss	AGC370 03	3553	3553	0.003269	0.280646	1.4e-05	-2.6	-2.09552	0.499143				Kröner et al., 2014
South Africa		Homogneous tonalitic gneiss	AGC370 04	3553	3553	0.001793	0.280542	1.3e-05	-2.7	-2.19428	0.46349				Kröner et al., 2014
South Africa		Homogneous tonalitic gneiss	AGC370 05	3553	3553	0.001148	0.280508	1.2e-05	-2.3	-1.82931	0.427837				Kröner et al., 2014
South Africa		Homogneous tonalitic gneiss	AGC370 06	3553	3553	0.002817	0.280659	1.6e-05	-1	-0.526787	0.570449				Kröner et al., 2014
South Africa		Homogneous tonalitic gneiss	AGC370 07	3553	3553	0.002156	0.280612	1.2e-05	-1.1	-0.586182	0.427837				Kröner et al., 2014
South Africa		Homogneous tonalitic gneiss	AGC370 08	3553	3553	0.002091	0.280601	1.4e-05	-1.3	-0.819426	0.499143				Kröner et al., 2014
South Africa		Homogneous tonalitic gneiss	AGC370 09	3553	3553	0.000504	0.280503	1.1e-05	-1	-0.43284	0.392184				Kröner et al., 2014
South Africa		Homogneous tonalitic gneiss	AGC370 10	3553	3553	0.001903	0.280562	1.6e-05	-2.3	-1.75019	0.570449				Kröner et al., 2014
South Africa		Layered homogeneous tonalitic gneiss	AGC138 01	3537	3537	0.001419	0.28055	1.4e-05	-1.9	-1.36067	0.499124	-1.13888	0.874687	4.07403	Kröner et al., 2014
South Africa		Layered homogeneous tonalitic gneiss	AGC138 02	3537	3537	0.001501	0.280535	1.1e-05	-2.6	-2.09502	0.392169				Kröner et al., 2014
South Africa		Layered homogeneous tonalitic gneiss	AGC138 03	3537	3537	0.000724	0.280498	1.2e-05	-2	-1.5231	0.427821				Kröner et al., 2014
South Africa		Layered homogeneous tonalitic gneiss	AGC138 04	3537	3537	0.001267	0.280576	1.8e-05	-0.6	-0.0637946	0.641731				Kröner et al., 2014
South Africa		Layered homogeneous tonalitic gneiss	AGC138 05	3537	3537	0.001497	0.280649	2.2e-05	1.5	1.97902	0.784338				Kröner et al., 2014
South Africa		Layered homogeneous tonalitic gneiss	AGC138 06	3537	3537	0.001329	0.280528	1.3e-05	-2.4	-1.92597	0.463472				Kröner et al., 2014
South Africa		Layered homogeneous tonalitic gneiss	AGC138 07	3537	3537	0.001229	0.280522	1.2e-05	-2.4	-1.8965	0.427821				Kröner et al., 2014
South Africa		Layered homogeneous tonalitic gneiss	AGC138 08	3537	3537	0.002093	0.280587	1.2e-05	-2.2	-1.68191	0.427821				Kröner et al., 2014
South Africa		Layered homogeneous tonalitic gneiss	AGC138 09	3537	3537	0.001551	0.28055	1.2e-05	-2.2	-1.68193	0.427821				Kröner et al., 2014
South Africa		Layered homogeneous tonalitic gneiss	AGC185 01	3505	3505	0.001189	0.280568	2.2e-05	-1.4	-0.896359	0.784278	-1.38767	0.554187	2.12762	Kröner et al., 2014
South Africa		Layered homogeneous tonalitic gneiss	AGC185 02	3505	3505	0.000922	0.280529	1.5e-05	-2.2	-1.64298	0.534735				Kröner et al., 2014
South Africa		Layered homogeneous tonalitic gneiss	AGC185 03	3505	3505	0.00204	0.280623	2.4e-05	-1.5	-0.987282	0.855576				Kröner et al., 2014
South Africa		Layered homogeneous tonalitic gneiss	AGC185 05	3505	3505	0.00245	0.280659	2.2e-05	-1.2	-0.692359	0.784278				Kröner et al., 2014
South Africa		Layered homogeneous tonalitic gneiss	AGC185 07	3505	3505	0.001775	0.280586	3.5e-05	-2.2	-1.66743	1.24772				Kröner et al., 2014
South Africa		Layered homogeneous tonalitic gneiss	AGC185 08	3505	3505	0.001425	0.28053	2.4e-05	-3.3	-2.81998	0.855576				Kröner et al., 2014
South Africa		Layered homogeneous tonalitic gneiss	AGC185 09	3505	3505	0.00193	0.280615	2.1e-05	-1.5	-1.00728	0.748629				Kröner et al., 2014
South Africa		Mylonitic tonalitic gneiss	AGC207 01	3601	3601	0.002169	0.280546	1.5e-05	-2.4	-1.89769	0.534858	-1.62606	1.04262	4.59055	Kröner et al., 2014
South Africa		Mylonitic tonalitic gneiss	AGC207 02	3601	3601	0.002776	0.280549	1.3e-05	-3.8	-3.29588	0.463543				Kröner et al., 2014
South Africa		Mylonitic tonalitic gneiss	AGC207 03	3601	3601	0.002166	0.280494	1.3e-05	-4.3	-3.74442	0.463543				Kröner et al., 2014
South Africa		Mylonitic tonalitic gneiss	AGC207 04	3601	3601	0.00165	0.280484	1.3e-05	-3.4	-2.82148	0.463543				Kröner et al., 2014
South Africa		Mylonitic tonalitic gneiss	AGC207 05	3601	3601	0.002383	0.280559	1.3e-05	-2.5	-1.9648	0.463543				Kröner et al., 2014
South Africa		Mylonitic tonalitic gneiss	AGC207 06	3601	3601	0.0014	0.280545	1.4e-05	-0.6	-0.0264724	0.499201				Kröner et al., 2014
South Africa		Mylonitic tonalitic gneiss	AGC207 07	3601	3601	0.002982	0.280568	1.8e-05	-3.7	-3.12921	0.641829				Kröner et al., 2014
South Africa		Mylonitic tonalitic gneiss	AGC207 08	3601	3601	0.000963	0.280517	1.4e-05	-0.5	0.0587455	0.499201				Kröner et al., 2014
South Africa		Mylonitic tonalitic gneiss	AGC207 09	3601	3601	0.00112	0.28055	1.2e-05	0.3	0.846123	0.427886				Kröner et al., 2014
South Africa		Mylonitic tonalitic gneiss	AGC207 10	3601	3601	0.001562	0.280549	1.1e-05	-0.8	-0.285551	0.392229				Kröner et al., 2014
South Africa		Non-layered tonalitic gneiss	AGC200 01	3534	3534	0.001328	0.28056	1.7e-05	-1.4	-0.851515	0.606075	1.14881	0.459921	3.87683	Kröner et al., 2014
South Africa		Non-layered tonalitic gneiss	AGC200 02	3534	3534	0.000755	0.28057	1.5e-05	0.4	0.898314	0.534772				Kröner et al., 2014
South Africa		Non-layered tonalitic gneiss	AGC200 03	3534	3534	0.001175	0.280654	1.8e-05	2.4	2.87176	0.641727				Kröner et al., 2014
South Africa		Non-layered tonalitic gneiss	AGC200 04	3534	3534	0.000851	0.280567	1.6e-05	0	0.557924	0.570424				Kröner et al., 2014
South Africa		Non-layered tonalitic gneiss	AGC200 05	3534	3534	0.000681	0.280607	1.5e-05	1.9	2.39736	0.534772				Kröner et al., 2014
South Africa		Non-layered tonalitic gneiss	AGC200 06	3534	3534	0.000793	0.280561	1.4e-05	0	0.485049	0.499121				Kröner et al., 2014
South Africa		Non-layered tonalitic gneiss	AGC200 07	3534	3534	0.001075	0.280576	1.6e-05	-0.2	0.334106	0.570424				Kröner et al., 2014
South Africa		Non-layered tonalitic gneiss	AGC200 08	3534	3534	0.000602	0.280609	1.2e-05	2.1	2.66076	0.427818				Kröner et al., 2014
South Africa		Non-layered tonalitic gneiss	AGC200 09	3534	3534	0.000621	0.280579	1.2e-05	1	1.54501	0.427818				Kröner et al., 2014
South Africa		Non-layered tonalitic gneiss	AGC200 10	3534	3534	0.001085	0.28058	1.6e-05	-0.1	0.452396	0.570424				Kröner et al., 2014
South Africa		Non-layered tonalitic gneiss	AGC200 11	3534	3534	0.000989	0.280606	1.7e-05	1.1	1.61277	0.606075				Kröner et al., 2014
South Africa		Non-layered tonalitic gneiss	AGC200 12	3534	3534	0.000612	0.280601	1.4e-05	1.9	2.35123	0.499121				Kröner et al., 2014
South Africa		Non-layered tonalitic gneiss	AGC200 13	3534	3534	0.000999	0.280609	1.7e-05	1.2	1.69541	0.606075				Kröner et al., 2014
South Africa		Non-layered tonalitic gneiss	AGC200 14	3534	3534	0.000849	0.280562	1.5e-05	-0.1	0.38453	0.534772				Kröner et al., 2014
South Africa		Non-layered tonalitic gneiss	AGC200 15	3534	3534	0.000877	0.280547	1.5e-05	-0.7	-0.218327	0.534772				Kröner et al., 2014
South Africa		Non-layered tonalitic gneiss	AGC200 16	3534	3534	0.001213	0.280586	1.7e-05	-0.2	0.355058	0.606075				Kröner et al., 2014
South Africa		Non-layered tonalitic gneiss	AGC200 17	3534	3534	0.001319	0.280582	1.6e-05	-0.6	-0.0452984	0.570424				Kröner et al., 2014
South Africa		Non-layered tonalitic gneiss	AGC200 18	3534	3534	0.000808	0.280585	1.4e-05	0.8	1.30421	0.499121				Kröner et al., 2014
South Africa		Non-layered tonalitic gneiss	AGC200 19	3534	3534	0.000659	0.280596	1.1e-05	1.5	2.05869	0.392166				Kröner et al., 2014
South Africa		Non-layered tonalitic gneiss	AGC200 20	3534	3534	0.000547	0.280614	1.3e-05	2.5	2.97275	0.463469				Kröner et al., 2014
South Africa		Non-layered tonalitic gneiss	AGC200 21	3534	3534	0.000771	0.280601	1.5e-05	1.5	1.9646	0.534772				Kröner et al., 2014
South Africa		Non-layered tonalitic gneiss	AGC200 22	3534	3534	0.000834	0.280565	1.6e-05	0	0.527959	0.570424				Kröner et al., 2014
South Africa		Non-layered tonalitic gneiss	AGC200 23	3534	3534	0.000733	0.28062	1.4e-05	2.2	2.73438	0.499121				Kröner et al., 2014
South Africa		Non-layered tonalitic gneiss	AGC200 24	3534	3534	0.003153	0.280683	2.5e-05	-1.4	-0.904078	0.891287				Kröner et al., 2014
South Africa		Non-layered tonalitic gneiss	AGC200 25	3534	3534	0.001489	0.280611	1.6e-05	0.1	0.57522	0.570424				Kröner et al., 2014
South Africa		Porphyritic tonalitic gneiss	AGC01-55D 12	3647	3647	0.002189	0.280493	1.3e-05	-3.3	-2.80818	0.463594	-0.236121	0.807451	10.5972	Kröner et al., 2014
South Africa		Porphyritic tonalitic gneiss	AGC-01-5D 01	3647	3647	0.00212	0.280489	1.6e-05	-3.3	-2.77745	0.570578				Kröner et al., 2014
South Africa		Porphyritic tonalitic gneiss	AGC-01-5D 02	3647	3647	0.002788	0.280548	1.6e-05	-2.9	-2.35194	0.570578				Kröner et al., 2014
South Africa		Porphyritic tonalitic gneiss	AGC-01-5D 03	3647	3647	0.003172	0.28061	1.6e-05	-1.7	-1.10584	0.570578				Kröner et al., 2014
South Africa		Porphyritic tonalitic gneiss	AGC-01-5D 04	3647	3647	0.001453	0.280454	1.5e-05	-2.9	-2.3496	0.534917				Kröner et al., 2014
South Africa		Porphyritic tonalitic gneiss	AGC-01-5D 05	3647	3647	0.001258	0.280518	1.4e-05	-0.1	0.422687	0.499256				Kröner et al., 2014
South Africa		Porphyritic tonalitic gneiss	AGC-01-5D 06	3647	3647	0.002829	0.280597	1.5e-05	-1.2	-0.70757	0.534917				Kröner et al., 2014
South Africa		Porphyritic tonalitic gneiss	AGC-01-5D 07	3647	3647	0.002315	0.280568	1.4e-05	-1	-0.450203	0.499256				Kröner et al., 2014
South Africa		Porphyritic tonalitic gneiss	AGC-01-5D 08	3647	3647	0.003036	0.280598	1.7e-05	-1.7	-1.19204	0.606239				Kröner et al., 2014
South Africa		Porphyritic tonalitic gneiss	AGC-01-5D 09	3647	3647	0.001779	0.280474	1.4e-05	-3	-2.45553	0.499256				Kröner et al., 2014
South Africa		Porphyritic tonalitic gneiss	AGC-01-5D 10	3647	3647	0.002583	0.280607	1.7e-05	-0.3	0.267171	0.606239				Kröner et al., 2014
South Africa		Porphyritic tonalitic gneiss	AGC-01-5D 11	3647	3647	0.001999	0.28057	1.3e-05	-0.1	0.415139	0.463594				Kröner et al., 2014
South Africa		Porphyritic tonalitic gneiss	AGC-01-5D 13	3647	3647	0.000647	0.280379	1.3e-05	-3.6	-2.99893	0.463594				Kröner et al., 2014
South Africa		Porphyritic tonalitic gneiss	AGC-01-5D 14	3647	3647	0.001275	0.280435	1.3e-05	-3.1	-2.5799	0.463594				Kröner et al., 2014
South Africa		Porphyritic tonalitic gneiss	AGC-01-5D 15	3647	3647	0.002357	0.280541	1.5e-05	-2.1	-1.51859	0.534917				Kröner et al., 2014
South Africa		Porphyritic tonalitic gneiss	AGC-01-5D 16	3647	3647	0.003469	0.280673	1.9e-05	-0.1	0.394533	0.677561				Kröner et al., 2014
South Africa		Porphyritic tonalitic gneiss	AGC-01-5D 17	3647	3647	0.002306	0.280606	1.6e-05	0.4	0.927533	0.570578				Kröner et al., 2014
South Africa		Porphyritic tonalitic gneiss	AGC-01-5D 18	3647	3647	0.001647	0.280498	1.3e-05	-1.8	-1.26798	0.463594				Kröner et al., 2014
South Africa		Porphyritic tonalitic gneiss	AGC-01-5D 19	3647	3647	0.002397	0.280743	1.5e-05	5	5.58445	0.534917				Kröner et al., 2014
South Africa		Porphyritic tonalitic gneiss	AGC-01-5D 20	3647	3647	0.002897	0.280576	1.5e-05	-2.2	-1.62732	0.534917				Kröner et al., 2014
South Africa		Porphyritic tonalitic gneiss	AGC-01-5D 21	3647	3647	0.003044	0.280549	1.4e-05	-3.5	-2.95954	0.499256				Kröner et al., 2014
South Africa		Porphyritic tonalitic gneiss	AGC-01-5D 22	3647	3647	0.002016	0.280511	1.3e-05	-2.3	-1.73158	0.463594				Kröner et al., 2014
South Africa		Porphyritic tonalitic gneiss	AGC-01-5D 23	3647	3647	0.000668	0.280456	1.1e-05	-0.9	-0.305796	0.392272				Kröner et al., 2014
South Africa		Porphyritic tonalitic gneiss	AGC-01-5D 24	3647	3647	0.001553	0.280478	1.3e-05	-2.3	-1.74501	0.463594				Kröner et al., 2014
South Africa		Porphyritic tonalitic gneiss	AGC-01-5D 25	3647	3647	0.003071	0.280608	1.7e-05	-1.5	-0.923376	0.606239				Kröner et al., 2014
South Africa		Porphyritic tonalitic gneiss	AGC-01-5D 26	3647	3647	0.003436	0.280597	1.7e-05	-2.8	-2.23279	0.606239				Kröner et al., 2014
South Africa		Porphyritic tonalitic gneiss	AGC-01-5D 27	3647	3647	0.002734	0.280512	1.6e-05	-4.1	-3.50006	0.570578				Kröner et al., 2014
South Africa		Porphyritic tonalitic gneiss	AGC-01-5D 28	3647	3647	0.0026	0.280604	1.4e-05	-0.4	0.117471	0.499256				Kröner et al., 2014
South Africa		Porphyritic tonalitic gneiss	AGC-01-5D 29	3647	3647	0.002249	0.280587	1.3e-05	-0.1	0.393197	0.463594				Kröner et al., 2014
South Africa		Porphyritic tonalitic gneiss	AGC-01-5D 30	3647	3647	0.001335	0.280498	1.5e-05	-1	-0.484015	0.534917				Kröner et al., 2014
South Africa		Porphyritic tonalitic gneiss	AGC-01-5L 01	3647	3647	0.001817	0.280513	1.2e-05	-1.7	-1.16023	0.427933				Kröner et al., 2014
South Africa		Porphyritic tonalitic gneiss	AGC-01-5L 02	3647	3647	0.001268	0.280461	1.3e-05	-2.2	-1.63512	0.463594				Kröner et al., 2014
South Africa		Porphyritic tonalitic gneiss	AGC-01-5L 03	3647	3647	0.001532	0.280545	1e-05	0.2	0.697052	0.356611				Kröner et al., 2014
South Africa		Porphyritic tonalitic gneiss	AGC-01-5L 04	3647	3647	0.00241	0.280712	1.6e-05	3.9	4.44629	0.570578				Kröner et al., 2014
South Africa		Porphyritic tonalitic gneiss	AGC-01-5L 05	3647	3647	0.001795	0.280743	1.5e-05	6.6	7.09711	0.534917				Kröner et al., 2014
South Africa		Porphyritic tonalitic gneiss	AGC-01-5L 06	3647	3647	0.001798	0.280695	1.2e-05	4.8	5.37783	0.427933				Kröner et al., 2014
South Africa		Porphyritic tonalitic gneiss	AGC-01-5L 07	3647	3647	0.001414	0.280543	1.1e-05	0.4	0.92223	0.392272				Kröner et al., 2014
South Africa		Porphyritic tonalitic gneiss	AGC-01-5L 08	3647	3647	0.001689	0.280525	1.3e-05	-1	-0.410668	0.463594				Kröner et al., 2014
South Africa		Porphyritic tonalitic gneiss	AGC-01-5L 09	3647	3647	0.002546	0.280735	1.6e-05	4.4	4.92476	0.570578				Kröner et al., 2014
South Africa		Porphyritic tonalitic gneiss	AGC01-55L 10	3647	3647	0.001713	0.28059	1.3e-05	1.3	1.847	0.463594				Kröner et al., 2014
South Africa		tonalite gneiss	B87-5-50	3534	3534	0.001114	0.280586	2e-05	1.77	0.595788	0.713029	0.213316	0.605091	1.65512	Amelin et al., 2000
South Africa		tonalite gneiss	B87-5-51	3534	3534	0.001114	0.280593	1.5e-05	1.15	0.845348	0.534772				Amelin et al., 2000
South Africa		tonalite gneiss	B87-5-52	3534	3534	0.001734	0.280608	1.5e-05	1.64	-0.12748	0.534772				Amelin et al., 2000
South Africa		tonalite gneiss	B87-5-53	3534	3534	0.001934	0.280641	1.7e-05	1.84	0.562697	0.606075				Amelin et al., 2000
South Africa		tonalite gneiss	B87-5-49	3534	3534	0.000827	0.280527	4e-05	0.95	-0.809776	1.42606				Amelin et al., 2000
South Africa		trondhjeimite gneiss	B87-24-55	3511	3511	0.000965	0.280564	1.7e-05	0.13	-0.359788	0.606042	0.52746	1.0865	2.46549	Amelin et al., 2000
South Africa		trondhjeimite gneiss	B87-24-54	3511	3511	0.000739	0.280567	7e-06	0.42	0.29298	0.249547				Amelin et al., 2000
South Africa		trondhjeimite gneiss	B87-24-56	3511	3511	0.001259	0.280596	3.3e-05	2.16	0.0709479	1.17643				Amelin et al., 2000
South Africa		trondhjeimite gneiss	B87-24-57	3511	3511	0.001435	0.280665	3e-05	4.14	2.1057	1.06949				Amelin et al., 2000
São Francisco		Tonalite	CSD23B - 7	3507	3507	0.000570446	0.280555	2.07694e-05	0.178888	0.178888	0.740412	-2.44183	1.57541	8.94497	dos Santos et al., 2022
São Francisco		Tonalite	CSD23B - 8	3507	3507	0.000535575	0.280566	2.16492e-05	0.63758	0.63758	0.771776				dos Santos et al., 2022
São Francisco		Tonalite	CSD23B - 9	3507	3507	0.000427899	0.280591	2.19518e-05	1.794	1.794	0.782562				dos Santos et al., 2022
São Francisco		Tonalite	CSD23B - 14	3507	3507	0.000427927	0.280388	0.000105394	-5.43465	-5.43465	3.75722				dos Santos et al., 2022
São Francisco		Tonalite	CSD23B - 15	3507	3507	0.00074217	0.280361	9.78603e-05	-7.15097	-7.15097	3.48864				dos Santos et al., 2022
São Francisco		Tonalite	CSD23B - 27	3507	3507	0.000438234	0.280434	7.23531e-05	-3.82777	-3.82777	2.57933				dos Santos et al., 2022
São Francisco		Tonalite	CSD23B - 29	3507	3507	0.000447905	0.280513	3.18808e-05	-1.02071	-1.02071	1.13652				dos Santos et al., 2022
São Francisco		Tonalite	CSD23B - 32	3507	3507	0.000315502	0.280509	2.3774e-05	-0.852673	-0.852673	0.847525				dos Santos et al., 2022
São Francisco		Tonalite	CSD23B - 34	3507	3507	0.000670024	0.28041	0.000124401	-5.24591	-5.24591	4.43479				dos Santos et al., 2022
São Francisco		Tonalite	CSD23B - 35	3507	3507	0.000352227	0.280506	3.62897e-05	-1.0514	-1.0514	1.2937				dos Santos et al., 2022
São Francisco		Tonalite	CSD23B - 36	3507	3507	0.000827268	0.280395	8.35877e-05	-6.1613	-6.1613	2.97983				dos Santos et al., 2022
São Francisco		Tonalite	CSD23B - 39	3507	3507	0.000288698	0.280494	3.74686e-05	-1.32533	-1.32533	1.33572				dos Santos et al., 2022
São Francisco		Tonalite	CSD23B - 40	3507	3507	0.000498843	0.280481	0.000210973	-2.28351	-2.28351	7.521				dos Santos et al., 2022
São Francisco	Mairi gneiss	granodioritic gneiss	17ED-14-1-z12c	3598	3642	0.001216	0.280349	1.7e-05	-6.6	-5.61384	0.606232	-2.70448	1.61733	6.15413	Oliveira et al., 2020
São Francisco	Mairi gneiss	granodioritic gneiss	17ED-14-1-z17c	3589	3642	0.000225	0.280372	1.3e-05	-3.6	-2.30709	0.463589				Oliveira et al., 2020
São Francisco	Mairi gneiss	granodioritic gneiss	17ED-14-1-z27c	3579	3642	0.000892	0.280391	1.5e-05	-4.8	-3.30313	0.53491				Oliveira et al., 2020
São Francisco	Mairi gneiss	granodioritic gneiss	17ED-14-1-z29	3585	3642	0.000755	0.28039	1.2e-05	-4.3	-2.99504	0.427928				Oliveira et al., 2020
São Francisco	Mairi gneiss	granodioritic gneiss	17ED-14-1-z31c	3584	3642	0.000483	0.28047	1.5e-05	-0.8	0.540298	0.53491				Oliveira et al., 2020
São Francisco	Mairi gneiss	granodioritic gneiss	17ED-14-1-z8c	3601	3642	0.000719	0.2804	1.3e-05	-3.5	-2.5481	0.463589				Oliveira et al., 2020
São Francisco	Mairi gneiss	granodioritic gneiss	18DE-17a-z16c	3561	3599	0.000595	0.280445	1.2e-05	-2.5	-1.64304	0.427884	-1.84901	0.500635	3.2827	Oliveira et al., 2020
São Francisco	Mairi gneiss	granodioritic gneiss	18DE-17a-z1c	3609	3599	0.00078	0.280409	2.2e-05	-3.2	-3.38517	0.784454				Oliveira et al., 2020
São Francisco	Mairi gneiss	granodioritic gneiss	18DE-17a-z26c	3583	3599	0.001021	0.280483	2.1e-05	-1.7	-1.34381	0.748797				Oliveira et al., 2020
São Francisco	Mairi gneiss	granodioritic gneiss	18DE-17a-z29c	3554	3599	0.000747	0.280448	2.7e-05	-3	-1.91276	0.962739				Oliveira et al., 2020
São Francisco	Mairi gneiss	granodioritic gneiss	18DE-17a-z2c	3529	3599	0.000837	0.280424	2.1e-05	-4.6	-2.99157	0.748797				Oliveira et al., 2020
São Francisco	Mairi gneiss	granodioritic gneiss	18DE-17a-z31c	3532	3599	0.000797	0.280447	2.2e-05	-3.6	-2.07233	0.784454				Oliveira et al., 2020
São Francisco	Mairi gneiss	granodioritic gneiss	18DE-17a-z33c	3545	3599	0.000858	0.280456	1.6e-05	-3.2	-1.90259	0.570512				Oliveira et al., 2020
São Francisco	Mairi gneiss	granodioritic gneiss	18DE-17a-z36c	3570	3599	0.000923	0.280449	1.3e-05	-3	-2.31328	0.463541				Oliveira et al., 2020
São Francisco	Mairi gneiss	granodioritic gneiss	18DE-17a-z39c	3553	3599	0.000771	0.280468	1.9e-05	-2.3	-1.2591	0.677483				Oliveira et al., 2020
São Francisco	Mairi gneiss	granodioritic gneiss	18DE-17a-z3c	3591	3599	0.000405	0.280475	2.3e-05	-0.3	-0.102465	0.820111				Oliveira et al., 2020
São Francisco	Mairi gneiss	granodioritic gneiss	18DE-17a-z43c	3558	3599	0.000898	0.280481	2e-05	-2.1	-1.1103	0.71314				Oliveira et al., 2020
São Francisco	Mairi gneiss	granodioritic gneiss	18DE-17a-z44c	3554	3599	0.000383	0.280416	1.5e-05	-3.2	-2.15171	0.534855				Oliveira et al., 2020
Anshan, NCC		layered migmatite	C209-1-@11-1	3784.48	3819	0.000869808	0.280407	1.64174e-05	0.0635571	1.45253	0.585704	1.88033	1.13991	4.71542	Wang et al., 2015
Anshan, NCC		layered migmatite	C209-1-@24	3691.41	3819	0.000827785	0.280504	1.34042e-05	1.50312	5.04545	0.478207				Wang et al., 2015
Anshan, NCC		layered migmatite	C209-1-@27	3749.05	3819	0.000522727	0.28035	1.2477e-05	-1.89422	0.330033	0.445127				Wang et al., 2015
Anshan, NCC		layered migmatite	C209-1-@31	3789.3	3819	0.00138385	0.280428	1.74094e-05	-0.402902	0.863505	0.621093				Wang et al., 2015
Anshan, NCC		layered migmatite	C209-1-@34-1	3818.66	3819	0.00101799	0.280469	1.93124e-05	2.68485	3.2837	0.688986				Wang et al., 2015
Anshan, NCC		layered migmatite	C209-1-@41	3741.49	3819	0.0015273	0.280453	1.46777e-05	-0.982162	1.36328	0.523639				Wang et al., 2015
Anshan, NCC		layered migmatite	C209-1-@43	3779.1	3819	0.000480596	0.280402	1.83662e-05	0.765377	2.28971	0.65523				Wang et al., 2015
Anshan, NCC		layered migmatite	C209-1-@46	3674.18	3819	0.000810146	0.280373	1.17722e-05	-3.52563	0.414435	0.419984				Wang et al., 2015
Anshan, NCC		massive to weakly-banded trondhjemitic gneiss	C209-8(1)-@1	3706.03	3814	0.00108633	0.280566	2.67612e-05	3.38664	6.45448	0.954718	3.22272	0.484002	11.2054	Wang et al., 2015
Anshan, NCC		trondhjemitic gneiss	C209-8(1)-@2	3695.04	3814	0.000618863	0.280456	2.15618e-05	0.404685	3.76317	0.769227				Wang et al., 2015
Anshan, NCC		trondhjemitic gneiss	C209-8(1)-@4	3765.25	3814	0.00137479	0.280411	2.58223e-05	-1.54444	0.153923	0.92122				Wang et al., 2015
Anshan, NCC		trondhjemitic gneiss	C209-8(1)-@5	3793.61	3814	0.000992857	0.280376	2.84855e-05	-1.14006	-0.0811996	1.01623				Wang et al., 2015
Anshan, NCC		trondhjemitic gneiss	C209-8(1)-@5	3828.9	3814	0.00120683	0.280459	2.84383e-05	2.05656	2.30503	1.01455				Wang et al., 2015
Anshan, NCC		trondhjemitic gneiss	C209-8(1)-@6	3680.6	3814	0.000687923	0.280441	2.50887e-05	-0.636998	3.05029	0.89505				Wang et al., 2015
Anshan, NCC		trondhjemitic gneiss	C209-8(1)-@7	3677.44	3814	0.000761387	0.280434	2.64424e-05	-1.17637	2.57676	0.943345				Wang et al., 2015
Anshan, NCC		trondhjemitic gneiss	C209-8(1)-@9	3540.54	3814	0.000933261	0.28044	2.88078e-05	-4.54527	2.3358	1.02773				Wang et al., 2015
Anshan, NCC		trondhjemitic gneiss	C209-8(1)-@10	3811.08	3814	0.00128252	0.280425	2.70315e-05	0.248837	0.904863	0.964359				Wang et al., 2015
Anshan, NCC		trondhjemitic gneiss	C209-8(1)-@10	3780.3	3814	0.00102106	0.280467	3.41822e-05	1.72337	3.08838	1.21946				Wang et al., 2015
Anshan, NCC		trondhjemitic gneiss	C209-8(1)-@11	3761.56	3814	0.000517116	0.280382	2.45214e-05	-0.43244	1.3821	0.874809				Wang et al., 2015
Anshan, NCC		trondhjemitic gneiss	C209-8(1)-@12	3802.18	3814	0.000666584	0.280543	2.70985e-05	5.86478	6.72961	0.966751				Wang et al., 2015
Anshan, NCC		trondhjemitic gneiss	C209-8(1)-@12	3829.3	3814	0.000831032	0.28041	4.08397e-05	1.32237	1.55756	1.45697				Wang et al., 2015
Anshan, NCC		trondhjemitic gneiss	C209-8(1)-@13	3683.65	3814	0.000966676	0.280418	2.48244e-05	-2.09299	1.49702	0.885619				Wang et al., 2015
Anshan, NCC		trondhjemitic gneiss	C209-8(1)-@14	3829.86	3814	0.000804706	0.280391	2.30593e-05	0.735152	0.957046	0.82265				Wang et al., 2015
Anshan, NCC		trondhjemitic gneiss	C209-8(1)-@15	3776.05	3814	0.000899984	0.280497	3.66396e-05	3.00119	4.46735	1.30713				Wang et al., 2015
Anshan, NCC		trondhjemitic gneiss	C209-8(1)-@17	3708.99	3814	0.000929677	0.280429	2.65135e-05	-1.04352	1.96684	0.94588				Wang et al., 2015
Anshan, NCC		trondhjemitic gneiss	C209-8(1)-@18	3531.68	3814	0.0014101	0.280525	2.53712e-05	-2.86643	4.12311	0.905126				Wang et al., 2015
Anshan, NCC		trondhjemitic gneiss	C209-8(1)-@19	3574.79	3814	0.00113057	0.280589	2.74598e-05	1.06674	7.13123	0.97964				Wang et al., 2015
Anshan, NCC		trondhjemitic gneiss	C209-8(1)-@1e	3816.7	3814	0.00177308	0.28056	3.77626e-05	3.8765	4.40543	1.3472				Wang et al., 2015
Anshan, NCC		trondhjemitic gneiss	C209-8(1)-@20	3430.92	3814	0.00104193	0.280403	3.13557e-05	-8.60509	0.755464	1.11863				Wang et al., 2015
Anshan, NCC		trondhjemitic gneiss	C209-8(1)-@21	3740.24	3814	0.00126445	0.280448	3.17694e-05	-0.503028	1.76983	1.13339				Wang et al., 2015
Anshan, NCC		trondhjemitic gneiss	C209-8(1)-@22	3801	3814	0.000929689	0.280553	3.30996e-05	5.50629	6.39631	1.18084				Wang et al., 2015
Anshan, NCC		trondhjemitic gneiss	C209-8(1)-@23	3530.42	3814	0.000571943	0.280444	2.34208e-05	-3.73799	3.44892	0.835545				Wang et al., 2015
Anshan, NCC		trondhjemitic gneiss	C209-8(1)-@23	3510.7	3814	0.000377833	0.280436	3.22955e-05	-4.0277	3.65842	1.15216				Wang et al., 2015
Anshan, NCC		trondhjemitic gneiss	C209-8(1)-@25	3804.43	3814	0.000896099	0.280375	3.00241e-05	-0.689607	0.120912	1.07112				Wang et al., 2015
Anshan, NCC		trondhjemitic gneiss	C209-8(1)-@27	3814.48	3814	0.00150788	0.280533	3.34276e-05	3.57546	4.15416	1.19254				Wang et al., 2015
Anshan, NCC		trondhjemitic gneiss	C209-8(1)-@28	3700.79	3814	0.00153528	0.280469	2.36848e-05	-1.33772	1.81254	0.844966				Wang et al., 2015
Anshan, NCC		trondhjemitic gneiss	C209-8(1)-@30	3785.94	3814	0.000724211	0.280552	3.13127e-05	5.64764	6.88929	1.11709				Wang et al., 2015
Anshan, NCC		trondhjemitic gneiss	C209-8(1)-@31-1	3800	3814	0.00113565	0.280518	2.17654e-05	3.69085	4.60165	0.77649				Wang et al., 2015
Anshan, NCC		trondhjemitic gneiss	C209-8(1)-@31-2	3781.77	3814	0.000987786	0.280425	2.73765e-05	0.354927	1.68681	0.976668				Wang et al., 2015
Anshan, NCC		trondhjemitic gneiss	C209-8(1)-@31-3	3789.91	3814	0.000909565	0.280466	2.62363e-05	2.20321	3.3491	0.935992				Wang et al., 2015
Anshan, NCC		trondhjemitic gneiss	C209-8(1)-@33	3769.54	3814	0.00138598	0.280382	2.94945e-05	-2.51516	-0.91492	1.05223				Wang et al., 2015
Anshan, NCC		trondhjemitic gneiss	C209-8(1)-@34-1	3766.86	3814	0.00103189	0.280404	2.74179e-05	-0.854067	0.819192	0.978146				Wang et al., 2015
Anshan, NCC		trondhjemitic gneiss	C209-8(1)-@34-2	3783.45	3814	0.000937115	0.280403	2.37002e-05	-0.267623	1.02642	0.845514				Wang et al., 2015
Anshan, NCC		trondhjemitic gneiss	C209-8(1)-@35	3692.09	3814	0.000992613	0.280598	2.88237e-05	4.42782	7.82375	1.0283				Wang et al., 2015
Anshan, NCC		trondhjemitic gneiss	C209-8(1)-@37-1	3795.44	3814	0.000909763	0.280407	2.38223e-05	0.23351	1.25154	0.849869				Wang et al., 2015
Anshan, NCC		trondhjemitic gneiss	C209-8(1)-@37-2	3816.12	3814	0.00102404	0.280396	2.46072e-05	-0.00808049	0.532542	0.877872				Wang et al., 2015
Anshan, NCC		trondhjemitic gneiss	C209-8(1)-@38	3690.99	3814	0.000714043	0.280352	3.38763e-05	-3.65796	-0.214972	1.20855				Wang et al., 2015
Anshan, NCC		trondhjemitic gneiss	C209-8(1)-@39-1	3797.05	3814	0.000859006	0.280471	1.93969e-05	2.68188	3.66354	0.691994				Wang et al., 2015
Anshan, NCC		trondhjemitic gneiss	C209-8(1)-@39-2	3806.65	3814	0.000977874	0.280522	2.09451e-05	4.40075	5.15997	0.747226				Wang et al., 2015
Anshan, NCC		trondhjemitic gneiss	C209-8(1)-@39-2	3782.6	3814	0.00142034	0.280541	3.10398e-05	4.04882	4.68395	1.10736				Wang et al., 2015
Anshan, NCC		trondhjemitic gneiss	C209-8(1)-@41	3660.56	3814	0.000960114	0.280598	2.12509e-05	3.78931	7.91336	0.758133				Wang et al., 2015
Anshan, NCC		trondhjemitic gneiss	C209-8(1)-@41	3802.3	3814	0.000968903	0.280433	2.75895e-05	1.1451	2.0043	0.984265				Wang et al., 2015
Anshan, NCC		trondhjemitic gneiss	C209-8(1)-@42	3761.69	3814	0.000897592	0.280439	2.50459e-05	0.618585	2.41608	0.893524				Wang et al., 2015
Anshan, NCC		trondhjemitic gneiss	C209-8(1)-@43	3764.04	3814	0.00101955	0.280398	3.09666e-05	-1.09516	0.643351	1.10474				Wang et al., 2015
Anshan, NCC		trondhjemitic gneiss	C209-8(1)-@45	3528.14	3814	0.000888047	0.280459	2.4895e-05	-4.04265	3.13244	0.888137				Wang et al., 2015
Anshan, NCC		trondhjemitic gneiss	C209-8(1)-@46	3749.33	3814	0.00118972	0.280465	2.72101e-05	0.514664	2.58398	0.970732				Wang et al., 2015
Anshan, NCC		trondhjemitic gneiss	C209-8(1)-@49	3814.85	3814	0.00105174	0.280393	2.93369e-05	-0.210465	0.359407	1.04661				Wang et al., 2015
Anshan, NCC		trondhjemitic gneiss	C209-8(1)-@49	3625.1	3814	0.000421775	0.280379	3.37513e-05	-3.49807	1.51026	1.20409				Wang et al., 2015
Anshan, NCC		trondhjemitic gneiss	C209-8(1)-@50-1	3807.64	3814	0.000912816	0.280409	2.51765e-05	0.560284	1.29666	0.898183				Wang et al., 2015
Anshan, NCC		trondhjemitic gneiss	C209-8(1)-@51	3767.71	3814	0.00106014	0.28035	3.06583e-05	-2.85686	-1.20433	1.09375				Wang et al., 2015
Anshan, NCC		trondhjemitic gneiss	C209-8(1)-@52	3815.77	3814	0.000920947	0.280562	2.03994e-05	6.19044	6.73937	0.727756				Wang et al., 2015
Anshan, NCC		trondhjemitic gneiss	C209-8(1)-@52	3793	3814	0.00139129	0.280541	4.56744e-05	5	4.74887	1.62945				Wang et al., 2015
Anshan, NCC		trondhjemitic gneiss	C209-8(1)-@53	3811.19	3814	0.000623163	0.280449	3.42593e-05	2.81814	3.47312	1.22221				Wang et al., 2015
Anshan, NCC		trondhjemitic gneiss	C209-8(1)-@53	3775.2	3814	0.000539929	0.280463	2.94101e-05	2.71129	4.20712	1.04922				Wang et al., 2015
Anshan, NCC		trondhjemitic gneiss	C209-8(1)-@54-1	3630.03	3814	0.00114086	0.28046	2.77118e-05	-2.29165	2.50771	0.988629				Wang et al., 2015
Anshan, NCC		trondhjemitic gneiss	C209-8(1)-@55	3813.11	3814	0.00108985	0.280403	2.52679e-05	0.0211852	0.631007	0.901441				Wang et al., 2015
Anshan, NCC		trondhjemitic gneiss	C209-8(1)-@55	3600.3	3814	0.000992352	0.280554	2.82789e-05	0.754887	6.2576	1.00886				Wang et al., 2015
Anshan, NCC		trondhjemitic gneiss	C209-8(1)-@56	3775.17	3814	0.00128773	0.280387	2.47424e-05	-1.93949	-0.464392	0.882696				Wang et al., 2015
Anshan, NCC		trondhjemitic gneiss	C209-8(1)-@57	3741.72	3814	0.00096909	0.280455	2.66691e-05	0.541869	2.79649	0.95143				Wang et al., 2015
Anshan, NCC		trondhjemitic gneiss	C209-8(1)-@59	3746.17	3814	0.000832251	0.280507	2.2529e-05	2.85237	5.01167	0.803729				Wang et al., 2015
Anshan, NCC		trondhjemitic gneiss	C209-8(1)-@60-1	3817.79	3814	0.000910043	0.280463	2.39455e-05	2.73602	3.23814	0.854265				Wang et al., 2015
Anshan, NCC		trondhjemitic gneiss	C209-8(1)-@60-2	3778.43	3814	0.00076991	0.280411	2.45902e-05	0.338497	1.75279	0.877267				Wang et al., 2015
Anshan, NCC		trondhjemitic gneiss	C209-8(1)-@61	3796.32	3814	0.000789966	0.280498	2.40891e-05	3.78162	4.78122	0.85939				Wang et al., 2015
Anshan, NCC		trondhjemitic gneiss	C209-8(1)-@62	3817.21	3814	0.00127488	0.280451	2.27083e-05	1.31562	1.8317	0.810129				Wang et al., 2015
Anshan, NCC		trondhjemitic gneiss	C209-8(1)-@62	3751.1	3814	0.000939121	0.28046	2.37318e-05	1.02266	3.06276	0.846642				Wang et al., 2015
Anshan, NCC		trondhjemitic gneiss	C209-8(1)-@63	3777.74	3814	0.00133609	0.280487	2.32956e-05	1.55047	2.96613	0.831079				Wang et al., 2015
Anshan, NCC		trondhjemitic gneiss	C209-8(1)-@63	3785.3	3814	0.00115027	0.280517	2.6201e-05	3.26275	4.51028	0.934731				Wang et al., 2015
Anshan, NCC		trondhjemitic gneiss	C209-8(1)-@64	3812.72	3814	0.00113793	0.280407	2.42792e-05	0.0129953	0.631763	0.866169				Wang et al., 2015
Anshan, NCC		trondhjemitic gneiss	C209-8(1)-@65	3703.11	3814	0.000900363	0.280471	2.10628e-05	0.382662	3.53114	0.751424				Wang et al., 2015
Anshan, NCC		trondhjemitic gneiss	C209-8(1)-@66	3612.07	3814	0.000713972	0.280638	2.16839e-05	4.72627	10.0011	0.773582				Wang et al., 2015
Anshan, NCC		trondhjemitic gneiss	C209-8(1)-@68	3698.74	3814	0.00115679	0.280504	2.51068e-05	0.809055	4.03741	0.895697				Wang et al., 2015
Anshan, NCC		trondhjemitic gneiss	C209-8(1)-@69	3646.78	3814	0.00115679	0.280504	2.51068e-05	0.809055	4.03741	0.895697				Wang et al., 2015
Anshan, NCC		trondhjemitic gneiss	C209-8(1)-@69	3584.4	3814	0.000787131	0.280549	2.25266e-05	0.734273	6.63538	0.803646				Wang et al., 2015
Anshan, NCC		massive trondhjemitic gneiss	C209-8(3)-@1e	3817.3	3814	0.00144882	0.280486	4.02104e-05	2.10775	2.62227	1.43452				Wang et al., 2015
Anshan, NCC		massive trondhjemitic gneiss	C209-8(3)-@11	3544.96	3814	0.00115622	0.280466	2.24517e-05	-4.0548	2.68226	0.800974				Wang et al., 2015
Anshan, NCC		massive trondhjemitic gneiss	C209-8(3)-@12	3629.14	3814	0.00123705	0.280548	2.3354e-05	0.602989	5.41136	0.833163				Wang et al., 2015
Anshan, NCC		massive trondhjemitic gneiss	C209-8(3)-@12	3578.6	3814	0.00141044	0.28055	4.19804e-05	-0.918493	5.01077	1.49767				Wang et al., 2015
Anshan, NCC		massive trondhjemitic gneiss	C209-8(3)-@14	3778.72	3814	0.00115307	0.280449	2.5591e-05	0.70644	2.10428	0.912968				Wang et al., 2015
Anshan, NCC		massive trondhjemitic gneiss	C209-8(3)-@16	3690.08	3814	0.0008529	0.280532	3.0107e-05	2.40147	5.85537	1.07408				Wang et al., 2015
Anshan, NCC		massive trondhjemitic gneiss	C209-8(3)-@18	3704.07	3814	0.000816176	0.280489	2.61337e-05	1.29087	4.4243	0.932331				Wang et al., 2015
Anshan, NCC		massive trondhjemitic gneiss	C209-8(3)-@19	3681.44	3814	0.000884135	0.280536	2.92138e-05	2.25005	5.90026	1.04221				Wang et al., 2015
Anshan, NCC		massive trondhjemitic gneiss	C209-8(3)-@3	3769.64	3814	0.0010288	0.280548	3.10717e-05	4.33181	5.94227	1.1085				Wang et al., 2015
Anshan, NCC		massive trondhjemitic gneiss	C209-8(3)-@5	3528.71	3814	0.0012753	0.280418	2.31123e-05	-6.41018	0.671195	0.82454				Wang et al., 2015
Anshan, NCC		massive trondhjemitic gneiss	C209-8(3)-@7	3558.8	3814	0.000902567	0.280519	2.3636e-05	-1.20181	5.26775	0.843223				Wang et al., 2015
Anshan, NCC		massive trondhjemitic gneiss	C209-8(3)-@7	3711.6	3814	0.00109088	0.280541	4.14585e-05	2.60224	5.54181	1.47905				Wang et al., 2015
Anshan, NCC		massive trondhjemitic gneiss	C209-8(3)-@8	3732.47	3814	0.000834694	0.280401	2.08364e-05	-1.27124	1.2037	0.743347				Wang et al., 2015
Anshan, NCC		massive trondhjemitic gneiss	C209-8(3)-@9	3774.05	3814	0.00114881	0.28054	2.37159e-05	3.85441	5.35995	0.846075				Wang et al., 2015
Anshan, NCC		trondhjemitic gneiss	A0405-01	3573	3573	0.002138	0.2804	2.4e-05	-8.16	-7.65333	0.855715	0.862793	1.21413	15.2034	Liu et al., 2008
Anshan, NCC		trondhjemitic gneiss	A0405-02	3573	3573	0.000813	0.280461	2.3e-05	-2.74	-2.21944	0.82006				Liu et al., 2008
Anshan, NCC		trondhjemitic gneiss	A0405-03	3573	3573	0.002348	0.280613	2.3e-05	-1.1	-0.57537	0.82006				Liu et al., 2008
Anshan, NCC		trondhjemitic gneiss	A0405-04	3573	3573	0.002037	0.280513	3.1e-05	-3.89	-3.37592	1.1053				Liu et al., 2008
Anshan, NCC		trondhjemitic gneiss	A0405-05	3573	3573	0.002255	0.280695	1.8e-05	2.05	2.57706	0.641786				Liu et al., 2008
Anshan, NCC		trondhjemitic gneiss	A0405-06	3573	3573	0.000782	0.280409	2.6e-05	-4.52	-3.99724	0.927025				Liu et al., 2008
Anshan, NCC		trondhjemitic gneiss	A0405-07	3573	3573	0.001876	0.280615	2.3e-05	0.15	0.656862	0.82006				Liu et al., 2008
Anshan, NCC		trondhjemitic gneiss	A0405-08	3573	3573	0.001537	0.280641	2.1e-05	1.91	2.41769	0.748751				Liu et al., 2008
Anshan, NCC		trondhjemitic gneiss	A0405-09	3573	3573	0.001218	0.280503	2e-05	-2.23	-1.71807	0.713096				Liu et al., 2008
Anshan, NCC		trondhjemitic gneiss	A0405-10	3573	3573	0.001388	0.280643	2.4e-05	2.33	2.85547	0.855715				Liu et al., 2008
Anshan, NCC		trondhjemitic gneiss	A0405-11	3573	3573	0.000249	0.280489	2.6e-05	-0.35	0.166097	0.927025				Liu et al., 2008
Anshan, NCC		trondhjemitic gneiss	A0405-12	3573	3573	0.001435	0.280558	2.5e-05	-0.82	-0.290786	0.89137				Liu et al., 2008
Anshan, NCC		trondhjemitic gneiss	A0405-13	3573	3573	0.001966	0.280582	2.4e-05	-1.27	-0.741109	0.855715				Liu et al., 2008
Anshan, NCC		trondhjemitic gneiss	A0405-14	3573	3573	0.002567	0.280856	2.2e-05	7.02	7.5501	0.784406				Liu et al., 2008
Anshan, NCC		trondhjemitic gneiss	A0405-15	3573	3573	0.005069	0.280959	2.4e-05	4.54	5.06867	0.855715				Liu et al., 2008
Anshan, NCC		trondhjemitic gneiss	A0405-16	3573	3573	0.000235	0.280471	2.6e-05	-0.95	-0.441255	0.927025				Liu et al., 2008
Anshan, NCC		trondhjemitic gneiss	A0405-17	3573	3573	0.00129	0.280617	2.2e-05	1.64	2.16949	0.784406				Liu et al., 2008
Anshan, NCC		trondhjemitic gneiss	A0405-18	3573	3573	0.001222	0.28056	2.5e-05	-0.22	0.304415	0.89137				Liu et al., 2008
Anshan, NCC		trondhjemitic gneiss	A0405-19	3573	3573	0.001209	0.280621	2.6e-05	1.99	2.51133	0.927025				Liu et al., 2008
Anshan, NCC		trondhjemitic gneiss	A0405-20	3573	3573	0.001188	0.280579	2.6e-05	0.53	1.06548	0.927025				Liu et al., 2008
Anshan, NCC		trondhjemitic gneiss	A0405-21	3573	3573	0.001144	0.280568	2.3e-05	0.25	0.7815	0.82006				Liu et al., 2008
Anshan, NCC		trondhjemitic gneiss	A0405-22	3573	3573	0.002375	0.280716	2.1e-05	2.49	3.03067	0.748751				Liu et al., 2008
Anshan, NCC		trondhjemitic gneiss	A0405-23	3573	3573	0.0017	0.280588	2.7e-05	-0.39	0.127069	0.96268				Liu et al., 2008
Anshan, NCC		trondhjemitic gneiss	A0405-24	3573	3573	0.001545	0.280759	3.4e-05	6.08	6.60527	1.21226				Liu et al., 2008
Anshan, NCC		trondhjemitic gneiss	A0405-25	3573	3573	0.001316	0.280603	3.1e-05	1.07	1.60637	1.1053				Liu et al., 2008
Anshan, NCC		trondhjemitic gneiss	A0405-26	3573	3573	0.001659	0.280624	2.2e-05	1	1.51148	0.784406				Liu et al., 2008
Anshan, NCC		trondhjemitic gneiss	A0405-27	3573	3573	0.001631	0.280431	1.9e-05	-5.83	-5.30102	0.677441				Liu et al., 2008
Anshan, NCC		trondhjemitic gneiss	A0405-28	3573	3573	0.001577	0.280672	2.2e-05	2.91	3.4246	0.784406				Liu et al., 2008
Anshan, NCC		trondhjemitic gneiss	A0405-29	3573	3573	0.002191	0.280765	2.5e-05	4.71	5.23031	0.89137				Liu et al., 2008
Anshan, NCC		trondhjemitic gneiss	A0405-30	3573	3573	0.002764	0.280729	2.2e-05	2.03	2.5374	0.784406				Liu et al., 2008
Anshan, NCC		trondhjemitic gneiss	A0403-01	3723	3723	0.001484	0.280799	6e-05	11.05	11.6185	2.14006	3.02276	1.64944	18.573	Liu et al., 2008
Anshan, NCC		trondhjemitic gneiss	A0403-02	3723	3723	0.003038	0.280507	2.3e-05	-3.36	-2.78615	0.820355				Liu et al., 2008
Anshan, NCC		trondhjemitic gneiss	A0403-03	3723	3723	0.001969	0.280505	3.7e-05	-0.86	-0.112944	1.3197				Liu et al., 2008
Anshan, NCC		trondhjemitic gneiss	A0403-04	3723	3723	0.002718	0.280804	3.7e-05	8.06	8.62869	1.3197				Liu et al., 2008
Anshan, NCC		trondhjemitic gneiss	A0403-05	3723	3723	0.001195	0.280471	1.8e-05	-8.67	0.661519	0.642017				Liu et al., 2008
Anshan, NCC		trondhjemitic gneiss	A0403-06	3723	3723	0.001374	0.280659	6.1e-05	6.36	6.90747	2.17572				Liu et al., 2008
Anshan, NCC		trondhjemitic gneiss	A0404-01	3620	3620	0.001026	0.28042	2.3e-05	-3.65	-3.11561	0.820153				Liu et al., 2008
Anshan, NCC		trondhjemitic gneiss	A0404-02	3620	3620	0.003077	0.280615	2.3e-05	-1.82	-1.27595	0.820153				Liu et al., 2008
Anshan, NCC		trondhjemitic gneiss	A0404-03	3620	3620	0.000977	0.280615	2.3e-05	3.41	3.96003	0.820153				Liu et al., 2008
Anshan, NCC		trondhjemitic gneiss	A0404-04	3620	3620	0.001075	0.280384	2.4e-05	-5.05	-4.5215	0.855811				Liu et al., 2008
Anshan, NCC		trondhjemitic gneiss	A0404-05	3620	3620	0.002014	0.280534	5.3e-05	-2.03	-1.51391	1.88992				Liu et al., 2008
Anshan, NCC		trondhjemitic gneiss	A0404-07	3620	3620	0.001039	0.280564	3.5e-05	1.44	1.98684	1.24806				Liu et al., 2008
Anshan, NCC		trondhjemitic gneiss	A0404-06	3620	3620	0.001275	0.280661	4e-05	4.31	4.85732	1.42635				Liu et al., 2008
Anshan, NCC		trondhjemitic gneiss	A0404-08	3620	3620	0.002769	0.280879	2.2e-05	8.36	8.90592	0.784494				Liu et al., 2008
Anshan, NCC		trondhjemitic gneiss	A0404-09	3620	3620	0.001943	0.280585	3.2e-05	-0.06	0.481713	1.14108				Liu et al., 2008
Anshan, NCC		trondhjemitic gneiss	A0404-10	3620	3620	0.001137	0.280505	2.3e-05	-0.88	-0.361374	0.820153				Liu et al., 2008
Anshan, NCC		trondhjemitic gneiss	A0404-11	3620	3620	0.00093	0.280637	3.3e-05	4.32	4.86171	1.17674				Liu et al., 2008
Anshan, NCC		trondhjemitic gneiss	A0404-12	3620	3620	0.001152	0.280505	2.4e-05	-0.95	-0.398774	0.855811				Liu et al., 2008
Anshan, NCC		trondhjemitic gneiss	A0404-13	3620	3620	0.001054	0.280722	2.6e-05	7.06	7.58353	0.927129				Liu et al., 2008
Anshan, NCC		trondhjemitic gneiss	A0404-14	3620	3620	0.001878	0.280961	3.3e-05	13.51	14.0515	1.17674				Liu et al., 2008
Anshan, NCC		trondhjemitic gneiss	A0404-15	3620	3620	0.001728	0.280773	2e-05	7.18	7.72163	0.713176				Liu et al., 2008
Anshan, NCC		trondhjemitic gneiss	A0404-16	3620	3620	0.000722	0.280505	2.7e-05	0.14	0.673354	0.962788				Liu et al., 2008
Anshan, NCC		trondhjemitic gneiss	A0404-17	3620	3620	0.001829	0.280692	3.9e-05	4.06	4.58144	1.39069				Liu et al., 2008
Anshan, NCC		trondhjemitic gneiss	A0404-18	3620	3620	0.001172	0.280428	3.1e-05	-3.71	-3.19437	1.10542				Liu et al., 2008
Anshan, NCC		trondhjemitic gneiss	A0404-19	3620	3620	0.002147	0.280503	2.3e-05	-3.5	-2.95095	0.820153				Liu et al., 2008
Anshan, NCC		trondhjemitic gneiss	A0404-20	3620	3620	0.002663	0.280848	2.4e-05	7.53	8.06479	0.855811				Liu et al., 2008
Anshan, NCC		trondhjemitic gneiss	A0404-21	3620	3620	0.001782	0.280439	2.2e-05	-4.84	-4.32305	0.784494				Liu et al., 2008
Anshan, NCC		trondhjemitic gneiss	A0404-22	3620	3620	0.000637	0.280475	3.2e-05	-0.71	-0.184478	1.14108				Liu et al., 2008
Anshan, NCC		trondhjemitic gneiss	A0404-23	3620	3620	0.002256	0.280876	2.8e-05	9.54	10.078	0.998447				Liu et al., 2008
Anshan, NCC		trondhjemitic gneiss	A0404-24	3620	3620	0.00132	0.280767	1.7e-05	7.98	8.52496	0.6062				Liu et al., 2008
Anshan, NCC		trondhjemitic gneiss	A0404-25	3620	3620	0.002426	0.280808	2e-05	6.71	7.22935	0.713176				Liu et al., 2008
Anshan, NCC		trondhjemitic gneiss	A0404-26	3620	3620	0.000552	0.280404	1.7e-05	-3.04	-2.50432	0.6062				Liu et al., 2008
Anshan, NCC		trondhjemitic gneiss	A0404-27	3620	3620	0.0009	0.280513	1.8e-05	-0.02	0.514813	0.641859				Liu et al., 2008
Anshan, NCC		trondhjemitic gneiss	A0404-28	3620	3620	0.001449	0.280645	1.9e-05	3.32	3.85294	0.677517				Liu et al., 2008
Anshan, NCC		trondhjemitic gneiss	A0404-29	3620	3620	0.00106	0.280656	1.6e-05	4.69	5.21509	0.570541				Liu et al., 2008
Anshan, NCC		trondhjemitic gneiss	A0404-30	3620	3620	0.001649	0.280694	2e-05	4.56	5.10156	0.713176				Liu et al., 2008
Anshan, NCC		trondhjemitic gneiss	A0423-01	3687	3687	0.000903	0.280417	4e-05	-1.91	-1.35472	1.42658	-0.105891	1.05796	12.9188	Liu et al., 2008
Anshan, NCC		trondhjemitic gneiss	A0423-02	3687	3687	0.001457	0.2806	4.6e-05	3.19	3.76391	1.64057				Liu et al., 2008
Anshan, NCC		trondhjemitic gneiss	A0423-03	3687	3687	0.000911	0.280429	3.5e-05	-1.49	-0.947075	1.24826				Liu et al., 2008
Anshan, NCC		trondhjemitic gneiss	A0423-04	3687	3687	0.00077	0.280554	4.3e-05	3.32	3.86934	1.53357				Liu et al., 2008
Anshan, NCC		trondhjemitic gneiss	A0423-05	3687	3687	0.000534	0.280444	3.4e-05	0.01	0.546032	1.21259				Liu et al., 2008
Anshan, NCC		trondhjemitic gneiss	A0423-06	3687	3687	0.001315	0.280554	4.3e-05	1.95	2.48423	1.53357				Liu et al., 2008
Anshan, NCC		trondhjemitic gneiss	A0423-07	3687	3687	0.000931	0.280491	4.3e-05	0.68	1.2133	1.53357				Liu et al., 2008
Anshan, NCC		trondhjemitic gneiss	A0423-08	3687	3687	0.000863	0.280407	4.5e-05	-2.16	-1.6097	1.6049				Liu et al., 2008
Anshan, NCC		trondhjemitic gneiss	A0423-09	3687	3687	0.000861	0.28036	4.4e-05	-3.84	-3.28085	1.56924				Liu et al., 2008
Anshan, NCC		trondhjemitic gneiss	A0423-10	3687	3687	0.00106	0.28035	4.5e-05	-4.69	-4.14325	1.6049				Liu et al., 2008
Anshan, NCC		trondhjemitic gneiss	A0423-11	3687	3687	0.00053	0.280351	3.4e-05	-3.33	-2.7606	1.21259				Liu et al., 2008
Anshan, NCC		trondhjemitic gneiss	A0423-12	3687	3687	0.000985	0.280436	3.3e-05	-1.44	-0.885493	1.17693				Liu et al., 2008
Anshan, NCC		trondhjemitic gneiss	A0423-13	3687	3687	0.001215	0.280591	5.3e-05	3.52	4.05797	1.89022				Liu et al., 2008
Anshan, NCC		trondhjemitic gneiss	A0423-14	3687	3687	0.00136	0.280486	5.6e-05	-0.61	-0.055323	1.99721				Liu et al., 2008
Anshan, NCC		trondhjemitic gneiss	A0423-15	3687	3687	0.00075	0.280383	4.1e-05	-2.75	-2.17846	1.46225				Liu et al., 2008
Anshan, NCC		trondhjemitic gneiss	A0423-16	3687	3687	0.000891	0.280497	4.1e-05	0.98	1.52894	1.46225				Liu et al., 2008
Anshan, NCC		trondhjemitic gneiss	A0423-17	3687	3687	0.000899	0.280382	3.7e-05	-3.14	-2.59281	1.31959				Liu et al., 2008
Anshan, NCC		trondhjemitic gneiss	A0423-18	3687	3687	0.000941	0.28062	4e-05	5.23	5.78861	1.42658				Liu et al., 2008
Anshan, NCC		trondhjemitic gneiss	A0423-19	3687	3687	0.002219	0.280372	3.7e-05	-6.87	-6.30421	1.31959				Liu et al., 2008
Anshan, NCC		trondhjemitic gneiss	A0423-20	3687	3687	0.000894	0.280424	4.1e-05	-1.63	-1.08219	1.46225				Liu et al., 2008
Anshan, NCC		trondhjemitic gneiss	A0423-21	3687	3687	0.00105	0.280445	3.7e-05	-1.29	-0.729709	1.31959				Liu et al., 2008
Anshan, NCC		trondhjemitic gneiss	A0423-22	3687	3687	0.001266	0.280331	4.2e-05	-5.91	-5.34443	1.49791				Liu et al., 2008
Anshan, NCC		trondhjemitic gneiss	A0423-23	3687	3687	0.001338	0.280493	4.4e-05	-0.32	0.250241	1.56924				Liu et al., 2008
Anshan, NCC		trondhjemitic gneiss	A0423-24	3687	3687	0.000812	0.28046	3.1e-05	-0.14	0.410132	1.1056				Liu et al., 2008
Anshan, NCC		trondhjemitic gneiss	A0423-25	3687	3687	0.000783	0.280468	4.1e-05	0.21	0.769151	1.46225				Liu et al., 2008
Anshan, NCC		trondhjemitic gneiss	A0423-26	3687	3687	0.000804	0.280497	3.9e-05	1.2	1.75005	1.39092				Liu et al., 2008
Anshan, NCC		trondhjemitic gneiss	A0423-27	3687	3687	0.000909	0.280383	3.9e-05	-3.13	-2.58256	1.39092				Liu et al., 2008
Anshan, NCC		trondhjemitic gneiss	A0423-28	3687	3687	0.000616	0.28062	2.8e-05	6.05	6.61459	0.998607				Liu et al., 2008
Anshan, NCC		trondhjemitic gneiss	A0423-29	3687	3687	0.000617	0.28045	4.1e-05	0.01	0.549076	1.46225				Liu et al., 2008
Anshan, NCC		trondhjemitic gneiss	A0423-30	3687	3687	0.000839	0.280455	4.3e-05	-0.39	0.16319	1.53357				Liu et al., 2008
Anshan, NCC		trondhjemitic gneiss	A0423-31	3687	3687	0.000772	0.280365	3.7e-05	-3.44	-2.87634	1.31959				Liu et al., 2008
Anshan, NCC		trondhjemitic gneiss	A0423-32	3687	3687	0.000562	0.280475	5.2e-05	1.03	1.58047	1.85456				Liu et al., 2008
Anshan, NCC		quartz dioritic gneiss	A9604-01	3792	3792	0.00148	0.280395	2.5e-05	-1.77	-1.19802	0.891838	0.768825	0.844794	8.61659	Liu et al., 2008
Anshan, NCC		quartz dioritic gneiss	A9604-02	3792	3792	0.003156	0.280571	2.8e-05	0.12	0.694238	0.998858				Liu et al., 2008
Anshan, NCC		quartz dioritic gneiss	A9604-03	3792	3792	0.001048	0.280419	2e-05	0.2	0.788739	0.71347				Liu et al., 2008
Anshan, NCC		quartz dioritic gneiss	A9604-04	3792	3792	0.002135	0.280489	2.3e-05	-0.16	0.441082	0.820491				Liu et al., 2008
Anshan, NCC		quartz dioritic gneiss	A9604-05	3792	3792	0.003567	0.280602	2.8e-05	0.13	0.724483	0.998858				Liu et al., 2008
Anshan, NCC		quartz dioritic gneiss	A9604-06	3792	3792	0.000725	0.280413	2.4e-05	0.85	1.42003	0.856164				Liu et al., 2008
Anshan, NCC		quartz dioritic gneiss	A9604-07	3792	3792	0.000492	0.280428	3.2e-05	1.97	2.56492	1.14155				Liu et al., 2008
Anshan, NCC		quartz dioritic gneiss	A9604-08	3792	3792	0.000807	0.280453	2.2e-05	2.05	2.63236	0.784817				Liu et al., 2008
Anshan, NCC		quartz dioritic gneiss	A9604-09	3792	3792	0.001676	0.280446	2.5e-05	-0.47	0.108376	0.891838				Liu et al., 2008
Anshan, NCC		quartz dioritic gneiss	A9604-10	3792	3792	0.002371	0.280498	2.3e-05	-0.45	0.144505	0.820491				Liu et al., 2008
Anshan, NCC		quartz dioritic gneiss	A9604-11	3792	3792	0.002081	0.280457	2.7e-05	-1.16	-0.559146	0.963185				Liu et al., 2008
Anshan, NCC		quartz dioritic gneiss	A9604-12	3792	3792	0.001987	0.280484	3.1e-05	0.07	0.650048	1.10588				Liu et al., 2008
Anshan, NCC		quartz dioritic gneiss	A9604-13	3792	3792	0.001287	0.280446	2.6e-05	0.53	1.12643	0.927511				Liu et al., 2008
Anshan, NCC		quartz dioritic gneiss	A9604-14	3792	3792	0.00393	0.280525	3.9e-05	-3.55	-2.97239	1.39127				Liu et al., 2008
Anshan, NCC		quartz dioritic gneiss	A9604-15	3792	3792	0.000992	0.280551	2.1e-05	5.05	5.6442	0.749144				Liu et al., 2008
Anshan, NCC		quartz dioritic gneiss	A9604-16	3792	3792	0.001888	0.280414	3e-05	-2.18	-1.588	1.07021				Liu et al., 2008
Anshan, NCC		quartz dioritic gneiss	A9604-17	3792	3792	0.000392	0.280505	5.5e-05	4.98	5.57349	1.96204				Liu et al., 2008
Anshan, NCC		quartz dioritic gneiss	A9604-18	3792	3792	0.00132	0.280448	2.8e-05	0.52	1.11142	0.998858				Liu et al., 2008
Anshan, NCC		quartz dioritic gneiss	A9604-19	3792	3792	0.001173	0.280348	5.4e-05	-2.67	-2.07122	1.92637				Liu et al., 2008
Anshan, NCC		quartz dioritic gneiss	A9604-20	3792	3792	0.001272	0.280427	2.3e-05	-0.08	0.487893	0.820491				Liu et al., 2008
Anshan, NCC		quartz dioritic gneiss	A9604-21	3792	3792	0.002276	0.280477	2.2e-05	-0.94	-0.356013	0.784817				Liu et al., 2008
Anshan, NCC		quartz dioritic gneiss	A9604-22	3792	3792	0.000796	0.280421	2e-05	0.95	1.5196	0.71347				Liu et al., 2008
Anshan, NCC		quartz dioritic gneiss	A9604-23	3792	3792	0.002032	0.280463	2.3e-05	-0.79	-0.216866	0.820491				Liu et al., 2008
Anshan, NCC		quartz dioritic gneiss	A9604-24	3792	3792	0.00253	0.280464	2.6e-05	-2.06	-1.48452	0.927511				Liu et al., 2008
Anshan, NCC		quartz dioritic gneiss	A9604-25	3792	3792	0.001307	0.280529	3e-05	3.45	4.03499	1.07021				Liu et al., 2008
Anshan, NCC		trondhjemitic gneiss	A0507-01	3791	3791	0.000929	0.280741	2.3e-05	11.99	12.5637	0.820489	2.76003	1.45823	15.5831	Liu et al., 2008
Anshan, NCC		trondhjemitic gneiss	A0507-02	3791	3791	0.001209	0.280505	2.8e-05	2.84	3.41214	0.998856				Liu et al., 2008
Anshan, NCC		trondhjemitic gneiss	A0507-03	3791	3791	0.000636	0.28037	2.2e-05	-0.47	0.0954216	0.784815				Liu et al., 2008
Anshan, NCC		trondhjemitic gneiss	A0507-04	3791	3791	0.001305	0.280399	2.3e-05	-1.21	-0.620415	0.820489				Liu et al., 2008
Anshan, NCC		trondhjemitic gneiss	A0507-05	3791	3791	0.000911	0.280585	2.6e-05	6.48	7.0457	0.927509				Liu et al., 2008
Anshan, NCC		trondhjemitic gneiss	A0507-06	3791	3791	0.00046	0.280352	2.3e-05	-0.66	-0.0862151	0.820489				Liu et al., 2008
Anshan, NCC		trondhjemitic gneiss	A0507-07	3791	3791	0.001212	0.280631	2.2e-05	7.32	7.89914	0.784815				Liu et al., 2008
Anshan, NCC		trondhjemitic gneiss	A0507-08	3791	3791	0.001158	0.280801	2.3e-05	13.52	14.1049	0.820489				Liu et al., 2008
Anshan, NCC		trondhjemitic gneiss	A0507-09	3791	3791	0.000848	0.280463	2.5e-05	2.26	2.85838	0.891836				Liu et al., 2008
Anshan, NCC		trondhjemitic gneiss	A0507-10	3791	3791	0.000657	0.280406	2.3e-05	0.72	1.32472	0.820489				Liu et al., 2008
Anshan, NCC		trondhjemitic gneiss	A0507-11	3791	3791	0.00095	0.280459	2.2e-05	1.87	2.44881	0.784815				Liu et al., 2008
Anshan, NCC		trondhjemitic gneiss	A0507-12	3791	3791	0.000446	0.28046	2.2e-05	3.21	3.80314	0.784815				Liu et al., 2008
Anshan, NCC		trondhjemitic gneiss	A0507-13	3791	3791	0.000658	0.280388	2.3e-05	0.1	0.679983	0.820489				Liu et al., 2008
Anshan, NCC		trondhjemitic gneiss	A0507-14	3791	3791	0.000546	0.280438	2.6e-05	2.19	2.75669	0.927509				Liu et al., 2008
Anshan, NCC		trondhjemitic gneiss	A0507-15	3791	3791	0.001074	0.280446	2.6e-05	1.09	1.66062	0.927509				Liu et al., 2008
Anshan, NCC		trondhjemitic gneiss	A0507-16	3791	3791	0.000769	0.280547	2.5e-05	5.46	6.06164	0.891836				Liu et al., 2008
Anshan, NCC		trondhjemitic gneiss	A0507-17	3791	3791	0.000757	0.280431	2.2e-05	1.38	1.95492	0.784815				Liu et al., 2008
Anshan, NCC		trondhjemitic gneiss	A0507-18	3791	3791	0.000765	0.28039	2.9e-05	-0.13	0.471376	1.03453				Liu et al., 2008
Anshan, NCC		trondhjemitic gneiss	A0507-19	3791	3791	0.000986	0.280432	2.2e-05	0.8	1.39144	0.784815				Liu et al., 2008
Anshan, NCC		trondhjemitic gneiss	A0507-20	3791	3791	0.000574	0.280396	2.3e-05	0.6	1.18515	0.820489				Liu et al., 2008
Anshan, NCC		trondhjemitic gneiss	A0507-21	3791	3791	0.000505	0.280361	2.4e-05	-0.45	0.117108	0.856162				Liu et al., 2008
Anshan, NCC		trondhjemitic gneiss	A0507-22	3791	3791	0.000693	0.28039	2.1e-05	0.07	0.659756	0.749142				Liu et al., 2008
Anshan, NCC		trondhjemitic gneiss	A0507-23	3791	3791	0.000471	0.280418	2.8e-05	1.66	2.23945	0.998856				Liu et al., 2008
Anshan, NCC		trondhjemitic gneiss	A0507-24	3791	3791	0.001142	0.280363	2.1e-05	-2.07	-1.47819	0.749142				Liu et al., 2008
Anshan, NCC		trondhjemitic gneiss	A0507-25	3791	3791	0.000752	0.280406	3e-05	0.48	1.07616	1.0702				Liu et al., 2008
Anshan, NCC		trondhjemitic gneiss	A0507-26	3791	3791	0.000458	0.28033	2e-05	-1.44	-0.865798	0.713469				Liu et al., 2008
Anshan, NCC		trondhjemitic gneiss	A0507-27	3791	3791	0.000572	0.280412	2.2e-05	1.18	1.76115	0.784815				Liu et al., 2008
Anshan, NCC		trondhjemitic gneiss	A0512-01	3777	3777	0.000859	0.280517	2.6e-05	3.84	4.42818	0.927478	-0.544815	0.750348	12.278	Liu et al., 2008
Anshan, NCC		trondhjemitic gneiss	A0512-02	3777	3777	0.001426	0.280386	2.5e-05	-2.3	-1.72266	0.891806				Liu et al., 2008
Anshan, NCC		trondhjemitic gneiss	A0512-03	3777	3777	0.001086	0.280347	2.4e-05	-2.82	-2.22773	0.856134				Liu et al., 2008
Anshan, NCC		trondhjemitic gneiss	A0512-04	3777	3777	0.000929	0.280339	2.3e-05	-2.68	-2.10392	0.820461				Liu et al., 2008
Anshan, NCC		trondhjemitic gneiss	A0512-05	3777	3777	0.001332	0.28036	2.7e-05	-2.99	-2.40514	0.96315				Liu et al., 2008
Anshan, NCC		trondhjemitic gneiss	A0512-06	3777	3777	0.000883	0.28033	2e-05	-2.88	-2.30508	0.713445				Liu et al., 2008
Anshan, NCC		trondhjemitic gneiss	A0512-06	3777	3777	0.000885	0.28034	1.9e-05	-2.52	-1.95357	0.677772				Liu et al., 2008
Anshan, NCC		trondhjemitic gneiss	A0512-07	3777	3777	0.001027	0.280479	2e-05	2.05	2.63477	0.713445				Liu et al., 2008
Anshan, NCC		trondhjemitic gneiss	A0512-08	3777	3777	0.001768	0.280429	2.6e-05	-1.64	-1.0801	0.927478				Liu et al., 2008
Anshan, NCC		trondhjemitic gneiss	A0512-09	3777	3777	0.000962	0.280478	2.3e-05	2.2	2.76851	0.820461				Liu et al., 2008
Anshan, NCC		trondhjemitic gneiss	A0512-10	3777	3777	0.002079	0.280514	2.1e-05	0.58	1.14148	0.749117				Liu et al., 2008
Anshan, NCC		trondhjemitic gneiss	A0512-11	3777	3777	0.001979	0.280446	2.4e-05	-1.6	-1.02361	0.856134				Liu et al., 2008
Anshan, NCC		trondhjemitic gneiss	A0512-12	3777	3777	0.00094	0.280475	2.6e-05	2.12	2.71883	0.927478				Liu et al., 2008
Anshan, NCC		trondhjemitic gneiss	A0512-13	3777	3777	0.000982	0.280391	1.9e-05	-0.95	-0.3871	0.677772				Liu et al., 2008
Anshan, NCC		trondhjemitic gneiss	A0512-14	3777	3777	0.001615	0.280452	2.4e-05	-0.43	0.13912	0.856134				Liu et al., 2008
Anshan, NCC		trondhjemitic gneiss	A0512-15	3777	3777	0.001295	0.280422	3.1e-05	-0.67	-0.0970318	1.10584				Liu et al., 2008
Anshan, NCC		trondhjemitic gneiss	A0512-16	3777	3777	0.00174	0.280471	2.2e-05	-0.1	0.491105	0.784789				Liu et al., 2008
Anshan, NCC		trondhjemitic gneiss	A0512-17	3777	3777	0.001311	0.280445	2.1e-05	0.12	0.681729	0.749117				Liu et al., 2008
Anshan, NCC		trondhjemitic gneiss	A0512-18	3777	3777	0.001219	0.280445	2.1e-05	0.33	0.921508	0.749117				Liu et al., 2008
Anshan, NCC		trondhjemitic gneiss	A0512-19	3777	3777	0.001814	0.280408	2.5e-05	-2.52	-1.94911	0.891806				Liu et al., 2008
Anshan, NCC		trondhjemitic gneiss	A0512-20	3777	3777	0.00183	0.280438	2.3e-05	-1.52	-0.920645	0.820461				Liu et al., 2008
Anshan, NCC		trondhjemitic gneiss	A0512-21	3777	3777	0.002306	0.280469	2.5e-05	-1.63	-1.0554	0.891806				Liu et al., 2008
Anshan, NCC		trondhjemitic gneiss	A0512-22	3777	3777	0.001896	0.280507	2.2e-05	0.78	1.36872	0.784789				Liu et al., 2008
Anshan, NCC		trondhjemitic gneiss	A0512-23	3777	3777	0.001184	0.280369	2e-05	-2.29	-1.69836	0.713445				Liu et al., 2008
Anshan, NCC		trondhjemitic gneiss	A0512-24	3777	3777	0.000974	0.280526	2.3e-05	3.88	4.4495	0.820461				Liu et al., 2008
Anshan, NCC		trondhjemitic gneiss	A0512-25	3777	3777	0.004393	0.280557	4.1e-05	-3.95	-3.35559	1.46256				Liu et al., 2008
Anshan, NCC		trondhjemitic gneiss	A0512-26	3777	3777	0.000981	0.280408	2.1e-05	-0.34	0.221935	0.749117				Liu et al., 2008
Anshan, NCC		trondhjemitic gneiss	A0512-27	3777	3777	0.001002	0.280416	2e-05	-0.14	0.45258	0.713445				Liu et al., 2008
Anshan, NCC		trondhjemitic gneiss	A0512-28	3777	3777	0.00205	0.280447	2.4e-05	-1.75	-1.17298	0.856134				Liu et al., 2008
Anshan, NCC		trondhjemitic gneiss	A0512-29	3777	3777	0.001974	0.280363	2.6e-05	-4.57	-3.97137	0.927478				Liu et al., 2008
Anshan, NCC		trondhjemitic gneiss	A0512-30	3777	3777	0.001393	0.280471	2.2e-05	0.82	1.39549	0.784789				Liu et al., 2008
Anshan, NCC		trondhjemitic gneiss	A0512-31	3777	3777	0.001226	0.280419	2e-05	-0.6	-0.0242139	0.713445				Liu et al., 2008
Anshan, NCC		trondhjemitic gneiss	A0512-32	3777	3777	0.001463	0.280414	1.9e-05	-1.39	-0.820268	0.677772				Liu et al., 2008
Anshan, NCC		trondhjemitic gneiss	A0512-33	3777	3777	0.001625	0.280445	2e-05	-0.71	-0.136649	0.713445				Liu et al., 2008
Anshan, NCC		trondhjemitic gneiss	A0512-34	3777	3777	0.000484	0.280371	2e-05	-0.39	0.197392	0.713445				Liu et al., 2008
Anshan, NCC		trondhjemitic gneiss	A0512-35	3777	3777	0.001248	0.280353	2.4e-05	-3	-2.43592	0.856134				Liu et al., 2008
Anshan, NCC		trondhjemitic gneiss	A0512-36	3777	3777	0.004412	0.280433	2.8e-05	-8.39	-7.82847	0.998822				Liu et al., 2008
Anshan, NCC		trondhjemitic gneiss	A0512-37	3777	3777	0.001423	0.280421	2.9e-05	-1.03	-0.46631	1.03449				Liu et al., 2008
Anshan, NCC		trondhjemitic gneiss	A0512-38	3777	3777	0.001332	0.280312	2.4e-05	-4.7	-4.11741	0.856134				Liu et al., 2008
Anshan, NCC		trondhjemitic gneiss	05FW030-02.2	3704	3798	0.000929	0.280642	4.3e-05	6.44	9.19565	1.53398	8.00404	2.38321	2.38321	Wu et al., 2008
Anshan, NCC		trondhjemitic gneiss	05FW030-05	3625	3798	0.001008	0.280581	3.4e-05	2.25	6.81244	1.21292				Wu et al., 2008
Anshan, NCC		trondhjemitic gneiss	05FW031-05	3744	3808	0.001008	0.280581	2e-05	5	7.04565	0.713498	3.40364	2.70542	5.67845	Wu et al., 2008
Anshan, NCC		trondhjemitic gneiss	05FW031-10	3808	3808	0.000575	0.280402	1.8e-05	1.2	1.79805	0.642148				Wu et al., 2008
Anshan, NCC		trondhjemitic gneiss	05FW031-11	3627	3627	0.000724	0.28052	1.9e-05	0.83	1.36721	0.677529				Wu et al., 2008
Anshan, NCC		trondhjemitic gneiss	05FW032-03.1	3816	3802	0.000996	0.280441	1.8e-05	1.68	1.9428	0.642139	1.85294	0.306178	3.22021	Wu et al., 2008
Anshan, NCC		trondhjemitic gneiss	05FW032-04	3733	3802	0.000439	0.280402	2e-05	-0.19	2.01324	0.713487				Wu et al., 2008
Anshan, NCC		trondhjemitic gneiss	05FW032-05	3817	3802	0.000314	0.280403	1.8e-05	2.15	2.37696	0.642139				Wu et al., 2008
Anshan, NCC		trondhjemitic gneiss	05FW032-07	3771	3802	0.000838	0.280441	1.8e-05	1.06	2.35744	0.642139				Wu et al., 2008
Anshan, NCC		trondhjemitic gneiss	05FW032-09	3837	3802	0.000477	0.280452	1.4e-05	3.95	3.69724	0.499441				Wu et al., 2008
Anshan, NCC		trondhjemitic gneiss	05FW032-10	3789	3802	0.000659	0.280397	1.8e-05	0.37	1.25752	0.642139				Wu et al., 2008
Anshan, NCC		trondhjemitic gneiss	05FW032-11	3813	3802	0.000893	0.28042	2.1e-05	1.1	1.46394	0.749162				Wu et al., 2008
Anshan, NCC		trondhjemitic gneiss	05FW032-14	3817	3802	0.000353	0.280384	1.8e-05	1.36	1.5968	0.642139				Wu et al., 2008
Anshan, NCC		trondhjemitic gneiss	05FW032-15	3776	3802	0.00106	0.280459	1.8e-05	1.22	2.41698	0.642139				Wu et al., 2008
Anshan, NCC		trondhjemitic gneiss	05FW032-16	3790	3802	0.000926	0.280434	2.4e-05	1	1.87678	0.856185				Wu et al., 2008
Anshan, NCC		trondhjemitic gneiss	05FW032-17	3803	3802	0.001259	0.280453	2.2e-05	1.1	1.68069	0.784836				Wu et al., 2008
Anshan, NCC		trondhjemitic gneiss	05FW032-18	3723	3802	0.000768	0.280419	2.1e-05	-0.66	1.75631	0.749162				Wu et al., 2008
Anshan, NCC		trondhjemitic gneiss	05FW032-20	3791	3802	0.000438	0.2804	1.8e-05	1.1	1.94452	0.642139				Wu et al., 2008
Anshan, NCC		trondhjemitic gneiss	05FW032-21.1	3820	3802	0.001081	0.280458	2e-05	2.13	2.32619	0.713487				Wu et al., 2008
Anshan, NCC		trondhjemitic gneiss	05FW032-21.2	3836	3802	0.000976	0.280411	3.1e-05	1.14	0.925051	1.10591				Wu et al., 2008
Anshan, NCC		trondhjemitic gneiss	05FW032-22	3804	3802	0.000782	0.280424	1.7e-05	1.36	1.89794	0.606464				Wu et al., 2008
Anshan, NCC		trondhjemitic gneiss	05FW032-23	3828	3802	0.000535	0.280366	1.8e-05	0.49	0.477032	0.642139				Wu et al., 2008
Anshan, NCC		trondhjemitic gneiss	05FW032-24	3834	3802	0.000769	0.280416	1.8e-05	1.8	1.64666	0.642139				Wu et al., 2008
Anshan, NCC		trondhjemitic gneiss	05FW032-25	3739	3802	0.001077	0.280436	1.9e-05	-0.47	1.55185	0.677813				Wu et al., 2008
Anshan, NCC		trondhjemitic gneiss	05FW035-03.2	3768	3790	0.000536	0.280371	1.6e-05	-0.74	0.369097	0.570774	0.821075	0.489755	1.18785	Wu et al., 2008
Anshan, NCC		trondhjemitic gneiss	05FW035-04	3744	3790	0.000872	0.28039	1.6e-05	-1.46	0.168025	0.570774				Wu et al., 2008
Anshan, NCC		trondhjemitic gneiss	05FW035-07	3777	3790	0.001238	0.28045	1.8e-05	0.47	1.35109	0.64212				Wu et al., 2008
Anshan, NCC		trondhjemitic gneiss	05FW035-12	3798	3790	0.000907	0.280412	1.9e-05	0.45	0.86129	0.677794				Wu et al., 2008
Anshan, NCC		trondhjemitic gneiss	05FW035-15	3801	3790	0.000677	0.280409	1.9e-05	1.01	1.35587	0.677794				Wu et al., 2008
Anshan, NCC		trondhjemitic gneiss	05FW040-16	3711	3751	0.000456	0.280504	1.6e-05	2.9	4.3988	0.57072	1.57418	5.64924	5.64924	Wu et al., 2008
Anshan, NCC		trondhjemitic gneiss	05FW040-20	3697	3751	0.001178	0.280398	1.9e-05	-3.05	-1.25044	0.67773				Wu et al., 2008
Xinyang, NCC		Felsic Granulite (monzogranite in composition)	16XY02-1	3553	3553	0.000454599	0.280331	8.35947e-06	-7.05343	-6.45061	0.298041	-5.79129	0.451106	2.77925	Ma et al., 2020
Xinyang, NCC		Felsic Granulite (monzogranite in composition)	16XY02-2	3553	3553	0.00062531	0.280384	9.27819e-06	-5.55819	-4.95573	0.330796				Ma et al., 2020
Xinyang, NCC		Felsic Granulite (monzogranite in composition)	16XY02-3	3553	3553	0.000535391	0.280398	9.53866e-06	-4.85472	-4.25198	0.340083				Ma et al., 2020
Xinyang, NCC		Felsic Granulite (monzogranite in composition)	16XY02-4	3553	3553	0.000821844	0.280393	8.22146e-06	-5.72584	-5.12393	0.293121				Ma et al., 2020
Xinyang, NCC		Felsic Granulite (monzogranite in composition)	16XY02-5	3553	3553	0.000591245	0.28039	1.29229e-05	-5.26157	-4.65901	0.460741				Ma et al., 2020
Xinyang, NCC		Felsic Granulite (monzogranite in composition)	16XY02-7	3553	3553	0.000720053	0.280364	1.22163e-05	-6.50927	-5.90713	0.435548				Ma et al., 2020
Xinyang, NCC		Felsic Granulite (monzogranite in composition)	16XY02-8	3553	3553	0.000994447	0.280366	1.35719e-05	-7.1176	-6.51624	0.483882				Ma et al., 2020
Xinyang, NCC		Felsic Granulite (monzogranite in composition)	16XY02-10	3553	3553	0.00108212	0.280382	1.33401e-05	-6.74558	-6.14443	0.475614				Ma et al., 2020
Xinyang, NCC		Felsic Granulite (monzogranite in composition)	16XY02-11	3553	3553	0.000354055	0.280313	1.57301e-05	-7.43537	-6.8323	0.560827				Ma et al., 2020
Xinyang, NCC		Felsic Granulite (monzogranite in composition)	16XY02-12	3553	3553	0.000316657	0.280374	1.36755e-05	-5.17882	-4.57551	0.487576				Ma et al., 2020
Xinyang, NCC		Felsic Granulite (monzogranite in composition)	16XY02-13	3553	3553	0.00115454	0.280363	1.53182e-05	-7.63212	-7.03123	0.546143				Ma et al., 2020
Xinyang, NCC		Felsic Granulite (monzogranite in composition)	16XY02-14	3553	3553	0.00063674	0.280342	1.71552e-05	-7.08685	-6.48452	0.611637				Ma et al., 2020
Xinyang, NCC		Felsic Granulite (monzogranite in composition)	16XY02-15	3553	3553	0.000620792	0.280386	1.60523e-05	-5.48066	-4.87819	0.572314				Ma et al., 2020
Xinyang, NCC		Felsic Granulite (monzogranite in composition)	16XY02-16	3553	3553	0.000593975	0.280333	1.48056e-05	-7.32631	-6.72388	0.527865				Ma et al., 2020
Xinyang, NCC		Felsic Granulite (monzogranite in composition)	16XY02-17	3553	3553	0.000372156	0.280352	1.4864e-05	-6.0904	-5.48729	0.529948				Ma et al., 2020
Xinyang, NCC		Felsic Granulite (monzogranite in composition)	16XY02-18	3553	3553	0.000508505	0.280319	1.7386e-05	-7.59531	-6.99266	0.619866				Ma et al., 2020
Xinyang, NCC		Felsic Granulite (monzogranite in composition)	16XY02-19	3553	3553	0.000608292	0.28037	1.61997e-05	-6.03979	-5.43732	0.577569				Ma et al., 2020
Xinyang, NCC		Felsic Granulite (monzogranite in composition)	XY9928-1	3748	3748	0.000340344	0.280356	1.33052e-05	-1.31854	-0.653946	0.474595	-1.73129	0.607788	4.08092	Ma et al., 2020
Xinyang, NCC		Felsic Granulite (monzogranite in composition)	XY9928-2	3748	3748	0.000297134	0.280299	1.47543e-05	-3.22106	-2.55647	0.526284				Ma et al., 2020
Xinyang, NCC		Felsic Granulite (monzogranite in composition)	XY9928-3	3748	3748	0.000494627	0.280284	1.22702e-05	-4.28736	-3.62341	0.437677				Ma et al., 2020
Xinyang, NCC		Felsic Granulite (monzogranite in composition)	XY9928-4	3748	3748	0.000570389	0.280351	1.28175e-05	-2.10557	-1.44169	0.457197				Ma et al., 2020
Xinyang, NCC		Felsic Granulite (monzogranite in composition)	XY9928-5	3748	3748	0.000524079	0.280374	1.29849e-05	-1.15032	-0.486247	0.463169				Ma et al., 2020
Xinyang, NCC		Felsic Granulite (monzogranite in composition)	XY9928-6	3748	3748	0.000291002	0.280353	1.22446e-05	-1.28848	-0.623745	0.436761				Ma et al., 2020
Xinyang, NCC		Felsic Granulite (monzogranite in composition)	XY9928-7	3748	3748	0.000344294	0.280387	1.25521e-05	-0.207142	0.457511	0.447731				Ma et al., 2020
Xinyang, NCC		Felsic Granulite (monzogranite in composition)	XY9928-8	3748	3748	0.000511914	0.28031	1.35014e-05	-3.41804	-2.75408	0.48159				Ma et al., 2020
Xinyang, NCC		Felsic Granulite (monzogranite in composition)	XY9928-9	3748	3748	0.000745295	0.280337	1.28487e-05	-3.02851	-2.36519	0.458311				Ma et al., 2020
Xinyang, NCC		Felsic Granulite (monzogranite in composition)	XY9928-10	3748	3748	0.000559479	0.280309	1.30801e-05	-3.55129	-2.88748	0.466563				Ma et al., 2020
Xinyang, NCC		Felsic Granulite (monzogranite in composition)	XY9928-11	3748	3748	0.000833866	0.280317	1.43363e-05	-3.97542	-3.31242	0.511372				Ma et al., 2020
Xinyang, NCC		Felsic Granulite (monzogranite in composition)	XY9928-12	3748	3748	0.000619064	0.280304	1.30739e-05	-3.88826	-3.22464	0.466341				Ma et al., 2020
Xinyang, NCC		Felsic Granulite (monzogranite in composition)	XY9928-13	3748	3748	0.000607425	0.280327	1.37397e-05	-3.05445	-2.39075	0.490092				Ma et al., 2020
Xinyang, NCC		Felsic Granulite (monzogranite in composition)	XY9928-14	3748	3748	0.000531237	0.280366	1.2362e-05	-1.46325	-0.799213	0.44095				Ma et al., 2020
Xinyang, NCC		Felsic Granulite (monzogranite in composition)	XY9928-15	3748	3748	0.000289219	0.28032	1.3739e-05	-2.47509	-1.81043	0.490068				Ma et al., 2020
Xinyang, NCC		Felsic Granulite (monzogranite in composition)	XY9928-16	3748	3748	0.000438402	0.280362	1.17214e-05	-1.35582	-0.691511	0.4181				Ma et al., 2020
Xinyang, NCC		Felsic Granulite (monzogranite in composition)	XY9928-18	3748	3748	0.000406751	0.280372	1.35806e-05	-0.932632	-0.268207	0.484415				Ma et al., 2020
Xinyang, NCC		Felsic Granulite (monzogranite in composition)	XY9951-1	3817	3817	0.00074155	0.280275	1.08583e-05	-3.63743	-2.95248	0.387379	-2.48235	1.10692	5.80954	Ma et al., 2020
Xinyang, NCC		Felsic Granulite (monzogranite in composition)	XY9951-2	3817	3817	0.000428547	0.280287	1.14871e-05	-2.38309	-1.69714	0.40981				Ma et al., 2020
Xinyang, NCC		Felsic Granulite (monzogranite in composition)	XY9951-3	3817	3817	0.00060435	0.280182	9.33366e-06	-6.60107	-5.91592	0.332985				Ma et al., 2020
Xinyang, NCC		Felsic Granulite (monzogranite in composition)	XY9951-4	3817	3817	0.000673709	0.280317	1.20553e-05	-1.98256	-1.2973	0.430081				Ma et al., 2020
Xinyang, NCC		Felsic Granulite (monzogranite in composition)	XY9951-6	3817	3817	0.000405257	0.280256	1.16517e-05	-3.43011	-2.74416	0.415683				Ma et al., 2020
Xinyang, NCC		Felsic Granulite (monzogranite in composition)	XY9951-7	3817	3817	0.000491977	0.280337	1.17603e-05	-0.792262	-0.106385	0.419556				Ma et al., 2020
Xinyang, NCC		Felsic Granulite (monzogranite in composition)	XY9951-10	3817	3817	0.000561976	0.280304	1.1555e-05	-2.13135	-1.44577	0.412233				Ma et al., 2020
Xinyang, NCC		Felsic Granulite (monzogranite in composition)	XY9951-11	3817	3817	0.000424524	0.280307	1.22183e-05	-1.6533	-0.96729	0.435896				Ma et al., 2020
Xinyang, NCC		Felsic Granulite (monzogranite in composition)	XY9951-14	3817	3817	0.000524323	0.280318	1.15483e-05	-1.52706	-0.841332	0.411992				Ma et al., 2020
Xinyang, NCC		Felsic Granulite (monzogranite in composition)	XY9951-17	3817	3817	0.0016935	0.280275	1.15213e-05	-6.14294	-5.46094	0.411029				Ma et al., 2020
Xinyang, NCC		Felsic Granulite (monzogranite in composition)	XY9951-18	3817	3817	0.000899503	0.280207	1.09585e-05	-6.499	-5.81471	0.390951				Ma et al., 2020
Xinyang, NCC		Felsic Granulite (monzogranite in composition)	XY9951-19	3817	3817	0.000547026	0.280294	1.19243e-05	-2.44835	-1.76275	0.425409				Ma et al., 2020
Xinyang, NCC		Felsic Granulite (monzogranite in composition)	XY9951-20	3817	3817	0.000561338	0.280309	1.25902e-05	-1.95002	-1.26443	0.449165				Ma et al., 2020
Xinyang, NCC		garnet-free felsic granulite	XY11-33-15c1	3500	3500	0.00047	0.280543	3.5e-05	-0.8	-0.171896	1.2477	-4.01424	2.0785	5.52213	Ping et al., 2018
Xinyang, NCC		garnet-free felsic granulite	XY11-33-16c1	3500	3500	0.000824	0.280412	3.5e-05	-6.3	-5.69403	1.2477				Ping et al., 2018
Xinyang, NCC		garnet-free felsic granulite	XY11-33-33c1	3500	3500	0.000647	0.280405	3.4e-05	-6.1	-5.51748	1.21205				Ping et al., 2018
Xinyang, NCC		garnet-free felsic granulite	XY11-33-34c1	3500	3500	0.00058	0.280458	4.5e-05	-4	-3.46682	1.60419				Ping et al., 2018
Xinyang, NCC		garnet-free felsic granulite	XY11-33-6c1	3500	3500	0.00082	0.280425	3.5e-05	-5.8	-5.22097	1.2477				Ping et al., 2018
Xinyang, NCC		garnet-free felsic granulite	XY11-28-13c	3687	3687	0.001043	0.280579	3.4e-05	3.4	4.06713	1.21259	0.880446	1.48134	5.71504	Ping et al., 2018
Xinyang, NCC		garnet-free felsic granulite	XY11-28-14c	3687	3687	0.000663	0.280423	2.4e-05	-1.2	-0.530774	0.855949				Ping et al., 2018
Xinyang, NCC		garnet-free felsic granulite	XY11-28-24c	3687	3687	0.000864	0.280406	2.9e-05	-2.3	-1.64791	1.03427				Ping et al., 2018
Xinyang, NCC		garnet-free felsic granulite	XY11-28-32c	3687	3687	0.000831	0.280495	3.6e-05	1	1.6101	1.28392				Ping et al., 2018
Xinyang, NCC		garnet-free felsic granulite	XY11-28-4c	3687	3687	0.000796	0.280432	2.9e-05	-1.2	-0.547811	1.03427				Ping et al., 2018
Xinyang, NCC		garnet-free felsic granulite	XY11-28-6c	3687	3687	0.001372	0.280552	6.9e-05	1.6	2.26804	2.46085				Ping et al., 2018
Xinyang, NCC		garnet-free felsic granulite	XY11-28-9c	3687	3687	0.000686	0.280466	3.9e-05	0.3	0.944346	1.39092				Ping et al., 2018
Eastern Hebei, NCC	Shimen Complex	Banded trondhjemitic gneiss	J2006-3-1MA	3804	3804	0.000694972	0.280277	2.35e-05	-3.07433	-3.07433	0.838352	-1.464	0.653716	3.19554	Dong et al., 2024
Eastern Hebei, NCC	Shimen Complex	Banded trondhjemitic gneiss	J2006-4-1MA	3804	3804	0.00107555	0.280343	2.14e-05	-1.71913	-1.71913	0.763435				Dong et al., 2024
Eastern Hebei, NCC	Shimen Complex	Banded trondhjemitic gneiss	J2006-7-1MA	3804	3804	0.0009318	0.280354	2.44e-05	-0.959948	-0.959948	0.870459				Dong et al., 2024
Eastern Hebei, NCC	Shimen Complex	Banded trondhjemitic gneiss	J2006-22-1MA	3804	3804	0.00137414	0.280358	2.32e-05	-1.97873	-1.97873	0.827649				Dong et al., 2024
Eastern Hebei, NCC	Shimen Complex	Banded trondhjemitic gneiss	J2006-31-1MA	3804	3804	0.000743231	0.280277	2.29e-05	-3.20462	-3.20462	0.816947				Dong et al., 2024
Eastern Hebei, NCC	Shimen Complex	Banded trondhjemitic gneiss	J2006-59-1MA	3804	3804	0.000441957	0.280344	2.44e-05	-0.00907427	-0.00907427	0.870459				Dong et al., 2024
Eastern Hebei, NCC	Shimen Complex	Banded trondhjemitic gneiss	J2006-60-1MA	3804	3804	0.00113465	0.280377	2.65e-05	-0.654234	-0.654234	0.945375				Dong et al., 2024
Eastern Hebei, NCC	Shimen Complex	Banded trondhjemitic gneiss	J2006-72-1MA	3804	3804	0.000416602	0.280311	2.7e-05	-1.14473	-1.14473	0.963213				Dong et al., 2024
Eastern Hebei, NCC	Shimen Complex	Banded trondhjemitic gneiss	J2006-77-1MA	3804	3804	0.00107626	0.280365	2.6e-05	-0.932585	-0.932585	0.927538				Dong et al., 2024
Eastern Hebei, NCC	Shimen Complex	Banded trondhjemitic gneiss	J2006-78-1MA	3804	3804	0.000965427	0.280356	2.22e-05	-0.962627	-0.962627	0.791975				Dong et al., 2024
Eastern Hebei, NCC	Shimen Complex	Banded trondhjemitic gneiss	J2117-30-1MA	3754	3754	0.000891866	0.280351	1.85e-05	-2.1236	-2.1236	0.6599	-3.49252	0.753681	2.4706	Dong et al., 2024
Eastern Hebei, NCC	Shimen Complex	Banded trondhjemitic gneiss	J2117-43-1MA	3754	3754	0.000747105	0.280301	2.18e-05	-3.51796	-3.51796	0.777612				Dong et al., 2024
Eastern Hebei, NCC	Shimen Complex	Banded trondhjemitic gneiss	J2117-7-1RC	3754	3754	0.000930456	0.280321	2.29e-05	-3.27582	-3.27582	0.816849				Dong et al., 2024
Eastern Hebei, NCC	Shimen Complex	Banded trondhjemitic gneiss	J2117-13-1RC	3754	3754	0.000694697	0.280331	2.14e-05	-2.30856	-2.30856	0.763344				Dong et al., 2024
Eastern Hebei, NCC	Shimen Complex	Banded trondhjemitic gneiss	J2117-21-1RC	3754	3754	0.00080986	0.280289	1.99e-05	-4.11565	-4.11565	0.709838				Dong et al., 2024
Eastern Hebei, NCC	Shimen Complex	Banded trondhjemitic gneiss	J2117-23-1RC	3754	3754	0.000782533	0.280274	2.49e-05	-4.59421	-4.59421	0.888189				Dong et al., 2024
Eastern Hebei, NCC	Shimen Complex	Banded trondhjemitic gneiss	J2117-38-1RC	3754	3754	0.000820983	0.280279	2.18e-05	-4.51186	-4.51186	0.777612				Dong et al., 2024
Eastern Hebei, NCC	Shimen Complex	Banded trondhjemitic gneiss	J2120-13-1MA	3819	3819	0.00124328	0.280258	2.28e-05	-4.85208	-4.85208	0.813409	-2.69166	1.00157	4.71946	Dong et al., 2024
Eastern Hebei, NCC	Shimen Complex	Banded trondhjemitic gneiss	J2120-21-1MA	3819	3819	0.0012379	0.28035	2.46e-05	-1.53431	-1.53431	0.877625				Dong et al., 2024
Eastern Hebei, NCC	Shimen Complex	Banded trondhjemitic gneiss	J2120-25-1MA	3819	3819	0.00151271	0.280334	2.52e-05	-2.8511	-2.8511	0.899031				Dong et al., 2024
Eastern Hebei, NCC	Shimen Complex	Banded trondhjemitic gneiss	J2120-30-1MA	3819	3819	0.000851054	0.280361	2.22e-05	-0.132627	-0.132627	0.792003				Dong et al., 2024
Eastern Hebei, NCC	Shimen Complex	Banded trondhjemitic gneiss	J2120-34-1MA	3819	3819	0.000993846	0.280283	2.25e-05	-3.29539	-3.29539	0.802706				Dong et al., 2024
Eastern Hebei, NCC	Shimen Complex	Banded trondhjemitic gneiss	J2120-14-1RC	3819	3819	0.00086644	0.280271	2.03e-05	-3.39829	-3.39829	0.724219				Dong et al., 2024
Eastern Hebei, NCC	Shimen Complex	Banded trondhjemitic gneiss	J2120-24-1RC	3819	3819	0.00038333	0.280238	1.64e-05	-3.28042	-3.28042	0.585084				Dong et al., 2024
Eastern Hebei, NCC	Shimen Complex	Banded trondhjemitic gneiss	J2120-28-1RC	3819	3819	0.000877338	0.280305	1.76e-05	-2.18907	-2.18907	0.627895				Dong et al., 2024
Eastern Hebei, NCC	Shimen Complex	Banded trondhjemitic gneiss	J2206-6-1MA	3838	3838	0.00115606	0.280273	2.08e-05	-3.639	-3.639	0.742091	-3.389	0.921001	4.42204	Dong et al., 2024
Eastern Hebei, NCC	Shimen Complex	Banded trondhjemitic gneiss	J2206-7-1MA	3838	3838	0.00121102	0.280262	2.18e-05	-4.17355	-4.17355	0.777769				Dong et al., 2024
Eastern Hebei, NCC	Shimen Complex	Banded trondhjemitic gneiss	J2206-10-1MA	3838	3838	0.000925328	0.280234	2.53e-05	-4.42248	-4.42248	0.90264				Dong et al., 2024
Eastern Hebei, NCC	Shimen Complex	Banded trondhjemitic gneiss	J2206-16-1MA	3838	3838	0.000968381	0.280308	1.89e-05	-1.88575	-1.88575	0.674304				Dong et al., 2024
Eastern Hebei, NCC	Shimen Complex	Banded trondhjemitic gneiss	J2206-19-1MA	3838	3838	0.00090854	0.280331	3.32e-05	-0.906568	-0.906568	1.18449				Dong et al., 2024
Eastern Hebei, NCC	Shimen Complex	Banded trondhjemitic gneiss	J2206-20-1MA	3838	3838	0.000671251	0.280256	1.61e-05	-2.96419	-2.96419	0.574407				Dong et al., 2024
Eastern Hebei, NCC	Shimen Complex	Banded trondhjemitic gneiss	J2206-22-1MA	3838	3838	0.000960559	0.28028	2.04e-05	-2.85685	-2.85685	0.72782				Dong et al., 2024
Eastern Hebei, NCC	Shimen Complex	Banded trondhjemitic gneiss	J2206-24-1MA	3838	3838	0.000831068	0.280201	2.88e-05	-5.32861	-5.32861	1.02751				Dong et al., 2024
Eastern Hebei, NCC	Shimen Complex	Banded trondhjemitic gneiss	J2206-25-1RC	3838	3838	0.000719914	0.280221	2.16e-05	-4.32404	-4.32404	0.770633				Dong et al., 2024
Eastern Hebei, NCC	Shimen Complex	Banded granodioritic gneiss	J2115-26-1MA	3774	3774	0.00179628	0.28045	2.41e-05	-0.465741	-0.465741	0.859695	-3.03851	0.720953	4.92433	Dong et al., 2024
Eastern Hebei, NCC	Shimen Complex	Banded granodioritic gneiss	J2115-32-1MA	3774	3774	0.00114969	0.280326	2.12e-05	-3.2231	-3.2231	0.756246				Dong et al., 2024
Eastern Hebei, NCC	Shimen Complex	Banded granodioritic gneiss	J2115-33-1MA	3774	3774	0.00154035	0.280349	2.31e-05	-3.4057	-3.4057	0.824023				Dong et al., 2024
Eastern Hebei, NCC	Shimen Complex	Banded granodioritic gneiss	J2115-41-1MA	3774	3774	0.00174629	0.28035	2.28e-05	-3.92416	-3.92416	0.813321				Dong et al., 2024
Eastern Hebei, NCC	Shimen Complex	Banded granodioritic gneiss	J2115-44-1MA	3774	3774	0.00134207	0.280412	1.98e-05	-0.659858	-0.659858	0.706305				Dong et al., 2024
Eastern Hebei, NCC	Shimen Complex	Banded granodioritic gneiss	J2115-1-1RC	3774	3774	0.00136413	0.280323	2.19e-05	-3.88855	-3.88855	0.781216				Dong et al., 2024
Eastern Hebei, NCC	Shimen Complex	Banded granodioritic gneiss	J2115-2-1RC	3774	3774	0.000935923	0.28035	1.68e-05	-1.79959	-1.79959	0.599289				Dong et al., 2024
Eastern Hebei, NCC	Shimen Complex	Banded granodioritic gneiss	J2115-3-1RC	3774	3774	0.00147909	0.280289	2.28e-05	-5.39007	-5.39007	0.813321				Dong et al., 2024
Eastern Hebei, NCC	Shimen Complex	Banded granodioritic gneiss	J2115-9-1RC	3774	3774	0.00210502	0.280401	2.11e-05	-3.03193	-3.03193	0.752679				Dong et al., 2024
Eastern Hebei, NCC	Shimen Complex	Banded granodioritic gneiss	J2115-10-1RC	3774	3774	0.00182209	0.280355	2.02e-05	-3.93962	-3.93962	0.720574				Dong et al., 2024
Eastern Hebei, NCC	Shimen Complex	Banded granodioritic gneiss	J2115-19-1RC	3774	3774	0.00212746	0.280373	2.34e-05	-4.07848	-4.07848	0.834724				Dong et al., 2024
Eastern Hebei, NCC	Shimen Complex	Banded granodioritic gneiss	J2115-20-1RC	3774	3774	0.00136644	0.280357	2.33e-05	-2.65318	-2.65318	0.831157				Dong et al., 2024
Eastern Hebei, NCC	Shimen Complex	Banded granodioritic gneiss	J2115-27-1RC	3774	3774	0.0014316	0.280336	2.08e-05	-3.58267	-3.58267	0.741977				Dong et al., 2024
Eastern Hebei, NCC	Shimen Complex	Banded granodioritic gneiss	J2115-38-1RC	3774	3774	0.00128299	0.280356	1.79e-05	-2.49651	-2.49651	0.638528				Dong et al., 2024
Eastern Hebei, NCC	Shimen Complex	Granodioritic gneiss	J2215-1-1MA	3773	3773	0.00119089	0.280337	2.07e-05	-2.94688	-2.94688	0.738408	-2.45685	0.534084	3.53705	Dong et al., 2024
Eastern Hebei, NCC	Shimen Complex	Granodioritic gneiss	J2215-4-1MA	3773	3773	0.000882586	0.280333	1.92e-05	-2.30119	-2.30119	0.6849				Dong et al., 2024
Eastern Hebei, NCC	Shimen Complex	Granodioritic gneiss	J2215-7-1MA	3773	3773	0.000766333	0.280313	1.81e-05	-2.70484	-2.70484	0.645661				Dong et al., 2024
Eastern Hebei, NCC	Shimen Complex	Granodioritic gneiss	J2215-8-1MA	3773	3773	0.000962376	0.280301	2.03e-05	-3.62901	-3.62901	0.724139				Dong et al., 2024
Eastern Hebei, NCC	Shimen Complex	Granodioritic gneiss	J2215-9-1MA	3773	3773	0.00105972	0.280309	1.97e-05	-3.62203	-3.62203	0.702736				Dong et al., 2024
Eastern Hebei, NCC	Shimen Complex	Granodioritic gneiss	J2215-11-1MA	3773	3773	0.00114379	0.280382	1.98e-05	-1.24043	-1.24043	0.706303				Dong et al., 2024
Eastern Hebei, NCC	Shimen Complex	Granodioritic gneiss	J2215-12-1MA	3773	3773	0.00135603	0.28036	2.05e-05	-2.57061	-2.57061	0.731274				Dong et al., 2024
Eastern Hebei, NCC	Shimen Complex	Granodioritic gneiss	J2215-14-1MA	3773	3773	0.00113546	0.28034	1.91e-05	-2.70627	-2.70627	0.681333				Dong et al., 2024
Eastern Hebei, NCC	Shimen Complex	Granodioritic gneiss	J2215-15-1MA	3773	3773	0.00111779	0.280361	1.8e-05	-1.90401	-1.90401	0.642094				Dong et al., 2024
Eastern Hebei, NCC	Shimen Complex	Granodioritic gneiss	J2215-17-1MA	3773	3773	0.000810301	0.280328	1.86e-05	-2.29136	-2.29136	0.663497				Dong et al., 2024
Eastern Hebei, NCC	Shimen Complex	Granodioritic gneiss	J2215-18-1MA	3773	3773	0.000915239	0.280322	2.11e-05	-2.77859	-2.77859	0.752677				Dong et al., 2024
Eastern Hebei, NCC	Shimen Complex	Granodioritic gneiss	J2215-21-1RC	3773	3773	0.00144913	0.28035	2.02e-05	-3.15188	-3.15188	0.720572				Dong et al., 2024
Eastern Hebei, NCC	Shimen Complex	Granodioritic gneiss	J2215-23-1RC	3773	3773	0.000767053	0.280386	1.55e-05	-0.091964	-0.091964	0.552914				Dong et al., 2024
Eastern Hebei, NCC	Shimen Complex	Granodioritic gneiss	J2012-4-1MA	3786	3786	0.0011923	0.280334	2.58e-05	-2.75299	-2.75299	0.920363	-1.94874	0.652547	5.38678	Dong et al., 2024
Eastern Hebei, NCC	Shimen Complex	Granodioritic gneiss	J2012-5-1MA	3786	3786	0.00127364	0.280366	2.55e-05	-1.83825	-1.83825	0.909662				Dong et al., 2024
Eastern Hebei, NCC	Shimen Complex	Granodioritic gneiss	J2012-6-1MA	3786	3786	0.00101336	0.280331	2.51e-05	-2.40674	-2.40674	0.895392				Dong et al., 2024
Eastern Hebei, NCC	Shimen Complex	Granodioritic gneiss	J2012-7-1MA	3786	3786	0.000772199	0.280339	2.4e-05	-1.49482	-1.49482	0.856152				Dong et al., 2024
Eastern Hebei, NCC	Shimen Complex	Granodioritic gneiss	J2012-8-1MA	3786	3786	0.00146324	0.280384	2.03e-05	-1.67012	-1.67012	0.724162				Dong et al., 2024
Eastern Hebei, NCC	Shimen Complex	Granodioritic gneiss	J2012-13-1MA	3786	3786	0.00257775	0.280472	2.61e-05	-1.44642	-1.44642	0.931065				Dong et al., 2024
Eastern Hebei, NCC	Shimen Complex	Granodioritic gneiss	J2012-15-1MA	3786	3786	0.00107916	0.28034	2.95e-05	-2.26118	-2.26118	1.05235				Dong et al., 2024
Eastern Hebei, NCC	Shimen Complex	Granodioritic gneiss	J2012-17-1MA	3786	3786	0.00135568	0.280371	2.19e-05	-1.86353	-1.86353	0.781239				Dong et al., 2024
Eastern Hebei, NCC	Shimen Complex	Granodioritic gneiss	J2012-18-1MA	3786	3786	0.00112541	0.280355	2.62e-05	-1.84692	-1.84692	0.934633				Dong et al., 2024
Eastern Hebei, NCC	Shimen Complex	Granodioritic gneiss	J2012-19-1MA	3786	3786	0.00136319	0.280365	2.55e-05	-2.08649	-2.08649	0.909662				Dong et al., 2024
Eastern Hebei, NCC	Shimen Complex	Granodioritic gneiss	J2012-21-1MA	3786	3786	0.00140747	0.280342	2.34e-05	-3.02978	-3.02978	0.834748				Dong et al., 2024
Eastern Hebei, NCC	Shimen Complex	Granodioritic gneiss	J2012-28-1MA	3786	3786	0.00113456	0.280319	2.24e-05	-3.13721	-3.13721	0.799075				Dong et al., 2024
Eastern Hebei, NCC	Shimen Complex	Granodioritic gneiss	J2012-36-1MA	3786	3786	0.0016839	0.280325	2.65e-05	-4.36206	-4.36206	0.945335				Dong et al., 2024
Eastern Hebei, NCC	Shimen Complex	Granodioritic gneiss	J2012-45-1MA	3786	3786	0.000808667	0.280412	2.31e-05	1.02473	1.02473	0.824046				Dong et al., 2024
Eastern Hebei, NCC	Shimen Complex	Granodioritic gneiss	J2012-47-1MA	3786	3786	0.00112938	0.280405	2.16e-05	-0.0593694	-0.0593694	0.770537				Dong et al., 2024
Eastern Hebei, NCC	Shimen Complex	Granodioritic gneiss	J2013-1-1MA	3773	3773	0.00146698	0.280378	1.93e-05	-2.2031	-2.2031	0.688467	-2.15142	0.617755	4.13319	Dong et al., 2024
Eastern Hebei, NCC	Shimen Complex	Granodioritic gneiss	J2013-2-1MA	3773	3773	0.000428489	0.280375	1.69e-05	0.379231	0.379231	0.602855				Dong et al., 2024
Eastern Hebei, NCC	Shimen Complex	Granodioritic gneiss	J2013-3-1MA	3773	3773	0.000883883	0.280358	1.93e-05	-1.41634	-1.41634	0.688467				Dong et al., 2024
Eastern Hebei, NCC	Shimen Complex	Granodioritic gneiss	J2013-4-1MA	3773	3773	0.00137867	0.280339	2.54e-05	-3.37509	-3.37509	0.906066				Dong et al., 2024
Eastern Hebei, NCC	Shimen Complex	Granodioritic gneiss	J2013-5-2MA	3773	3773	0.00132362	0.280339	1.65e-05	-3.21396	-3.21396	0.588586				Dong et al., 2024
Eastern Hebei, NCC	Shimen Complex	Granodioritic gneiss	J2013-10-1MA	3773	3773	0.00142143	0.280331	2.49e-05	-3.75396	-3.75396	0.88823				Dong et al., 2024
Eastern Hebei, NCC	Shimen Complex	Granodioritic gneiss	J2013-14-1MA	3773	3773	0.00103032	0.280337	2.22e-05	-2.51814	-2.51814	0.791916				Dong et al., 2024
Eastern Hebei, NCC	Shimen Complex	Granodioritic gneiss	J2013-16-1MA	3773	3773	0.000775569	0.280355	1.97e-05	-1.21996	-1.21996	0.702736				Dong et al., 2024
Eastern Hebei, NCC	Shimen Complex	Granodioritic gneiss	J2013-17-1MA	3773	3773	0.000529633	0.280308	1.69e-05	-2.27767	-2.27767	0.602855				Dong et al., 2024
Eastern Hebei, NCC	Shimen Complex	Granodioritic gneiss	J2013-18-1MA	3773	3773	0.00133886	0.28039	2.59e-05	-1.44863	-1.44863	0.923902				Dong et al., 2024
Eastern Hebei, NCC	Shimen Complex	Granodioritic gneiss	J2013-19-1MA	3773	3773	0.00104652	0.280368	1.94e-05	-1.4652	-1.4652	0.692035				Dong et al., 2024
Eastern Hebei, NCC	Shimen Complex	Granodioritic gneiss	J2013-22-1MA	3773	3773	0.00259362	0.280452	2.66e-05	-2.51076	-2.51076	0.948872				Dong et al., 2024
Eastern Hebei, NCC	Shimen Complex	Granodioritic gneiss	J2013-23-1MA	3773	3773	0.000840712	0.280312	1.77e-05	-2.94485	-2.94485	0.631392				Dong et al., 2024
Eastern Hebei, NCC	Shimen Complex	Quartz monzonite gneiss	J2111-1-1MA	3775	3775	0.000740069	0.280315	2.09e-05	-2.51817	-2.51817	0.745546	-2.68809	0.538619	3.84002	Dong et al., 2024
Eastern Hebei, NCC	Shimen Complex	Quartz monzonite gneiss	J2111-4-1MA	3775	3775	0.00134273	0.280364	1.76e-05	-2.34364	-2.34364	0.627828				Dong et al., 2024
Eastern Hebei, NCC	Shimen Complex	Quartz monzonite gneiss	J2111-8-1MA	3775	3775	0.000992537	0.280336	1.79e-05	-2.42313	-2.42313	0.63853				Dong et al., 2024
Eastern Hebei, NCC	Shimen Complex	Quartz monzonite gneiss	J2111-16-1MA	3775	3775	0.00134022	0.280375	2.46e-05	-1.92332	-1.92332	0.877533				Dong et al., 2024
Eastern Hebei, NCC	Shimen Complex	Quartz monzonite gneiss	J2111-20-1MA	3775	3775	0.00173586	0.28036	2.18e-05	-3.50325	-3.50325	0.777651				Dong et al., 2024
Eastern Hebei, NCC	Shimen Complex	Quartz monzonite gneiss	J2111-21-1MA	3775	3775	0.00086991	0.280336	2.26e-05	-2.10014	-2.10014	0.806189				Dong et al., 2024
Eastern Hebei, NCC	Shimen Complex	Quartz monzonite gneiss	J2111-22-1MA	3775	3775	0.00165069	0.280365	1.95e-05	-3.11016	-3.11016	0.695605				Dong et al., 2024
Eastern Hebei, NCC	Shimen Complex	Quartz monzonite gneiss	J2111-6-1RC	3775	3775	0.00114327	0.28039	2e-05	-0.900164	-0.900164	0.713441				Dong et al., 2024
Eastern Hebei, NCC	Shimen Complex	Quartz monzonite gneiss	J2111-7-1RC	3775	3775	0.000958978	0.280329	2.03e-05	-2.58185	-2.58185	0.724143				Dong et al., 2024
Eastern Hebei, NCC	Shimen Complex	Quartz monzonite gneiss	J2111-9-1RC	3775	3775	0.00181513	0.280385	2.24e-05	-2.80722	-2.80722	0.799054				Dong et al., 2024
Eastern Hebei, NCC	Shimen Complex	Quartz monzonite gneiss	J2111-10-1RC	3775	3775	0.00111093	0.280354	2.24e-05	-2.07517	-2.07517	0.799054				Dong et al., 2024
Eastern Hebei, NCC	Shimen Complex	Quartz monzonite gneiss	J2111-12-1RC	3775	3775	0.00150819	0.280309	2.04e-05	-4.74019	-4.74019	0.72771				Dong et al., 2024
Eastern Hebei, NCC	Shimen Complex	Quartz monzonite gneiss	J2111-15-1RC	3775	3775	0.00144755	0.280327	2.07e-05	-3.91872	-3.91872	0.738412				Dong et al., 2024
Eastern Hebei, NCC	Shimen Complex	Monzonitic gneiss	J2231-1-1MA	3782	3782	0.00138862	0.280372	2.18e-05	-2.02027	-2.02027	0.777664	-2.87838	1.13429	5.34478	Dong et al., 2024
Eastern Hebei, NCC	Shimen Complex	Monzonitic gneiss	J2231-4-2MA	3782	3782	0.00123616	0.28034	1.84e-05	-2.75318	-2.75318	0.656377				Dong et al., 2024
Eastern Hebei, NCC	Shimen Complex	Monzonitic gneiss	J2231-7-1MA	3782	3782	0.00220906	0.280323	2.52e-05	-5.88453	-5.88453	0.898951				Dong et al., 2024
Eastern Hebei, NCC	Shimen Complex	Monzonitic gneiss	J2231-8-1MA	3782	3782	0.00131729	0.280247	2.29e-05	-6.26465	-6.26465	0.816904				Dong et al., 2024
Eastern Hebei, NCC	Shimen Complex	Monzonitic gneiss	J2231-24-1MA	3782	3782	0.00168549	0.280378	2.03e-05	-2.58103	-2.58103	0.724155				Dong et al., 2024
Eastern Hebei, NCC	Shimen Complex	Monzonitic gneiss	J2231-12-1RC	3782	3782	0.00188612	0.280389	2.13e-05	-2.68728	-2.68728	0.759828				Dong et al., 2024
Eastern Hebei, NCC	Shimen Complex	Monzonitic gneiss	J2231-15-1RC	3782	3782	0.00207959	0.280453	2.5e-05	-0.919877	-0.919877	0.891816				Dong et al., 2024
Eastern Hebei, NCC	Shimen Complex	Monzonitic gneiss	J2231-19-1RC	3782	3782	0.00214555	0.280417	2.2e-05	-2.36909	-2.36909	0.784798				Dong et al., 2024
Eastern Hebei, NCC	Shimen Complex	Monzonitic gneiss	J2231-23-1RC	3782	3782	0.00242551	0.280471	2.69e-05	-1.16988	-1.16988	0.959595				Dong et al., 2024
Eastern Hebei, NCC	Shimen Complex	Monzonitic gneiss	J2231-26-1RC	3782	3782	0.00202677	0.280415	2.05e-05	-2.13401	-2.13401	0.731289				Dong et al., 2024
Eastern Hebei, NCC	Shimen Complex	Monzonitic gneiss	J2230-5-1MA	3640	3640	0.00174746	0.280467	2.42e-05	-2.8026	-2.8026	0.862984	-3.42788	1.1893	4.73441	Dong et al., 2024
Eastern Hebei, NCC	Shimen Complex	Monzonitic gneiss	J2230-8-1MA	3640	3640	0.0015898	0.280439	2.26e-05	-3.37721	-3.37721	0.805928				Dong et al., 2024
Eastern Hebei, NCC	Shimen Complex	Monzonitic gneiss	J2230-13-1MA	3640	3640	0.00209097	0.280389	2.15e-05	-6.43482	-6.43482	0.766701				Dong et al., 2024
Eastern Hebei, NCC	Shimen Complex	Monzonitic gneiss	J2230-18-1MA	3640	3640	0.00159467	0.280474	2.24e-05	-2.15199	-2.15199	0.798796				Dong et al., 2024
Eastern Hebei, NCC	Shimen Complex	Monzonitic gneiss	J2230-9-1RC	3640	3640	0.00127084	0.280421	2.17e-05	-3.22635	-3.22635	0.773833				Dong et al., 2024
Eastern Hebei, NCC	Shimen Complex	Monzonitic gneiss	J2230-14-1RC	3640	3640	0.0017957	0.280501	2.2e-05	-1.70041	-1.70041	0.784531				Dong et al., 2024
Eastern Hebei, NCC	Shimen Complex	Monzonitic gneiss	J2230-15-1RC	3640	3640	0.00216044	0.280454	2.08e-05	-4.30181	-4.30181	0.741739				Dong et al., 2024
Eastern Hebei, NCC	Shimen Complex	Syenogranitic gneiss	J2216-3-1MA	3786	3786	0.000988388	0.280302	2.5e-05	-3.37244	-3.37244	0.891825	-1.36217	0.584642	3.7164	Dong et al., 2024
Eastern Hebei, NCC	Shimen Complex	Syenogranitic gneiss	J2216-4-1MA	3786	3786	0.00149913	0.280394	2.02e-05	-1.43926	-1.43926	0.720595				Dong et al., 2024
Eastern Hebei, NCC	Shimen Complex	Syenogranitic gneiss	J2216-7-1MA	3786	3786	0.00121215	0.280379	1.99e-05	-1.22097	-1.22097	0.709893				Dong et al., 2024
Eastern Hebei, NCC	Shimen Complex	Syenogranitic gneiss	J2216-8-1MA	3786	3786	0.00136586	0.280366	2.07e-05	-2.08277	-2.08277	0.738431				Dong et al., 2024
Eastern Hebei, NCC	Shimen Complex	Syenogranitic gneiss	J2216-11-1MA	3786	3786	0.00135729	0.28039	2.22e-05	-1.20778	-1.20778	0.791941				Dong et al., 2024
Eastern Hebei, NCC	Shimen Complex	Syenogranitic gneiss	J2216-12-1MA	3786	3786	0.00111537	0.2804	1.78e-05	-0.193989	-0.193989	0.634979				Dong et al., 2024
Eastern Hebei, NCC	Shimen Complex	Syenogranitic gneiss	J2216-13-1MA	3786	3786	0.00124671	0.280425	2.02e-05	0.343952	0.343952	0.720595				Dong et al., 2024
Eastern Hebei, NCC	Shimen Complex	Syenogranitic gneiss	J2216-17-1MA	3786	3786	0.00145955	0.280389	1.98e-05	-1.49279	-1.49279	0.706325				Dong et al., 2024
Eastern Hebei, NCC	Shimen Complex	Syenogranitic gneiss	J2216-18-1MA	3786	3786	0.00114411	0.280351	2.09e-05	-2.03847	-2.03847	0.745566				Dong et al., 2024
Eastern Hebei, NCC	Shimen Complex	Syenogranitic gneiss	J2216-21-1MA	3786	3786	0.00112722	0.280375	1.97e-05	-1.12748	-1.12748	0.702758				Dong et al., 2024
Eastern Hebei, NCC	Shimen Complex	Syenogranitic gneiss	J2216-24-1MA	3786	3786	0.00205476	0.280412	2.03e-05	-2.21678	-2.21678	0.724162				Dong et al., 2024
Eastern Hebei, NCC	Shimen Complex	Syenogranitic gneiss	J2216-19-1RC	3786	3786	0.00176519	0.280445	1.91e-05	-0.29725	-0.29725	0.681354				Dong et al., 2024
Greenland		augen gneiss	163290-45	3612	3612	0.000491	0.280462	1.8e-05	1.83	-0.472662	0.641846	0.0564224	0.532298	0.844206	Amelin et al., 2000
Greenland		augen gneiss	163290-46	3612	3612	0.000651	0.280494	1.7e-05	2.56	0.270385	0.606188				Amelin et al., 2000
Greenland		augen gneiss	163290-47	3612	3612	0.000596	0.280493	1.9e-05	2.66	0.371544	0.677504				Amelin et al., 2000
Greenland		dark “early” phase of a polyphase gneiss	163263-40	3733	3733	0.000653	0.280447	5.1e-05	2.63	1.43227	1.81909	0.245301	0.834667	2.24792	Amelin et al., 2000
Greenland		dark “early” phase of a polyphase gneiss	163263-41	3733	3733	0.000572	0.280391	3.1e-05	0.85	-0.35662	1.10572				Amelin et al., 2000
Greenland		dark “early” phase of a polyphase gneiss	163263-42	3733	3733	0.000778	0.280393	1.9e-05	1.58	-0.81565	0.677701				Amelin et al., 2000
Greenland		dark “early” phase of a polyphase gneiss	163263-43	3733	3733	0.000504	0.280396	1.9e-05	2.41	-0.00320577	0.677701				Amelin et al., 2000
Greenland		dark “early” phase of a polyphase gneiss	163263-44	3733	3733	0.000611	0.280431	2e-05	2.17	0.969709	0.713369				Amelin et al., 2000
Greenland		leucocratic foliated gneiss	16260-36	3686	3686	0.000417	0.280425	1.8e-05	2.54	0.14209	0.64196	-0.593829	0.564091	1.29691	Amelin et al., 2000
Greenland		leucocratic foliated gneiss	16260-37	3686	3686	0.000344	0.280391	1.9e-05	1.52	-0.885025	0.677624				Amelin et al., 2000
Greenland		leucocratic foliated gneiss	16260-38	3686	3686	0.00038	0.280386	2.7e-05	1.24	-1.15482	0.96294				Amelin et al., 2000
Greenland		leucocratic foliated gneiss	16260-39	3686	3686	0.000324	0.280401	9.4e-05	1.93	-0.477566	3.35246				Amelin et al., 2000
Greenland		typical massive grey gneiss	163254-33	3693	3693	0.000668	0.28047	1.9e-05	3.73	1.27372	0.677636	0.412637	0.883445	1.46267	Amelin et al., 2000
Greenland		typical massive grey gneiss	163254-34	3693	3693	0.000856	0.280452	1.7e-05	2.59	0.15314	0.606306				Amelin et al., 2000
Greenland		typical massive grey gneiss	163254-35	3693	3693	0.00043	0.280412	2.1e-05	2.28	-0.188951	0.748966				Amelin et al., 2000
Greenland		Migmatite	468633-2	3581.37	3684	0.00111719	0.280449	7.73435e-06	-3.21236	-0.837576	0.27584	-0.478184	0.485909	2.54883	Næraa et al., 2012
Greenland		Migmatite	468633-3	3623.76	3684	0.000910022	0.280472	6.86129e-06	-0.888144	0.5155	0.244703				Næraa et al., 2012
Greenland		Migmatite	468633-4	3640.89	3684	0.000868819	0.280416	9.33664e-06	-2.37313	-1.36739	0.332984				Næraa et al., 2012
Greenland		Migmatite	468633-5	3380.66	3684	0.000824897	0.280427	8.37021e-06	-7.93697	-0.87148	0.298517				Næraa et al., 2012
Greenland		Migmatite	468633-6	3677.63	3684	0.000743675	0.280448	6.80215e-06	-0.069771	0.0795778	0.242594				Næraa et al., 2012
Greenland		Migmatite	468633-7	3654.8	3684	0.00171574	0.280486	1.20407e-05	-1.69572	-1.03188	0.429424				Næraa et al., 2012
Greenland		Migmatite	468633-8	3699.2	3684	0.00103711	0.280444	1.05516e-05	-0.444163	-0.797302	0.376317				Næraa et al., 2012
Greenland		Migmatite	468633-10	3659.22	3684	0.000883354	0.280418	1.57085e-05	-1.90931	-1.3314	0.560234				Næraa et al., 2012
Greenland		Migmatite	468633-11	3647.33	3684	0.00131368	0.280471	9.25971e-06	-1.39486	-0.550725	0.330241				Næraa et al., 2012
Greenland		Migmatite	468633-12	3620.62	3684	0.000727375	0.280472	8.57866e-06	-0.491778	0.993426	0.305952				Næraa et al., 2012
Greenland		Migmatite	468633-14	3678.12	3684	0.0016291	0.280477	1.50659e-05	-1.26474	-1.13058	0.537313				Næraa et al., 2012
Greenland		Migmatite	468633-15	3637.03	3684	0.00108652	0.28044	6.37213e-06	-2.15645	-1.068	0.227257				Næraa et al., 2012
Greenland		Migmatite	468633-16	3616.56	3684	0.000962293	0.280494	9.66151e-06	-0.387513	1.18144	0.344571				Næraa et al., 2012
Greenland		Migmatite	498027-2	3867.76	3867	0.000691403	0.280307	1.0304e-05	-1.11738	-0.512788	0.367647	0.827171	0.606249	6.01723	Næraa et al., 2012
Greenland		Migmatite	498028-2	3822.46	3867	0.000517456	0.280272	8.29688e-06	-2.33727	-1.28302	0.296032				Næraa et al., 2012
Greenland		Migmatite	498027-3	3857.11	3867	0.000587697	0.280313	9.57264e-06	-0.619349	-0.014726	0.341551				Næraa et al., 2012
Greenland		Migmatite	498028-3	3835.51	3867	0.000494075	0.280287	1.03179e-05	-1.43223	-0.686075	0.368142				Næraa et al., 2012
Greenland		Migmatite	498027-4	3864	3867	0.000641325	0.280315	1.08031e-05	-0.691308	-0.0866897	0.385455				Næraa et al., 2012
Greenland		Migmatite	498028-4	3756.21	3867	0.00020449	0.280302	8.46041e-06	-2.04348	0.602434	0.301867				Næraa et al., 2012
Greenland		Migmatite	498027-5	3792.6	3867	0.000764461	0.280365	1.1432e-05	-0.852426	1.37669	0.407895				Næraa et al., 2012
Greenland		Migmatite	498028-5	3865.16	3867	0.000314692	0.28029	1.07366e-05	-0.13997	-0.0960786	0.383081				Næraa et al., 2012
Greenland		Migmatite	498027-6	3832.29	3867	0.00100877	0.280406	1.10856e-05	-0.0534904	2.16357	0.395533				Næraa et al., 2012
Greenland		Migmatite	498027-7	3635.76	3867	0.000532379	0.280442	1.3023e-05	-1.7964	4.7342	0.464662				Næraa et al., 2012
Greenland		Migmatite	498028-7	3800.31	3867	0.000339817	0.280292	9.60818e-06	-1.68215	-0.0953013	0.342819				Næraa et al., 2012
Greenland		Migmatite	498027-8	3775.65	3867	0.000465635	0.280356	1.12753e-05	-0.411752	1.83243	0.402301				Næraa et al., 2012
Greenland		Migmatite	498028-8	3630.61	3867	0.000440227	0.280393	7.96242e-06	-2.37733	3.22163	0.284099				Næraa et al., 2012
Greenland		Migmatite	498027-9	3654.54	3867	0.000289746	0.280365	7.72073e-06	-3.93379	2.63942	0.275475				Næraa et al., 2012
Greenland		Migmatite	498028-9	3478.51	3867	0.000256274	0.280358	8.38105e-06	-6.76057	2.47458	0.299035				Næraa et al., 2012
Greenland		Migmatite	498027-10	3896.62	3867	0.000922591	0.280348	1.00297e-05	-0.255281	0.349364	0.35786				Næraa et al., 2012
Greenland		Migmatite	498028-10	3580.46	3867	0.000223265	0.280292	1.05577e-05	-6.62849	0.19649	0.376699				Næraa et al., 2012
Greenland		Migmatite	498028-11	3765.57	3867	0.000820547	0.280331	9.59282e-06	-2.36776	0.00995194	0.342271				Næraa et al., 2012
Greenland		Migmatite	498027-12	3794.88	3867	0.000388421	0.280333	6.42235e-06	-1.01248	1.23544	0.229149				Næraa et al., 2012
Greenland		Migmatite	498028-12	3601.73	3867	0.000196259	0.280356	8.92991e-06	-3.76667	2.55999	0.318619				Næraa et al., 2012
Greenland		Migmatite	498027-13	3893.18	3867	0.000553001	0.280302	6.27722e-06	-0.929501	-0.324897	0.223971				Næraa et al., 2012
Greenland		Migmatite	498028-13	3887.94	3867	0.000648512	0.280322	1.09543e-05	0.620784	0.126605	0.39085				Næraa et al., 2012
Greenland		Migmatite	498027-14	3823.32	3867	0.000545785	0.280299	1.14684e-05	-1.0155	-0.410899	0.409192				Næraa et al., 2012
Greenland		Migmatite	498028-14	3780.54	3867	0.00100125	0.28034	1.25776e-05	-2.17614	-0.160198	0.448769				Næraa et al., 2012
Greenland		Orthogneiss	070026-2	3710.85	3780	0.000955451	0.280405	1.79054e-05	-1.35199	0.260009	0.638729	-0.0377966	0.373239	1.62886	Næraa et al., 2012
Greenland		Orthogneiss	070026-4	3762.75	3780	0.000801221	0.280397	9.74627e-06	-0.0189513	0.385431	0.347674				Næraa et al., 2012
Greenland		Orthogneiss	070026-5	3765.91	3780	0.000936521	0.280379	1.20267e-05	-0.953158	-0.624288	0.429024				Næraa et al., 2012
Greenland		Orthogneiss	070026-6	3772.75	3780	0.000723833	0.280395	1.13955e-05	0.312369	0.482763	0.406505				Næraa et al., 2012
Greenland		Orthogneiss	070026-7	3794.88	3780	0.000999014	0.280423	1.36658e-05	1.11546	0.768681	0.487495				Næraa et al., 2012
Greenland		Orthogneiss	070026-8	3748.25	3780	0.000956114	0.280382	1.1031e-05	-1.30329	-0.562907	0.393503				Næraa et al., 2012
Greenland		Orthogneiss	070026-9	3786.16	3780	0.000654723	0.280371	9.68511e-06	-0.0386695	-0.183733	0.345492				Næraa et al., 2012
Greenland		Orthogneiss	070026-10	3733.66	3780	0.000595324	0.280348	1.19444e-05	-1.95254	-0.86018	0.426087				Næraa et al., 2012
Greenland		Orthogneiss	070026-11	3696.36	3780	0.000933309	0.280396	1.13229e-05	-1.95671	-0.00594459	0.403916				Næraa et al., 2012
Greenland		Orthogneiss	070027-3	3794.76	3781	0.000869443	0.280377	1.03892e-05	-0.164045	-0.486058	0.370611	-0.885047	0.275604	1.0761	Næraa et al., 2012
Greenland		Orthogneiss	070027-4	3752	3781	0.000903712	0.280358	9.33512e-06	-1.94798	-1.27064	0.333008				Næraa et al., 2012
Greenland		Orthogneiss	070027-5	3745.45	3781	0.00104182	0.280389	1.01625e-05	-1.34486	-0.51808	0.362524				Næraa et al., 2012
Greenland		Orthogneiss	070027-6	3780.61	3781	0.000725611	0.280372	1.02696e-05	-0.317396	-0.308144	0.366343				Næraa et al., 2012
Greenland		Orthogneiss	070027-7	3774.33	3781	0.0010603	0.280368	9.90974e-06	-1.45912	-1.30412	0.353506				Næraa et al., 2012
Greenland		Orthogneiss	070027-8	3745.28	3781	0.00104822	0.28037	1.06559e-05	-2.05127	-1.22072	0.380124				Næraa et al., 2012
Greenland		Orthogneiss	070027-9	3792.27	3781	0.000742146	0.280343	1.04736e-05	-1.10118	-1.36581	0.373622				Næraa et al., 2012
Greenland		Orthogneiss	070027-10	3730.86	3781	0.000989003	0.280392	1.12931e-05	-1.45755	-0.289708	0.402855				Næraa et al., 2012
Greenland		Orthogneiss	070027-11	3779.73	3781	0.000902138	0.280362	9.94854e-06	-1.14235	-1.11269	0.35489				Næraa et al., 2012
Greenland		Orthogneiss	070027-12	3772.56	3781	0.00080262	0.280359	1.08353e-05	-1.17226	-0.974484	0.386524				Næraa et al., 2012
Greenland		Orthogneiss	jeg-sg-10-2	3759.13	3787	0.00079184	0.280378	1.04717e-05	-0.774756	-0.121448	0.373559	-0.605119	0.192777	2.46962	Næraa et al., 2012
Greenland		Orthogneiss	060011-2	3787	3787	0.000684892	0.280357	6.06546e-06	-0.579542	-0.579542	0.216374				Næraa et al., 2012
Greenland		Orthogneiss	jeg-sg-10-3	3780.52	3787	0.000813742	0.280368	1.10775e-05	-0.680321	-0.528426	0.395167				Næraa et al., 2012
Greenland		Orthogneiss	060011-3	3787	3787	0.000662878	0.280366	1.18612e-05	-0.227939	-0.227939	0.423127				Næraa et al., 2012
Greenland		Orthogneiss	jeg-sg-10-4	3784.89	3787	0.00104052	0.280382	9.79255e-06	-0.670822	-0.621729	0.349331				Næraa et al., 2012
Greenland		Orthogneiss	060011-4	3787	3787	0.00134626	0.280405	1.06066e-05	-0.597812	-0.597812	0.37837				Næraa et al., 2012
Greenland		Orthogneiss	jeg-sg-10-5	3793.94	3787	0.000456517	0.280351	4.94104e-06	-0.0405549	-0.204883	0.176262				Næraa et al., 2012
Greenland		Orthogneiss	060011-5	3787	3787	0.0005564	0.280348	6.93281e-06	-0.571375	-0.571375	0.247315				Næraa et al., 2012
Greenland		Orthogneiss	jeg-sg-10-6	3778.63	3787	0.000838162	0.28037	1.2902e-05	-0.72258	-0.52665	0.460252				Næraa et al., 2012
Greenland		Orthogneiss	060011-6	3787	3787	0.000870496	0.280374	7.17382e-06	-0.473111	-0.473111	0.255912				Næraa et al., 2012
Greenland		Orthogneiss	jeg-sg-10-7	3757.7	3787	0.000930469	0.280376	1.23714e-05	-1.23382	-0.549964	0.441325				Næraa et al., 2012
Greenland		Orthogneiss	060011-7	3787	3787	0.00120717	0.280397	6.9789e-06	-0.527163	-0.527163	0.248959				Næraa et al., 2012
Greenland		Orthogneiss	jeg-sg-10-8	3757.7	3787	0.000332071	0.280311	1.32334e-05	-2.01443	-1.31811	0.472075				Næraa et al., 2012
Greenland		Orthogneiss	060011-8	3787	3787	0.00090963	0.280361	6.1046e-06	-1.02953	-1.02953	0.21777				Næraa et al., 2012
Greenland		Orthogneiss	jeg-sg-10-9	3781.06	3787	0.000955567	0.280339	1.71172e-05	-2.07088	-1.93237	0.610622				Næraa et al., 2012
Greenland		Orthogneiss	060011-9	3787	3787	0.00129359	0.280407	1.48405e-05	-0.385913	-0.385913	0.529408				Næraa et al., 2012
Greenland		Orthogneiss	jeg-sg-10-10	3781.82	3787	0.000887905	0.280356	8.2747e-06	-1.26	-1.13878	0.295184				Næraa et al., 2012
Greenland		Orthogneiss	jeg-sg-10-11	3773.63	3787	0.000720879	0.280367	1.10387e-05	-0.658325	-0.344244	0.393784				Næraa et al., 2012
Greenland		Orthogneiss	060011-11	3787	3787	0.00127032	0.2804	6.429e-06	-0.577769	-0.577769	0.229342				Næraa et al., 2012
Greenland		Orthogneiss	jeg-sg-10-12	3653.24	3787	0.000928482	0.280356	1.25692e-05	-4.39547	-1.27698	0.448382				Næraa et al., 2012
Greenland		Orthogneiss	060011-12	3787	3787	0.000776968	0.280348	1.25209e-05	-1.13691	-1.13691	0.44666				Næraa et al., 2012
Greenland		Orthogneiss	jeg-sg-10-13	3780.97	3787	0.00102041	0.280371	1.24627e-05	-1.123	-0.982636	0.444583				Næraa et al., 2012
Greenland		Orthogneiss	060011-13	3787	3787	0.000784151	0.280361	1.24527e-05	-0.72044	-0.72044	0.444226				Næraa et al., 2012
Greenland		Orthogneiss	jeg-sg-10-14	3711.73	3787	0.00124607	0.28043	1.00381e-05	-1.20214	0.537253	0.358091				Næraa et al., 2012
Greenland		Orthogneiss	060011-14	3787	3787	0.00120546	0.280418	1.12727e-05	0.241708	0.241708	0.402133				Næraa et al., 2012
Greenland		Orthogneiss	jeg-sg-10-15	3790.75	3787	0.000902452	0.280384	9.51417e-06	-0.0940143	-0.181702	0.3394				Næraa et al., 2012
Greenland		Orthogneiss	060011-15	3787	3787	0.00117231	0.280394	8.54423e-06	-0.561747	-0.561747	0.304799				Næraa et al., 2012
Greenland		Orthogneiss	jeh-sg-05-2	3795.03	3793	0.00101558	0.280392	1.21609e-05	-0.0307057	-0.0781052	0.433822	-0.0861119	0.227454	1.17417	Næraa et al., 2012
Greenland		Orthogneiss	jeh-sg-05-3	3794.57	3793	0.00080534	0.280379	9.6798e-06	0.0661292	0.0294012	0.345313				Næraa et al., 2012
Greenland		Orthogneiss	jeh-sg-05-4	3781.9	3793	0.000904951	0.280372	1.18577e-05	-0.742553	-0.483114	0.423006				Næraa et al., 2012
Greenland		Orthogneiss	jeh-sg-05-5	3788.53	3793	0.000801017	0.280373	1.1042e-05	-0.27283	-0.167921	0.393906				Næraa et al., 2012
Greenland		Orthogneiss	jeh-sg-05-6	3790.73	3793	0.000764088	0.280386	9.71306e-06	0.338901	0.392086	0.3465				Næraa et al., 2012
Greenland		Orthogneiss	jeh-sg-05-7	3786.87	3793	0.000774976	0.280359	1.1504e-05	-0.744516	-0.600633	0.41039				Næraa et al., 2012
Greenland		Orthogneiss	jeh-sg-05-8	3772.18	3793	0.000852308	0.28038	1.22192e-05	-0.544348	-0.0570209	0.435905				Næraa et al., 2012
Greenland		Orthogneiss	jeh-sg-05-9	3800.97	3793	0.000997072	0.280374	8.93407e-06	-0.474141	-0.659995	0.31871				Næraa et al., 2012
Greenland		Orthogneiss	jeh-sg-05-10	3725.73	3793	0.000970713	0.280405	1.23057e-05	-1.05387	0.51418	0.43899				Næraa et al., 2012
Greenland		Orthogneiss	jeh-sg-05-11	3785.86	3793	0.000713714	0.280373	6.04347e-06	-0.133864	0.0340619	0.215592				Næraa et al., 2012
Greenland		Orthogneiss	jeh-sg-05-12	3789.02	3793	0.000935941	0.280392	1.14273e-05	0.0369464	0.12983	0.407652				Næraa et al., 2012
Greenland		Orthogneiss	jeh-sg-07-2	3801.54	3797	0.000636262	0.280374	1.22021e-05	0.471189	0.364106	0.435297	-0.134599	0.34723	1.54781	Næraa et al., 2012
Greenland		Orthogneiss	jeh-sg-07-4	3762.79	3797	0.000404111	0.280344	8.78254e-06	-0.906815	-0.0951756	0.313308				Næraa et al., 2012
Greenland		Orthogneiss	jeh-sg-07-5	3795.09	3797	0.000528756	0.280339	1.10224e-05	-0.625072	-0.579992	0.393214				Næraa et al., 2012
Greenland		Orthogneiss	jeh-sg-07-6	3770.76	3797	0.0008263	0.280395	1.76953e-05	0.021685	0.636368	0.631261				Næraa et al., 2012
Greenland		Orthogneiss	jeh-sg-07-7	3799.5	3797	0.000590199	0.280334	6.94424e-06	-0.852428	-0.911442	0.247728				Næraa et al., 2012
Greenland		Orthogneiss	jeh-sg-07-8	3789.65	3797	0.000976009	0.280379	8.21269e-06	-0.493952	-0.322508	0.292979				Næraa et al., 2012
Greenland		Orthogneiss	jeh-sg-07-9	3800.09	3797	0.00059423	0.280359	1.19429e-05	0.0116362	-0.0613142	0.42605				Næraa et al., 2012
Greenland		Orthogneiss	jeh-sg-07-10	3751.07	3797	0.000404062	0.280343	6.6367e-06	-1.19642	-0.106835	0.236757				Næraa et al., 2012
Greenland	Nuuk area	Augen gneiss	163290	3622	3622	0.00049	0.280462	1.8e-05	-0.2	-0.234355	0.641862	0.289955	0.526827	0.831005	Amelin et al., 2011
Greenland	Nuuk area	Augen gneiss	163290	3622	3622	0.00065	0.280494	1.7e-05	0.5	0.50757	0.606203				Amelin et al., 2011
Greenland	Nuuk area	Augen gneiss	163290	3622	3622	0.0006	0.280493	1.9e-05	0.6	0.596649	0.677521				Amelin et al., 2011
Greenland	Nuuk area	Tonalitic gneiss	TK99-26	3824	3824	0.00047	0.280359	1.5e-05	0.9	0.91921	0.535144	1.15683	0.289879	0.500217	Amelin et al., 2011
Greenland	Nuuk area	Tonalitic gneiss	TK99-26	3824	3824	0.00024	0.280356	2.9e-05	1.4	1.41943	1.03461				Amelin et al., 2011
Greenland	Nuuk area	Tonalitic gneiss	TK99-26	3824	3824	0.00043	0.280362	9e-06	1.1	1.13185	0.321086				Amelin et al., 2011
Greenland	SOI gneiss	Dark ‘‘early’’ phase of a polyphase gneiss	163263	3738	3738	0.00078	0.280393	1.9e-05	-0.7	-0.703635	0.677709	-0.289184	0.828901	0.828901	Amelin et al., 2011
Greenland	SOI gneiss	Dark ‘‘early’’ phase of a polyphase gneiss	163263	3738	3738	0.0005	0.280396	1.9e-05	0.1	0.125266	0.677709				Amelin et al., 2011
Greenland	SOI gneiss	Dark ‘‘early’’ phase of a polyphase gneiss	163263	3680	3680	0.00065	0.280447	5.1e-05	0.2	0.193697	1.81886	-0.493418	0.812871	2.08511	Amelin et al., 2011
Greenland	SOI gneiss	Dark ‘‘early’’ phase of a polyphase gneiss	163263	3680	3680	0.00057	0.280391	3.1e-05	-1.6	-1.60057	1.10558				Amelin et al., 2011
Greenland	SOI gneiss	Dark ‘‘early’’ phase of a polyphase gneiss	163263	3680	3680	0.00061	0.280431	2e-05	-0.3	-0.275468	0.713279				Amelin et al., 2011
Greenland	SOI gneiss	Dark ‘‘early’’ phase of a polyphase gneiss	163263	3680	3680	0.00058	0.280401	9e-06	-1.3	-1.26929	0.320975				Amelin et al., 2011
Greenland	SOI gneiss	Dark ‘‘early’’ phase of a polyphase gneiss	163263	3680	3680	0.00069	0.280458	7e-06	0.484542	0.484542	0.249648				Amelin et al., 2011
Greenland	SOI gneiss	Leucocratic foliated gneiss	163260	3686	3686	0.00042	0.280425	1.8e-05	0.2	0.134468	0.64196	-0.963112	0.864614	2.59325	Amelin et al., 2011
Greenland	SOI gneiss	Leucocratic foliated gneiss	163260	3686	3686	0.00034	0.280391	1.9e-05	-0.9	-0.874862	0.677624				Amelin et al., 2011
Greenland	SOI gneiss	Leucocratic foliated gneiss	163260	3686	3686	0.00038	0.280386	2.7e-05	-1.1	-1.15482	0.96294				Amelin et al., 2011
Greenland	SOI gneiss	Leucocratic foliated gneiss	163260	3686	3686	0.00043	0.280353	6e-06	-2.5	-2.45878	0.213987				Amelin et al., 2011
Greenland	SOI gneiss	Leucocratic foliated gneiss	163260	3686	3686	0.00043	0.280409	8e-06	-0.5	-0.461571	0.285316				Amelin et al., 2011
Greenland	SOI gneiss	Massive tonalitic gneiss	163254	3695	3695	0.00067	0.28047	1.9e-05	1.3	1.31562	0.677639	-0.0651258	0.826065	2.49146	Amelin et al., 2011
Greenland	SOI gneiss	Massive tonalitic gneiss	163254	3695	3695	0.00086	0.280452	1.7e-05	0.2	0.189672	0.606309				Amelin et al., 2011
Greenland	SOI gneiss	Massive tonalitic gneiss	163254	3695	3695	0.00043	0.280412	2.1e-05	-0.1	-0.141624	0.748969				Amelin et al., 2011
Greenland	SOI gneiss	Massive tonalitic gneiss	163254	3695	3695	0.0008	0.280428	6e-06	-0.5	-0.513459	0.213991				Amelin et al., 2011
Greenland	SOI gneiss	Massive tonalitic gneiss	163254	3695	3695	0.00071	0.280403	1.9e-05	-1.2	-1.17584	0.677639				Amelin et al., 2011
Greenland	SOI gneiss	Tonalitic gneiss	SK00-1	3815	3815	0.00086	0.280378	1e-05	0.3	0.356601	0.356755	1.6873	0.942257	2.8574	Amelin et al., 2011
Greenland	SOI gneiss	Tonalitic gneiss	SK00-1	3815	3815	0.00079	0.280381	1.4e-05	0.7	0.647986	0.499457				Amelin et al., 2011
Greenland	SOI gneiss	Tonalitic gneiss	SK00-1	3815	3815	0.00094	0.280464	3.6e-05	3.2	3.214	1.28432				Amelin et al., 2011
Greenland	SOI gneiss	Tonalitic gneiss	SK00-1	3815	3815	0.00072	0.280428	3.4e-05	2.5	2.50909	1.21297				Amelin et al., 2011
Greenland	SOI gneiss	Tonalitic gneiss	SK00-1	3815	3815	0.00061	0.280438	6.5e-05	3.2	3.15556	2.31891				Amelin et al., 2011
Greenland	SOI gneiss	Tonalitic gneiss	SK00-1	3815	3815	0.00102	0.280417	5.6e-05	1.3	1.32655	1.99783				Amelin et al., 2011
Greenland	SOI gneiss	Tonalitic gneiss	SK00-1	3815	3815	0.00074	0.280376	6e-05	0.6	0.601294	2.14053				Amelin et al., 2011
Greenland	SOI gneiss	Tonalitic gneiss	SK00-11	3833	3833	0.0005	0.280329	5.1e-05	0	-0.017158	1.81953	0.904095	1.37103	2.90477	Amelin et al., 2011
Greenland	SOI gneiss	Tonalitic gneiss	SK00-11	3833	3833	0.00037	0.280341	2.1e-05	0.8	0.755037	0.749218				Amelin et al., 2011
Greenland	SOI gneiss	Tonalitic gneiss	SK00-11	3833	3833	0.00047	0.280327	8e-06		-0.00911124	0.285416				Amelin et al., 2011
Greenland	SOI gneiss	Tonalitic gneiss	SK00-11	3833	3833	0.0004	0.280403	1e-05	2.9	2.88761	0.35677				Amelin et al., 2011
Greenland	SOI gneiss	Tonalitic gneiss	SK00-4	3783	3783	0.00014	0.280317	5.6e-05	-0.7	-0.688869	1.99767	-0.340185	0.269201	0.927491	Amelin et al., 2011
Greenland	SOI gneiss	Tonalitic gneiss	SK00-4	3783	3783	0.00035	0.280328	3e-05	-0.8	-0.8447	1.07018				Amelin et al., 2011
Greenland	SOI gneiss	Tonalitic gneiss	SK00-4	3783	3783	0.00033	0.28035	7e-06	0	-0.00768669	0.249709				Amelin et al., 2011
Greenland	SOI gneiss	Tonalitic gneiss	SK00-4	3783	3783	0.00035	0.280354	6e-06	0.1	0.0827918	0.214036				Amelin et al., 2011
Greenland	SOI gneiss	Tonalitic gneiss	SK00-4	3783	3783	0.00038	0.280342	1.5e-05	-0.4	-0.4236	0.535091				Amelin et al., 2011
Greenland	SOI gneiss	Tonalitic gneiss	SK00-4	3783	3783	0.00055	0.280354	1.5e-05	-0.4	-0.439333	0.535091				Amelin et al., 2011
Greenland	SOI gneiss	Tonalitic gneiss	SK00-4	3783	3783	0.00035	0.28035	2.6e-05	-0.1	-0.0598992	0.927491				Amelin et al., 2011
Greenland	SOI gneiss	Tonalitic gneiss	SK00-7	3633	3633	0.00025	0.28038	3.7e-05	-2.3	-2.29836	1.31942	-1.59956	0.47045	0.994718	Amelin et al., 2011
Greenland	SOI gneiss	Tonalitic gneiss	SK00-7	3633	3633	0.00028	0.280409	1.4e-05	-1.3	-1.33931	0.499239				Amelin et al., 2011
Greenland	SOI gneiss	Tonalitic gneiss	SK00-7	3633	3633	0.00028	0.28041	1.3e-05	-1.3	-1.30365	0.463579				Amelin et al., 2011
Greenland	SOI gneiss	Tonalitic gneiss	SK00-7	3633	3633	0.00027	0.280405	1.6e-05	-1.4	-1.45692	0.570559				Amelin et al., 2011
Greenland	Itsaq Gneiss Complex	Meta-tonalite	G97/18-2.1	3816	3816	0.00032	0.280323	2e-05	-1.2	-0.159548	0.713511	-0.0252147	0.315461	1.85272	Hiess et al., 2009
Greenland	Itsaq Gneiss Complex	Meta-tonalite	G97/18-1.1b	3816	3816	0.000503	0.280358	2.3e-05	0.6	0.606997	0.820538				Hiess et al., 2009
Greenland	Itsaq Gneiss Complex	Meta-tonalite	G97/18-4.1	3816	3816	0.000396	0.280356	2.3e-05	-1.6	0.81753	0.820538				Hiess et al., 2009
Greenland	Itsaq Gneiss Complex	Meta-tonalite	G97/18-10.1	3816	3816	0.000517	0.280368	3.1e-05	-2.7	0.926871	1.10594				Hiess et al., 2009
Greenland	Itsaq Gneiss Complex	Meta-tonalite	G97/18-11.1b	3816	3816	0.00046	0.280344	3.1e-05	0.2	0.22082	1.10594				Hiess et al., 2009
Greenland	Itsaq Gneiss Complex	Meta-tonalite	G97/18-12.1b	3816	3816	0.000467	0.280319	2.9e-05	-0.7	-0.689511	1.03459				Hiess et al., 2009
Greenland	Itsaq Gneiss Complex	Meta-tonalite	G97/18-13.1b	3816	3816	0.000462	0.280328	3.1e-05	0.5	-0.355258	1.10594				Hiess et al., 2009
Greenland	Itsaq Gneiss Complex	Meta-tonalite	G97/18-14.1b	3816	3816	0.000489	0.280314	3e-05	-0.9	-0.925846	1.07027				Hiess et al., 2009
Greenland	Itsaq Gneiss Complex	Meta-tonalite	G97/18-15.1b	3816	3816	0.000488	0.280345	3.1e-05	-0.2	0.182731	1.10594				Hiess et al., 2009
Greenland	Itsaq Gneiss Complex	Meta-tonalite	G97/18-3.1b	3816	3816	0.000403	0.28032	2.3e-05	-0.9	-0.485232	0.820538				Hiess et al., 2009
Greenland	Itsaq Gneiss Complex	Meta-tonalite	G97/18-6.1b	3816	3816	0.000423	0.280353	2.8e-05	0.4	0.639373	0.998916				Hiess et al., 2009
Greenland	Itsaq Gneiss Complex	Meta-tonalite	G97/18-7.1b	3816	3816	0.00045	0.280317	2.9e-05	-0.4	-0.716077	1.03459				Hiess et al., 2009
Greenland	Itsaq Gneiss Complex	Meta-tonalite	G97/18-5.1b	3816	3816	0.000463	0.280327	2e-05	-0.4	-0.393568	0.713511				Hiess et al., 2009
Greenland	Itsaq Gneiss Complex	Meta-tonalite	G97/18-8.1b	3816	3816	0.00052	0.280355	2.9e-05	0.7	0.455185	1.03459				Hiess et al., 2009
Greenland	Itsaq Gneiss Complex	Meta-tonalite	G97/18-9.1b	3816	3816	0.000369	0.280317	3.1e-05	-0.3	-0.502688	1.10594				Hiess et al., 2009
Greenland	Itsaq Gneiss Complex	Meta-tonalite	G01/113-3.2	3849	3849	0.000427	0.280353	4.1e-05	-2.7	1.41218	1.46281	1.4299	0.312822	1.99139	Hiess et al., 2009
Greenland	Itsaq Gneiss Complex	Meta-tonalite	G01/113-12.1	3849	3849	0.000441	0.280373	3.4e-05	-0.8	2.08853	1.21307				Hiess et al., 2009
Greenland	Itsaq Gneiss Complex	Meta-tonalite	G01/113-10.1b	3849	3849	0.000474	0.280359	3.6e-05	1.3	1.50131	1.28442				Hiess et al., 2009
Greenland	Itsaq Gneiss Complex	Meta-tonalite	G01/113-11.1b	3849	3849	0.000674	0.280338	3.3e-05	-0.4	0.220414	1.17739				Hiess et al., 2009
Greenland	Itsaq Gneiss Complex	Meta-tonalite	G01/113-13.1b	3849	3849	0.000471	0.280362	3.7e-05	1.8	1.61632	1.3201				Hiess et al., 2009
Greenland	Itsaq Gneiss Complex	Meta-tonalite	G01/113-15.1b	3849	3849	0.000545	0.280353	4.6e-05	1.8	1.0985	1.64121				Hiess et al., 2009
Greenland	Itsaq Gneiss Complex	Meta-tonalite	G01/113-2.1b	3849	3849	0.000502	0.280381	3.7e-05	2.4	2.2118	1.3201				Hiess et al., 2009
Greenland	Itsaq Gneiss Complex	Meta-tonalite	G01/113-3.1b	3849	3849	0.000455	0.280372	4.1e-05	1.6	2.01564	1.46281				Hiess et al., 2009
Greenland	Itsaq Gneiss Complex	Meta-tonalite	G01/113-4.1b	3849	3849	0.000631	0.280354	3.4e-05	1.3	0.905573	1.21307				Hiess et al., 2009
Greenland	Itsaq Gneiss Complex	Meta-tonalite	G01/113-5.1b	3849	3849	0.000593	0.280378	3.6e-05	2.2	1.86287	1.28442				Hiess et al., 2009
Greenland	Itsaq Gneiss Complex	Meta-tonalite	G01/113-7.2b	3849	3849	0.000643	0.280356	3.5e-05	1.1	0.945031	1.24874				Hiess et al., 2009
Greenland	Itsaq Gneiss Complex	Meta-tonalite	G01/113-8.1b	3849	3849	0.000536	0.280366	3e-05	0.6	1.58625	1.07035				Hiess et al., 2009
Greenland	Itsaq Gneiss Complex	Meta-tonalite	G01/113-1.1b	3849	3849	0.000589	0.280357	3.5e-05	1.3	1.12425	1.24874				Hiess et al., 2009
Greenland	Itsaq Gneiss Complex	Meta-tonalite	248228-16.1b	3693	3693	0.000957	0.280438	3.3e-05	-0.7	-0.603297	1.17695	-0.0793182	0.241521	1.1055	Hiess et al., 2009
Greenland	Itsaq Gneiss Complex	Meta-tonalite	248228-1.1b	3693	3693	0.000911	0.280439	4.1e-05	-0.6	-0.450525	1.46227				Hiess et al., 2009
Greenland	Itsaq Gneiss Complex	Meta-tonalite	248228-18.1b	3693	3693	0.000597	0.280436	3.7e-05	0.4	0.241861	1.31961				Hiess et al., 2009
Greenland	Itsaq Gneiss Complex	Meta-tonalite	248228-18.2b	3693	3693	0.000501	0.28041	3.8e-05	-0.3	-0.441033	1.35527				Hiess et al., 2009
Greenland	Itsaq Gneiss Complex	Meta-tonalite	248228-2.1b	3693	3693	0.000809	0.280454	3.6e-05	0.7	0.344122	1.28394				Hiess et al., 2009
Greenland	Itsaq Gneiss Complex	Meta-tonalite	248228-21.1b	3693	3693	0.000887	0.280464	3.7e-05	0.6	0.5022	1.31961				Hiess et al., 2009
Greenland	Itsaq Gneiss Complex	Meta-tonalite	248228-22.1b	3693	3693	0.000658	0.280419	4e-05	-0.4	-0.519738	1.4266				Hiess et al., 2009
Greenland	Itsaq Gneiss Complex	Meta-tonalite	248228-3.1b	3693	3693	0.000786	0.280444	3.8e-05	0	0.0460254	1.35527				Hiess et al., 2009
Greenland	Itsaq Gneiss Complex	Meta-tonalite	248228-4.1b	3693	3693	0.000796	0.280454	4.4e-05	0.1	0.377218	1.56926				Hiess et al., 2009
Greenland	Itsaq Gneiss Complex	Meta-tonalite	248228-5.1b	3693	3693	0.000808	0.280439	3.6e-05	0	-0.188307	1.28394				Hiess et al., 2009
Greenland	Itsaq Gneiss Complex	Meta-tonalite	248228-6.1b	3693	3693	0.000595	0.280424	2.9e-05	-0.3	-0.181028	1.03429				Hiess et al., 2009
Greenland	Itsaq Gneiss Complex	Meta-tonalite	G01/36-1.2	3880	3880	0.000342	0.280271	2.1e-05	-2.1	-0.549396	0.749302	0.540671	0.426553	7.23789	Hiess et al., 2009
Greenland	Itsaq Gneiss Complex	Meta-tonalite	G01/36-2.1	3880	3880	0.000443	0.280275	2.3e-05	-4.5	-0.677417	0.820664				Hiess et al., 2009
Greenland	Itsaq Gneiss Complex	Meta-tonalite	G01/36-3.1	3880	3880	0.000408	0.280299	2.8e-05	-1	0.272751	0.99907				Hiess et al., 2009
Greenland	Itsaq Gneiss Complex	Meta-tonalite	G01/36-4.1	3880	3880	0.000412	0.280284	2.8e-05	-1.3	-0.273187	0.99907				Hiess et al., 2009
Greenland	Itsaq Gneiss Complex	Meta-tonalite	G01/36-4.2	3880	3880	0.000444	0.280309	2.5e-05	-0.8	0.533059	0.892027				Hiess et al., 2009
Greenland	Itsaq Gneiss Complex	Meta-tonalite	G01/36-6.1	3880	3880	0.000587	0.280317	2.3e-05	-3.7	0.435175	0.820664				Hiess et al., 2009
Greenland	Itsaq Gneiss Complex	Meta-tonalite	G01/36-7.1	3880	3880	0.000567	0.280286	2.7e-05	-4.3	-0.617325	0.963389				Hiess et al., 2009
Greenland	Itsaq Gneiss Complex	Meta-tonalite	G01/36-9.1	3880	3880	0.000814	0.280341	2.5e-05	-0.5	0.683015	0.892027				Hiess et al., 2009
Greenland	Itsaq Gneiss Complex	Meta-tonalite	G01/36-10.1	3880	3880	0.000435	0.280387	2.4e-05	-2.1	3.34031	0.856346				Hiess et al., 2009
Greenland	Itsaq Gneiss Complex	Meta-tonalite	G01/36-11.1	3880	3880	0.00027	0.280299	2e-05	-0.2	0.64268	0.713621				Hiess et al., 2009
Greenland	Itsaq Gneiss Complex	Meta-tonalite	G01/36-12.1b	3880	3880	0.000215	0.280305	2.1e-05	0.7	1.0042	0.749302				Hiess et al., 2009
Greenland	Itsaq Gneiss Complex	Meta-tonalite	G01/36-5.1b	3880	3880	0.000433	0.280274	2.1e-05	-0.8	-0.686292	0.749302				Hiess et al., 2009
Greenland	Itsaq Gneiss Complex	Meta-tonalite	G01/36-8.1b	3880	3880	0.000518	0.2803	2.3e-05	-0.2	0.0135615	0.820664				Hiess et al., 2009
Greenland	Itsaq Gneiss Complex	Meta-tonalite	G01/36-R-1.1	3880	3880	0.000191	0.280341	4.1e-05	-1	2.35306	1.46292				Hiess et al., 2009
Greenland	Itsaq Gneiss Complex	Meta-tonalite	G01/36-R-1.2	3880	3880	0.000327	0.280324	3.9e-05	-1.6	1.38191	1.39156				Hiess et al., 2009
Greenland	Itsaq Gneiss Complex	Meta-tonalite	G01/36-R-10.1b	3880	3880	0.000703	0.280347	4.6e-05	1.2	1.19465	1.64133				Hiess et al., 2009
Greenland	Itsaq Gneiss Complex	Meta-tonalite	G01/36-R-10.2b	3880	3880	0.000697	0.280343	5.7e-05	1	1.06801	2.03382				Hiess et al., 2009
Greenland	Itsaq Gneiss Complex	Meta-tonalite	G01/36-R-10.3b	3880	3880	0.000367	0.280268	5.2e-05	-0.8	-0.723456	1.85542				Hiess et al., 2009
Greenland	Itsaq Gneiss Complex	Meta-tonalite	G01/36-R-11.1b	3880	3880	0.000545	0.280351	5.3e-05	1.1	1.76092	1.8911				Hiess et al., 2009
Greenland	Itsaq Gneiss Complex	Meta-tonalite	G01/36-R-12.1	3880	3880	0.000325	0.280317	3.8e-05	-0.3	1.1375	1.35588				Hiess et al., 2009
Greenland	Itsaq Gneiss Complex	Meta-tonalite	G01/36-R-12.2	3880	3880	0.000509	0.280373	5e-05	0.2	2.6424	1.78405				Hiess et al., 2009
Greenland	Itsaq Gneiss Complex	Meta-tonalite	G01/36-R-13.2b	3880	3880	0.000271	0.280321	4.7e-05	1.1	1.42498	1.67701				Hiess et al., 2009
Greenland	Itsaq Gneiss Complex	Meta-tonalite	G01/36-R-14.1	3880	3880	0.000433	0.280456	4.9e-05	-0.4	5.80766	1.74837				Hiess et al., 2009
Greenland	Itsaq Gneiss Complex	Meta-tonalite	G01/36-R-15.1	3880	3880	0.000228	0.280335	3.2e-05	0.5	2.03978	1.14179				Hiess et al., 2009
Greenland	Itsaq Gneiss Complex	Meta-tonalite	G01/36-R-16.1	3880	3880	0.0006	0.280333	3.5e-05	0.1	0.971224	1.24884				Hiess et al., 2009
Greenland	Itsaq Gneiss Complex	Meta-tonalite	G01/36-R-16.2	3880	3880	0.000805	0.280337	4.6e-05	-0.6	0.564417	1.64133				Hiess et al., 2009
Greenland	Itsaq Gneiss Complex	Meta-tonalite	G01/36-R-16.3	3880	3880	0.000417	0.280342	3.9e-05	-0.7	1.78291	1.39156				Hiess et al., 2009
Greenland	Itsaq Gneiss Complex	Meta-tonalite	G01/36-R-18.1b	3880	3880	0.000738	0.280367	4.6e-05	1.7	1.81445	1.64133				Hiess et al., 2009
Greenland	Itsaq Gneiss Complex	Meta-tonalite	G01/36-R-18.2	3880	3880	0.000129	0.280392	3.3e-05	-0.7	4.33899	1.17748				Hiess et al., 2009
Greenland	Itsaq Gneiss Complex	Meta-tonalite	G01/36-R-19.1	3880	3880	0.000276	0.280412	4.3e-05	-1.5	4.65856	1.53429				Hiess et al., 2009
Greenland	Itsaq Gneiss Complex	Meta-tonalite	G01/36-R-2.1b	3880	3880	0.00046	0.280346	4.5e-05	1.9	1.81037	1.60565				Hiess et al., 2009
Greenland	Itsaq Gneiss Complex	Meta-tonalite	G01/36-R-2.3b	3880	3880	0.000605	0.280365	4.2e-05	1.9	2.09961	1.4986				Hiess et al., 2009
Greenland	Itsaq Gneiss Complex	Meta-tonalite	G01/36-R-20.1	3880	3880	0.000252	0.280349	3.8e-05	-3.1	2.47498	1.35588				Hiess et al., 2009
Greenland	Itsaq Gneiss Complex	Meta-tonalite	G01/36-R-21.1	3880	3880	0.000264	0.28029	3.6e-05	-2.3	0.337634	1.28452				Hiess et al., 2009
Greenland	Itsaq Gneiss Complex	Meta-tonalite	G01/36-R-22.1	3880	3880	0.000544	0.280289	3.6e-05	-1.3	-0.448627	1.28452				Hiess et al., 2009
Greenland	Itsaq Gneiss Complex	Meta-tonalite	G01/36-R-22.2	3880	3880	0.000431	0.280253	3.7e-05	-2.2	-1.43023	1.3202				Hiess et al., 2009
Greenland	Itsaq Gneiss Complex	Meta-tonalite	G01/36-R-3.1	3880	3880	0.000372	0.280286	3.2e-05	-0.9	-0.0945996	1.14179				Hiess et al., 2009
Greenland	Itsaq Gneiss Complex	Meta-tonalite	G01/36-R-3.3	3880	3880	0.000746	0.280304	3.8e-05	-1.7	-0.454901	1.35588				Hiess et al., 2009
Greenland	Itsaq Gneiss Complex	Meta-tonalite	G01/36-R-3.4	3880	3880	0.000386	0.280261	3.2e-05	-2	-1.02416	1.14179				Hiess et al., 2009
Greenland	Itsaq Gneiss Complex	Meta-tonalite	G01/36-R-4.1b	3880	3880	0.000496	0.280318	4.9e-05	0	0.714795	1.74837				Hiess et al., 2009
Greenland	Itsaq Gneiss Complex	Meta-tonalite	G01/36-R-4.2b	3880	3880	0.000477	0.280303	4.7e-05	0.6	0.230511	1.67701				Hiess et al., 2009
Greenland	Itsaq Gneiss Complex	Meta-tonalite	G01/36-R-5.1b	3880	3880	0.000547	0.280305	3.6e-05	0.4	0.114228	1.28452				Hiess et al., 2009
Greenland	Itsaq Gneiss Complex	Meta-tonalite	G01/36-R-5.2b	3880	3880	0.00024	0.280275	3e-05	0	-0.133247	1.07043				Hiess et al., 2009
Greenland	Itsaq Gneiss Complex	Meta-tonalite	G01/36-R-6.1	3880	3880	0.000469	0.280388	4.8e-05	-0.8	3.28485	1.71269				Hiess et al., 2009
Greenland	Itsaq Gneiss Complex	Meta-tonalite	G01/36-R-7.1	3880	3880	0.000716	0.280318	4.4e-05	-2.1	0.125054	1.56997				Hiess et al., 2009
Greenland	Itsaq Gneiss Complex	Meta-tonalite	G01/36-R-8.1b	3880	3880	0.000488	0.280309	4.1e-05	1.1	0.41511	1.46292				Hiess et al., 2009
Greenland	Itsaq Gneiss Complex	Meta-tonalite	G01/36-R-8.2b	3880	3880	0.000827	0.280312	5.3e-05	-0.1	-0.386584	1.8911				Hiess et al., 2009
Greenland	Itsaq Gneiss Complex	Meta-tonalite	G01/36-R-8.3	3880	3880	0.00028	0.280299	4.5e-05	-1.8	0.615873	1.60565				Hiess et al., 2009
Greenland	Itsaq Gneiss Complex	Meta-tonalite	G01/36-R-9.1b	3880	3880	0.000553	0.280334	4.5e-05	1.7	1.1329	1.60565				Hiess et al., 2009
Greenland	Itsaq Gneiss Complex	Meta-tonalite	G01/36-1.1b	3880	3880	0.000348	0.280277	2.1e-05	-0.7	-0.351394	0.749302				Hiess et al., 2009
Greenland	Itsaq Gneiss Complex	Granitic augen gneiss	G97/111-1.1d	3635	3635	0.000602	0.280474	2.7e-05	0	0.219754	0.962822	-1.15414	0.344493	2.23676	Hiess et al., 2011
Greenland	Itsaq Gneiss Complex	Granitic augen gneiss	G97/111-2.1d	3635	3635	0.000663	0.280456	2.7e-05	-0.8	-0.574877	0.962822				Hiess et al., 2011
Greenland	Itsaq Gneiss Complex	Granitic augen gneiss	G97/111-3.1d	3635	3635	0.000494	0.28043	2.2e-05	-0.9	-1.07885	0.784522				Hiess et al., 2011
Greenland	Itsaq Gneiss Complex	Granitic augen gneiss	G97/111-4.1d	3635	3635	0.000642	0.280445	2.5e-05	-0.9	-0.914552	0.891502				Hiess et al., 2011
Greenland	Itsaq Gneiss Complex	Granitic augen gneiss	G97/111-B-1.1d	3635	3635	0.000712	0.280419	3.3e-05	-1.7	-2.017	1.17678				Hiess et al., 2011
Greenland	Itsaq Gneiss Complex	Granitic augen gneiss	G97/111-B-2.1d	3635	3635	0.000609	0.280436	3.1e-05	-1.2	-1.15286	1.10546				Hiess et al., 2011
Greenland	Itsaq Gneiss Complex	Granitic augen gneiss	G97/111-B-3.1d	3635	3635	0.000587	0.280413	2.9e-05	-1.4	-1.91795	1.03414				Hiess et al., 2011
Greenland	Itsaq Gneiss Complex	Granitic augen gneiss	G97/111-B-4.1	3635	3635	0.000591	0.280432	3.4e-05	-5	-1.25042	1.21244				Hiess et al., 2011
Greenland	Itsaq Gneiss Complex	Granitic augen gneiss	G97/111-B-5.1d	3635	3635	0.00089	0.280441	2.6e-05	-1.6	-1.67821	0.927162				Hiess et al., 2011
Greenland	Itsaq Gneiss Complex	Granitic augen gneiss	G97/111-B-6.1	3635	3635	0.000626	0.280434	3.5e-05	-2.2	-1.26675	1.2481				Hiess et al., 2011
Greenland	Itsaq Gneiss Complex	Granitic augen gneiss	G97/111-B-7.1	3635	3635	0.000424	0.280425	3.3e-05	-4	-1.08186	1.17678				Hiess et al., 2011
Greenland	Itsaq Gneiss Complex	Granitic augen gneiss	G97/111-B-8.1	3635	3635	0.000702	0.280443	2.8e-05	-2.5	-1.13612	0.998482				Hiess et al., 2011
Greenland	Itsaq Gneiss Complex	Granitic gneiss	248251-12.1	3686	3686	0.00135	0.280427	3.1e-05	-10.9	-2.15711	1.1056	-0.896444	0.337802	2.00352	Hiess et al., 2011
Greenland	Itsaq Gneiss Complex	Granitic gneiss	248251-20.1	3686	3686	0.000884	0.280445	4.1e-05	-7	-0.331158	1.46224				Hiess et al., 2011
Greenland	Itsaq Gneiss Complex	Granitic gneiss	248251-10.1d	3686	3686	0.001151	0.280469	3.7e-05	0.5	-0.153595	1.31958				Hiess et al., 2011
Greenland	Itsaq Gneiss Complex	Granitic gneiss	248251-10.2d	3686	3686	0.00116	0.280454	3.2e-05	-0.2	-0.711429	1.14126				Hiess et al., 2011
Greenland	Itsaq Gneiss Complex	Granitic gneiss	248251-13.1d	3686	3686	0.000792	0.280417	3.3e-05	-0.7	-1.09601	1.17693				Hiess et al., 2011
Greenland	Itsaq Gneiss Complex	Granitic gneiss	248251-14.1d	3686	3686	0.00085	0.28043	4.9e-05	-0.3	-0.779739	1.74756				Hiess et al., 2011
Greenland	Itsaq Gneiss Complex	Granitic gneiss	248251-18.1d	3686	3686	0.000827	0.280414	2.5e-05	-2	-1.29193	0.891611				Hiess et al., 2011
Greenland	Itsaq Gneiss Complex	Granitic gneiss	248251-22.1d	3686	3686	0.001217	0.280471	4.3e-05	-0.2	-0.249957	1.53357				Hiess et al., 2011
Greenland	Itsaq Gneiss Complex	Granitic gneiss	248251-23.1d	3686	3686	0.001471	0.280479	4.1e-05	-1.3	-0.609996	1.46224				Hiess et al., 2011
Greenland	Itsaq Gneiss Complex	Granitic gneiss	248251-3.1d	3686	3686	0.00095	0.280417	3.2e-05	-1.8	-1.49745	1.14126				Hiess et al., 2011
Greenland	Itsaq Gneiss Complex	Granitic gneiss	248251-4.1d	3686	3686	0.001008	0.280428	3.9e-05	-1	-1.25251	1.39091				Hiess et al., 2011
Greenland	Itsaq Gneiss Complex	Granitic gneiss	248251-8.2d	3686	3686	0.000537	0.280412	4e-05	-0.7	-0.62644	1.42658				Hiess et al., 2011
Greenland	Itsaq Gneiss Complex	Migmatite	195392-6.1	3627	3627	0.00044	0.280477	3.8e-05	-2.6	0.543383	1.35506	-1.8108	0.85902	4.50692	Hiess et al., 2011
Greenland	Itsaq Gneiss Complex	Migmatite	195392-1.1d	3627	3627	0.000436	0.280437	3.3e-05	0.6	-0.872999	1.17676				Hiess et al., 2011
Greenland	Itsaq Gneiss Complex	Migmatite	195392-B-1.1d	3627	3627	0.0007704	0.280475	2.8e-05	0.5	-0.35339	0.998463				Hiess et al., 2011
Greenland	Itsaq Gneiss Complex	Migmatite	195392-B-1.2d	3627	3627	0.0008431	0.280416	2.3e-05	-1.3	-2.63893	0.820166				Hiess et al., 2011
Greenland	Itsaq Gneiss Complex	Migmatite	195392-B-11.1d	3627	3627	0.0012015	0.280424	1.8e-05	-4	-3.24906	0.641869				Hiess et al., 2011
Greenland	Itsaq Gneiss Complex	Migmatite	195392-B-12.1d	3627	3627	0.0004185	0.280416	2.3e-05	-3.3	-1.57813	0.820166				Hiess et al., 2011
Greenland	Itsaq Gneiss Complex	Migmatite	195392-B-4.1d	3627	3627	0.0028683	0.280575	4.6e-05	-1.6	-2.02874	1.64033				Hiess et al., 2011
Greenland	Itsaq Gneiss Complex	Migmatite	195392-B-6.2d	3627	3627	0.0006074	0.280432	2.1e-05	-2	-1.47951	0.748847				Hiess et al., 2011
Greenland	Itsaq Gneiss Complex	Migmatite	195392-B-8.2d	3627	3627	0.000731	0.280371	2.3e-05	-3.9	-3.96353	0.820166				Hiess et al., 2011
Greenland	Itsaq Gneiss Complex	Migmatite	195392-B-8.4d	3627	3627	0.0007966	0.280417	1.9e-05	-2.7	-2.48709	0.677529				Hiess et al., 2011
Greenland	Itsaq Gneiss Complex	Trondhjemitic gneiss	248212-4.1	3690	3690	0.001022	0.280354	3.4e-05	-5.8	-3.83433	1.2126	-1.29697	0.982995	3.90371	Hiess et al., 2011
Greenland	Itsaq Gneiss Complex	Trondhjemitic gneiss	248212-1.1d	3690	3690	0.001108	0.280408	3.4e-05	-2.1	-2.12719	1.2126				Hiess et al., 2011
Greenland	Itsaq Gneiss Complex	Trondhjemitic gneiss	248212-7.1	3690	3690	0.001171	0.280469	3.6e-05	-1.8	-0.111883	1.28393				Hiess et al., 2011
Greenland	Itsaq Gneiss Complex	Trondhjemitic gneiss	248212-2.1d	3690	3690	0.001014	0.280449	3.5e-05	-0.7	-0.425827	1.24827				Hiess et al., 2011
Greenland	Itsaq Gneiss Complex	Trondhjemitic gneiss	248212-3.1d	3690	3690	0.000659	0.280366	3.1e-05	-2.5	-2.48301	1.10561				Hiess et al., 2011
Greenland	Itsaq Gneiss Complex	Trondhjemitic gneiss	248212-5.1d	3690	3690	0.00104	0.280431	3.1e-05	-0.9	-1.13393	1.10561				Hiess et al., 2011
Greenland	Itsaq Gneiss Complex	Trondhjemitic gneiss	248212-6.1d	3690	3690	0.000609	0.280434	3.3e-05	0	0.0693761	1.17694				Hiess et al., 2011
Greenland	Itsaq Gneiss Complex	Trondhjemitic gneiss	248212-9.1d	3690	3690	0.001018	0.280452	3.1e-05	-0.2	-0.329007	1.10561				Hiess et al., 2011
Antarctica	Napier Complex	massive granitic orthogneiss	78285013-Zir #18	3850	3850	0.0009	0.280491	1.3e-05	4.3	5.10186	0.46382	4.20599	1.3365	3.38269	Choi et al., 2006
Antarctica	Napier Complex	massive granitic orthogneiss	78285013-Zir #28	3850	3850	0.0006	0.280505	1e-05	5.6	6.39905	0.356785				Choi et al., 2006
Antarctica	Napier Complex	massive granitic orthogneiss	78285013-Zir #34	3850	3850	0.0009	0.280433	7e-06	2.5	3.03251	0.249749				Choi et al., 2006
Antarctica	Napier Complex	massive granitic orthogneiss	78285013-Zir #5	3850	3850	0.001	0.280453	1.1e-05	2.7	3.48018	0.392463				Choi et al., 2006
Antarctica	Napier Complex	massive granitic orthogneiss	78285013-Zir #5D	3850	3850	0.001	0.28044	1.4e-05	2.7	3.01636	0.499499				Choi et al., 2006
Tarim	Aktash gneisses	tonalitic gneiss	15ALT10-01	3713	3713	0.000835146	0.28043	1.91472e-05	-0.111773	-0.111773	0.68292	-0.650587	0.220558	6.26574	Ge et al., 2018
Tarim	Aktash gneisses	tonalitic gneiss	15ALT10-02	3713	3713	0.000491337	0.280385	1.78487e-05	-0.829238	-0.829238	0.636604				Ge et al., 2018
Tarim	Aktash gneisses	tonalitic gneiss	15ALT10-03	3713	3713	0.000885849	0.280417	1.87536e-05	-0.712501	-0.712501	0.66888				Ge et al., 2018
Tarim	Aktash gneisses	tonalitic gneiss	15ALT10-04	3713	3713	0.000236635	0.280444	1.94747e-05	1.92221	1.92221	0.694599				Ge et al., 2018
Tarim	Aktash gneisses	tonalitic gneiss	15ALT10-05	3713	3713	0.00106524	0.280427	1.76937e-05	-0.796998	-0.796998	0.631076				Ge et al., 2018
Tarim	Aktash gneisses	tonalitic gneiss	15ALT10-06	3713	3713	0.000686291	0.280397	2.01584e-05	-0.910929	-0.910929	0.718986				Ge et al., 2018
Tarim	Aktash gneisses	tonalitic gneiss	15ALT10-09	3713	3713	0.000803564	0.28048	2.12963e-05	1.74159	1.74159	0.759569				Ge et al., 2018
Tarim	Aktash gneisses	tonalitic gneiss	15ALT10-12	3713	3713	0.000718395	0.2804	1.8733e-05	-0.870661	-0.870661	0.668145				Ge et al., 2018
Tarim	Aktash gneisses	tonalitic gneiss	15ALT10-14	3713	3713	0.000640784	0.280433	2.06949e-05	0.500343	0.500343	0.738122				Ge et al., 2018
Tarim	Aktash gneisses	tonalitic gneiss	15ALT10-15	3713	3713	0.000823872	0.280447	1.83883e-05	0.53075	0.53075	0.655852				Ge et al., 2018
Tarim	Aktash gneisses	tonalitic gneiss	15ALT10-16	3713	3713	0.000359661	0.280385	1.81906e-05	-0.486882	-0.486882	0.648798				Ge et al., 2018
Tarim	Aktash gneisses	tonalitic gneiss	15ALT10-18	3713	3713	0.00046224	0.280389	1.7205e-05	-0.614156	-0.614156	0.613647				Ge et al., 2018
Tarim	Aktash gneisses	tonalitic gneiss	15ALT10-24	3713	3713	0.00113693	0.280473	2.18159e-05	0.644653	0.644653	0.778101				Ge et al., 2018
Tarim	Aktash gneisses	tonalitic gneiss	15ALT10-28	3713	3713	0.000980049	0.280455	2.09567e-05	0.424766	0.424766	0.747456				Ge et al., 2018
Tarim	Aktash gneisses	tonalitic gneiss	15ALT10-31	3713	3713	0.00070592	0.280369	2.06677e-05	-1.96799	-1.96799	0.737151				Ge et al., 2018
Tarim	Aktash gneisses	tonalitic gneiss	15ALT10-34	3713	3713	0.000794789	0.280396	1.98813e-05	-1.21163	-1.21163	0.7091				Ge et al., 2018
Tarim	Aktash gneisses	tonalitic gneiss	15ALT10-37	3713	3713	0.000510719	0.280363	1.89779e-05	-1.65419	-1.65419	0.67688				Ge et al., 2018
Tarim	Aktash gneisses	tonalitic gneiss	15ALT10-38	3713	3713	0.000763977	0.280372	2.01047e-05	-1.99482	-1.99482	0.71707				Ge et al., 2018
Tarim	Aktash gneisses	tonalitic gneiss	15ALT10-41	3713	3713	0.000355246	0.280399	1.58081e-05	0.0221479	0.0221479	0.563824				Ge et al., 2018
Tarim	Aktash gneisses	tonalitic gneiss	15ALT10-42	3713	3713	0.000815376	0.280441	1.94403e-05	0.315745	0.315745	0.693372				Ge et al., 2018
Tarim	Aktash gneisses	tonalitic gneiss	15ALT10-46	3713	3713	0.000667952	0.280397	2.04281e-05	-0.84407	-0.84407	0.728603				Ge et al., 2018
Tarim	Aktash gneisses	tonalitic gneiss	15ALT10-47	3713	3713	0.000235654	0.280359	1.68853e-05	-1.09969	-1.09969	0.602245				Ge et al., 2018
Tarim	Aktash gneisses	tonalitic gneiss	15ALT10-49	3713	3713	0.000442058	0.280385	1.86332e-05	-0.708139	-0.708139	0.664586				Ge et al., 2018
Tarim	Aktash gneisses	tonalitic gneiss	15ALT10-51	3713	3713	0.000472645	0.280385	1.58751e-05	-0.791766	-0.791766	0.566214				Ge et al., 2018
Tarim	Aktash gneisses	tonalitic gneiss	15ALT10-52	3713	3713	0.000594529	0.280423	1.75971e-05	0.248116	0.248116	0.627631				Ge et al., 2018
Tarim	Aktash gneisses	tonalitic gneiss	15ALT10-55	3713	3713	0.000293503	0.280369	1.69617e-05	-0.909686	-0.909686	0.604967				Ge et al., 2018
Tarim	Aktash gneisses	tonalitic gneiss	15ALT10-58	3713	3713	0.000556781	0.280396	1.95164e-05	-0.600879	-0.600879	0.696086				Ge et al., 2018
Tarim	Aktash gneisses	tonalitic gneiss	15ALT10-71	3713	3713	0.000720011	0.280361	1.93073e-05	-2.28232	-2.28232	0.688628				Ge et al., 2018
Tarim	Aktash gneisses	tonalitic gneiss	15ALT10-74	3713	3713	0.000528015	0.28041	2.10565e-05	-0.0414389	-0.0414389	0.751017				Ge et al., 2018
Tarim	Aktash gneisses	tonalitic gneiss	15ALT10-77	3713	3713	0.000581598	0.280401	1.82065e-05	-0.503986	-0.503986	0.649368				Ge et al., 2018
Tarim	Aktash gneisses	tonalitic gneiss	15ALT10-79	3713	3713	0.000602922	0.280415	2.46456e-05	-0.0629915	-0.0629915	0.879029				Ge et al., 2018
Tarim	Aktash gneisses	tonalitic gneiss	15ALT10-82	3713	3713	0.000977379	0.280417	2.11638e-05	-0.928119	-0.928119	0.754843				Ge et al., 2018
Tarim	Aktash gneisses	tonalitic gneiss	15ALT10-83	3713	3713	0.00060923	0.28039	1.64319e-05	-0.969771	-0.969771	0.586074				Ge et al., 2018
Tarim	Aktash gneisses	tonalitic gneiss	15ALT10-87	3713	3713	0.000739721	0.280384	1.76154e-05	-1.49168	-1.49168	0.628285				Ge et al., 2018
Tarim	Aktash gneisses	tonalitic gneiss	15ALT10-07	3713	3713	0.000409662	0.280361	1.82572e-05	-1.48713	-1.48713	0.651175				Ge et al., 2018
Tarim	Aktash gneisses	tonalitic gneiss	15ALT10-08	3713	3713	0.000229326	0.280352	1.79008e-05	-1.33134	-1.33134	0.638464				Ge et al., 2018
Tarim	Aktash gneisses	tonalitic gneiss	15ALT10-13	3713	3713	0.000308072	0.280471	2.34402e-05	2.6914	2.6914	0.836037				Ge et al., 2018
Tarim	Aktash gneisses	tonalitic gneiss	15ALT10-17	3713	3713	0.000253965	0.280442	2.13157e-05	1.8159	1.8159	0.760263				Ge et al., 2018
Tarim	Aktash gneisses	tonalitic gneiss	15ALT10-19	3713	3713	0.000159832	0.280347	1.81463e-05	-1.34909	-1.34909	0.647221				Ge et al., 2018
Tarim	Aktash gneisses	tonalitic gneiss	15ALT10-22	3713	3713	0.000446703	0.280394	1.73683e-05	-0.388453	-0.388453	0.619471				Ge et al., 2018
Tarim	Aktash gneisses	tonalitic gneiss	15ALT10-25	3713	3713	0.000279928	0.280411	1.81293e-05	0.620677	0.620677	0.646614				Ge et al., 2018
Tarim	Aktash gneisses	tonalitic gneiss	15ALT10-27	3713	3713	0.000337788	0.280376	1.57347e-05	-0.779391	-0.779391	0.561205				Ge et al., 2018
Tarim	Aktash gneisses	tonalitic gneiss	15ALT10-30	3713	3713	0.000485107	0.280392	1.77922e-05	-0.570093	-0.570093	0.634591				Ge et al., 2018
Tarim	Aktash gneisses	tonalitic gneiss	15ALT10-33	3713	3713	0.000260552	0.280378	1.70357e-05	-0.49389	-0.49389	0.607607				Ge et al., 2018
Tarim	Aktash gneisses	tonalitic gneiss	15ALT10-35	3713	3713	0.000338902	0.280386	1.6075e-05	-0.408778	-0.408778	0.573343				Ge et al., 2018
Tarim	Aktash gneisses	tonalitic gneiss	15ALT10-43	3713	3713	0.0010704	0.280443	1.97662e-05	-0.265257	-0.265257	0.704997				Ge et al., 2018
Tarim	Aktash gneisses	tonalitic gneiss	15ALT10-44	3713	3713	0.000490643	0.280387	1.92257e-05	-0.779577	-0.779577	0.68572				Ge et al., 2018
Tarim	Aktash gneisses	tonalitic gneiss	15ALT10-53	3713	3713	0.00029472	0.280359	1.94389e-05	-1.24474	-1.24474	0.693322				Ge et al., 2018
Tarim	Aktash gneisses	tonalitic gneiss	15ALT10-54	3713	3713	0.000255174	0.280372	1.56133e-05	-0.700705	-0.700705	0.556877				Ge et al., 2018
Tarim	Aktash gneisses	tonalitic gneiss	15ALT10-57	3713	3713	0.000302256	0.28038	2.09208e-05	-0.534919	-0.534919	0.746178				Ge et al., 2018
Tarim	Aktash gneisses	tonalitic gneiss	15ALT10-59	3713	3713	0.000393584	0.28038	1.87009e-05	-0.765523	-0.765523	0.667001				Ge et al., 2018
Tarim	Aktash gneisses	tonalitic gneiss	15ALT10-60	3713	3713	0.00035391	0.280376	1.7461e-05	-0.811587	-0.811587	0.622778				Ge et al., 2018
Tarim	Aktash gneisses	tonalitic gneiss	15ALT10-61	3713	3713	0.000489619	0.280375	1.76711e-05	-1.19778	-1.19778	0.630271				Ge et al., 2018
Tarim	Aktash gneisses	tonalitic gneiss	15ALT10-62	3713	3713	0.00033009	0.280324	1.75659e-05	-2.58821	-2.58821	0.626519				Ge et al., 2018
Tarim	Aktash gneisses	tonalitic gneiss	15ALT10-64	3713	3713	0.000425449	0.280385	1.55608e-05	-0.658494	-0.658494	0.555004				Ge et al., 2018
Tarim	Aktash gneisses	tonalitic gneiss	15ALT10-65	3713	3713	0.000302568	0.280355	1.76608e-05	-1.40912	-1.40912	0.629902				Ge et al., 2018
Tarim	Aktash gneisses	tonalitic gneiss	15ALT10-66	3713	3713	0.000240627	0.280373	1.96362e-05	-0.604082	-0.604082	0.700359				Ge et al., 2018
Tarim	Aktash gneisses	tonalitic gneiss	15ALT10-68	3713	3713	0.000645107	0.280423	1.98626e-05	0.112723	0.112723	0.708434				Ge et al., 2018
Tarim	Aktash gneisses	tonalitic gneiss	15ALT10-69	3713	3713	0.000383984	0.280393	1.73905e-05	-0.275805	-0.275805	0.620263				Ge et al., 2018
Tarim	Aktash gneisses	tonalitic gneiss	15ALT10-73	3713	3713	0.000471933	0.280406	1.99563e-05	-0.0388926	-0.0388926	0.711777				Ge et al., 2018
Tarim	Aktash gneisses	tonalitic gneiss	15ALT10-75	3713	3713	0.000274983	0.280376	1.86741e-05	-0.593014	-0.593014	0.666043				Ge et al., 2018
Tarim	Aktash gneisses	tonalitic gneiss	15ALT10-78	3713	3713	0.000472471	0.280391	1.89665e-05	-0.586934	-0.586934	0.676472				Ge et al., 2018
Tarim	Aktash gneisses	tonalitic gneiss	15ALT10-80	3713	3713	0.000288876	0.280382	2.01635e-05	-0.44118	-0.44118	0.719168				Ge et al., 2018
Tarim	Aktash gneisses	tonalitic gneiss	15ALT10-84	3713	3713	0.000300552	0.280394	1.73547e-05	-0.0432295	-0.0432295	0.618985				Ge et al., 2018
Tarim	Aktash gneisses	tonalitic gneiss	15ALT10-85	3713	3713	0.00028896	0.280395	1.74217e-05	0.0337593	0.0337593	0.621375				Ge et al., 2018
Tarim	Aktash gneisses	tonalitic gneiss	15ALT10-86	3713	3713	0.000379607	0.280391	2.02639e-05	-0.328359	-0.328359	0.722748				Ge et al., 2018
Tarim	Aktash gneisses	tonalitic gneiss	15ALT10-90	3713	3713	0.000371002	0.280373	2.41409e-05	-0.938646	-0.938646	0.861026				Ge et al., 2018
Tarim	Aktash gneisses	tonalitic gneiss	15ALT10-91	3713	3713	0.000558349	0.280414	2.30857e-05	0.029998	0.029998	0.823391				Ge et al., 2018
Tarim	Aktash gneisses	tonalitic gneiss	15ALT10-1.1	3713	3713	0.000502725	0.280357	2.71965e-05	-1.87224	-1.87224	0.970013				Ge et al., 2018
Tarim	Aktash gneisses	tonalitic gneiss	15ALT10-1.2	3713	3713	0.000824291	0.280332	2.39695e-05	-3.57434	-3.57434	0.854915				Ge et al., 2018
Tarim	Aktash gneisses	tonalitic gneiss	15ALT10-4.1	3713	3713	0.000357534	0.280342	2.48559e-05	-2.04056	-2.04056	0.886531				Ge et al., 2018
Tarim	Aktash gneisses	tonalitic gneiss	15ALT10-6.1	3713	3713	0.000827735	0.280379	2.67806e-05	-1.90556	-1.90556	0.955175				Ge et al., 2018
Tarim	Aktash gneisses	tonalitic gneiss	15ALT10-7.1	3713	3713	0.000955195	0.280428	2.98339e-05	-0.480668	-0.480668	1.06408				Ge et al., 2018
Tarim	Aktash gneisses	tonalitic gneiss	15ALT10-8.2	3713	3713	0.00063661	0.280369	3.26026e-05	-1.77328	-1.77328	1.16283				Ge et al., 2018
Tarim	Aktash gneisses	tonalitic gneiss	15ALT10-9.1	3713	3713	0.000652712	0.280434	3.10567e-05	0.501648	0.501648	1.10769				Ge et al., 2018
Tarim	Aktash gneisses	tonalitic gneiss	15ALT10-17.1	3713	3713	0.000747993	0.280389	2.68824e-05	-1.35747	-1.35747	0.958808				Ge et al., 2018
Tarim	Aktash gneisses	tonalitic gneiss	15ALT10-17.2	3713	3713	0.000765388	0.280394	2.90881e-05	-1.23244	-1.23244	1.03748				Ge et al., 2018
Tarim	Aktash gneisses	tonalitic gneiss	15ALT10-20.1	3713	3713	0.000404731	0.28038	2.53928e-05	-0.803204	-0.803204	0.905679				Ge et al., 2018
Tarim	Aktash gneisses	tonalitic gneiss	15ALT10-23.1	3713	3713	0.00049649	0.280423	2.86849e-05	0.493721	0.493721	1.0231				Ge et al., 2018
Tarim	Aktash gneisses	tonalitic gneiss	15ALT10-21.1	3713	3713	0.000275787	0.280325	2.11516e-05	-2.43247	-2.43247	0.754409				Ge et al., 2018
Tarim	Aktash gneisses	tonalitic gneiss	15ALT10-3.1	3713	3713	0.000272814	0.280344	2.97393e-05	-1.73186	-1.73186	1.0607				Ge et al., 2018
Tarim	Aktash gneisses	tonalitic gneiss	15ALT10-10.1	3713	3713	0.000288066	0.280312	2.30475e-05	-2.92125	-2.92125	0.822029				Ge et al., 2018
Tarim	Aktash gneisses	tonalitic gneiss	15ALT10-12.1	3713	3713	0.000385384	0.280366	2.46773e-05	-1.22701	-1.22701	0.880159				Ge et al., 2018
Tarim	Aktash gneisses	tonalitic gneiss	15ALT10-12.2	3713	3713	0.000384914	0.280342	2.41608e-05	-2.10243	-2.10243	0.861739				Ge et al., 2018
Tarim	Aktash gneisses	tonalitic gneiss	15ALT10-13.1	3713	3713	0.00071809	0.280424	2.84613e-05	-0.0189643	-0.0189643	1.01512				Ge et al., 2018
Tarim	Aktash gneisses	tonalitic gneiss	15ALT10-24.1	3713	3713	0.00056946	0.280405	2.49848e-05	-0.316894	-0.316894	0.891126				Ge et al., 2018
Tarim	Aktash gneisses	tonalitic gneiss	15ALT10-25.1	3713	3713	0.000673836	0.280457	2.62581e-05	1.25611	1.25611	0.936543				Ge et al., 2018
Tarim	Aktash gneisses	tonalitic gneiss	15ALT10-26.1	3713	3713	0.000457039	0.280396	2.76558e-05	-0.356747	-0.356747	0.986393				Ge et al., 2018
Tarim	Aktash gneisses	opx-bearing tonalitic gneiss	16ALT01-1.1	3713	3713	0.000724384	0.280411	2.08262e-05	-0.508793	-0.508793	0.742803	-1.99584	0.528926	3.96494	Ge et al., 2018
Tarim	Aktash gneisses	opx-bearing tonalitic gneiss	16ALT01-2.1	3713	3713	0.00120397	0.280393	1.81452e-05	-2.37198	-2.37198	0.64718				Ge et al., 2018
Tarim	Aktash gneisses	opx-bearing tonalitic gneiss	16ALT01-2.3	3713	3713	0.00137186	0.280416	2.03345e-05	-1.99	-1.99	0.725265				Ge et al., 2018
Tarim	Aktash gneisses	opx-bearing tonalitic gneiss	16ALT01-3.1	3713	3713	0.000552985	0.280382	1.53894e-05	-1.09873	-1.09873	0.54889				Ge et al., 2018
Tarim	Aktash gneisses	opx-bearing tonalitic gneiss	16ALT01-4.1	3713	3713	0.000522351	0.280333	1.35969e-05	-2.76926	-2.76926	0.484958				Ge et al., 2018
Tarim	Aktash gneisses	opx-bearing tonalitic gneiss	16ALT01-5.1	3713	3713	0.00149331	0.280446	1.95757e-05	-1.21109	-1.21109	0.698202				Ge et al., 2018
Tarim	Aktash gneisses	opx-bearing tonalitic gneiss	16ALT01-6.1	3713	3713	0.000572876	0.280392	1.50797e-05	-0.795298	-0.795298	0.537843				Ge et al., 2018
Tarim	Aktash gneisses	opx-bearing tonalitic gneiss	16ALT01-8.1	3713	3713	0.00033305	0.280337	1.29887e-05	-2.14721	-2.14721	0.463265				Ge et al., 2018
Tarim	Aktash gneisses	opx-bearing tonalitic gneiss	16ALT01-9.1	3713	3713	0.000418847	0.280313	1.50867e-05	-3.22207	-3.22207	0.538093				Ge et al., 2018
Tarim	Aktash gneisses	opx-bearing tonalitic gneiss	16ALT01-10.1	3713	3713	0.000600073	0.280395	1.5583e-05	-0.74876	-0.74876	0.555795				Ge et al., 2018
Tarim	Aktash gneisses	opx-bearing tonalitic gneiss	16ALT01-11.1	3713	3713	0.000307219	0.280337	1.53881e-05	-2.06949	-2.06949	0.548843				Ge et al., 2018
Tarim	Aktash gneisses	opx-bearing tonalitic gneiss	16ALT01-12.1	3713	3713	0.000665656	0.280364	1.70238e-05	-2.03035	-2.03035	0.607182				Ge et al., 2018
Tarim	Aktash gneisses	opx-bearing tonalitic gneiss	16ALT01-13.1	3713	3713	0.000346947	0.280332	1.42435e-05	-2.36359	-2.36359	0.50802				Ge et al., 2018
Tarim	Aktash gneisses	opx-bearing tonalitic gneiss	16ALT01-15.1	3713	3713	0.00106164	0.280359	1.62139e-05	-3.20633	-3.20633	0.578298				Ge et al., 2018
Tarim	Aktash gneisses	opx-bearing tonalitic gneiss	16ALT01-16.1	3713	3713	0.000588538	0.280291	1.6331e-05	-4.44418	-4.44418	0.582473				Ge et al., 2018
Tarim	Aktash gneisses	opx-bearing tonalitic gneiss	16ALT01-2.2	3713	3713	0.000497265	0.28034	1.50759e-05	-2.47285	-2.47285	0.537709				Ge et al., 2018
Tarim	Aktash gneisses	opx-bearing tonalitic gneiss	16ALT01-7.1	3713	3713	0.000492348	0.280395	1.67433e-05	-0.479238	-0.479238	0.597178				Ge et al., 2018
Tarim	Aktash gneisses	tonalitic gneiss	16ALT04-1.1	3713	3713	0.000647494	0.280411	3.24681e-05	-0.304624	-0.304624	1.15803	-1.02349	0.395641	4.06787	Ge et al., 2018
Tarim	Aktash gneisses	tonalitic gneiss	16ALT04-5.4	3713	3713	0.00103764	0.280415	2.61866e-05	-1.17758	-1.17758	0.933992				Ge et al., 2018
Tarim	Aktash gneisses	tonalitic gneiss	16ALT04-5.6	3713	3713	0.000795168	0.280391	2.73269e-05	-1.38633	-1.38633	0.974663				Ge et al., 2018
Tarim	Aktash gneisses	tonalitic gneiss	16ALT04-2.1	3713	3713	0.000291042	0.280341	2.2104e-05	-1.88456	-1.88456	0.788378				Ge et al., 2018
Tarim	Aktash gneisses	tonalitic gneiss	16ALT04-4.1	3713	3713	0.000386377	0.280326	2.10739e-05	-2.65721	-2.65721	0.751637				Ge et al., 2018
Tarim	Aktash gneisses	tonalitic gneiss	16ALT04-7.1	3713	3713	0.000963197	0.280458	2.88342e-05	0.574822	0.574822	1.02842				Ge et al., 2018
Tarim	Aktash gneisses	tonalitic gneiss	16ALT04-8.1	3713	3713	0.00021165	0.280304	2.51941e-05	-3.01674	-3.01674	0.898592				Ge et al., 2018
Tarim	Aktash gneisses	tonalitic gneiss	16ALT04-16.1	3713	3713	0.000276303	0.280409	2.66129e-05	0.566885	0.566885	0.949197				Ge et al., 2018
Tarim	Aktash gneisses	tonalitic gneiss	16ALT04-16.2	3713	3713	0.000488695	0.280409	2.97864e-05	0.0315866	0.0315866	1.06238				Ge et al., 2018
Tarim	Aktash gneisses	tonalitic gneiss	16ALT04-18.1	3713	3713	0.000434302	0.28036	2.49407e-05	-1.58057	-1.58057	0.889555				Ge et al., 2018
Tarim	Aktash gneisses	tonalitic gneiss	16ALT04-19.3	3713	3713	0.00105248	0.280406	3.42195e-05	-1.5352	-1.5352	1.2205				Ge et al., 2018
Tarim	Aktash gneisses	tonalitic gneiss	16ALT04-19.5	3713	3713	0.00128193	0.280428	2.98672e-05	-1.31191	-1.31191	1.06527				Ge et al., 2018
Tarim	Aktash gneisses	tonalitic gneiss	16ALT04-20.1	3713	3713	0.000283463	0.280347	2.18248e-05	-1.66221	-1.66221	0.778421				Ge et al., 2018
Tarim	Aktash gneisses	tonalitic gneiss	16ALT04-21.1	3713	3713	0.00129392	0.280496	2.71529e-05	1.05113	1.05113	0.968456				Ge et al., 2018
Tarim	Aktash gneisses	tonalitic gneiss	16ALT04-9.1	3713	3713	0.000671414	0.280381	2.70216e-05	-1.43475	-1.43475	0.963773				Ge et al., 2018
Tarim	Aktash gneisses	tonalitic gneiss	16ALT04-10.1	3713	3713	0.000379505	0.280364	2.44974e-05	-1.29775	-1.29775	0.873744				Ge et al., 2018
Tarim	Aktash gneisses	tonalitic gneiss	16ALT04-11.1	3713	3713	0.000439663	0.280359	2.20354e-05	-1.63645	-1.63645	0.785932				Ge et al., 2018
Tarim	Aktash gneisses	tonalitic gneiss	16ALT04-13.1	3713	3713	0.000369402	0.280362	2.50243e-05	-1.3584	-1.3584	0.892535				Ge et al., 2018
Tarim	Aktash gneisses	tonalitic gneiss	16ALT04-14.1	3713	3713	0.000391335	0.280361	2.50922e-05	-1.42403	-1.42403	0.894956				Ge et al., 2018
Tarim	Aktash gneisses	tonalitic gneiss	16ALT04-15.1	3713	3713	0.000503441	0.280415	2.3235e-05	0.216323	0.216323	0.828719				Ge et al., 2018
Tarim	Aktash gneisses	tonalitic gneiss	16ALT04-15.2	3713	3713	0.000448502	0.280381	2.45909e-05	-0.867475	-0.867475	0.877079				Ge et al., 2018
Tarim	Aktash gneisses	tonalitic gneiss	16ALT04-17.1	3713	3713	0.00031736	0.280356	2.37678e-05	-1.43357	-1.43357	0.84772				Ge et al., 2018
Tarim	Aktash gneisses	tonalitic gneiss	16ALT04-19.1	3713	3713	0.000428637	0.280405	2.53567e-05	0.0510661	0.0510661	0.904391				Ge et al., 2018
Tarim	Aktash gneisses	tonalitic gneiss	16ALT04-22.1	3713	3713	0.000333932	0.280373	2.49539e-05	-0.854099	-0.854099	0.890023				Ge et al., 2018
Tarim	Aktash gneisses	tonalitic gneiss	16ALT04-23.1	3713	3713	0.000291399	0.280359	2.11661e-05	-1.25563	-1.25563	0.754926				Ge et al., 2018
Tarim	Aktash gneisses	opx-bearing tonalitic gneiss	16ALT05-1.1	3713	3713	0.00103798	0.280368	3.08165e-05	-2.82381	-2.82381	1.09913	-0.475029	0.71	6.67453	Ge et al., 2018
Tarim	Aktash gneisses	opx-bearing tonalitic gneiss	16ALT05-2.2	3713	3713	0.00120817	0.280404	2.90482e-05	-1.97926	-1.97926	1.03605				Ge et al., 2018
Tarim	Aktash gneisses	opx-bearing tonalitic gneiss	16ALT05-3.1	3713	3713	0.000954363	0.280454	3.14175e-05	0.454964	0.454964	1.12056				Ge et al., 2018
Tarim	Aktash gneisses	opx-bearing tonalitic gneiss	16ALT05-4.1	3713	3713	0.000627301	0.28039	2.78478e-05	-1.00467	-1.00467	0.993241				Ge et al., 2018
Tarim	Aktash gneisses	opx-bearing tonalitic gneiss	16ALT05-5.1	3713	3713	0.000716169	0.280396	2.61802e-05	-1.01246	-1.01246	0.933761				Ge et al., 2018
Tarim	Aktash gneisses	opx-bearing tonalitic gneiss	16ALT05-6.1	3713	3713	0.00117424	0.2805	3.21686e-05	1.52184	1.52184	1.14735				Ge et al., 2018
Tarim	Aktash gneisses	opx-bearing tonalitic gneiss	16ALT05-6.2	3713	3713	0.00117103	0.280498	3.34848e-05	1.45485	1.45485	1.19429				Ge et al., 2018
Tarim	Aktash gneisses	opx-bearing tonalitic gneiss	16ALT05-7.1	3713	3713	0.000922736	0.28046	2.64426e-05	0.750307	0.750307	0.943121				Ge et al., 2018
Tarim	Aktash gneisses	opx-bearing tonalitic gneiss	16ALT05-7.2	3713	3713	0.0011639	0.280477	2.77249e-05	0.714848	0.714848	0.988856				Ge et al., 2018
Tarim	Aktash gneisses	opx-bearing tonalitic gneiss	16ALT05-7.3	3713	3713	0.00136253	0.280485	3.37922e-05	0.511676	0.511676	1.20526				Ge et al., 2018
Tarim	Aktash gneisses	opx-bearing tonalitic gneiss	16ALT05-9.1	3713	3713	0.000365461	0.280385	2.28014e-05	-0.530927	-0.530927	0.813251				Ge et al., 2018
Tarim	Aktash gneisses	opx-bearing tonalitic gneiss	16ALT05-10.1	3713	3713	0.000694007	0.280394	2.40394e-05	-1.03695	-1.03695	0.857406				Ge et al., 2018
Tarim	Aktash gneisses	opx-bearing tonalitic gneiss	16ALT05-11.1	3713	3713	0.000504655	0.280396	2.16462e-05	-0.493538	-0.493538	0.77205				Ge et al., 2018
Tarim	Aktash gneisses	opx-bearing tonalitic gneiss	16ALT05-12.1	3713	3713	0.000573584	0.280367	2.66852e-05	-1.67857	-1.67857	0.951775				Ge et al., 2018
Tarim	Aktash gneisses	opx-bearing tonalitic gneiss	16ALT05-13.1	3713	3713	0.00080958	0.280468	2.74248e-05	1.30471	1.30471	0.978153				Ge et al., 2018
Tarim	Aktash gneisses	opx-bearing tonalitic gneiss	16ALT05-14.1	3713	3713	0.000776202	0.280306	2.48491e-05	-4.37223	-4.37223	0.886285				Ge et al., 2018
Tarim	Aktash gneisses	opx-bearing tonalitic gneiss	16ALT05-15.1	3713	3713	0.00149791	0.280545	3.35924e-05	2.3023	2.3023	1.19813				Ge et al., 2018
Tarim	Aktash gneisses	opx-bearing tonalitic gneiss	16ALT05-15.4	3713	3713	0.00128844	0.280444	2.91045e-05	-0.764538	-0.764538	1.03806				Ge et al., 2018
Tarim	Aktash gneisses	opx-bearing tonalitic gneiss	16ALT05-16.1	3713	3713	0.00117453	0.280401	2.92974e-05	-1.99641	-1.99641	1.04494				Ge et al., 2018
Tarim	Aktash gneisses	opx-bearing tonalitic gneiss	16ALT05-17.1	3713	3713	0.000752763	0.280385	3.03453e-05	-1.49849	-1.49849	1.08232				Ge et al., 2018
Tarim	Aktash gneisses	opx-bearing tonalitic gneiss	16ALT05-18.1	3713	3713	0.000607388	0.280422	2.9842e-05	0.200755	0.200755	1.06437				Ge et al., 2018
Tarim	Aktash gneisses	altered tonalitic gneiss	16ALT08-2.1	3713	3713	0.000430687	0.280405	2.26589e-05	0.0406145	0.0406145	0.808168	0.670607	1.1455	6.39072	Ge et al., 2018
Tarim	Aktash gneisses	altered tonalitic gneiss	16ALT08-3.1	3713	3713	0.00048194	0.280442	2.76889e-05	1.21411	1.21411	0.987573				Ge et al., 2018
Tarim	Aktash gneisses	altered tonalitic gneiss	16ALT08-6.1	3713	3713	0.00141097	0.280547	3.68776e-05	2.57544	2.57544	1.3153				Ge et al., 2018
Tarim	Aktash gneisses	altered tonalitic gneiss	16ALT08-13.1	3713	3713	0.000880404	0.280505	2.39636e-05	2.4574	2.4574	0.854704				Ge et al., 2018
Tarim	Aktash gneisses	altered tonalitic gneiss	16ALT08-14.2	3713	3713	0.00114217	0.280503	2.74116e-05	1.72336	1.72336	0.977684				Ge et al., 2018
Tarim	Aktash gneisses	altered tonalitic gneiss	16ALT08-14.3	3713	3713	0.00117819	0.280472	3.02989e-05	0.499542	0.499542	1.08066				Ge et al., 2018
Tarim	Aktash gneisses	altered tonalitic gneiss	16ALT08-16.2	3713	3713	0.00223765	0.280427	3.0279e-05	-3.81528	-3.81528	1.07995				Ge et al., 2018
Tarim	Aktash gneisses	altered tonalitic gneiss	16ALT08-17.1	3713	3713	0.00102939	0.28047	2.658e-05	0.810029	0.810029	0.948021				Ge et al., 2018
Tarim	Aktash gneisses	altered tonalitic gneiss	16ALT08-18.1	3713	3713	0.00073172	0.280459	2.46199e-05	1.20063	1.20063	0.878113				Ge et al., 2018
Tarim	Aktash gneisses	altered tonalitic gneiss	16ALT08-20.1	3713	3713	0.000548109	0.280413	3.06725e-05	0.000208744	0.000208744	1.09399				Ge et al., 2018
Tarim	Aktash gneisses	tonalitic gneiss	16ALT67_1_1	3720	3720	0.000734708	0.280366	1.80982e-05	-1.96162	-1.96162	0.645517	-0.935428	0.335987	1.98644	Ge et al., 2020
Tarim	Aktash gneisses	tonalitic gneiss	16ALT67_2_1	3720	3720	0.000632791	0.280364	1.83012e-05	-1.79267	-1.79267	0.652756				Ge et al., 2020
Tarim	Aktash gneisses	tonalitic gneiss	16ALT67_3_1	3720	3720	0.00087988	0.280395	1.94945e-05	-1.30333	-1.30333	0.695317				Ge et al., 2020
Tarim	Aktash gneisses	tonalitic gneiss	16ALT67_4_1	3720	3720	0.000700991	0.280407	1.82089e-05	-0.407397	-0.407397	0.649462				Ge et al., 2020
Tarim	Aktash gneisses	tonalitic gneiss	16ALT67_5_1	3720	3720	0.000415316	0.280386	1.4594e-05	-0.452725	-0.452725	0.520528				Ge et al., 2020
Tarim	Aktash gneisses	tonalitic gneiss	16ALT67_7	3720	3720	0.000365466	0.28037	1.57497e-05	-0.89407	-0.89407	0.561751				Ge et al., 2020
Tarim	Aktash gneisses	tonalitic gneiss	16ALT67_8	3720	3720	0.00051968	0.280381	1.6502e-05	-0.888584	-0.888584	0.588583				Ge et al., 2020
Tarim	Aktash gneisses	tonalitic gneiss	16ALT67_9	3720	3720	0.000644408	0.280357	1.65595e-05	-2.05175	-2.05175	0.590634				Ge et al., 2020
Tarim	Aktash gneisses	tonalitic gneiss	16ALT67_10_1	3720	3720	0.000186877	0.280369	1.52214e-05	-0.474964	-0.474964	0.542907				Ge et al., 2020
Tarim	Aktash gneisses	tonalitic gneiss	16ALT67_11	3720	3720	0.00038978	0.280384	1.72559e-05	-0.434979	-0.434979	0.615473				Ge et al., 2020
Tarim	Aktash gneisses	tonalitic gneiss	16ALT67_12_1	3720	3720	0.000365752	0.280378	1.6619e-05	-0.612418	-0.612418	0.592754				Ge et al., 2020
Tarim	Aktash gneisses	tonalitic gneiss	16ALT67_13_1	3720	3720	0.0016157	0.280438	1.91658e-05	-1.66559	-1.66559	0.683593				Ge et al., 2020
Tarim	Aktash gneisses	tonalitic gneiss	16ALT67_15	3720	3720	0.000357059	0.280392	1.53622e-05	-0.0653064	-0.0653064	0.54793				Ge et al., 2020
Tarim	Aktash gneisses	tonalitic gneiss	16ALT67_16	3720	3720	0.000321429	0.280374	1.51747e-05	-0.630155	-0.630155	0.541243				Ge et al., 2020
Tarim	Aktash gneisses	tonalitic gneiss	16ALT67_17	3720	3720	0.000562306	0.280398	1.79374e-05	-0.395849	-0.395849	0.639781				Ge et al., 2020
Tarim	Aktash gneisses	opx-bearing tonalitic gneiss	16ALT68_1_1	3720	3720	0.000955344	0.280402	1.79345e-05	-1.26812	-1.26812	0.639675	-0.642326	0.394437	2.97424	Ge et al., 2020
Tarim	Aktash gneisses	opx-bearing tonalitic gneiss	16ALT68_2_1	3720	3720	0.000893155	0.280426	2.06555e-05	-0.228626	-0.228626	0.736728				Ge et al., 2020
Tarim	Aktash gneisses	opx-bearing tonalitic gneiss	16ALT68_2_4	3720	3720	0.000905102	0.280412	2.33637e-05	-0.772531	-0.772531	0.833321				Ge et al., 2020
Tarim	Aktash gneisses	opx-bearing tonalitic gneiss	16ALT68_3_1	3720	3720	0.000676451	0.280401	2.3541e-05	-0.557807	-0.557807	0.839644				Ge et al., 2020
Tarim	Aktash gneisses	opx-bearing tonalitic gneiss	16ALT68_3_3	3720	3720	0.000866817	0.28041	2.2973e-05	-0.749728	-0.749728	0.819385				Ge et al., 2020
Tarim	Aktash gneisses	opx-bearing tonalitic gneiss	16ALT68_4_1	3720	3720	0.000465999	0.280416	1.94738e-05	0.512731	0.512731	0.694579				Ge et al., 2020
Tarim	Aktash gneisses	opx-bearing tonalitic gneiss	16ALT68_5_1	3720	3720	0.000510159	0.28036	1.69188e-05	-1.62168	-1.62168	0.60345				Ge et al., 2020
Tarim	Aktash gneisses	opx-bearing tonalitic gneiss	16ALT68_6_1	3720	3720	0.000886144	0.280383	1.83607e-05	-1.74242	-1.74242	0.654879				Ge et al., 2020
Tarim	Aktash gneisses	opx-bearing tonalitic gneiss	16ALT68_6_2	3720	3720	0.00108054	0.280403	2.06871e-05	-1.54914	-1.54914	0.737855				Ge et al., 2020
Tarim	Aktash gneisses	opx-bearing tonalitic gneiss	16ALT68_8_1	3720	3720	0.000294332	0.280338	1.84033e-05	-1.84389	-1.84389	0.656399				Ge et al., 2020
Tarim	Aktash gneisses	opx-bearing tonalitic gneiss	16ALT68_8_2	3720	3720	0.000402979	0.280359	1.9651e-05	-1.35988	-1.35988	0.7009				Ge et al., 2020
Tarim	Aktash gneisses	opx-bearing tonalitic gneiss	16ALT68_9_1	3720	3720	0.0006863	0.280387	1.55842e-05	-1.11488	-1.11488	0.555849				Ge et al., 2020
Tarim	Aktash gneisses	opx-bearing tonalitic gneiss	16ALT68_10_1	3720	3720	0.000936259	0.280422	1.73578e-05	-0.4873	-0.4873	0.619106				Ge et al., 2020
Tarim	Aktash gneisses	opx-bearing tonalitic gneiss	16ALT68_10_3	3720	3720	0.000590563	0.280401	1.8882e-05	-0.367233	-0.367233	0.67347				Ge et al., 2020
Tarim	Aktash gneisses	opx-bearing tonalitic gneiss	16ALT68_11_1	3720	3720	0.000437323	0.280432	1.98764e-05	1.13035	1.13035	0.708938				Ge et al., 2020
Tarim	Aktash gneisses	opx-bearing tonalitic gneiss	16ALT68_12_1	3720	3720	0.000214279	0.280414	1.51541e-05	1.07794	1.07794	0.540506				Ge et al., 2020
Tarim	Aktash gneisses	opx-bearing tonalitic gneiss	16ALT68_13_1	3720	3720	0.00076529	0.2804	1.74242e-05	-0.84291	-0.84291	0.621474				Ge et al., 2020
Tarim	Aktash gneisses	opx-bearing tonalitic gneiss	16ALT68_14_1	3720	3720	0.000659598	0.280436	2.22644e-05	0.729026	0.729026	0.794111				Ge et al., 2020
Tarim	Aktash gneisses	opx-bearing tonalitic gneiss	16ALT68_15_2	3720	3720	0.00102057	0.280404	2.03821e-05	-1.35183	-1.35183	0.726977				Ge et al., 2020
Tarim	Aktash gneisses	opx-bearing tonalitic gneiss	16ALT68_15_3	3720	3720	0.000598596	0.280381	1.95108e-05	-1.08058	-1.08058	0.695897				Ge et al., 2020
Tarim	Aktash gneisses	opx-bearing tonalitic gneiss	16ALT68_17_1	3720	3720	0.000245929	0.280386	1.67886e-05	-0.000353863	-0.000353863	0.598804				Ge et al., 2020
Notes:
a: Hf isotopic compositions of all types of granitoids around the world are compiled in this table, however, potassic granites are not shown in Fig. 2B. Unlike TTGs, most of them are not derived from partial melting of mantle-derived rocks.
b: Weighted mean 207Pb/206Pb ages are used for εHf(t) calculation.
c: Parameters for recalculating εHf(t) values: 176Lu/177Hf = 0.282785, 176Lu/177Hf = 0.0336 for CHUR (Bouvier et al., 2008), decay constant of 176Lu = 1.867 × 10-11 y-1 (Söderlund et al., 2004).
d: 2SE values were cacluated for all samples, however, only the samples with 2SE <1 and the variation range of εHf(t) value <8 are shown in Fig. 2b, because larger 2SE and εHf(t) variations may indicate unreliable analysis or heterogeneous source.
References:
Amelin, Y., Lee, D.-C., Halliday, A.N., 2000. Early-middle archaean crustal evolution deduced from Lu-Hf and U-Pb isotopic studies of single zircon grains. Geochimica et Cosmochimica Acta 64, 4205-4225.
Amelin, Y., Kamo, S.L., Lee, D.-C., 2011. Evolution of early crust in chondritic or non-chondritic Earth inferred from U–Pb and Lu–Hf data for chemically abraded zircon from the Itsaq Gneiss Complex, West Greenland. Canadian Journal of Earth Sciences 48, 141-160.
Augland, L.E., David, J., 2015. Protocrustal evolution of the Nuvvuagittuq Supracrustal Belt as determined by high precision zircon Lu–Hf and U–Pb isotope data. Earth and Planetary Science Letters 428, 162-171.
Choi, S.H., Mukasa, S.B., Andronikov, A.V., Osanai, Y., Harley, S.L., Kelly, N.M., 2006. Lu–Hf systematics of the ultra-high temperature Napier Metamorphic Complex in Antarctica: Evidence for the early Archean differentiation of Earth's mantle. Earth and Planetary Science Letters 246, 305-316.
Dong, C., Liu, S., Nutman, A.P., Li, P., Xie, H., Li, Y., Liu, D., Wan, Y., 2024. New discovery of 3.84–3.64 Ga diverse granitoids in eastern Hebei, North China Craton: Petrogenesis and significance. GSA Bulletin 136, 5249-5261.
dos Santos, C., Zincone, S.A., Queiroga, G.N., Bersan, S.M., Lana, C.C., Oliveira, E.P., 2022. Evidence for change in crust formation process during the Paleoarchean in the São Francisco Craton (Gavião Block): Coupled zircon Lu-Hf and U-Pb isotopic analyses and tectonic implications. Precambrian Research 368, 106472.
Ge, R., Zhu, W., Wilde, S.A., Wu, H., 2018. Remnants of Eoarchean continental crust derived from a subducted proto-arc. Science Advances 4, eaao3159.
Ge, R., Wilde, S.A., Kemp, A.I.S., Jeon, H., Martin, L.A.J., Zhu, W., Wu, H., 2020. Generation of Eoarchean continental crust from altered mafic rocks derived from a chondritic mantle: The ~3.72 Ga Aktash gneisses, Tarim Craton (NW China). Earth and Planetary Science Letters 538, 116225.
Guitreau, M., Blichert-Toft, J., Martin, H., Mojzsis, S.J., Albarède, F., 2012. Hafnium isotope evidence from Archean granitic rocks for deep-mantle origin of continental crust. Earth and Planetary Science Letters 337–338, 211-223.
Hiess, J., Bennett, V.C., Nutman, A.P., Williams, I.S., 2011. Archaean fluid-assisted crustal cannibalism recorded by low δ18O and negative εHf(T) isotopic signatures of West Greenland granite zircon. Contributions to Mineralogy and Petrology 161, 1027-1050.
Hiess, J., Bennett, V.C., Nutman, A.P., Williams, I.S., 2009. In situ U–Pb, O and Hf isotopic compositions of zircon and olivine from Eoarchaean rocks, West Greenland: New insights to making old crust Geochimica et Cosmochimica Acta 73, 4489-4516
Hiess, J., Bennett, V.C., 2016. Chondritic Lu/Hf in the early crust–mantle system as recorded by zircon populations from the oldest Eoarchean rocks of Yilgarn Craton, West Australia and Enderby Land, Antarctica. Chemical geology 427, 125-143.
Kaur, P., Zeh, A., Chaudhri, N., 2014. Characterisation and U–Pb–Hf isotope record of the 3.55Ga felsic crust from the Bundelkhand Craton, northern India. Precambrian Research 255, 236-244.
Kemp, A.I.S., Wilde, S.A., Hawkesworth, C.J., Coath, C.D., Nemchin, A., Pidgeon, R.T., Vervoort, J.D., DuFrane, S.A., 2010. Hadean crustal evolution revisited: New constraints from Pb–Hf isotope systematics of the Jack Hills zircons. Earth and Planetary Science Letters 296, 45-56
Kröner, A., Hoffmann, J.E., Xie, H., Münker, C., Hegner, E., Wan, Y., Hofmann, A., Liu, D., Yang, J., 2014. Generation of early Archaean grey gneisses through melting of older crust in the eastern Kaapvaal craton, southern Africa. Precambrian Research 255, 823-846.
Liu, D., Wilde, S.A., Wan, Y., Wu, J., Zhou, H., Dong, C., Yin, X., 2008. New U-Pb and Hf isotopic data confirm Anshan as the oldest preserved segment of the North China Craton. American Journal of Science 308, 200-231.
Ma, Q., Xu, Y.-G., Huang, X.-L., Zheng, J.-P., Ping, X., Xia, X.-P., 2020. Eoarchean to Paleoproterozoic crustal evolution in the North China Craton: Evidence from U-Pb and Hf-O isotopes of zircons from deep-crustal xenoliths. Geochimica et Cosmochimica Acta 278, 94-109.
Næraa, T., Scherstén, A., Rosing, M.T., Kemp, A.I.S., Hoffmann, J.E., Kokfelt, T.F., Whitehouse, M.J., 2012. Hafnium isotope evidence for a transition in the dynamics of continental growth 3.2 Gyr ago. Nature 485, 627–630.
Oliveira, E.P., McNaughton, N.J., Zincone, S.A., Talavera, C., 2020. Birthplace of the São Francisco Craton, Brazil: Evidence from 3.60 to 3.64 Ga Gneisses of the Mairi Gneiss Complex. Terra Nova 32, 281-289.
OʼNeil, J., Boyet, M., Carlson, R.W., Paquette, J.-L., 2013. Half a billion years of reworking of Hadean mafic crust to produce the Nuvvuagittuq Eoarchean felsic crust. Earth and Planetary Science Letters 379, 13-25.
Ping, X., Zheng, J., Tang, H., Ma, Q., Griffin, W.L., Xiong, Q., Su, Y., 2018. Hadean continental crust in the southern North China Craton: evidence from the Xinyang felsic granulite xenoliths. Precambrian Research 307, 155-174.
Wang, Y.-F., Li, X.-H., Jin, W., Zhang, J.-H., 2015. Eoarchean ultra-depleted mantle domains inferred from ca. 3.81 Ga Anshan trondhjemitic gneisses, North China Craton. Precambrian Research 263, 88–107.
Wu, F.-Y., Zhang, Y.-B., Yang, J.-H., Xie, L.-W., Yang, Y.-H., 2008. Zircon U–Pb and Hf isotopic constraints on the Early Archean crustal evolution in Anshan of the North China Craton. Precambrian Research 167, 339-362

## Sheet: Table S9
Table S9 Thermodynamic and trace element modelling of partial melting using median value of amphibolite group I in the Acasta area as starting material a
Modelling condition		Mineral assemblage (wt.%) b													Modelled magmatic H2O contents (wt.%)	Modelled major element composition of melt (wt.%) c								Modelled trace element composition of melt (ppm) d
P (GPa)	T(℃)	Melt	Clinopyroxene (Cpx)	Orthopyroxene (Opx)	Plagioclase (Pl)	Amphibole (Amph)	Biotite (Bio)	Garnet (Gt)	Quartz (q)	Muscovite (Ms)	Ilmenite (Ilm)	Sphene (Sph)	Epidote (Ep)	Rutile (ru)	H2O	SiO2	TiO2	Al2O3	FeO	MgO	CaO	Na2O	K2O	Cs	Rb	K	Ba	Th	U	Nb	Ta	La	Ce	Pr	Pb	Sr	Nd	Sm	Zr	Hf	Ti	Eu	Gd	Tb	Dy	Y	Ho	Er	Tm
1.2	620	0.15469	8.13757			59.7059	4.93852	8.11242	14.8861			1.54452	2.44603		17.986	72.6922	0	16.3896	0.0445497	0.0093684	0.977392	7.15687	2.72997	0.936119	84.3033	14532.9	156.55	7.65624	2.25184	15.3296	0.400402	12.0968	19.6087	2.02947	19.5	396.158	7.52016	1.49305	183.708	2.29137	1623.46	0.635907	1.62566	0.253735	1.56698	7.86286	0.319884	0.887678	0.131162
1	630	0.038301	8.62277		1.49946	67.3816	4.15833		15.0885			1.37586	1.83515		15.5569	72.9164	0	16.0755	0.0446831	0.00850791	1.27149	6.27596	3.40752	0.887824	92.9574	14394	173.053	8.05388	2.4722	14.352	0.38469	11.8784	19.1426	1.95769	17.167	298.167	7.21937	1.49449	192.236	2.40993	1642.24	0.636371	1.82411	0.313318	2.18399	11.9989	0.509514	1.60937	0.269994
1.1	630	0.0178723	8.8063			65.9313	4.49675	1.26818	15.3917			1.38218	2.70573		16.491	72.6875	0	16.3048	0.0485529	0.00940461	1.11718	6.7876	3.04487	0.898544	89.3225	14336.9	168.963	7.17033	2.16488	14.6649	0.388456	11.5799	18.8092	1.93429	18.3177	371.45	7.16077	1.47521	191.827	2.17989	1644.92	0.638318	1.76749	0.298446	2.03192	10.9489	0.460565	1.41126	0.229033
1.15	630	0.493128	8.53081			62.1614	4.5765	5.72558	15.0842			1.45304	1.97536		16.8586	72.6171	0	16.3724	0.0480496	0.00966785	1.06793	6.91304	2.97183	0.903784	86.4715	14532	166.024	7.78497	2.32658	14.9225	0.394725	12.226	19.7236	2.02792	18.874	395.705	7.49422	1.50292	184.26	2.3998	1637.95	0.643735	1.68696	0.269742	1.71389	8.76863	0.359929	1.02422	0.154703
1.2	630	0.932886	8.46703			58.4974	4.6396	9.87245	14.7993			1.51932	1.27209		17.3416	72.5588	0	16.437	0.0472517	0.00992718	1.01726	7.04121	2.88858	0.910973	84.1626	14754.5	163.781	8.48573	2.51373	15.2054	0.401493	12.9359	20.7139	2.12894	19.4812	422.714	7.85328	1.53312	177.971	2.66069	1633.92	0.650171	1.62143	0.247998	1.49811	7.40721	0.299468	0.816786	0.118919
1.25	630	1.33966	8.82127			55.1767	3.88807	14.1454	14.2695	0.741819		1.61754			17.906	72.5448	0	16.4761	0.0463757	0.0100994	0.969728	7.16138	2.7916	0.942786	84.8142	15195.6	170.152	10.4818	3.12265	13.8305	0.403865	14.2046	22.2657	2.27316	20.6683	470.115	8.33459	1.57432	171.071	3.26333	1569.34	0.660275	1.56538	0.229767	1.32981	6.40233	0.255893	0.677001	0.096181
1.3	630	1.44891	9.31663			52.4563	3.3085	16.6685	13.6767	1.4258		1.68995			18.6744	72.6594	0	16.4451	0.0520221	0.0117277	0.926632	7.25038	2.65484	0.984463	85.3966	15543.2	171.726	10.4163	3.09798	12.7626	0.406616	14.3842	22.5808	2.31522	21.2484	483	8.50564	1.5826	168.664	3.30211	1524.86	0.658951	1.52288	0.218929	1.24136	5.90472	0.234804	0.613112	0.086224
1.35	630	0.551099	10.3922			50.4164	2.28185	18.4695	13.2461	2.68687		1.76626			19.2196	72.7055	0	16.4505	0.0577965	0.0133727	0.879438	7.37796	2.51544	1.12811	91.8069	16240.3	179.144	12.3125	3.74631	11.3746	0.414654	15.0096	23.2291	2.37329	23.8267	511.464	8.69905	1.59524	171.103	3.38281	1449.84	0.660517	1.4979	0.212261	1.1872	5.604	0.222114	0.575198	0.080396
1.4	630	0.177134	11.5005			47.7513	1.33682	20.6859	12.6489	3.75228		1.85159			19.6165	72.7266	0	16.464	0.0651968	0.0153959	0.834917	7.48837	2.40551	1.26309	96.776	16959.7	186.497	13.3728	4.151	10.3528	0.420338	15.4538	23.7626	2.4302	25.8898	536.38	8.91031	1.6086	171.171	3.45159	1393.1	0.661293	1.46733	0.204492	1.12623	5.27107	0.20817	0.534281	0.0741844
0.9	640	0.420649	8.48774		4.06063	67.9191	3.48555		14.2949			1.33146			14.2863	73.2448	0	15.7498	0.0501606	0.00942221	1.55353	5.43496	3.9573	0.872773	99.8048	14739.4	183.468	10.5243	3.36492	13.9999	0.384752	12.8708	20.3894	2.06102	15.6038	227.457	7.54331	1.55192	189.271	3.12783	1656.65	0.639358	1.88991	0.324379	2.25981	12.409	0.526844	1.66264	0.278714
0.95	640	0.347377	8.88778		2.92182	67.902	3.55713		14.7159			1.33274	0.335201		14.5664	72.9869	0	15.9205	0.0500217	0.0092139	1.49909	5.6075	3.92679	0.880406	99.6858	14800.8	187.512	10.0082	3.18938	14.1596	0.385105	12.7778	20.2354	2.04565	16.3911	258.45	7.4911	1.54104	189.744	2.96289	1654.82	0.644234	1.87611	0.321955	2.24256	12.3125	0.522733	1.6497	0.276525
1	640	0.20119	8.98314		1.84231	67.5837	3.82933		15.0412			1.31981	1.19931		14.9137	72.8158	0	16.071	0.049756	0.00946931	1.38177	5.9426	3.72957	0.887807	96.9086	14681.3	183.177	8.74837	2.73157	14.347	0.387051	12.3373	19.7187	2.00374	17.0301	291.078	7.36565	1.51871	191.404	2.61855	1659.43	0.643933	1.84967	0.317426	2.21105	12.1371	0.515341	1.62716	0.272781
1.05	640	0.0763341	9.12936		0.80844	67.2999	4.07212		15.3347			1.30715	1.97201		15.2788	72.6662	0	16.2113	0.0527048	0.00995834	1.28956	6.25932	3.51092	0.894565	94.5537	14581.6	179.861	7.85749	2.42035	14.5269	0.388835	11.9764	19.2862	1.96813	17.702	331.836	7.25823	1.49935	192.875	2.37167	1663.77	0.644244	1.82657	0.313457	2.18336	11.9825	0.508823	1.60721	0.269455
1.1	640	0.507759	8.98315		0.441339	64.0482	4.19612	3.90216	15.2369			1.36547	1.31892		15.6126	72.5217	0	16.3416	0.0529136	0.0102553	1.20618	6.52519	3.34211	0.897551	91.0178	14716.8	177.17	8.53139	2.60723	14.7912	0.394323	12.6367	20.1774	2.05575	18.5018	372.504	7.56396	1.52485	186.082	2.60203	1656.81	0.652393	1.75094	0.285485	1.85848	9.67447	0.400398	1.16703	0.180192
[truncated: 1,348 more rows]
[truncated: 8 more columns]

## Sheet: Table S10
Table S10 Mineral partition coefficients used in trace element modelling of partial melting of mafic rocks a
	Rb	Ba	Th	U	Nb	Ta	K	La	Ce	Pb	Pr	Sr	Nd	Sm	Zr	Hf	Eu	Gd	Dy	Ti	Y	Er	Yb	Lu
[truncated: 16 more rows]
